# Supplementary material for: Application of diazene-directed fragment assembly to the total synthesis and stereochemical assignment of (+)-desmethyl-meso-chimonanthine and related heterodimeric alkaloids
Source: Royal Society of Chemistry journal article supplement (doi:10.1039/c3sc52451e), 2013-09-27

**Application of diazene-directed fragment assembly to the enantioselective total synthesis and stereochemical assignment of (+)-desmethyl-*meso*-chimonanthine and related heterodimeric alkaloids.**

Stephen P. Lathrop and Mohammad Movassaghi\*

*Massachusetts Institute of Technology, Department of Chemistry, Massachusetts 02139*

**Supporting Information**

|                                                                                |     |
|--------------------------------------------------------------------------------|-----|
| General Procedures                                                             | S2  |
| Materials                                                                      | S2  |
| Instrumentation                                                                | S2  |
| Positional Numbering System                                                    | S3  |
| N1-Carboxymethyl Hexahydropyrroloindole (–)- <b>S2</b>                         | S4  |
| C2-Carboxymethyl Hexahydropyrroloindole (+)- <b>13</b>                         | S6  |
| N8-Carboxy- <i>tert</i> -Butyl Hexahydropyrroloindole (–)- <b>14</b>           | S7  |
| Hexahydropyrroloindole Sulfamate Ester (–)- <b>15</b>                          | S9  |
| C3a-Aminohexahydropyrroloindole (–)- <b>16</b>                                 | S11 |
| C2-Carboxymethyl Hexahydropyrroloindole (–)- <b>17</b>                         | S12 |
| N8- <i>tert</i> -Butylbenzenesulfonyl Hexahydropyrroloindole (–)- <b>18</b>    | S14 |
| Hexahydropyrroloindole Sulfamate Ester (–)- <b>19</b>                          | S16 |
| C3a-Aminohexahydropyrroloindole (–)- <b>20</b>                                 | S18 |
| N1-Carboxytrichloroethyl Hexahydropyrroloindole (+)- <b>S4</b>                 | S20 |
| C2-Carboxymethyl Hexahydropyrroloindole (+)- <b>21</b>                         | S22 |
| N8-Benzenesulfonyl Hexahydropyrroloindole (+)- <b>22</b>                       | S24 |
| C3a-Aminohexahydropyrroloindole (+)- <b>24</b>                                 | S26 |
| Mixed Sulfamide (–)- <b>25</b>                                                 | S28 |
| Unsymmetrical Diazene (–)- <b>26</b>                                           | S30 |
| Heterodimer (–)- <b>27</b>                                                     | S32 |
| Mixed Sulfamide (+)- <b>28</b>                                                 | S34 |
| Unsymmetrical Diazene (+)- <b>29</b>                                           | S36 |
| Heterodimer (+)- <b>30</b>                                                     | S38 |
| N8'-H Heterodimer (–)- <b>31</b>                                               | S40 |
| N8'-Methyl Heterodimer (–)- <b>32</b>                                          | S42 |
| (–)-N1,N1'-Carboxymethyl Calycanthidine ( <b>33</b> )                          | S44 |
| (–)-Calycanthidine ( <b>1</b> )                                                | S46 |
| NMR Comparison Tables for (–)-Calycanthidine ( <b>1</b> )                      | S48 |
| N1'-Carboxyethyl Heterodimer (+)- <b>34</b>                                    | S52 |
| (–)-N1-Carboxymethyl-N1'-Carboxyethyl <i>meso</i> -Chimonanthine ( <b>35</b> ) | S54 |
| <i>meso</i> -Chimonanthine ( <b>2</b> )                                        | S56 |
| NMR Comparison Tables for <i>meso</i> -Chimonanthine ( <b>2</b> )              | S58 |
| <i>meso</i> -Calycanthine ( <b>36</b> )                                        | S62 |
| NMR Comparison Tables for <i>meso</i> -Calycanthine ( <b>36</b> )              | S63 |
| (–)-N1-Carboxymethyl-N1'-Desmethyl- <i>meso</i> -Chimonanthine ( <b>37</b> )   | S65 |
| (–)-Desmethyl- <i>meso</i> -Chimonanthine ( <b>3</b> )                         | S67 |
| NMR Comparison Tables for Desmethyl- <i>meso</i> -Chimonanthine ( <b>3</b> )   | S70 |

|                                                                |     |
|----------------------------------------------------------------|-----|
| N1'-H Heterodimer (–)- <b>38</b>                               | S73 |
| N1'-Methyl Heterodimer (–)- <b>39</b>                          | S75 |
| (–)-N1-Carboxymethyl- <i>meso</i> -Chimonanthine ( <b>40</b> ) | S77 |
| (+)-Desmethyl- <i>meso</i> -Chimonanthine ( <b>3</b> )         | S79 |
| Copy of <sup>1</sup> H and <sup>13</sup> C NMR spectra         | S80 |

**General Procedures.** All reactions were performed in oven-dried or flame-dried round-bottom flasks. The flasks were fitted with rubber septa, and reactions were conducted under a positive pressure of argon. Cannulae or gas-tight syringes with stainless steel needles were used to transfer air- or moisture-sensitive liquids. Where necessary (so noted), solutions were deoxygenated by sparging with argon for a minimum of 10 min. Flash column chromatography was performed as described by Still et al.<sup>1</sup> using granular silica gel (60-Å pore size, 40–63 µm, 4–6% H<sub>2</sub>O content, Zeochem). Analytical thin layer chromatography (TLC) was performed using glass plates pre-coated with 0.25 mm 230–400 mesh silica gel impregnated with a fluorescent indicator (254 nm). TLC plates were visualized by exposure to short wave ultraviolet light (254 nm) and irreversibly stained by treatment with an aqueous solution of ceric ammonium molybdate (CAM) followed by heating (~ 1 min) on a hot plate (~ 250 °C). Organic solutions were concentrated at 29–30 °C on rotary evaporators capable of achieving a minimum pressure of ~2 torr. The diazene photolysis was accomplished by irradiation in a Rayonet RMR-200 photochemical reactor (Southern New England Ultraviolet Company, Branford, CT, USA) equipped with 16 lamps.

**Materials.** Commercial reagents and solvents were used as received with the following exceptions: dichloromethane, acetonitrile, tetrahydrofuran, methanol, pyridine, toluene, and triethylamine were purchased from J. T. Baker (Cycletainer<sup>TM</sup>) and were purified by the method of Grubbs *et al.* under positive argon pressure.<sup>2</sup> *N,N'*-diisopropylethylamine and benzene were dried by distillation over calcium hydride under an inert nitrogen atmosphere and used directly. L-tryptophan methyl ester hydrochloride was purchased from Chem-Impex International, Inc.; di-*tert*-butyl dicarbonate (Boc<sub>2</sub>O) was purchased from Oakwood Chemicals, Inc.; trimethyltin hydroxide and sodium bis(2-methoxyethoxy)aluminum hydride (Red-Al) were purchased from Strem Chemicals, Inc.; thiopyridine *N*-oxide and 2-methyl-2-phenylpropionic acid were purchased from TCI America; *N,N,N',N'*-tetramethylchloroformamidinium hexafluorophosphate (TCFH) was purchased from AK Scientific, Inc. All other solvents and chemicals were purchased from Sigma–Aldrich.

**Instrumentation.** Proton nuclear magnetic resonance (<sup>1</sup>H NMR) spectra were recorded with a Varian inverse probe 500 INOVA spectrometer. Chemical shifts are recorded in parts per million on the δ scale and are referenced from the residual protium in the NMR solvent (CHCl<sub>3</sub>: δ 7.24, CDHCl<sub>2</sub>: 5.32, CD<sub>2</sub>HCN: 1.94, CD<sub>3</sub>SOCD<sub>2</sub>H: 2.50, C<sub>6</sub>D<sub>5</sub>H: 7.16). Data are reported as follows: chemical shift [multiplicity (s = singlet, d = doublet, t = triplet, q = quartet, m = multiplet), coupling constant(s) in Hertz, integration, assignment]. Carbon-13 nuclear magnetic resonance spectra were recorded with a Varian 500 INOVA spectrometer and are recorded in parts per million on the δ scale and are referenced from the carbon resonances of the solvent (CDCl<sub>3</sub>: δ 77.23; CD<sub>2</sub>Cl<sub>2</sub>: 54.00 CD<sub>3</sub>CN: 118.69, DMSO-*d*<sub>6</sub>: 39.51, C<sub>6</sub>D<sub>6</sub>: 128.39). Data are reported as

<sup>1</sup> W. C. Still, M. Kahn, and A. Mitra. *J. Org. Chem.* 1978, **43**, 2923.

<sup>2</sup> A. B. Pangborn, M. A. Giardello, R. H. Grubbs, R. K. Rosen, and F. Timmers, *J. Organometallics* 1996, **15**, 1518.

follows: chemical shift [multiplicity (s = singlet, d = doublet, t = triplet, q = quartet, m = multiplet), coupling constant(s) in Hertz, assignment]. Fluorine-19 nuclear magnetic resonance spectra were recorded with a Varian 300 INOVA spectrometer and are recorded in parts per million on the  $\delta$  scale and are referenced from the fluorine resonances of trifluoroacetic acid ( $\text{CF}_3\text{CO}_2\text{H}$   $\delta$  -76.55). Data are reported as follows: chemical shift [multiplicity (s = singlet, d = doublet, t = triplet, q = quartet, m = multiplet), coupling constant(s) in Hertz, integration, assignment]. Infrared data were obtained with a Perkin-Elmer 2000 FTIR and are reported as follows: [frequency of absorption ( $\text{cm}^{-1}$ ), intensity of absorption (s = strong, m = medium, w = weak, br = broad), assignment]. We thank Dr. Li Li at the Massachusetts Institute of Technology Department of Chemistry instrumentation facility for obtaining mass spectroscopic data. High resolution mass spectra (HRMS) were recorded on a Bruker Daltonics APEXIV 4.7 Tesla FT-ICR-MS using electrospray (ESI) ( $m/z$ ) ionization source.

**Positional Numbering System.** In assigning the  $^1\text{H}$  and  $^{13}\text{C}$  NMR data of all intermediates en route to (-)-calycanthidine (**1**), *meso*-chimonanthine (**2**), *meso*-calycanthine (**36**), (-)- and (+)-*N*<sub>1</sub>-desmethyl-*meso*-chimonanthine (**3**) we have employed a uniform numbering system.

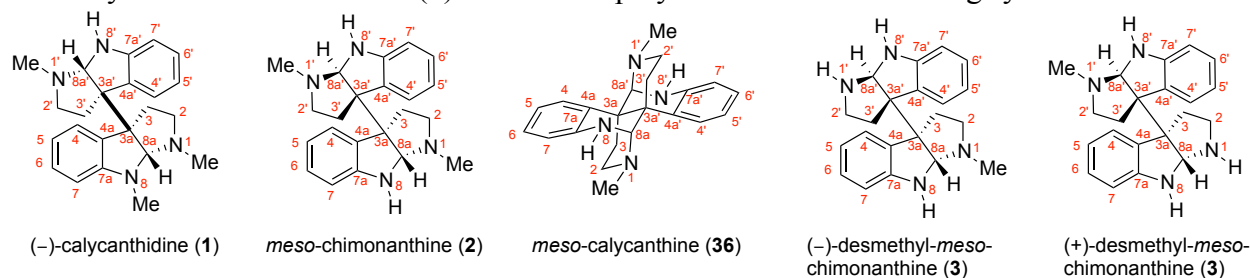

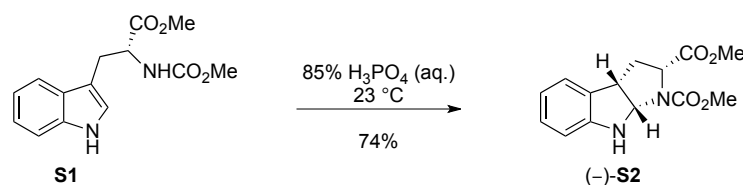

### **N1-Carboxymethyl Hexahydropyrroloindole (-)-S2:**

Aqueous phosphoric acid (85% w/v, 110 mL) was added to a flask containing indole **S1** (9.60 g, 36.3 mmol, 1 equiv) at 23 °C. The resulting heterogeneous mixture was stirred vigorously. After 8 h, the homogenous solution was poured slowly into a vigorously stirred biphasic mixture of dichloromethane (200 mL) and a solution of potassium carbonate (480 g) and potassium hydroxide (160 g) in water (1 L) at 0 °C. The pH of the mixture was maintained above 7 by the periodic addition of solid potassium carbonate (5 × 50 g). Once the addition was complete, the mixture was extracted with diethyl ether (3 × 300 mL). The combined organic layers were washed with brine (100 mL), were dried over anhydrous sodium sulfate, were filtered, and were concentrated under reduced pressure. The resulting residue was purified by flash column chromatography on silica gel (eluent: 15→25% acetone in hexanes) to give N1-carboxymethyl hexahydropyrroloindole (-)-**S2**<sup>3</sup> (7.40 g, 73.7%) as a white solid. Structural assignments were made using additional information from gCOSY, HSQC, and HMBC experiments.

<sup>1</sup>H NMR (500 MHz, C<sub>6</sub>D<sub>6</sub>, 20 °C):

*Major Rotamer:* δ 6.91 (app-t, *J* = 7.7 Hz, 1H, C<sub>6</sub>H), 6.78 (d, *J* = 7.5 Hz, 1H, C<sub>4</sub>H), 6.60 (app-t, *J* = 7.4 Hz, 1H, C<sub>5</sub>H), 6.33 (d, *J* = 7.7 Hz, 1H, C<sub>7</sub>H), 5.44 (d, *J* = 6.7 Hz, 1H C<sub>8a</sub>H), 5.39 (br-s, 1H, N<sub>8</sub>H), 4.27 (d, *J* = 9.0 Hz, 1H, C<sub>2</sub>H), 3.46 (s, 3H, N<sub>1</sub>CO<sub>2</sub>CH<sub>3</sub>), 3.30–3.27 (m, 1H, C<sub>3a</sub>H), 2.92 (s, 3H, CO<sub>2</sub>CH<sub>3</sub>), 2.30 (d, *J* = 13.1 Hz, 1H, C<sub>3</sub>H<sub>a</sub>), 1.92–1.84 (m, 1H, C<sub>3</sub>H<sub>b</sub>).

*Minor Rotamer:* δ 6.95 (app-t, *J* = 7.7 Hz, 1H, C<sub>6</sub>H), 6.81 (d, *J* = 7.5 Hz, 1H, C<sub>4</sub>H), 6.63 (app-t, *J* = 7.4 Hz, 1H, C<sub>5</sub>H), 6.45 (d, *J* = 7.7 Hz, 1H, C<sub>7</sub>H), 5.17 (d, *J* = 6.7 Hz, 1H C<sub>8a</sub>H), 4.77 (br-s, 1H, N<sub>8</sub>H), 4.61 (d, *J* = 9.0 Hz, 1H, C<sub>2</sub>H), 3.49 (s, 3H, N<sub>1</sub>CO<sub>2</sub>CH<sub>3</sub>), 3.30–3.27 (m, 1H, C<sub>3a</sub>H), 2.93 (s, 3H, CO<sub>2</sub>CH<sub>3</sub>), 2.29 (d, *J* = 13.1 Hz, 1H, C<sub>3</sub>H<sub>a</sub>), 1.92–1.84 (m, 1H, C<sub>3</sub>H<sub>b</sub>).

<sup>13</sup>C NMR (125.8 MHz, C<sub>6</sub>D<sub>6</sub>, 20 °C):

*Major Rotamer:* δ 171.9 (CO<sub>2</sub>CH<sub>3</sub>), 155.6 (N<sub>1</sub>CO<sub>2</sub>CH<sub>3</sub>), 151.3 (C<sub>7a</sub>), 129.1 (C<sub>4a</sub>), 128.9 (C<sub>6</sub>), 124.5 (C<sub>4</sub>), 118.8 (C<sub>5</sub>), 109.7 (C<sub>7</sub>), 78.1 (C<sub>8a</sub>), 59.6

<sup>3</sup> Due to facile opening of cyclotryptophan (-)-**S2** to the corresponding tryptophan derivative this material was used in the next step immediately following purification..

Application of diazene-directed fragment assembly to the enantioselective total synthesis and stereochemical assignment of (+)-desmethyl-*meso*-chimonanthine and related heterodimeric alkaloids.  
Stephen P. Lathrop and Mohammad Movassaghi\*

Page S5 / S153

(C<sub>2</sub>), 52.7 (N<sub>1</sub>CO<sub>2</sub>CH<sub>3</sub>), 52.0 (CO<sub>2</sub>CH<sub>3</sub>), 45.4 (C<sub>3a</sub>), 34.9 (C<sub>3</sub>).

*Minor Rotamer:*  $\delta$  172.1 (CO<sub>2</sub>CH<sub>3</sub>), 154.8 (N<sub>1</sub>CO<sub>2</sub>CH<sub>3</sub>), 150.8 (C<sub>7a</sub>), 129.0 (C<sub>4a</sub>), 128.7 (C<sub>6</sub>), 124.6 (C<sub>4</sub>), 119.2 (C<sub>5</sub>), 109.6 (C<sub>7</sub>), 77.3 (C<sub>8a</sub>), 60.1 (C<sub>2</sub>), 52.7 (N<sub>1</sub>CO<sub>2</sub>CH<sub>3</sub>), 51.9 (CO<sub>2</sub>CH<sub>3</sub>), 46.7 (C<sub>3a</sub>), 34.4 (C<sub>3</sub>).

FTIR (thin film) cm<sup>-1</sup>:

3383 (br-w), 2953 (m), 1755 (s), 1702 (s), 1611 (m), 1451 (s), 1382(s).

HRMS (ESI) (*m/z*):

calc'd for C<sub>14</sub>H<sub>17</sub>N<sub>2</sub>O<sub>4</sub> [M+H]<sup>+</sup>: 277.1183,  
found: 277.1179.

[ $\alpha$ ]<sub>D</sub><sup>24</sup>:

-232 (*c* = 1.52, CH<sub>2</sub>Cl<sub>2</sub>).

TLC (25% acetone in hexanes), R<sub>f</sub>:

0.38 (UV, CAM).

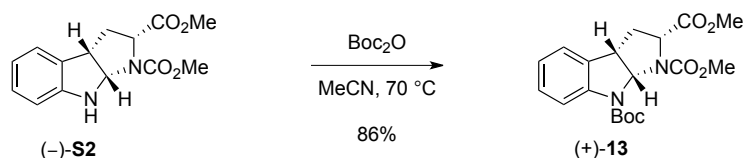

### **C2-Carboxymethyl Hexahydropyrroloindole (+)-13:**

Di-*tert*-butyl dicarbonate (7.70 g, 35.2 mmol, 3.00 equiv) was added to a solution of N1-carboxymethyl hexahydropyrroloindole (–)-**S2** (3.10 g, 11.7 mmol, 1 equiv) in acetonitrile (50 mL) at 23 °C. The reaction flask was fitted with a reflux condenser and heated to 70 °C. After 8 h, another portion of di-*tert*-butyl dicarbonate (7.70 g, 35.2 mmol, 3.00 equiv) was added and the solution was continued to stir at 70 °C. After 15 h, the homogenous solution was allowed to cool to 23 °C and concentrated under reduced pressure. The resulting residue was purified by flash column chromatography on silica gel (eluent: 10→20% acetone in hexanes) to give C2-carboxymethyl hexahydropyrroloindole (+)-**13** (3.80 g, 86.3%) as a white foam. Structural assignments were made using additional information from gCOSY, HSQC, and HMBC experiments.

<sup>1</sup>H NMR (500 MHz, CD<sub>3</sub>CN, 20 °C): δ 7.52 (d, *J* = 8.0 Hz, 1H, C<sub>7</sub>H), 7.19–7.14 (m, 2H, C<sub>4</sub>H, C<sub>6</sub>H), 6.98 (app-t, *J* = 7.5 Hz, 1H, C<sub>5</sub>H), 6.32 (d, *J* = 6.5 Hz, 1H, C<sub>8a</sub>H), 4.54 (d, *J* = 8.7 Hz, 1H, C<sub>2</sub>H), 4.01 (app-t, *J* = 6.6 Hz, 1H, C<sub>3a</sub>H), 3.66 (s, 3H, N<sub>1</sub>CO<sub>2</sub>CH<sub>3</sub>), 3.14 (s, 3H, CO<sub>2</sub>CH<sub>3</sub>), 2.58 (ddd, *J* = 7.0, 8.7, 13.2 Hz, 1H, C<sub>3</sub>H<sub>a</sub>), 2.53 (ddd, *J* = 1.7, 1.8, 13.2 Hz, 1H, C<sub>3</sub>H<sub>b</sub>), 1.55 (s, 9H, N<sub>8</sub>CO<sub>2</sub>C(CH<sub>3</sub>)<sub>3</sub>).

<sup>13</sup>C NMR (125.8 MHz, CD<sub>3</sub>CN, 20 °C): δ 173.1 (CO<sub>2</sub>CH<sub>3</sub>), 156.2 (N<sub>1</sub>CO<sub>2</sub>CH<sub>3</sub>), 153.6 (N<sub>8</sub>CO<sub>2</sub>C(CH<sub>3</sub>)<sub>3</sub>), 144.4 (C<sub>7a</sub>), 133.6 (C<sub>4a</sub>), 129.4 (C<sub>6</sub>), 125.4 (C<sub>4</sub>), 124.4 (C<sub>5</sub>), 117.9 (C<sub>7</sub>), 82.3 (N<sub>8</sub>CO<sub>2</sub>C(CH<sub>3</sub>)<sub>3</sub>), 76.7 (C<sub>8a</sub>), 60.7 (C<sub>2</sub>), 53.5 (N<sub>1</sub>CO<sub>2</sub>CH<sub>3</sub>), 52.3 (CO<sub>2</sub>CH<sub>3</sub>), 46.2 (C<sub>3a</sub>), 34.3 (C<sub>3</sub>), 28.9 (N<sub>8</sub>CO<sub>2</sub>C(CH<sub>3</sub>)<sub>3</sub>).

FTIR (thin film) cm<sup>–1</sup>: 2979 (m), 1705 (s), 1605 (w), 1482 (s), 1447 (s).

HRMS (ESI) (*m/z*): calc'd for C<sub>19</sub>H<sub>25</sub>N<sub>2</sub>O<sub>6</sub> [M+H]<sup>+</sup>: 377.1707, found: 377.1713.

[α]<sub>D</sub><sup>24</sup>: +2.4 (*c* = 1.7, CH<sub>2</sub>Cl<sub>2</sub>).

TLC (33% acetone in hexanes), *R*<sub>f</sub>: 0.47 (UV, CAM).

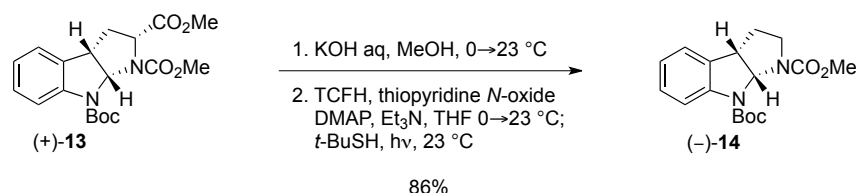

### **N8-Carboxy-*tert*-Butyl Hexahydropyrroloindole (–)-14:**

An aqueous solution of potassium hydroxide (5 N, 55 mL) was added to a solution of C2-carboxymethyl hexahydropyrroloindole (+)-**13** (3.20 g, 8.50 mmol, 1 equiv) in methanol (110 mL) at 0 °C in an ice bath. After 10 min, the ice bath was removed and the mixture was allowed to warm to 23 °C. After 2 h, the resulting solution was cooled to 0 °C in an ice bath and adjusted to pH ~ 2 by the dropwise addition of an aqueous solution of hydrochloric acid (12 N, 25 mL). The mixture was allowed to warm to 23 °C and extracted with dichloromethane (3 × 150 mL). The combined organic layers were washed with brine (50 mL), were dried over anhydrous sodium sulfate, were filtered, and were concentrated under reduced pressure to afford the crude carboxylic acid as a white foam.

Thiopyridine *N*-oxide (1.73 g, 13.6 mmol, 1.60 equiv), 4-(dimethylamino)pyridine (104 mg, 850 μmol, 0.10 equiv), and *N,N,N',N'*-tetramethylchloroformamidinium hexafluorophosphate (TCFH, 3.19 g, 12.8 mmol, 1.50 equiv) were sequentially added to a solution of the crude carboxylic acid in tetrahydrofuran (85 mL) cooled to 0 °C in an ice bath. The reaction flask was removed from the ice bath, covered in aluminum foil and triethylamine (4.75 mL, 34.0 mmol, 4.00 equiv) was added while the reaction mixture was still cold. After 1.5 h, *tert*-butylthiol (4.80 mL, 42.5 mmol, 5.00 equiv) was added via syringe and the aluminum foil was removed from the flask. The resulting suspension was irradiated with a flood lamp (500 W). After 2 h, the lamp was shut off and the tetrahydrofuran was removed under reduced pressure. The resulting residue was diluted with dichloromethane (200 mL) and was washed with aqueous saturated sodium bicarbonate solution (50 mL). The aqueous layer was extracted with dichloromethane (2 × 100 mL). The combined organic extracts were washed with brine (50 mL), were dried over anhydrous sodium sulfate, were filtered and were concentrated under reduced pressure. The resulting residue was purified by flash column chromatography on silica gel (eluent: 5→10% acetone in hexanes) to afford N8-carboxy-*tert*-butyl hexahydropyrroloindole (–)-**14** (2.33 g, 86.1%, overall from (+)-**13**) as a clear viscous oil. Structural assignments were made using additional information from gCOSY, HSQC, and HMBC experiments.

<sup>1</sup>H NMR (500 MHz, CD<sub>3</sub>CN, 20 °C):

δ 7.61 (d, *J* = 8.1 Hz, 1H, C<sub>7</sub>H), 7.23 (d, *J* = 7.4 Hz, 1H, C<sub>4</sub>H), 7.19 (app-t, *J* = 7.5 Hz, 1H, C<sub>6</sub>H), 7.03 (app-t, *J* = 7.5 Hz, 1H, C<sub>5</sub>H), 6.31 (d, *J* = 6.9 Hz, 1H, C<sub>8a</sub>H), 4.01 (app-t, *J* = 7.2 Hz, 1H, C<sub>3a</sub>H), 3.75 (dd, *J* = 7.7, 11.1 Hz, 1H, C<sub>2</sub>H<sub>a</sub>), 3.64 (s, 3H, N<sub>1</sub>CO<sub>2</sub>CH<sub>3</sub>), 2.76 (app-dt, *J* = 5.6, 11.6 Hz, 1H, C<sub>2</sub>H<sub>b</sub>), 2.15 (app-tt, *J* = 7.7, 12.0 Hz, 1H, C<sub>3</sub>H<sub>a</sub>), 2.05 (dd, *J* = 5.6, 6.9 Hz, 1H, C<sub>3</sub>H<sub>b</sub>), 1.53 (s, 9H, N<sub>8</sub>CO<sub>2</sub>C(CH<sub>3</sub>)<sub>3</sub>).

Application of diazene-directed fragment assembly to the enantioselective total synthesis and stereochemical assignment of (+)-desmethyl-*meso*-chimonanthine and related heterodimeric alkaloids.

Stephen P. Lathrop and Mohammad Movassaghi\*

Page S8 / S153

$^{13}\text{C}$  NMR (125.8 MHz,  $\text{CD}_3\text{CN}$ , 20 °C):  $\delta$  156.5 ( $\text{N}_1\text{CO}_2\text{CH}_3$ ), 153.8 ( $\text{N}_8\text{CO}_2\text{C}(\text{CH}_3)_3$ ), 144.2 ( $\text{C}_{7a}$ ), 133.9 ( $\text{C}_{4a}$ ), 129.2 ( $\text{C}_6$ ), 125.5 ( $\text{C}_4$ ), 124.6 ( $\text{C}_5$ ), 117.1 ( $\text{C}_7$ ), 82.3 ( $\text{N}_8\text{CO}_2\text{C}(\text{CH}_3)_3$ ), 78.1 ( $\text{C}_{8a}$ ), 53.3 ( $\text{N}_1\text{CO}_2\text{CH}_3$ ), 46.6 ( $\text{C}_{3a}$ ), 46.3 ( $\text{C}_2$ ), 32.0 ( $\text{C}_3$ ), 28.9 ( $\text{N}_8\text{CO}_2\text{C}(\text{CH}_3)_3$ ).

FTIR (thin film)  $\text{cm}^{-1}$ : 2977 (m), 1704 (s), 1604 (w), 1483 (s), 1446 (s).

HRMS (ESI) ( $m/z$ ): calc'd for  $\text{C}_{17}\text{H}_{23}\text{N}_2\text{O}_4$   $[\text{M}+\text{H}]^+$ : 319.1652, found: 319.1672.

$[\alpha]_{\text{D}}^{24}$ :  $-127$  ( $c = 1.37$ ,  $\text{CH}_2\text{Cl}_2$ ).

TLC (33% acetone in hexanes),  $R_f$ : 0.42 (UV, CAM).



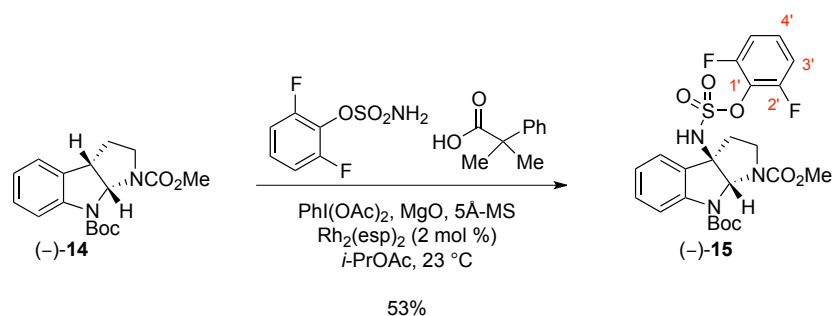

### Hexahydropyrroloindole Sulfamate Ester (–)-15:

A round bottom flask was charged with 5Å molecular sieves (296 mg, 200 mg/mmol of **14**), magnesium oxide (239 mg, 5.92 mmol, 4.00 equiv) and flame-dried under vacuum for 5 min. The reaction vessel was allowed to cool to 23 °C and back filled with argon. Solid 2,6-difluorophenyl sulfamate<sup>4</sup> (402 mg, 1.92 mmol, 1.30 equiv), 2-methyl-2-phenylpropionic acid (122 mg, 0.740 mmol, 0.500 equiv), and Rh<sub>2</sub>(esp)<sub>2</sub> (23.0 mg, 300 μmol, 0.0200 equiv) were added sequentially. A solution of N8-carboxy-*tert*-butyl hexahydropyrroloindole (–)-**14** (470 mg, 1.48 mmol, 1 equiv) in isopropyl acetate (3.0 mL) was added via syringe at 23 °C and the mixture was allowed to stir. After 5 min, (diacetoxyiodo)benzene (953 mg, 1.92 mmol, 2.00 equiv) was added and the green heterogeneous mixture was agitated by vigorous stirring at 23 °C. After 14 h, the reaction mixture was filtered through a pad of Celite and the filter cake was rinsed with ethyl acetate (40 mL). The filtrate was concentrated under reduced pressure. The resulting residue was purified by flash column chromatography on silica gel (eluent: gradient, 15→33% ethyl acetate in hexanes) to afford the hexahydropyrroloindole sulfamate ester (–)-**15** (413 mg, 53.1%) as a white solid. Structural assignments were made using additional information from gCOSY, HSQC, and HMBC experiments.

<sup>1</sup>H NMR (500 MHz, CD<sub>3</sub>CN, 20 °C): δ 7.68 (d, *J* = 8.1 Hz, 1H, C<sub>7</sub>H), 7.47 (d, *J* = 7.7 Hz, 1H, C<sub>4</sub>H), 7.39–7.32 (m, 2H, C<sub>6</sub>H, C<sub>4</sub>H), 7.16–7.11 (m, 3H, C<sub>5</sub>H, C<sub>3</sub>H), 7.06 (br-s, 1H, C<sub>3a</sub>NH), 6.50 (s, 1H, C<sub>8a</sub>H), 3.85 (dd, *J* = 6.9, 10.3 Hz, 1H, C<sub>2</sub>H<sub>a</sub>), 3.66 (s, 3H, N<sub>1</sub>CO<sub>2</sub>CH<sub>3</sub>), 2.77–2.65 (m, 2H, C<sub>2</sub>H<sub>b</sub>, C<sub>3</sub>H<sub>a</sub>), 2.47 (dd, *J* = 4.3, 11.4 Hz, 1H, C<sub>3</sub>H<sub>b</sub>), 1.50 (s, 9H, N<sub>8</sub>CO<sub>2</sub>C(CH<sub>3</sub>)<sub>3</sub>).

<sup>13</sup>C NMR (125.8 MHz, CD<sub>3</sub>CN, 20 °C): δ 157.2 (dd, *J* = 3.5, 251.8 Hz, C<sub>2</sub>'), 156.2 (N<sub>1</sub>CO<sub>2</sub>CH<sub>3</sub>), 153.5 (N<sub>8</sub>CO<sub>2</sub>C(CH<sub>3</sub>)<sub>3</sub>), 144.9 (C<sub>7a</sub>), 131.8 (C<sub>6</sub>), 130.8 (C<sub>4a</sub>), 129.2 (app-t, *J* = 9.4 Hz, C<sub>4</sub>'), 127.8 (t, *J* = 15.8 Hz, C<sub>1</sub>'), 125.9 (C<sub>4</sub>), 125.1 (C<sub>5</sub>), 118.1 (C<sub>7</sub>), 114.1 (dd, *J* = 4.0, 18.4 Hz, C<sub>3</sub>'), 82.7 (N<sub>8</sub>CO<sub>2</sub>C(CH<sub>3</sub>)<sub>3</sub>), 81.1, (C<sub>8a</sub>), 72.8 (C<sub>3a</sub>), 53.6 (N<sub>1</sub>CO<sub>2</sub>CH<sub>3</sub>), 46.2 (C<sub>2</sub>), 36.6 (C<sub>3</sub>), 28.8 (N<sub>8</sub>CO<sub>2</sub>C(CH<sub>3</sub>)<sub>3</sub>).

<sup>4</sup> J. L. Roizen, D. N. Zalatan and J. Du Bois, *Angew. Chem. Int. Ed.*, 2013, *Early View*, DOI: 10.1002/anie.201304238.

Application of diazene-directed fragment assembly to the enantioselective total synthesis and stereochemical assignment of (+)-desmethyl-*meso*-chimonanthine and related heterodimeric alkaloids.

Stephen P. Lathrop and Mohammad Movassaghi\*

Page S10 / S153

$^{19}\text{F}$  NMR (282 MHz,  $\text{CDCl}_3$ , 20 °C):  $\delta$  -124.8 (t,  $J$  = 6.6 Hz, 2F,  $\text{C}_6\text{H}_3\text{F}_2$ ).

FTIR (thin film)  $\text{cm}^{-1}$ : 3168 (br-m), 2981 (w), 1712 (s), 1680 (s), 1606 (w), 1481 (s).

HRMS (ESI) ( $m/z$ ): calc'd for  $\text{C}_{23}\text{H}_{26}\text{F}_2\text{N}_3\text{O}_7\text{S}$   $[\text{M}+\text{H}]^+$ : 526.1454, found: 526.1465.

$[\alpha]_{\text{D}}^{24}$ : -82 ( $c$  = 1.04,  $\text{CH}_2\text{Cl}_2$ ).

TLC (33% ethyl acetate in hexanes),  $R_f$ : 0.26 (UV, CAM).

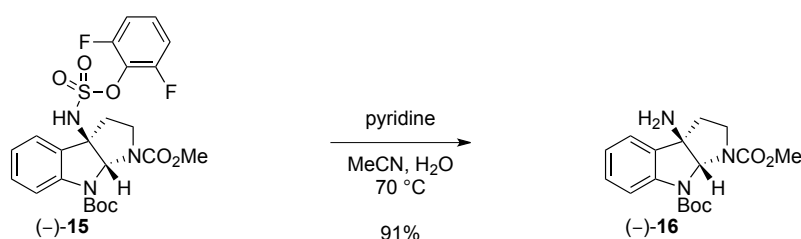

### C3a-Aminohexahydropyrroloindole (-)-**16**:

Pyridine (613  $\mu\text{L}$ , 7.61 mmol, 20.0 equiv) was added to a solution of hexahydropyrroloindole sulfamate ester (-)-**15** (200 mg, 381  $\mu\text{mol}$ , 1 equiv) in a mixture of acetonitrile–water (2:1, 4.50 mL), via syringe at 23  $^\circ\text{C}$ . The reaction flask was fitted with a reflux condenser and heated to 70  $^\circ\text{C}$ . After 24 h, the resulting yellow solution was allowed to cool to 23  $^\circ\text{C}$ . The mixture was diluted with dichloromethane (50 mL) and was washed with a saturated aqueous sodium bicarbonate solution (20 mL). The aqueous layer was extracted with dichloromethane ( $2 \times 30$  mL). The combined organic extracts were washed with brine (20 mL), were dried over anhydrous sodium sulfate, were filtered, and were concentrated under reduced pressure. The resulting residue was purified by flash column chromatography on silica gel (eluent: gradient, 1 $\rightarrow$ 5% methanol in dichloromethane) to afford the C3a-aminohexahydropyrroloindole (-)-**16** (115 mg, 90.5%) as a yellow oil. Structural assignments were made using additional information from gCOSY, HSQC, and HMBC experiments.

$^1\text{H}$  NMR (500 MHz,  $\text{CD}_3\text{CN}$ , 20  $^\circ\text{C}$ ):  $\delta$  7.63 (d,  $J = 8.1$  Hz, 1H,  $\text{C}_7\text{H}$ ), 7.34 (d,  $J = 7.5$  Hz, 1H,  $\text{C}_4\text{H}$ ), 7.26 (app-t,  $J = 7.5$  Hz, 1H,  $\text{C}_6\text{H}$ ), 7.07 (app-t,  $J = 7.5$  Hz, 1H,  $\text{C}_5\text{H}$ ), 5.77 (s, 1H,  $\text{C}_{8a}\text{H}$ ), 3.73 (dd,  $J = 7.9, 11.1$  Hz, 1H,  $\text{C}_2\text{H}_a$ ), 3.64 (s, 3H,  $\text{N}_1\text{CO}_2\text{CH}_3$ ), 2.75 (app-dt,  $J = 5.6, 11.7$  Hz, 1H,  $\text{C}_2\text{H}_b$ ), 2.22 (dd,  $J = 7.9, 11.1$  Hz, 1H,  $\text{C}_3\text{H}_a$ ), 2.09 (app-dt,  $J = 8.1, 12.2$  Hz, 1H,  $\text{C}_3\text{H}_b$ ), 1.92 (br-s, 2H,  $\text{NH}_2$ ), 1.54 (s, 9H,  $\text{N}_8\text{CO}_2\text{C}(\text{CH}_3)_3$ ).

$^{13}\text{C}$  NMR (125.8 MHz,  $\text{CD}_3\text{CN}$ , 20  $^\circ\text{C}$ ):  $\delta$  156.5 ( $\text{N}_1\text{CO}_2\text{CH}_3$ ), 154.0 ( $\text{N}_8\text{CO}_2\text{C}(\text{CH}_3)_3$ ), 143.9 ( $\text{C}_{7a}$ ), 136.9 ( $\text{C}_{4a}$ ), 130.3 ( $\text{C}_6$ ), 124.8 (2C,  $\text{C}_4$ ,  $\text{C}_5$ ), 117.5 ( $\text{C}_7$ ), 84.6 ( $\text{C}_{8a}$ ), 82.3 ( $\text{N}_8\text{CO}_2\text{C}(\text{CH}_3)_3$ ), 70.3 ( $\text{C}_{3a}$ ), 53.3 ( $\text{N}_1\text{CO}_2\text{CH}_3$ ), 47.0 ( $\text{C}_2$ ), 39.4 ( $\text{C}_3$ ), 28.9 ( $\text{N}_8\text{CO}_2\text{C}(\text{CH}_3)_3$ ).

FTIR (thin film)  $\text{cm}^{-1}$ : 3369 (br-w), 3302 (br-w), 2977 (w), 1702 (s), 1603 (w), 1480 (m), 1447 (m), 1393 (m), 1200 (m).

HRMS (ESI) ( $m/z$ ): calc'd for  $\text{C}_{17}\text{H}_{24}\text{N}_3\text{O}_4$   $[\text{M}+\text{H}]^+$ : 334.1761, found: 334.1783.

$[\alpha]_D^{24}$ :  $-119$  ( $c = 1.55$ ,  $\text{CH}_2\text{Cl}_2$ ).

TLC (50% acetone in hexanes),  $R_f$ : 0.15 (UV, CAM).

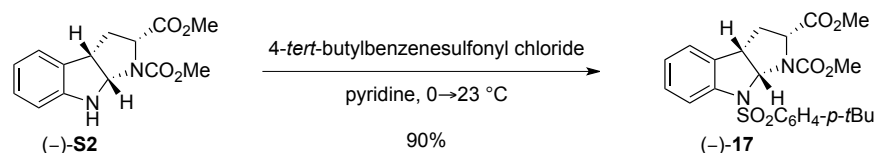

### **C2-Carboxymethyl Hexahydropyrroloindole (-)-17:**

A solution of 4-*tert*-butylbenzenesulfonyl chloride (3.50 g, 15.1 mmol, 2.00 equiv) in pyridine (3 mL) was added dropwise via syringe to a solution of hexahydropyrroloindole (-)-**S2** (2.00 g, 7.57 mmol, 1 equiv) in pyridine (20 mL) at 0 °C in an ice bath. After 15 min, the ice bath was removed and allowed to warm to 23 °C. After 4 h, the solution was concentrated under reduced pressure. The resulting residue was diluted with ethyl acetate (250 mL) and washed sequentially with an aqueous solution of hydrochloric acid (1 N, 2 × 25 mL), saturated aqueous solution of sodium bicarbonate (25 mL), and brine (50 mL). The organic layer was separated, was dried over anhydrous sodium sulfate, was filtered, and was concentrated under reduced pressure. The resulting residue was purified by flash column chromatography on silica gel (eluent: 15→25% acetone in hexanes) to give C2-carboxymethyl hexahydropyrroloindole (-)-**17** (3.20 g, 89.5%) as a white solid.

As a result of the slow conformational equilibration at ambient temperature, NMR spectra were collected at elevated temperature. Structural assignments were made using additional information from gCOSY, HSQC, and HMBC experiments also collected at elevated temperature.

$^1\text{H}$  NMR (500 MHz,  $\text{CD}_3\text{CN}$ , 70 °C):  $\delta$  7.66 (d,  $J$  = 8.6 Hz, 2H,  $\text{N}_8\text{SO}_2\text{Ar-}o\text{-H}$ ), 7.50 (d,  $J$  = 8.6 Hz, 2H,  $\text{N}_8\text{SO}_2\text{Ar-}m\text{-H}$ ), 7.38 (d,  $J$  = 8.1 Hz, 1H,  $\text{C}_7\text{H}$ ), 7.23 (app-t,  $J$  = 7.2 Hz, 1H,  $\text{C}_6\text{H}$ ), 7.10 (d,  $J$  = 7.4 Hz, 1H,  $\text{C}_4\text{H}$ ), 7.07 (app-t,  $J$  = 7.2 Hz, 1H,  $\text{C}_5\text{H}$ ), 6.29 (d,  $J$  = 6.5 Hz, 1H  $\text{C}_{8a}\text{H}$ ), 4.54 (d,  $J$  = 9.0 Hz, 1H,  $\text{C}_2\text{H}$ ), 3.71 (app-t,  $J$  = 6.9 Hz, 1H,  $\text{C}_{3a}\text{H}$ ), 3.60 (s, 3H,  $\text{N}_1\text{CO}_2\text{CH}_3$ ), 3.16 (s, 3H,  $\text{CO}_2\text{CH}_3$ ), 2.61–2.49 (m, 2H,  $\text{C}_3\text{H}$ ), 1.30 (s, 9H,  $\text{C}(\text{CH}_3)_3$ ).

$^{13}\text{C}$  NMR (125.8 MHz,  $\text{CD}_3\text{CN}$ , 70 °C):  $\delta$  173.2 ( $\text{CO}_2\text{CH}_3$ ), 158.9 ( $\text{N}_8\text{SO}_2\text{Ar-}p\text{-C}$ ), 156.5 ( $\text{N}_1\text{CO}_2\text{CH}_3$ ), 144.3 ( $\text{C}_{7a}$ ), 138.5 ( $\text{N}_8\text{SO}_2\text{Ar-}ipso\text{-C}$ ), 135.8 ( $\text{C}_{4a}$ ), 130.2 ( $\text{C}_6$ ), 128.6 ( $\text{N}_8\text{SO}_2\text{Ar-}o\text{-C}$ ), 127.7 ( $\text{N}_8\text{SO}_2\text{Ar-}m\text{-C}$ ), 126.9 ( $\text{C}_4$ ), 126.3 ( $\text{C}_5$ ), 119.8 ( $\text{C}_7$ ), 82.5 ( $\text{C}_{8a}$ ), 60.9 ( $\text{C}_2$ ), 53.8 ( $\text{NCO}_2\text{CH}_3$ ), 53.1 ( $\text{CO}_2\text{CH}_3$ ), 47.4 ( $\text{C}_{3a}$ ), 36.6 ( $\text{C}(\text{CH}_3)_3$ ), 35.1 ( $\text{C}_3$ ), 32.1 ( $\text{C}(\text{CH}_3)_3$ ).

FTIR (thin film)  $\text{cm}^{-1}$ : 2956 (w), 1711 (s), 1595 (w), 1447 (m), 1384 (m), 1360 (m), 1169 (m).

HRMS (ESI) ( $m/z$ ): calc'd for  $\text{C}_{24}\text{H}_{29}\text{N}_2\text{O}_6\text{S}$   $[\text{M}+\text{H}]^+$ : 473.1741, found: 473.1740.

Application of diazene-directed fragment assembly to the enantioselective total synthesis and stereochemical assignment of (+)-desmethyl-*meso*-chimonanthine and related heterodimeric alkaloids.  
Stephen P. Lathrop and Mohammad Movassaghi\*

Page S13 / S153

$[\alpha]_{\text{D}}^{24}$ :  $-71$  ( $c = 0.44$ ,  $\text{CH}_2\text{Cl}_2$ ).

TLC (33% acetone in hexanes),  $R_f$ : 0.33 (UV, CAM).

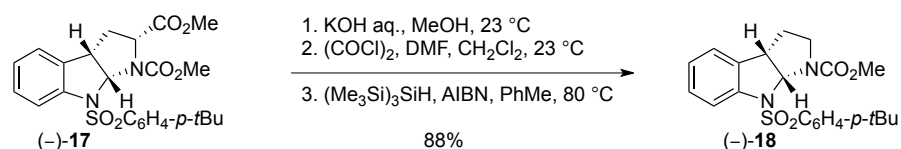

### **N8-*tert*-Butylbenzenesulfonyl Hexahydropyrroloindole (-)-18:**

An aqueous solution of potassium hydroxide (5 N, 30 mL) was added to a solution of C2-carboxymethyl hexahydropyrroloindole (-)-17 (3.10 g, 6.56 mmol, 1.00 equiv) in methanol (60 mL) at 23 °C. After 40 min, the resulting solution was cooled to 0 °C in an ice bath and adjusted to pH ~ 2 by the dropwise addition of an aqueous solution of hydrochloric acid (12 N, 15 mL). The mixture was allowed to warm to 23 °C and was extracted with dichloromethane (3 × 150 mL). The combined organic layers were washed with brine (50 mL), were dried over anhydrous sodium sulfate, were filtered, and were concentrated under reduced pressure to afford the crude carboxylic acid as a white foam. The crude carboxylic acid was concentrated from benzene (15 mL) under reduced pressure to remove residual methanol.

Oxalyl chloride (1.60 mL, 18.9 mmol, 3.00 equiv) and dimethylformamide (48.0 μL, 630 μmol, 0.100 equiv) were added sequentially via syringe to a solution of the crude carboxylic acid in dichloromethane (65 mL) at 23 °C. After 1 h, the solution was concentrated under reduced pressure. The resulting residue was concentrated from benzene (2 × 20 mL) to remove the remaining oxalyl chloride. The crude acid chloride was dissolved in toluene (120 mL) and argon was bubbled through the solution for 10 min. Tris(trimethylsilyl)silane (2.90 mL, 9.45 mmol, 1.50 equiv) and azobisisobutyronitrile (AIBN, 103 mg, 630 μmol, 0.10 equiv) were added to the solution at 23 °C. The flask was fitted with a reflux condenser and heated to 80 °C. After 45 min, an additional portion of tris(trimethylsilyl)silane (2.90 mL, 9.45 mmol, 1.50 equiv) and AIBN (103 mg, 630 μmol, 0.10 equiv) were added. After a further 1.5 h, another portion of AIBN (103 mg, 630 μmol, 0.10 equiv) was added. After an additional 1.5 h the reaction mixture was allowed to cool to 23 °C and was concentrated under reduced pressure. The resulting residue was purified by flash column chromatography on silica gel (eluent: 15→20% acetone in hexanes) to give N8-*tert*-butylbenzenesulfonyl hexahydropyrroloindole (-)-18 (2.40 g, 88.3%, overall from (-)-17) as a white foam.

As a result of the slow conformational equilibration at ambient temperature, NMR spectra were collected at elevated temperature. Structural assignments were made using additional information from gCOSY, HSQC, and HMBC experiments also collected at elevated temperature.

<sup>1</sup>H NMR (500 MHz, CD<sub>3</sub>CN, 70 °C):

δ 7.65 (d, *J* = 8.6 Hz, 2H, N<sub>8</sub>SO<sub>2</sub>Ar-*o*-H), 7.50–7.49 (m, 3H, N<sub>8</sub>SO<sub>2</sub>Ar-*m*-H, C<sub>7</sub>H), 7.25 (app-t, *J* = 8.0 Hz, 1H, C<sub>6</sub>H), 7.16 (d, *J* = 7.4 Hz, 1H, C<sub>4</sub>H), 7.10 (app-t, *J* = 7.4 Hz, 1H, C<sub>5</sub>H), 6.25 (d, *J* = 6.7 Hz, 1H, C<sub>8a</sub>H), 3.74–3.70 (m, 2H, C<sub>3a</sub>H, C<sub>2</sub>H<sub>a</sub>), 3.67 (s, 3H, N<sub>1</sub>CO<sub>2</sub>CH<sub>3</sub>), 2.77 (app-dt, *J* = 5.7, 11.5 Hz, 1H, C<sub>2</sub>H<sub>b</sub>), 2.15 (app-ddt, *J* = 7.9, 11.6, 12.6 Hz, 1H, C<sub>3</sub>H<sub>a</sub>), 2.00 (dd, *J* = 5.5, 12.2 Hz, 1H, C<sub>3</sub>H<sub>b</sub>), 1.30 (s, 9H, C(CH<sub>3</sub>)<sub>3</sub>).

Application of diazene-directed fragment assembly to the enantioselective total synthesis and stereochemical assignment of (+)-desmethyl-*meso*-chimonanthine and related heterodimeric alkaloids.

Stephen P. Lathrop and Mohammad Movassaghi\*

Page S15 / S153

|                                                                  |                                                                                                                                                                                                                                                                                                                                                                                                                                                                                                                                                                                                                                                                    |
|------------------------------------------------------------------|--------------------------------------------------------------------------------------------------------------------------------------------------------------------------------------------------------------------------------------------------------------------------------------------------------------------------------------------------------------------------------------------------------------------------------------------------------------------------------------------------------------------------------------------------------------------------------------------------------------------------------------------------------------------|
| $^{13}\text{C}$ NMR (125.8 MHz, $\text{CD}_3\text{CN}$ , 70 °C): | $\delta$ 159.1 ( $\text{N}_8\text{SO}_2\text{Ar-}p\text{-C}$ ), 156.6 ( $\text{N}_1\text{CO}_2\text{CH}_3$ ), 143.9 ( $\text{C}_{7a}$ ), 137.9 ( $\text{N}_8\text{SO}_2\text{Ar-}ipso\text{-C}$ ), 136.0 ( $\text{C}_{4a}$ ), 130.0 ( $\text{C}_6$ ), 128.8 ( $\text{N}_8\text{SO}_2\text{Ar-}o\text{-C}$ ), 127.8 ( $\text{N}_8\text{SO}_2\text{Ar-}m\text{-C}$ ), 127.1 ( $\text{C}_4$ ), 126.3 ( $\text{C}_5$ ), 118.9 ( $\text{C}_7$ ), 82.0 ( $\text{C}_{8a}$ ), 53.7 ( $\text{N}_1\text{CO}_2\text{CH}_3$ ), 47.8 ( $\text{C}_{3a}$ ), 46.5 ( $\text{C}_2$ ), 36.6 ( $\text{C}(\text{CH}_3)_3$ ), 32.2 ( $\text{C}_3$ ), 32.1 ( $\text{C}(\text{CH}_3)_3$ ). |
| FTIR (thin film) $\text{cm}^{-1}$ :                              | 2961 (m), 1709 (s), 1447 (m), 1385 (m), 1360 (m).                                                                                                                                                                                                                                                                                                                                                                                                                                                                                                                                                                                                                  |
| HRMS (ESI) ( $m/z$ ):                                            | calc'd for $\text{C}_{22}\text{H}_{27}\text{N}_2\text{O}_4\text{S}$ $[\text{M}+\text{H}]^+$ : 415.1686,<br>found: 415.1676 .                                                                                                                                                                                                                                                                                                                                                                                                                                                                                                                                       |
| $[\alpha]_D^{24}$ :                                              | -198 ( $c = 0.19$ , $\text{CH}_2\text{Cl}_2$ ).                                                                                                                                                                                                                                                                                                                                                                                                                                                                                                                                                                                                                    |
| TLC (33% acetone in hexanes), $R_f$ :                            | 0.34 (UV, CAM).                                                                                                                                                                                                                                                                                                                                                                                                                                                                                                                                                                                                                                                    |

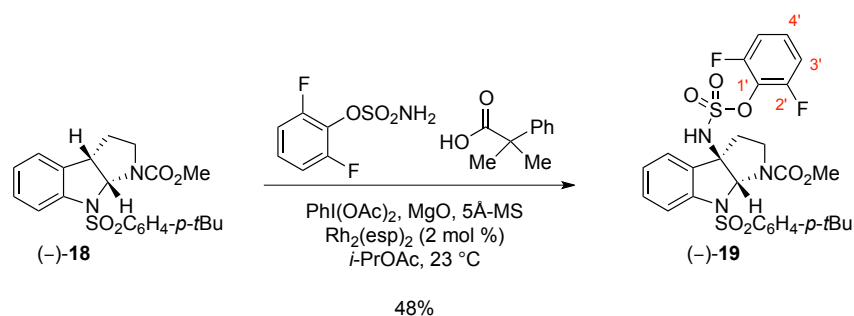

### Hexahydropyrroloindole Sulfamate Ester (–)-19:

A round bottom flask was charged with 5 Å molecular sieves (482 mg, 200 mg/mmol of **18**), magnesium oxide (388 mg, 9.64 mmol, 4.00 equiv), and flame-dried under vacuum for 5 min. The reaction vessel was allowed to cool to 23 °C and back filled with argon. Solid 2,6-difluorophenyl sulfamate<sup>4</sup> (656 mg, 3.14 mmol, 1.30 equiv), 2-methyl-2-phenylpropionic acid (198 mg, 1.21 mmol, 0.500 equiv), and Rh<sub>2</sub>(esp)<sub>2</sub> (3.7 mg, 48 μmol, 0.020 equiv) were added sequentially and the mixture was sealed under argon. A solution of N8-*tert*-butylbenzenesulfonyl hexahydropyrroloindole (–)-**18** (1.00 g, 2.41 mmol, 1 equiv) in isopropyl acetate (5.0 mL) was added via syringe at 23 °C and the mixture was allowed to stir. After 5 min, (diacetoxyiodo)benzene (1.55 g, 4.82 mmol, 2.00 equiv) was added and the resulting green heterogeneous mixture was agitated by vigorous stirring at 23 °C. After 14 h, the mixture was filtered through a pad of Celite and the filter cake was rinsed with ethyl acetate (50 mL). The filtrate was concentrated under reduced pressure. The resulting residue was purified by flash column chromatography on silica gel (eluent: gradient, 15→20% acetone in hexanes) to afford a mixture of the desired sulfamate ester (–)-**19** along with minor amounts of regioisomeric amination products. The mixture was triturated with dichloromethane in hexanes (33% v/v, 20 mL) and the resulting suspension was filtered over a sintered glass funnel and rinsed with cold dichloromethane in hexanes (33% v/v, 10 mL) to afford pure hexahydropyrroloindole sulfamate ester (–)-**19** (0.578 g, 38.5%) as a white solid. The filtrate was concentrated under reduced pressure. The resulting residue was purified by flash column chromatography on silica gel (eluent: gradient, 20→33% ethyl acetate in hexanes) to afford a second portion of pure hexahydropyrroloindole sulfamate ester (–)-**19** (140 mg, 9.3%) as a white solid. Structural assignments were made using additional information from gCOSY, HSQC, and HMBC experiments.

<sup>1</sup>H NMR (500 MHz, CDCl<sub>3</sub>, 20 °C):

δ 7.71 (d, *J* = 8.1 Hz, 1H, C<sub>7</sub>H), 7.57 (br-s, 2H, N<sub>8</sub>SO<sub>2</sub>Ar-*o*-H), 7.43 (app-t, *J* = 7.6 Hz, 1H, C<sub>6</sub>H), 7.37–7.34 (m, C<sub>4</sub>H, N<sub>8</sub>SO<sub>2</sub>Ar-*m*-H), 7.26–7.20 (m, C<sub>5</sub>H, C<sub>4</sub>H), 7.01 (app-t, *J* = 7.8 Hz, 2H, C<sub>3</sub>H), 6.20 (s, 1H, C<sub>8a</sub>H), 3.94 (s, 1H, C<sub>3a</sub>NH), 3.86 (dd, *J* = 8.0, 11.1, 1H, C<sub>2</sub>H<sub>a</sub>), 3.72 (s, 3H, N<sub>1</sub>CO<sub>2</sub>CH<sub>3</sub>), 2.99 (app-dt, *J* = 8.1, 12.1 Hz, 1H, C<sub>2</sub>H<sub>a</sub>), 2.76 (br-s, 1H, C<sub>2</sub>H<sub>b</sub>), 2.43 (dd, *J* = 4.9, 12.4 Hz, 1H C<sub>3</sub>H<sub>b</sub>), 1.18 (s, 9H, C(CH<sub>3</sub>)<sub>3</sub>).



Application of diazene-directed fragment assembly to the enantioselective total synthesis and stereochemical assignment of (+)-desmethyl-*meso*-chimonanthine and related heterodimeric alkaloids.

Stephen P. Lathrop and Mohammad Movassaghi\*

Page S17 / S153

|                                                           |                                                                                                                                                                                                                                                                                                                                                                                                                                                                                                                                                                                                                                                                                                                                                                                                                                                     |
|-----------------------------------------------------------|-----------------------------------------------------------------------------------------------------------------------------------------------------------------------------------------------------------------------------------------------------------------------------------------------------------------------------------------------------------------------------------------------------------------------------------------------------------------------------------------------------------------------------------------------------------------------------------------------------------------------------------------------------------------------------------------------------------------------------------------------------------------------------------------------------------------------------------------------------|
| $^{13}\text{C}$ NMR (125.8 MHz, $\text{CDCl}_3$ , 20 °C): | $\delta$ 157.9 ( $\text{N}_8\text{SO}_2\text{Ar-}p\text{-C}$ ), 156.1 (dd, $J = 3.4$ , 253.7 Hz, $\text{C}_{2'}$ ), 155.0 ( $\text{N}_1\text{CO}_2\text{CH}_3$ ), 142.7 ( $\text{C}_{7a}$ ), 135.1 ( $\text{N}_8\text{SO}_2\text{Ar-}ipso\text{-C}$ ), 131.9 ( $\text{C}_{4a}$ ), 131.6 ( $\text{C}_6$ ), 128.1 (app-t, $J = 9.3$ Hz, $\text{C}_{1'}$ ), 127.7 ( $\text{C}_{4'}$ ), 127.1 ( $\text{N}_8\text{SO}_2\text{Ar-}o\text{-C}$ ), 126.8 ( $\text{N}_8\text{SO}_2\text{Ar-}m\text{-C}$ ), 126.7 ( $\text{C}_5$ ), 124.3 ( $\text{C}_4$ ), 119.7 ( $\text{C}_7$ ), 112.9 (dd, $J = 3.9$ , 18.4 Hz, $\text{C}_{3'}$ ), 82.6 ( $\text{C}_{8a}$ ), 72.6 ( $\text{C}_{3a}$ ), 53.1 ( $\text{N}_1\text{CO}_2\text{CH}_3$ ), 45.2 ( $\text{C}_2$ ), 35.4 ( $\text{C}(\text{CH}_3)_3$ ), 32.7 ( $\text{C}_3$ ), 31.0 ( $\text{C}(\text{CH}_3)_3$ ). |
| $^{19}\text{F}$ NMR (282 MHz, $\text{CDCl}_3$ , 20 °C):   | $\delta$ -124.9 (t, $J = 6.6$ Hz, 2F, $\text{C}_6\text{H}_3\text{F}_2$ ).                                                                                                                                                                                                                                                                                                                                                                                                                                                                                                                                                                                                                                                                                                                                                                           |
| FTIR (thin film) $\text{cm}^{-1}$ :                       | 2964 (m), 1689 (m), 1498 (m), 1390 (m), 1176 (w).                                                                                                                                                                                                                                                                                                                                                                                                                                                                                                                                                                                                                                                                                                                                                                                                   |
| HRMS (ESI) ( $m/z$ ):                                     | calc'd for $\text{C}_{28}\text{H}_{30}\text{F}_2\text{N}_3\text{O}_7\text{S}_2$ $[\text{M}+\text{H}]^+$ : 622.1488, found: 622.1499.                                                                                                                                                                                                                                                                                                                                                                                                                                                                                                                                                                                                                                                                                                                |
| $[\alpha]_D^{24}$ :                                       | -46 ( $c = 0.35$ , $\text{CH}_2\text{Cl}_2$ ).                                                                                                                                                                                                                                                                                                                                                                                                                                                                                                                                                                                                                                                                                                                                                                                                      |
| TLC (33% acetone in hexanes), $R_f$ :                     | 0.26 (UV, CAM).                                                                                                                                                                                                                                                                                                                                                                                                                                                                                                                                                                                                                                                                                                                                                                                                                                     |

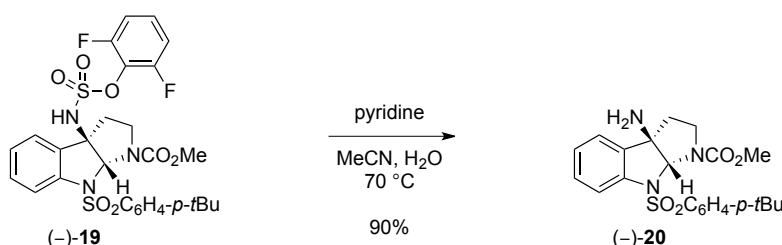

**C3a-Aminohexahydropyrroloindole (-)-20:**

Pyridine (130  $\mu$ L, 1.61 mmol, 20.0 equiv) was added to a solution of hexahydropyrroloindole sulfamate ester (–)-**19** (50.0 mg, 80.0  $\mu$ mol, 1 equiv) in a mixture of acetonitrile–water (2:1, 900  $\mu$ L) via syringe at 23  $^{\circ}$ C. The reaction flask was fitted with a reflux condenser and heated to 70  $^{\circ}$ C. After 24 h, the resulting yellow solution was allowed to cool to 23  $^{\circ}$ C. The mixture was diluted with dichloromethane (25 mL) and was washed with a saturated aqueous sodium bicarbonate solution (10 mL). The aqueous layer was extracted with dichloromethane (2  $\times$  15 mL). The combined organic extracts were washed with brine (10 mL), were dried over anhydrous sodium sulfate, were filtered, and were concentrated under reduced pressure. The resulting residue was purified by flash column chromatography on silica gel (eluent: gradient, 2 $\rightarrow$ 5% methanol in dichloromethane) to afford the C3a-amino-hexahydropyrroloindole (–)-**20** (31.0 mg, 90.2%) as a yellow oil.

As a result of the slow conformational equilibration at ambient temperature, NMR spectra were collected at elevated temperature. Structural assignments were made using additional information from gCOSY, HSQC, and HMBC experiments also collected at elevated temperature.

<sup>1</sup>H NMR (500 MHz, CD<sub>3</sub>CN, 70 °C): δ 7.75 (d, *J* = 8.5 Hz, 2H, N<sub>8</sub>SO<sub>2</sub>Ar-*o*-H), 7.55–7.53 (m, 3H, N<sub>8</sub>SO<sub>2</sub>Ar-*m*-H, C<sub>7</sub>H), 7.34–7.29 (m, 2H, C<sub>6</sub>H, C<sub>4</sub>H), 7.17 (app-t, *J* = 7.5 Hz, 1H, C<sub>5</sub>H), 5.71 (s, 1H, C<sub>8a</sub>H), 3.76 (app-t, *J* = 9.5 Hz, 1H, C<sub>2</sub>H<sub>a</sub>), 3.67 (s, 3H, N<sub>1</sub>CO<sub>2</sub>CH<sub>3</sub>), 2.80 (app-dt, *J* = 6.0, 11.1 Hz, 1H, C<sub>2</sub>H<sub>b</sub>) 2.14 (dd, *J* = 6.0, 12.5 Hz, 1H, C<sub>3</sub>H<sub>a</sub>), 2.07 (app-dt, *J* = 8.0, 11.0 Hz, 1H, C<sub>3</sub>H<sub>b</sub>), 1.43 (br-s, 2H, NH<sub>2</sub>) 1.30 (s, 9H, C(CH<sub>3</sub>)<sub>3</sub>).

<sup>13</sup>C NMR (125.8 MHz, CD<sub>3</sub>CN, 70 °C): δ 159.3 (N<sub>8</sub>SO<sub>2</sub>Ar-*p*-C), 156.8 (N<sub>1</sub>CO<sub>2</sub>CH<sub>3</sub>), 143.4 (C<sub>7a</sub>), 138.3 (C<sub>4a</sub>), 137.9 (N<sub>8</sub>SO<sub>2</sub>Ar-*ipso*-C), 131.1 (C<sub>6</sub>), 129.0 (N<sub>8</sub>SO<sub>2</sub>Ar-*o*-C), 127.9 (N<sub>8</sub>SO<sub>2</sub>Ar-*m*-C), 127.0 (C<sub>5</sub>), 125.6 (C<sub>4</sub>), 118.6 (C<sub>7</sub>), 88.5 (C<sub>8a</sub>), 71.9 (C<sub>3a</sub>), 53.7 (N<sub>1</sub>CO<sub>2</sub>CH<sub>3</sub>), 47.4 (C<sub>2</sub>), 40.5 (C<sub>3</sub>), 36.7 (C(CH<sub>3</sub>)<sub>3</sub>), 32.0 (C(CH<sub>3</sub>)<sub>3</sub>).

FTIR (thin film)  $\text{cm}^{-1}$ : 3380 (br-w), 3316 (br-w), 2962 (m), 1710 (s), 1595 (w), 1448 (m), 1385 (m), 1197 (m).

HRMS (ESI) ( $m/z$ ): calc'd for  $C_{22}H_{27}N_3NaO_4S$   $[M+Na]^+$ : 452.1614, found: 452.1633.

Application of diazene-directed fragment assembly to the enantioselective total synthesis and stereochemical assignment of (+)-desmethyl-*meso*-chimonanthine and related heterodimeric alkaloids.  
Stephen P. Lathrop and Mohammad Movassaghi\*

Page S19 / S153

$[\alpha]_{\text{D}}^{24}$ :  $-175$  ( $c = 1.66$ ,  $\text{CH}_2\text{Cl}_2$ ).

TLC (50% acetone in hexanes),  $R_f$ : 0.24 (UV, CAM).

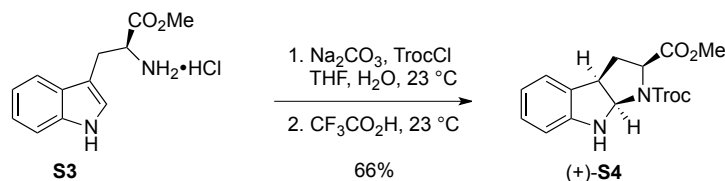

### **N1-Carboxytrichloroethyl Hexahydropyrroloindole (+)-S4:**

Sodium carbonate (8.30 g, 78.5 mmol, 2.00 equiv) was added in one portion as a solid to a solution of L-tryptophan methyl ester hydrochloride (**S3**) (10.0 g, 39.3 mmol, 1 equiv) in tetrahydrofuran–water (1:1, 400 mL) at 23 °C. After 10 min, 2,2,2-trichloroethyl chloroformate (7.00 mL, 51.0 mmol, 1.30 equiv) was added via syringe. After 1 h, tetrahydrofuran was removed under reduced pressure, and the resulting aqueous suspension was extracted with dichloromethane (3 × 300 mL). The combined organic extracts were washed with brine (100 mL), were dried over anhydrous sodium sulfate, were filtered, and were concentrated under reduced pressure to afford 2,2,2-trichloroethoxycarbonylated L-tryptophan methyl ester. The resulting tryptophan derivative was dissolved in trifluoroacetic acid (200 mL) and stirred at 23 °C. After 40 h, the homogenous solution was poured slowly into a vigorously stirred biphasic mixture of dichloromethane (200 mL) and aqueous sodium carbonate solution (10% w/v, 600 mL). The pH of the mixture was maintained above 7 by the periodic addition of solid sodium carbonate (5 × 50 g). Once the addition was complete, the mixture was extracted with dichloromethane (3 × 400 mL) and the combined organic layers were washed sequentially with water (100 mL) and brine (100 mL). The organic layer was separated, was dried over anhydrous sodium sulfate, was filtered, and was concentrated under reduced pressure. The resulting residue was purified by flash column chromatography on silica gel (eluent: 15→25% acetone in hexanes) to give N1-carboxytrichloroethyl hexahydropyrroloindole (+)-**S4**<sup>5</sup> (10.2 g, 65.9%) as a clear viscous oil. Structural assignments were made using additional information from gCOSY, HSQC, and HMBC experiments.

<sup>1</sup>H NMR (500 MHz, C<sub>6</sub>D<sub>6</sub>, 20 °C):

*Major Rotamer:* δ 6.89 (app-t, *J* = 7.5 Hz, 1H, C<sub>6</sub>H), 6.79–6.75 (m, 1H, C<sub>4</sub>H), 6.61 (app-t, *J* = 7.4 Hz, 1H, C<sub>5</sub>H), 6.25 (d, *J* = 7.7 Hz, 1H, C<sub>7</sub>H), 5.33 (d, *J* = 6.6 Hz, 1H, C<sub>8a</sub>H), 5.17 (br-s, 1H, N<sub>8</sub>H), 4.65 (d, *J* = 11.9 Hz, 1H, N<sub>1</sub>CO<sub>2</sub>CH<sub>a</sub>H<sub>b</sub>CCl<sub>3</sub>), 4.56–4.52 (m, 1H, N<sub>1</sub>CO<sub>2</sub>CH<sub>a</sub>H<sub>b</sub>CCl<sub>3</sub>), 4.38 (d, *J* = 8.7 Hz, 1H, C<sub>2</sub>H), 3.21 (app-t, *J* = 7.1 Hz, 1H, C<sub>3a</sub>H), 2.92 (s, 3H, CO<sub>2</sub>CH<sub>3</sub>), 2.27 (d, *J* = 13.2 Hz, 1H, C<sub>3</sub>H<sub>a</sub>), 1.83–1.74 (m, 1H, C<sub>3</sub>H<sub>b</sub>).

*Minor Rotamer:* δ 6.94 (app-t, *J* = 7.5 Hz, 1H, C<sub>6</sub>H), 6.79–6.75 (m, 1H, C<sub>4</sub>H), 6.64 (app-t, *J* = 7.4 Hz, 1H, C<sub>5</sub>H), 6.49 (d, *J* = 7.7 Hz, 1H, C<sub>7</sub>H), 5.31 (d, *J* =

<sup>5</sup> Due to facile opening of cyclotryptophan **S4** to the corresponding tryptophan derivative this material was used in the next step immediately following purification.

Application of diazene-directed fragment assembly to the enantioselective total synthesis and stereochemical assignment of (+)-desmethyl-*meso*-chimonanthine and related heterodimeric alkaloids.

Stephen P. Lathrop and Mohammad Movassaghi\*

Page S21 / S153

6.6 Hz, 1H, C<sub>8a</sub>H), 4.99 (br-s, 1H, N<sub>8</sub>H), 4.65 (d,  $J$  = 11.9 Hz, 1H, N<sub>1</sub>CO<sub>2</sub>CH<sub>a</sub>H<sub>b</sub>CCl<sub>3</sub>) 4.56–4.52 (m, 1H N<sub>1</sub>CO<sub>2</sub>CH<sub>a</sub>H<sub>b</sub>CCl<sub>3</sub>), 4.50 (d,  $J$  = 8.7 Hz, 1H, C<sub>2</sub>H), 3.29 (app-t,  $J$  = 7.1 Hz, 1H, C<sub>3a</sub>H), 2.89 (s, 3H, CO<sub>2</sub>CH<sub>3</sub>), 2.28 (d,  $J$  = 13.2 Hz, 1H, C<sub>3</sub>H<sub>a</sub>), 1.83–1.74 (m, 1H, C<sub>3</sub>H<sub>b</sub>).

<sup>13</sup>C NMR (125.8 MHz, C<sub>6</sub>D<sub>6</sub>, 20 °C):

*Major Rotamer:* δ 171.5 (CO<sub>2</sub>CH<sub>3</sub>), 153.2 (N<sub>1</sub>CO<sub>2</sub>CH<sub>2</sub>CCl<sub>3</sub>), 150.9 (C<sub>7a</sub>), 129.1 (C<sub>6</sub>), 128.7 (C<sub>4a</sub>), 124.5 (C<sub>4</sub>), 119.2 (C<sub>5</sub>), 109.7 (C<sub>7</sub>), 96.3 (N<sub>1</sub>CO<sub>2</sub>CH<sub>2</sub>CCl<sub>3</sub>), 78.3 (C<sub>8a</sub>), 75.2 (N<sub>1</sub>CO<sub>2</sub>CH<sub>2</sub>CCl<sub>3</sub>), 59.7 (C<sub>2</sub>), 52.1 (CO<sub>2</sub>CH<sub>3</sub>), 45.6 (C<sub>3a</sub>), 34.8 (C<sub>3</sub>).

*Minor Rotamer:* δ 171.2 (CO<sub>2</sub>CH<sub>3</sub>), 152.4 (N<sub>1</sub>CO<sub>2</sub>CH<sub>2</sub>CCl<sub>3</sub>), 150.6 (C<sub>7a</sub>), 129.3 (C<sub>6</sub>), 128.9 (C<sub>4a</sub>), 124.7 (C<sub>4</sub>), 119.8 (C<sub>5</sub>), 109.5 (C<sub>7</sub>), 96.5 (N<sub>1</sub>CO<sub>2</sub>CH<sub>2</sub>CCl<sub>3</sub>), 77.7 (C<sub>8a</sub>), 75.2 (N<sub>1</sub>CO<sub>2</sub>CH<sub>2</sub>CCl<sub>3</sub>), 60.2 (C<sub>2</sub>), 52.1 (CO<sub>2</sub>CH<sub>3</sub>), 46.6 (C<sub>3a</sub>), 34.1 (C<sub>3</sub>).

FTIR (thin film) cm<sup>-1</sup>:

3384 (br-w), 2951 (w), 1718 (s), 1610 (w), 1414 (m).

HRMS (ESI) ( $m/z$ ):

calc'd for C<sub>15</sub>H<sub>16</sub>Cl<sub>3</sub>N<sub>2</sub>O<sub>4</sub> [M+H]<sup>+</sup>: 393.0170, found: 393.0180.

[α]<sub>D</sub><sup>24</sup>:

+168 ( $c$  = 0.58, CH<sub>2</sub>Cl<sub>2</sub>).

TLC (33% acetone in hexanes), R<sub>f</sub>:

0.34 (UV, CAM).

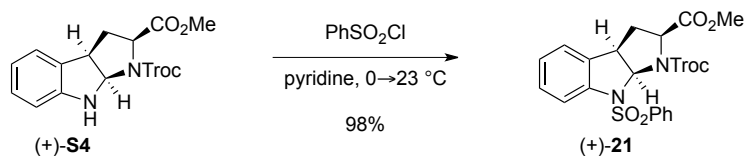

### **C2-Carboxymethyl Hexahydropyrroloindole (+)-21:**

Benzenesulfonyl chloride (6.10 mL, 47.8 mmol, 2.00 equiv) was added dropwise via syringe to a solution of N1-carboxytrichloroethyl hexahydropyrroloindole (+)-**S4** (9.40 g, 23.9 mmol, 1 equiv) in pyridine (40 mL) at 0 °C in an ice bath. After 15 min, the ice bath was removed and allowed to warm to 23 °C. After 15 h, the solution was concentrated under reduced pressure. The resulting residue was diluted with ethyl acetate (750 mL) and washed sequentially with an aqueous solution of hydrochloric acid (1 N, 2 × 50 mL), saturated aqueous solution of sodium bicarbonate (50 mL), and brine (100 mL). The organic layer was separated, was dried over anhydrous sodium sulfate, was filtered, and was concentrated under reduced pressure. The resulting residue was purified by flash column chromatography on silica gel (eluent: 25→50% ethyl acetate in hexanes) to give C2-carboxymethyl hexahydropyrroloindole (+)-**21** (12.5 g, 97.9%) as a white foam.

As a result of the slow conformational equilibration at ambient temperature, NMR spectra were collected at elevated temperature. Structural assignments were made using additional information from gCOSY, HSQC, and HMBC experiments also collected at elevated temperature.

<sup>1</sup>H NMR (500 MHz, CD<sub>3</sub>CN, 70 °C): δ 7.72 (d, *J* = 8.3 Hz, 2H, N<sub>8</sub>SO<sub>2</sub>Ph-*o*-H), 7.57 (t, *J* = 7.8 Hz, 1H, N<sub>8</sub>SO<sub>2</sub>Ph-*p*-H), 7.45–7.40 (m, 3H, C<sub>7</sub>H, N<sub>8</sub>SO<sub>2</sub>Ph-*m*-H), 7.25 (app-t, *J* = 8.3 Hz, 1H, C<sub>6</sub>H), 7.09 (m, 2H, C<sub>4</sub>H, C<sub>5</sub>H), 6.38 (d, *J* = 6.4 Hz, 1H, C<sub>8a</sub>H), 4.86 (d, *J* = 12.1 Hz, 1H, N<sub>1</sub>CO<sub>2</sub>CH<sub>a</sub>H<sub>b</sub>CCl<sub>3</sub>), 4.71 (d, *J* = 10.5 Hz, 1H, N<sub>1</sub>CO<sub>2</sub>CH<sub>a</sub>H<sub>b</sub>CCl<sub>3</sub>), 4.64 (d, *J* = 9.1 Hz, 1H, C<sub>2</sub>H), 3.70 (app-t, *J* = 7.0 Hz, 1H, C<sub>3a</sub>H), 3.15 (s, 3H, CO<sub>2</sub>CH<sub>3</sub>), 2.61 (ddd, *J* = 7.5, 9.1, 13.4 Hz, 1H, C<sub>3</sub>H<sub>a</sub>), 2.52 (d, *J* = 13.4 Hz, 1H, C<sub>3</sub>H<sub>b</sub>).

<sup>13</sup>C NMR (125.8 MHz, CD<sub>3</sub>CN, 70 °C): δ 172.7 (CO<sub>2</sub>CH<sub>3</sub>), 154.0<sup>6</sup> (N<sub>1</sub>CO<sub>2</sub>CH<sub>2</sub>CCl<sub>3</sub>), 144.1 (C<sub>7a</sub>), 140.8 (N<sub>8</sub>SO<sub>2</sub>Ph-*ipso*-C), 135.9 (C<sub>4a</sub>), 135.0 (N<sub>8</sub>SO<sub>2</sub>Ph-*p*-C), 130.8 (N<sub>8</sub>SO<sub>2</sub>Ph-*m*-C), 130.4 (C<sub>6</sub>), 128.9 (N<sub>8</sub>SO<sub>2</sub>Ph-*o*-C), 127.3 (C<sub>5</sub>), 126.4 (C<sub>4</sub>), 120.0 (C<sub>7</sub>), 97.3 (N<sub>1</sub>CO<sub>2</sub>CH<sub>2</sub>CCl<sub>3</sub>), 82.9 (C<sub>8a</sub>), 76.7 (N<sub>1</sub>CO<sub>2</sub>CH<sub>2</sub>CCl<sub>3</sub>), 61.1 (C<sub>2</sub>), 53.2 (CO<sub>2</sub>CH<sub>3</sub>), 47.1 (C<sub>3a</sub>), 35.2 (C<sub>3</sub>).

FTIR (thin film) cm<sup>-1</sup>: 2952 (w), 1731 (s), 1404 (m), 1357 (m), 1170 (m).

<sup>6</sup> Not observed directly in simple <sup>13</sup>C NMR. Assigned based on HMBC correlation to NCO<sub>2</sub>CH<sub>a</sub>H<sub>b</sub>CCl<sub>3</sub>.

Application of diazene-directed fragment assembly to the enantioselective total synthesis and stereochemical assignment of (+)-desmethyl-*meso*-chimonanthine and related heterodimeric alkaloids.

Stephen P. Lathrop and Mohammad Movassaghi\*

Page S23 / S153

HRMS (ESI) ( $m/z$ ): calc'd for  $C_{21}H_{20}Cl_3N_2O_6S$   $[M+H]^+$ : 533.0102,  
found: 533.0107.

$[\alpha]_D^{24}$ : +93 ( $c = 0.41$ ,  $CH_2Cl_2$ ).

TLC (50% ethyl acetate in hexanes),  $R_f$ : 0.47 (UV, CAM).

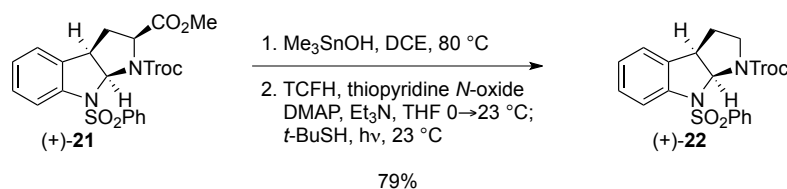

### N8-Benzenesulfonyl Hexahydropyrroloindole (+)-22:

Trimethyltin hydroxide<sup>7</sup> (9.50 g, 52.5 mmol, 8.00 equiv) was added to a solution of C2-carboxymethyl hexahydropyrroloindole (+)-**21** (3.50 g, 6.55 mmol, 1 equiv) in dichloroethane (65 mL) at 23 °C. The reaction flask was fitted with a reflux condenser and heated to 80 °C. After 48 h, the heterogeneous mixture was allowed to cool to 23 °C and was concentrated under reduced pressure. The resulting residue was diluted with ethyl acetate (600 mL) and was washed with aqueous hydrochloric acid solution (1 N, 3 × 100 mL), brine (50 mL), the organic layer was separated, was dried over anhydrous sodium sulfate, was filtered and was concentrated under reduced pressure. The resulting residue was filtered through a pad of silica gel (eluent: 5% methanol in dichloromethane→5% acetic acid in dichloromethane) to remove excess trimethyltin hydroxide. The filtrate was concentrated under reduced pressure to provide the crude carboxylic acid.

Thiopyridine *N*-oxide (1.33 g, 10.5 mmol, 1.60 equiv), 4-(dimethylamino)pyridine (80.0 mg, 650 μmol, 0.100 equiv), and *N,N,N',N'*-tetramethylchloroformamidinium hexafluorophosphate (TCFH, 2.75 g, 9.81 mmol, 1.50 equiv) were sequentially added to a solution of the crude carboxylic acid in tetrahydrofuran (65 mL) at 0 °C in an ice bath. The reaction flask was removed from the ice bath, covered in aluminum foil, and triethylamine (3.65 mL, 26.2 mmol, 4.00 equiv) was added while the reaction mixture was still cold. After 1.5 h, *tert*-butylthiol (3.70 mL, 32.7 mmol, 5.00 equiv) was added via syringe and the aluminum foil was removed from the flask. The resulting suspension was irradiated with a flood lamp (500 W). After 2 h, the lamp was turned off and the tetrahydrofuran was removed under reduced pressure. The resulting residue was diluted with dichloromethane (200 mL) and was washed with aqueous saturated sodium bicarbonate solution (50 mL). The aqueous layer was extracted with dichloromethane (2 × 100 mL). The combined organic extracts were washed with brine (50 mL), were dried over anhydrous sodium sulfate, were filtered, and were concentrated under reduced pressure. The resulting residue was purified by flash column chromatography on silica gel (eluent: gradient, 10→33% ethyl acetate in hexanes) to give N8-benzenesulfonyl hexahydropyrroloindole (+)-**22** (2.47 g, 79.3%, overall from (+)-**21**) as a white foam.

As a result of the slow conformational equilibration at ambient temperature, NMR spectra were collected at elevated temperature. Structural assignments were made using additional information from gCOSY, HSQC, and HMBC experiments also collected at elevated temperature.

<sup>1</sup>H NMR (500 MHz, CD<sub>3</sub>CN, 70 °C): δ 7.74 (d, *J* = 7.8 Hz, 2H, N<sub>8</sub>SO<sub>2</sub>Ph-*o*-H), 7.59 (t, *J* = 7.5 Hz, 1H, N<sub>8</sub>SO<sub>2</sub>Ph-*p*-H) 7.52 (d, *J* = 8.1 Hz, 1H, C<sub>7</sub>H) 7.45 (t, *J* = 7.3 Hz, 2H, N<sub>8</sub>SO<sub>2</sub>Ph-*m*-H),

<sup>7</sup> All operations involving trimethyltin hydroxide were carried out in a well-ventilated fume hood. This includes but is not limited to: measuring out the reagent, execution of the transformation, work-up of the reaction mixture, and concentration of the crude reaction mixture.



Application of diazene-directed fragment assembly to the enantioselective total synthesis and stereochemical assignment of (+)-desmethyl-*meso*-chimonanthine and related heterodimeric alkaloids.

Stephen P. Lathrop and Mohammad Movassaghi\*

Page S25 / S153

7.27 (app-t,  $J = 7.3$  Hz, 1H, C<sub>6</sub>H), 7.18–7.12 (m, 2H, C<sub>4</sub>H, C<sub>5</sub>H), 6.34 (d,  $J = 6.7$  Hz, 1H, C<sub>8a</sub>H), 4.90–4.82 (m, 2H, N<sub>1</sub>CO<sub>2</sub>CH<sub>2</sub>CCl<sub>3</sub>), 3.85 (dd,  $J = 8.3$ , 10.6 Hz, 1H, C<sub>2</sub>H<sub>a</sub>), 3.73 (app-t,  $J = 7.1$  Hz, 1H, C<sub>3a</sub>H), 2.85 (app-dt,  $J = 5.7$ , 11.4 Hz, 1H, C<sub>2</sub>H<sub>b</sub>), 2.23–2.14 (m, 1H, C<sub>3</sub>H<sub>a</sub>), 2.04 (dd,  $J = 5.6$ , 12.7 Hz, 1H, C<sub>3</sub>H<sub>b</sub>).

<sup>13</sup>C NMR (125.8 MHz, CD<sub>3</sub>CN, 70 °C): δ 154.3 (N<sub>1</sub>CO<sub>2</sub>CH<sub>2</sub>CCl<sub>3</sub>), 143.7 (C<sub>7a</sub>), 140.4 (N<sub>8</sub>SO<sub>2</sub>Ph-*ipso*-C), 135.8 (C<sub>4a</sub>), 135.1 (NSO<sub>2</sub>Ph-*p*-C), 130.9 (N<sub>8</sub>SO<sub>2</sub>Ph-*m*-C), 130.2 (C<sub>6</sub>), 129.0 (N<sub>8</sub>SO<sub>2</sub>Ph-*o*-C), 127.3 (C<sub>5</sub>), 126.4 (C<sub>4</sub>), 119.0 (C<sub>7</sub>), 97.7 (N<sub>1</sub>CO<sub>2</sub>CH<sub>2</sub>CCl<sub>3</sub>), 82.1 (C<sub>8a</sub>), 76.6 (N<sub>1</sub>CO<sub>2</sub>CH<sub>2</sub>CCl<sub>3</sub>), 47.6 (C<sub>3a</sub>), 46.9 (C<sub>2</sub>), 37.3 (C<sub>3</sub>).

FTIR (thin film) cm<sup>-1</sup>: 2952 (w), 1728 (s), 1407 (m), 1358 (m), 1173 (m).

HRMS (ESI) ( $m/z$ ): calc'd for C<sub>19</sub>H<sub>18</sub>Cl<sub>3</sub>N<sub>2</sub>O<sub>4</sub>S [M+H]<sup>+</sup>: 475.0047, found: 475.0051.

[α]<sub>D</sub><sup>24</sup>: +183 ( $c = 0.43$ , CH<sub>2</sub>Cl<sub>2</sub>).

TLC (50% ethyl acetate in hexanes), R<sub>f</sub>: 0.58 (UV, CAM).

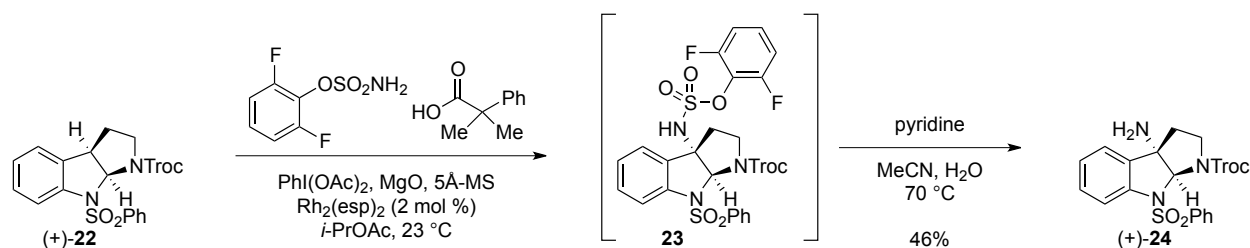

### C3a-Aminohexahydropyrroloindole (+)-**24**:

A round bottom flask was charged with 5 Å molecular sieves (210 mg, 200 mg/mmol of **22**), magnesium oxide (169 mg, 4.20 mmol, 4.00 equiv) and flame-dried under vacuum. The reaction vessel was allowed to cool to 23 °C and back filled with argon. Solid 2,6-difluorophenyl sulfamate<sup>4</sup> (287 mg, 1.37 mmol, 1.30 equiv), 2-methyl-2-phenylpropionic acid (86.0 mg, 526 μmol, 0.500 equiv), and  $\text{Rh}_2(\text{esp})_2$  (16.0 mg, 21.0 μmol, 0.0200 equiv) were added sequentially. A solution of N8-benzenesulfonyl hexahydropyrroloindole (+)-**22** (500 mg, 1.05 mmol, 1 equiv) in isopropyl acetate (2.0 mL) was added at 23 °C and the mixture was allowed to stir. After 5 min, (diacetoxyiodo)benzene (676 mg, 2.10 mmol, 2.00 equiv) was added and the green heterogeneous mixture was vigorously agitated with stirring at 23 °C. After 24 h, the reaction mixture was filtered through a pad of Celite and the filter cake was rinsed with ethyl acetate (40 mL). The filtrate was concentrated under reduced pressure. The residue was diluted with dichloromethane (50 mL) and washed with a saturated solution of sodium thiosulfate (10 mL). The aqueous layer was then extracted with dichloromethane (2 × 30 mL). The combined organic extracts were washed with brine (25 mL), were dried over anhydrous sodium sulfate, were filtered, and were concentrated under reduced pressure.

The resulting crude aryl sulfamate ester **23** was dissolved in a mixture of acetonitrile–water (2:1, 21 mL). Pyridine (1.70 mL, 21.0 mmol, 20.0 equiv) was added via syringe at 23 °C. The reaction flask was fitted with a reflux condenser and heated to 70 °C. After 24 h, the resulting dark brown solution was allowed to cool to 23 °C. The mixture was diluted with dichloromethane (50 mL) and was washed with a saturated aqueous solution of sodium bicarbonate (20 mL). The aqueous layer was extracted with dichloromethane (2 × 30 mL). The combined organic extracts were washed with brine (25 mL), were dried over anhydrous sodium sulfate, were filtered, and were concentrated under reduced pressure. The resulting residue was purified by flash column chromatography on silica gel (eluent: gradient, 15 → 33% acetone in hexane) to afford the C3a-aminohexahydropyrroloindole (+)-**24** (235 mg, 45.7%, overall from (+)-**22**) as an orange foam.

As a result of the slow conformational equilibration at ambient temperature, NMR spectra were collected at elevated temperature. Structural assignments were made using additional information from gCOSY, HSQC, and HMBC experiments also collected at elevated temperature.

<sup>1</sup>H NMR (500 MHz,  $\text{CD}_3\text{CN}$ , 70 °C):

δ 7.86 (d,  $J$  = 7.9 Hz, 2H,  $\text{N}_8\text{SO}_2\text{Ph-}o\text{-H}$ ), 7.61 (t,  $J$  = 7.8 Hz, 1H,  $\text{N}_8\text{SO}_2\text{Ph-}p\text{-H}$ ), 7.55 (d,  $J$  = 8.1 Hz, 1H,  $\text{C}_7\text{H}$ ), 7.49 (t,  $J$  = 7.4 Hz, 2H,  $\text{N}_8\text{SO}_2\text{Ph-}m\text{-H}$ ), 7.35–7.31 (m, 2H,  $\text{C}_6\text{H}$ ,  $\text{C}_4\text{H}$ ), 7.18 (app-t,  $J$  = 7.5 Hz, 1H,  $\text{C}_5\text{H}$ ), 5.82 (s, 1H,  $\text{C}_{8a}\text{H}$ ), 4.88 (br-s, 1H,  $\text{N}_1\text{CO}_2\text{CH}_a\text{H}_b\text{CCl}_3$ ), 4.81 (d,  $J$  = 10.9 Hz, 1H,

Application of diazene-directed fragment assembly to the enantioselective total synthesis and stereochemical assignment of (+)-desmethyl-*meso*-chimonanthine and related heterodimeric alkaloids.

Stephen P. Lathrop and Mohammad Movassaghi\*

Page S27 / S153

$\text{N}_1\text{CO}_2\text{CH}_a\text{H}_b\text{CCl}_3$ ), 3.90 (app-t,  $J = 9.5$  Hz, 1H,  $\text{C}_2\text{H}_a$ ), 2.91 (app-dt,  $J = 6.0, 11.1$  Hz, 1H,  $\text{C}_2\text{H}_b$ ), 2.19 (dd,  $J = 6.0, 12.5$  Hz, 1H,  $\text{C}_3\text{H}_a$ ), 2.11 (app-dt,  $J = 8.0, 11.4$  Hz, 1H,  $\text{C}_3\text{H}_b$ ) 1.47 (br-s, 2H,  $\text{NH}_2$ ).

$^{13}\text{C}$  NMR (125.8 MHz,  $\text{CD}_3\text{CN}$ , 70 °C):  $\delta$  154.6 ( $\text{N}_1\text{CO}_2\text{CH}_2\text{CCl}_3$ ), 143.2 ( $\text{C}_{7a}$ ), 140.5 ( $\text{N}_8\text{SO}_2\text{Ph-}i\text{ps}o\text{-C}$ ), 137.9 ( $\text{C}_{4a}$ ), 135.3 ( $\text{N}_8\text{SO}_2\text{Ph-}p\text{-C}$ ), 131.3 ( $\text{C}_6$ ), 131.0 ( $\text{N}_8\text{SO}_2\text{Ph-}m\text{-C}$ ), 129.2 ( $\text{N}_8\text{SO}_2\text{Ph-}o\text{-C}$ ), 127.2 ( $\text{C}_5$ ), 125.8 ( $\text{C}_4$ ), 118.3 ( $\text{C}_7$ ), 97.7 ( $\text{N}_1\text{CO}_2\text{CH}_2\text{CCl}_3$ ), 88.5 ( $\text{C}_{8a}$ ), 76.6 ( $\text{N}_1\text{CO}_2\text{CH}_2\text{CCl}_3$ ), 71.8 ( $\text{C}_{3a}$ ), 47.8 ( $\text{C}_2$ ), 40.8 ( $\text{C}_3$ ).

FTIR (thin film)  $\text{cm}^{-1}$ : 2953 (w), 1733 (s), 1407 (m), 1361 (m), 1171 (w).

HRMS (ESI) ( $m/z$ ): calc'd for  $\text{C}_{19}\text{H}_{19}\text{Cl}_3\text{N}_3\text{O}_4\text{S}$   $[\text{M}+\text{H}]^+$ : 490.0156, found: 490.0139.

$[\alpha]_D^{24}$ : +164 ( $c = 0.48$ ,  $\text{CH}_2\text{Cl}_2$ ).

TLC (33% acetone in hexanes),  $R_f$ : 0.16 (UV, CAM).

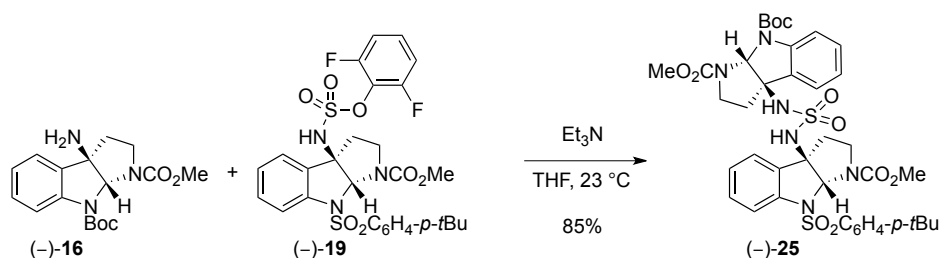

### Mixed Sulfamide (-)-25:

Triethylamine (82.0  $\mu$ L, 587  $\mu$ mol, 2.20 equiv) was added via syringe to a solution of C3a-aminohexahydropyrroloindole (-)-16 (89.0 mg, 267  $\mu$ mol, 1 equiv) and hexahydropyrroloindole sulfamate ester (-)-19 (200 mg, 320  $\mu$ mol, 1.20 equiv) in tetrahydrofuran (2.00 mL) at 23 °C. After 24 h, the clear solution was concentrated under reduced pressure. The resulting residue was purified by flash column chromatography on silica gel (eluent: 33% ethyl acetate in hexanes then 25% acetone in hexanes) to afford the mixed sulfamide (-)-25 (187 mg, 84.9%) as a white solid.

As a result of the slow conformational equilibration at ambient temperature, NMR spectra were collected at elevated temperature. Structural assignments were made using additional information from gCOSY, HSQC, and HMBC experiments also collected at elevated temperature.

<sup>1</sup>H NMR (500 MHz, C<sub>6</sub>D<sub>6</sub>, 70 °C):

$\delta$  8.05 (d,  $J$  = 8.2 Hz, 1H, C<sub>7</sub>H), 7.94 (br-s, 2H, N<sub>8</sub>SO<sub>2</sub>Ar-*o*-H), 7.74 (d,  $J$  = 8.1 Hz, 1H, C<sub>7</sub>H), 7.14 (d,  $J$  = 8.5 Hz, 2H, N<sub>8</sub>SO<sub>2</sub>Ar-*m*-H), 7.08–7.00 (m, 2H, C<sub>6</sub>H, C<sub>6</sub>H), 6.95 (d,  $J$  = 5.6 Hz, 1H, C<sub>4</sub>H), 6.91 (s, 1H, C<sub>8a</sub>H), 6.73 (app-t,  $J$  = 7.5 Hz, 1H, C<sub>5</sub>H), 6.66 (d,  $J$  = 6.6 Hz, 1H, C<sub>4</sub>H), 6.61 (s, 1H, C<sub>8a</sub>H), 6.53 (br-s, 1H, C<sub>5</sub>H), 5.15 (br-s, 1H, SO<sub>2</sub>NH), 3.84 (br-s, 1H, SO<sub>2</sub>NH), 3.80–3.67 (m, 2H, C<sub>2</sub>H<sub>a</sub>, C<sub>2</sub>H<sub>a</sub>), 3.51 (s, 3H, N<sub>1</sub>CO<sub>2</sub>CH<sub>3</sub>), 3.44 (s, 3H, N<sub>1</sub>CO<sub>2</sub>CH<sub>3</sub>), 2.66–2.54 (m, 3H, C<sub>2</sub>H<sub>b</sub>, C<sub>2</sub>H<sub>b</sub>, C<sub>3</sub>H<sub>a</sub>), 2.14–2.07 (m, 2H, C<sub>3</sub>H<sub>a</sub>, C<sub>3</sub>H<sub>b</sub>), 1.79 (d,  $J$  = 7.1 Hz, 1H, C<sub>3</sub>H<sub>b</sub>), 1.58 (s, 9H, N<sub>1</sub>CO<sub>2</sub>C(CH<sub>3</sub>)<sub>3</sub>), 1.04 (s, 9H, C(CH<sub>3</sub>)<sub>3</sub>).

<sup>13</sup>C NMR (125.8 MHz, C<sub>6</sub>D<sub>6</sub>, 70 °C):

$\delta$  157.5 (N<sub>8</sub>SO<sub>2</sub>Ar-*p*-C), 155.7 (N<sub>1</sub>CO<sub>2</sub>CH<sub>3</sub>), 155.5 (N<sub>1</sub>CO<sub>2</sub>CH<sub>3</sub>), 153.3 (N<sub>8</sub>CO<sub>2</sub>C(CH<sub>3</sub>)<sub>3</sub>), 145.5 (C<sub>7a</sub>'), 143.3 (C<sub>7a</sub>'), 138.2 (N<sub>8</sub>SO<sub>2</sub>Ar-*ipso*-C), 132.8 (C<sub>4a</sub>'), 130.9 (C<sub>6</sub>'), 130.8 (C<sub>6</sub>'), 129.5 (C<sub>4a</sub>'), 128.0 (N<sub>8</sub>SO<sub>2</sub>Ar-*o*-C), 126.7 (N<sub>8</sub>SO<sub>2</sub>Ar-*m*-C), 125.3 (C<sub>5</sub>'), 124.8 (C<sub>4</sub>'), 124.5 (C<sub>4</sub>'), 123.5 (C<sub>5</sub>'), 118.4 (C<sub>7</sub>'), 117.5 (C<sub>7</sub>'), 82.5 (C<sub>8a</sub>'), 82.0 (N<sub>8</sub>CO<sub>2</sub>C(CH<sub>3</sub>)<sub>3</sub>), 81.6 (C<sub>8a</sub>'), 72.9 (C<sub>3a</sub>'), 72.0 (C<sub>3a</sub>'), 52.9 (N<sub>1</sub>CO<sub>2</sub>CH<sub>3</sub>), 52.6 (N<sub>1</sub>CO<sub>2</sub>CH<sub>3</sub>), 45.4 (C<sub>2</sub>'), 45.2 (C<sub>2</sub>'), 37.8 (C<sub>3</sub>'), 37.3 (C<sub>3</sub>'), 35.4 (C(CH<sub>3</sub>)<sub>3</sub>), 31.3 (C(CH<sub>3</sub>)<sub>3</sub>), 28.8 (N<sub>8</sub>CO<sub>2</sub>C(CH<sub>3</sub>)<sub>3</sub>).

Application of diazene-directed fragment assembly to the enantioselective total synthesis and stereochemical assignment of (+)-desmethyl-*meso*-chimonanthine and related heterodimeric alkaloids.

Stephen P. Lathrop and Mohammad Movassaghi\*

Page S29 / S153

FTIR (thin film)  $\text{cm}^{-1}$ : 3242 (br-m), 2960 (m), 1713 (s), 1480 (m), 1448 (m), 1392 (m), 1167 (w).

HRMS (ESI) ( $m/z$ ): calc'd for  $\text{C}_{39}\text{H}_{48}\text{N}_6\text{NaO}_{10}\text{S}_2$   $[\text{M}+\text{Na}]^+$ : 847.2766, found: 847.2767.

$[\alpha]_{\text{D}}^{24}$ :  $-111$  ( $c = 0.66$ ,  $\text{CH}_2\text{Cl}_2$ ).

TLC (33% acetone in hexanes),  $R_f$ : 0.25 (UV, CAM).

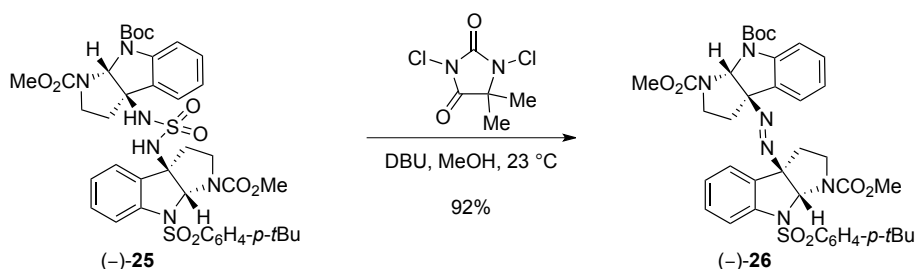

### Unsymmetrical Diazene (–)-26:

1,8-Diazabicyclo[5.4.0]undec-7-ene (DBU, 152  $\mu\text{L}$ , 1.02 mmol, 5.00 equiv), was added via syringe to a solution of mixed sulfamide (–)-25 (169 mg, 205  $\mu\text{mol}$ , 1 equiv) in methanol (15.0 mL) at 23  $^\circ\text{C}$ . After 5 min, a solution of 1,3-dichloro-5,5-dimethylhydantoin (101 mg, 513  $\mu\text{mol}$ , 2.50 equiv) in methanol (5.00 mL) was added via syringe over 1 min at 23  $^\circ\text{C}$ . After 30 min, the clear solution was concentrated under reduced pressure. The resulting residue was purified by flash column chromatography on silica gel (eluent: 10 $\rightarrow$ 20% acetone in hexanes) to afford unsymmetrical diazene (–)-26 (143 mg, 91.9%) as a white foam.

As a result of the slow conformational equilibration at ambient temperature, NMR spectra were collected at elevated temperature. Structural assignments were made using additional information from gCOSY, HSQC, and HMBC experiments also collected at elevated temperature.

$^1\text{H}$  NMR (500 MHz,  $\text{CD}_3\text{CN}$ , 50  $^\circ\text{C}$ ):

$\delta$  7.72 (d,  $J$  = 8.5 Hz, 2H,  $\text{N}_8\text{SO}_2\text{Ar-}o\text{-H}$ ), 7.68 (d,  $J$  = 8.2 Hz, 1H,  $\text{C}_7\text{H}$ ), 7.50 (d,  $J$  = 8.2 Hz, 1H,  $\text{C}_7\text{H}$ ), 7.46 (d,  $J$  = 8.5 Hz, 2H,  $\text{N}_8\text{SO}_2\text{Ar-}m\text{-H}$ ), 7.35–7.29 (m, 2H,  $\text{C}_6\text{H}$ ,  $\text{C}_6\text{H}$ ), 7.13–6.97 (m, 4H,  $\text{C}_4\text{H}$ ,  $\text{C}_4\text{H}$ ,  $\text{C}_5\text{H}$ ,  $\text{C}_5\text{H}$ ), 6.64 (s, 1H,  $\text{C}_{8a}\text{H}$ ), 6.51 (s, 1H,  $\text{C}_{8a}\text{H}$ ), 3.92–3.85 (m, 2H,  $\text{C}_2\text{H}_a$ ,  $\text{C}_2\text{H}_a$ ), 3.69 (s, 3H,  $\text{N}_1\text{CO}_2\text{CH}_3$ ), 3.66 (s, 3H,  $\text{N}_1\text{CO}_2\text{CH}_3$ ), 3.00–2.90 (m, 2H,  $\text{C}_2\text{H}_b$ ,  $\text{C}_2\text{H}_b$ ), 2.28 (app-t,  $J$  = 5.1 Hz, 1H,  $\text{C}_3\text{H}_a$ ), 2.26 (app-t,  $J$  = 5.1 Hz, 1H,  $\text{C}_3\text{H}_a$ ), 2.18 (app-dt,  $J$  = 8.0, 11.9 Hz, 1H,  $\text{C}_3\text{H}_b$ ), 2.10 (app-dt,  $J$  = 8.2, 12.3 Hz, 1H,  $\text{C}_3\text{H}_b$ ), 1.54 (s, 9H,  $\text{N}_1\text{CO}_2\text{C}(\text{CH}_3)_3$ ), 1.26 (s, 9H,  $\text{C}(\text{CH}_3)_3$ ).

$^{13}\text{C}$  NMR (125.8 MHz,  $\text{CD}_3\text{CN}$ , 50  $^\circ\text{C}$ ):

$\delta$  159.0 ( $\text{N}_8\text{SO}_2\text{Ar-}p\text{-C}$ ), 156.6 ( $\text{N}_1\text{CO}_2\text{CH}_3$ ), 156.2 ( $\text{N}_1\text{CO}_2\text{CH}_3$ ), 153.8 ( $\text{N}_8\text{CO}_2\text{C}(\text{CH}_3)_3$ ), 145.3 ( $\text{C}_{7a}$ ), 144.0 ( $\text{C}_{7a}$ ), 137.5 ( $\text{N}_8\text{SO}_2\text{Ar-}ipso\text{-C}$ ), 131.9 ( $\text{C}_6$ ), 131.7 ( $\text{C}_6'$ ), 131.4 ( $\text{C}_{4a}$ ), 130.6 ( $\text{C}_{4a}'$ ), 129.0 ( $\text{N}_8\text{SO}_2\text{Ar-}o\text{-C}$ ), 127.7 ( $\text{N}_8\text{SO}_2\text{Ar-}m\text{-C}$ ), 127.0 ( $\text{C}_4$ ), 126.4 ( $\text{C}_5$ ), 126.3 ( $\text{C}_4'$ ), 125.1 ( $\text{C}_5'$ ), 118.2 ( $\text{C}_7'$ ), 117.4 ( $\text{C}_7$ ), 90.6 ( $\text{C}_{3a}$ ), 89.9 ( $\text{C}_{3a}'$ ), 83.2 ( $\text{N}_8\text{CO}_2\text{C}(\text{CH}_3)_3$ ), 83.0 ( $\text{C}_{8a}$ ), 80.0 ( $\text{C}_{8a}'$ ), 53.8 ( $\text{N}_1\text{CO}_2\text{CH}_3$ ), 53.7 ( $\text{N}_1\text{CO}_2\text{CH}_3$ ), 47.1 ( $\text{C}_2'$ ), 46.9 ( $\text{C}_2$ ), 37.3 ( $\text{C}_3$ ), 36.5 ( $\text{C}(\text{CH}_3)_3$ ), 35.9 ( $\text{C}_3'$ ), 31.9 ( $\text{C}(\text{CH}_3)_3$ ), 29.2 ( $\text{N}_8\text{CO}_2\text{C}(\text{CH}_3)_3$ ).

Application of diazene-directed fragment assembly to the enantioselective total synthesis and stereochemical assignment of (+)-desmethyl-*meso*-chimonanthine and related heterodimeric alkaloids.  
Stephen P. Lathrop and Mohammad Movassaghi\*

Page S31 / S153

|                                       |                                                                                                                             |
|---------------------------------------|-----------------------------------------------------------------------------------------------------------------------------|
| FTIR (thin film) $\text{cm}^{-1}$ :   | 2960 (m), 1712 (s), 1597 (w), 1447 (m), 1391 (s), 1171 (m).                                                                 |
| HRMS (ESI) ( $m/z$ ):                 | calc'd for $\text{C}_{39}\text{H}_{46}\text{N}_6\text{NaO}_8\text{S}$ $[\text{M}+\text{Na}]^+$ : 781.2990, found: 781.2997. |
| $[\alpha]_{\text{D}}^{24}$ :          | $-226$ ( $c = 1.03$ , $\text{CH}_2\text{Cl}_2$ ).                                                                           |
| TLC (33% acetone in hexanes), $R_f$ : | 0.50 (UV, CAM).                                                                                                             |

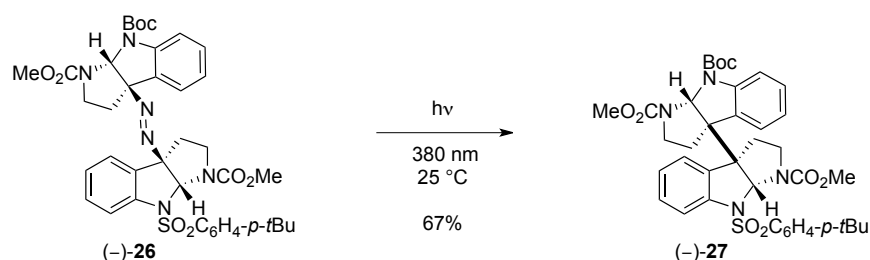

### Heterodimer (-)-27:

A solution of unsymmetrical diazene (-)-**26** (132 mg, 174  $\mu\text{mol}$ , 1 equiv) in dichloromethane (30 mL) was concentrated under reduced pressure in a 100 mL round bottom flask to provide a thin film of diazene (-)-**26** coating the flask. The flask was back filled with argon and irradiated in a Rayonet photoreactor equipped with 16 radially distributed ( $r=12.7$  cm) 25 W lamps ( $\lambda=380$  nm) at 25  $^\circ\text{C}$ . After 12 h, the lamps were turned off and the resulting residue was purified by flash column chromatography on silica gel (eluent: 10 $\rightarrow$ 20% acetone in hexanes) to afford the heterodimer (-)-**27** (85.0 mg, 66.8%) as a white foam.

As a result of the slow conformational equilibration at ambient temperature, NMR spectra were collected at elevated temperature. Structural assignments were made using additional information from gCOSY, HSQC, and HMBC experiments also collected at elevated temperature.

$^1\text{H}$  NMR (500 MHz,  $\text{CD}_3\text{CN}$ , 75  $^\circ\text{C}$ ):

$\delta$  7.85 (d,  $J = 8.5$  Hz, 2H,  $\text{N}_8\text{SO}_2\text{Ar-}o\text{-H}$ ), 7.62 (d,  $J = 8.5$  Hz, 2H,  $\text{N}_8\text{SO}_2\text{Ar-}m\text{-H}$ ), 7.58 (d,  $J = 8.2$  Hz, 1H,  $\text{C}_7\text{H}$ ), 7.44 (d,  $J = 8.2$  Hz, 1H,  $\text{C}_7\text{H}$ ), 7.25–7.13 (m, 4H,  $\text{C}_6\text{H}$ ,  $\text{C}_6'\text{H}$ ,  $\text{C}_4\text{H}$ ,  $\text{C}_4'\text{H}$ ), 6.97 (app-t,  $J = 7.7$  Hz, 1H,  $\text{C}_5\text{H}$ ), 6.88 (app-t,  $J = 7.6$  Hz, 1H,  $\text{C}_5\text{H}$ ), 6.35 (s, 1H,  $\text{C}_{8a}\text{H}$ ), 6.24 (s, 1H,  $\text{C}_{8a}'\text{H}$ ), 3.87 (dd,  $J = 7.6$ , 11.5 Hz, 1H,  $\text{C}_2\text{H}_a$ ), 3.76 (dd,  $J = 7.6$ , 10.9 Hz, 1H,  $\text{C}_2\text{H}_a$ ), 3.66 (s, 3H,  $\text{N}_1\text{CO}_2\text{CH}_3$ ), 3.53 (s, 3H,  $\text{N}_1\text{CO}_2\text{CH}_3$ ), 2.70–2.62 (m, 2H,  $\text{C}_2\text{H}_b$ ,  $\text{C}_2'\text{H}_b$ ), 2.25 (app-dt,  $J = 7.7$ , 12.2 Hz, 1H,  $\text{C}_3\text{H}_a$ ), 2.13 (dd,  $J = 7.7$ , 12.0 Hz, 1H,  $\text{C}_3\text{H}_a$ ), 2.08–2.01 (m, 2H,  $\text{C}_3\text{H}_b$ ,  $\text{C}_3'\text{H}_b$ ), 1.60 (s, 9H,  $\text{N}_1\text{CO}_2\text{C}(\text{CH}_3)_3$ ), 1.36 (s, 9H,  $\text{C}(\text{CH}_3)_3$ ).

$^{13}\text{C}$  NMR (125.8 MHz,  $\text{CD}_3\text{CN}$ , 70  $^\circ\text{C}$ ):

$\delta$  159.1 ( $\text{N}_8\text{SO}_2\text{Ar-}p\text{-C}$ ), 156.6 ( $\text{N}_1\text{CO}_2\text{CH}_3$ ), 156.1 ( $\text{N}_1\text{CO}_2\text{CH}_3$ ), 153.7 ( $\text{N}_8\text{CO}_2\text{C}(\text{CH}_3)_3$ ), 145.3 ( $\text{C}_{7a}'$ ), 144.8 ( $\text{C}_{7a}$ ), 140.1 ( $\text{N}_8\text{SO}_2\text{Ar-}ipso\text{-C}$ ), 133.4 ( $\text{C}_{4a}'$ ), 133.1 ( $\text{C}_{4a}$ ), 131.0 ( $\text{C}_6$ ), 130.7 ( $\text{C}_6'$ ), 128.1 ( $\text{N}_8\text{SO}_2\text{Ar-}m\text{-C}$ ), 128.0 ( $\text{N}_8\text{SO}_2\text{Ar-}o\text{-C}$ ), 126.2 ( $\text{C}_4$ ), 125.9 ( $\text{C}_4'$ ), 125.1 ( $\text{C}_5$ ), 124.9 ( $\text{C}_5'$ ), 117.8 ( $\text{C}_7'$ ), 115.6 ( $\text{C}_7$ ), 83.5 ( $\text{N}_8\text{CO}_2\text{C}(\text{CH}_3)_3$ ), 83.3 ( $\text{C}_{8a}$ ), 81.1 ( $\text{C}_{8a}'$ ), 64.2 ( $\text{C}_{3a}$ ), 63.2 ( $\text{C}_{3a}'$ ), 54.0 ( $\text{N}_1\text{CO}_2\text{CH}_3$ ), 53.9 ( $\text{N}_1\text{CO}_2\text{CH}_3$ ), 46.9 ( $\text{C}_2$ ), 46.6 ( $\text{C}_2'$ ), 37.5 ( $\text{C}_3$ ),



Application of diazene-directed fragment assembly to the enantioselective total synthesis and stereochemical assignment of (+)-desmethyl-*meso*-chimonanthine and related heterodimeric alkaloids.  
Stephen P. Lathrop and Mohammad Movassaghi\*

Page S33 / S153

36.7 (C(CH<sub>3</sub>)<sub>3</sub>), 35.6 (C<sub>3'</sub>), 32.1 (C(CH<sub>3</sub>)<sub>3</sub>), 29.5 (N<sub>8</sub>-CO<sub>2</sub>C(CH<sub>3</sub>)<sub>3</sub>).

FTIR (thin film) cm<sup>-1</sup>: 2957 (w), 1711 (s), 1596 (w), 1479 (m), 1391 (w), 1366 (w), 1166 (w).

HRMS (ESI) (*m/z*): calc'd for C<sub>39</sub>H<sub>46</sub>N<sub>4</sub>NaO<sub>8</sub>S [M+Na]<sup>+</sup>: 753.2929, found: 753.2927.

[α]<sub>D</sub><sup>24</sup>: -162 (*c* = 0.13, CH<sub>2</sub>Cl<sub>2</sub>).

TLC (33% acetone in hexanes), R<sub>f</sub>: 0.37 (UV, CAM).

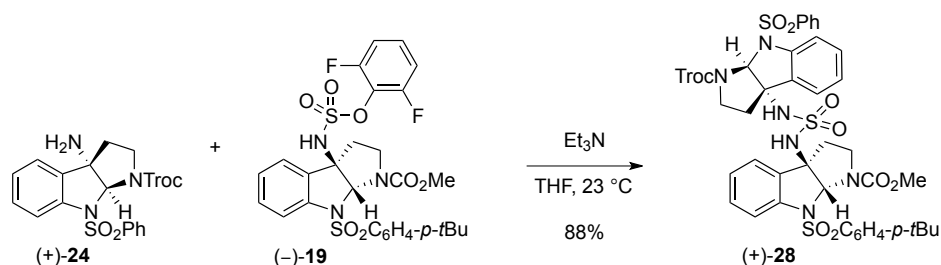

### Mixed Sulfamide (+)-28:

Triethylamine (206  $\mu\text{L}$ , 1.47 mmol, 2.20 equiv) was added via syringe to a solution of C3a-aminohexahydropyrroloindole (+)-24 (328 mg, 670  $\mu\text{mol}$ , 1 equiv) and hexahydropyrroloindole sulfamate ester (-)-19 (500 mg, 804  $\mu\text{mol}$ , 1.20 equiv) in tetrahydrofuran (3.50 mL) at 23  $^\circ\text{C}$ . After 24 h, the clear solution was concentrated under reduced pressure. The resulting residue was purified by flash column chromatography on silica gel (eluent: 20 $\rightarrow$ 33% acetone in hexanes) to afford the mixed sulfamide (+)-28 (581 mg, 88.3%) as a white solid.

As a result of the slow conformational equilibration at ambient temperature, NMR spectra were collected at elevated temperature. Structural assignments were made using additional information from gCOSY, HSQC, and HMBC experiments also collected at elevated temperature.

$^1\text{H}$  NMR (500 MHz,  $\text{C}_6\text{D}_6$ , 70  $^\circ\text{C}$ ):

$\delta$  8.04 (br-s, 2H,  $\text{N}_8\text{SO}_2\text{Ph-}o\text{-H}$ ), 7.96 (d,  $J = 7.7$  Hz, 2H,  $\text{N}_8\text{SO}_2\text{Ar-}o\text{-H}$ ), 7.66–7.63 (m, 2H,  $\text{C}_7\text{H}$   $\text{C}_7'\text{H}$ ) 7.31 (d,  $J = 7.5$  Hz, 1H,  $\text{C}_4\text{H}$ ) 7.24 (d,  $J = 7.1$  Hz, 1H,  $\text{C}_4'\text{H}$ ), 7.20 (d,  $J = 7.6$  Hz, 2H,  $\text{N}_8\text{SO}_2\text{Ar-}m\text{-H}$ ), 7.09–7.05 (m, 2H,  $\text{C}_6\text{H}$ ,  $\text{C}_6'\text{H}$ ), 7.04–7.00 (m, 3H,  $\text{N}_8\text{SO}_2\text{Ph-}p\text{-H}$ ,  $\text{N}_8\text{SO}_2\text{Ph-}m\text{-H}$ ), 6.95–6.90 (m, 2H,  $\text{C}_5\text{H}$ ,  $\text{C}_5'\text{H}$ ), 6.84 (s, 1H,  $\text{C}_{8a}\text{H}$ ), 6.74 (br-s, 1H,  $\text{C}_{8a}'\text{H}$ ), 4.96 (br-s, 2H,  $\text{SO}_2\text{NH}_2$ ), 4.74 (br-s, 1H,  $\text{N}_1\text{CO}_2\text{CH}_a\text{H}_b\text{CCl}_3$ ), 4.53 (d,  $J = 11.6$  Hz, 1H,  $\text{N}_1\text{CO}_2\text{CH}_a\text{H}_b\text{CCl}_3$ ), 3.83 (app-t,  $J = 10.6$  Hz, 1H,  $\text{C}_2\text{H}_a$ ), 3.74 (app-t,  $J = 8.8$  Hz, 1H,  $\text{C}_2\text{H}_a$ ), 3.41 (s, 3H,  $\text{N}_1\text{CO}_2\text{CH}_3$ ), 2.66–2.56 (m, 2H,  $\text{C}_2\text{H}_b$ ,  $\text{C}_2'\text{H}_b$ ), 2.54–2.45 (m, 2H,  $\text{C}_3\text{H}_a$ ,  $\text{C}_3'\text{H}_a$ ), 2.06 (m, 2H,  $\text{C}_3\text{H}_b$ ,  $\text{C}_3'\text{H}_b$ ), 1.07 (s, 9H,  $\text{C}(\text{CH}_3)_3$ ).

$^{13}\text{C}$  NMR (125.8 MHz,  $\text{C}_6\text{D}_6$ , 70  $^\circ\text{C}$ ):

$\delta$  157.5 ( $\text{N}_8\text{SO}_2\text{Ar-}p\text{-C}$ ), 155.4 ( $\text{N}_1\text{CO}_2\text{CH}_3$ ), 153.3 ( $\text{N}_1\text{CO}_2\text{CH}_2\text{CCl}_3$ ), 143.5 ( $\text{C}_{7a}'$ ), 143.3 ( $\text{C}_{7a}$ ), 140.8 ( $\text{N}_8\text{SO}_2\text{Ph-}ipso\text{-C}$ ), 138.7 ( $\text{N}_8\text{SO}_2\text{Ar-}ipso\text{-C}$ ), 133.6 ( $\text{N}_8\text{SO}_2\text{Ph-}p\text{-C}$ ), 132.5 ( $\text{C}_{4a}'$ ) 132.1 ( $\text{C}_{4a}$ ), 131.0 (2C,  $\text{C}_6$ ,  $\text{C}_6'$ ), 129.5 ( $\text{N}_8\text{SO}_2\text{Ph-}m\text{-C}$ ), 128.3 ( $\text{N}_8\text{SO}_2\text{Ar-}o\text{-C}$ ) 128.0 ( $\text{N}_8\text{SO}_2\text{Ph-}o\text{-C}$ ), 126.7 ( $\text{N}_8\text{SO}_2\text{Ar-}m\text{-C}$ ), 125.7 ( $\text{C}_4$ ), 125.6 ( $\text{C}_4'$ ), 125.5 (2C,  $\text{C}_5$ ,  $\text{C}_5'$ ), 117.8 ( $\text{C}_{7'}$ ), 117.3 ( $\text{C}_7$ ), 95.6 ( $\text{N}_1\text{CO}_2\text{CH}_2\text{CCl}_3$ ), 83.6 ( $\text{C}_{8a}$ ), 83.5 ( $\text{C}_{8a}'$ ), 75.9 ( $\text{N}_1\text{CO}_2\text{CH}_2\text{CCl}_3$ ), 73.2 (2C,

Application of diazene-directed fragment assembly to the enantioselective total synthesis and stereochemical assignment of (+)-desmethyl-*meso*-chimonanthine and related heterodimeric alkaloids.  
Stephen P. Lathrop and Mohammad Movassaghi\*

Page S35 / S153

$C_{3a}$ ,  $C_{3a'}$ ), 52.9 ( $N_1CO_2CH_3$ ), 45.8 ( $C_2$ ), 45.7 ( $C_{2'}$ ), 37.4 ( $C_3$ ), 36.6 ( $C_{3'}$ ), 35.4 ( $C(CH_3)_3$ ), 31.3 ( $C(CH_3)_3$ ).

FTIR (thin film)  $cm^{-1}$ : 2959 (w), 1717 (m), 1600 (w), 1448 (m), 1400 (w).

HRMS (ESI) ( $m/z$ ): calc'd for  $C_{41}H_{47}Cl_3N_7O_{10}S_3$   $[M+NH_4]^+$ : 998.1607, found: 998.1611.

$[\alpha]_D^{24}$ : +19 ( $c = 0.32$ ,  $CH_2Cl_2$ ).

TLC (33% acetone in hexanes),  $R_f$ : 0.18 (UV, CAM).

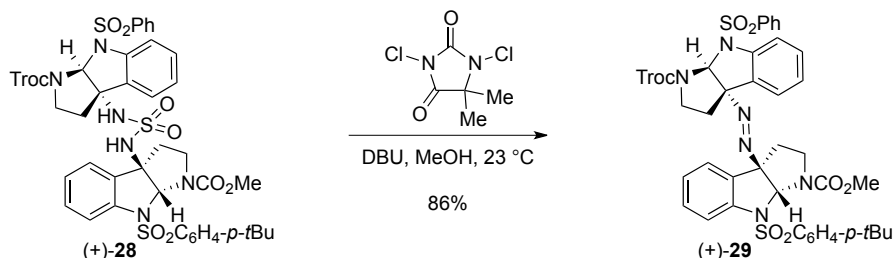

### Unsymmetrical Diazene (+)-29:

1,8-Diazabicyclo[5.4.0]undec-7-ene (DBU, 152  $\mu\text{L}$ , 1.02 mmol, 5.00 equiv) was added via syringe to a solution of mixed sulfamide (+)-28 (200 mg, 203  $\mu\text{mol}$ , 1 equiv) in methanol (15.0 mL) at 23  $^\circ\text{C}$ . After 5 min, a solution of 1,3-dichloro-5,5-dimethylhydantoin (100 mg, 507  $\mu\text{mol}$ , 2.50 equiv) in methanol (5 mL) was added via syringe over 1 min. After 30 min, the clear solution was concentrated under reduced pressure. The resulting residue was purified by flash column chromatography on silica gel (eluent: 17 $\rightarrow$ 25% acetone in hexanes) to afford the unsymmetrical diazene (+)-29 (159 mg, 85.5%) as a white foam.

As a result of the slow conformational equilibration at ambient temperature, NMR spectra were collected at elevated temperature. Structural assignments were made using additional information from gCOSY, HSQC, and HMBC experiments also collected at elevated temperature.

$^1\text{H}$  NMR (500 MHz,  $\text{CD}_3\text{CN}$ , 70  $^\circ\text{C}$ ):

$\delta$  7.82–7.79 (m, 4H,  $\text{N}_8\text{SO}_2\text{Ph-}o\text{-H}$ ,  $\text{N}_8\text{SO}_2\text{Ar-}o\text{-H}$ ), 7.62 (d,  $J = 8.3$  Hz, 1H,  $\text{C}_7\text{H}$ ), 7.55–7.49 (m, 4H,  $\text{N}_8\text{SO}_2\text{Ph-}p\text{-H}$ ,  $\text{N}_8\text{SO}_2\text{Ar-}m\text{-H}$ ,  $\text{C}_7\text{H}$ ), 7.41–7.36 (m, 4H,  $\text{N}_8\text{SO}_2\text{Ph-}m\text{-H}$ ,  $\text{C}_6\text{H}$ ,  $\text{C}_6'\text{H}$ ), 7.20–7.16 (m, 2H,  $\text{C}_5\text{H}$ ,  $\text{C}_4'\text{H}$ ), 7.11–7.05 (m, 2H,  $\text{C}_5'\text{H}$ ,  $\text{C}_4\text{H}$ ), 6.71 (s, 1H,  $\text{C}_{8a}\text{H}$ ), 6.55 (s, 1H,  $\text{C}_{8a}\text{H}$ ), 4.92 (d,  $J = 10.8$ , 1H,  $\text{N}_1\text{CO}_2\text{CH}_a\text{H}_b\text{CCl}_3$ ), 4.80 (d,  $J = 12.1$  Hz, 1H,  $\text{N}_1\text{CO}_2\text{CH}_a\text{H}_b\text{CCl}_3$ ), 4.01 (dd,  $J = 7.9$ , 11.7 Hz, 1H,  $\text{C}_2'\text{H}_a$ ), 3.83 (dd,  $J = 8.0$ , 11.4 Hz, 1H,  $\text{C}_2\text{H}_a$ ), 3.65 (s, 3H,  $\text{N}_1\text{CO}_2\text{CH}_3$ ), 3.05 (app-dt,  $J = 5.5$ , 11.8 Hz, 1H,  $\text{C}_2'\text{H}_b$ ), 2.94 (app-dt,  $J = 5.7$ , 12.7 Hz, 1H,  $\text{C}_2\text{H}_b$ ), 2.21 (dd,  $J = 5.3$ , 12.7 Hz, 1H,  $\text{C}_3'\text{H}_a$ ), 2.12 (dd,  $J = 5.6$ , 12.7 Hz, 1H,  $\text{C}_3\text{H}_a$ ), 2.01–1.89 (m, 2H,  $\text{C}_3\text{H}_b$ ,  $\text{C}_3'\text{H}_b$ ), 1.28 (s, 9H,  $\text{C}(\text{CH}_3)_3$ ).

$^{13}\text{C}$  NMR (125.8 MHz,  $\text{CD}_3\text{CN}$ , 70  $^\circ\text{C}$ ):

$\delta$  159.3 ( $\text{N}_8\text{SO}_2\text{Ar-}p\text{-C}$ ), 156.4 ( $\text{N}_1\text{CO}_2\text{CH}_3$ ), 154.3 ( $\text{N}_1\text{CO}_2\text{CH}_2\text{CCl}_3$ ), 144.3 ( $\text{C}_{7a}$ ), 144.1 ( $\text{C}_{7a}'$ ), 140.1 ( $\text{N}_8\text{SO}_2\text{Ph-}ipso\text{-C}$ ), 138.3 ( $\text{N}_8\text{SO}_2\text{Ar-}ipso\text{-C}$ ), 135.4 ( $\text{N}_8\text{SO}_2\text{Ph-}p\text{-C}$ ), 132.4 ( $\text{C}_{6'}$ ), 132.1 ( $\text{C}_6$ ), 131.2 ( $\text{C}_{4a}'$ ), 131.1 ( $\text{C}_{4a}$ ), 131.0 ( $\text{N}_8\text{SO}_2\text{Ph-}m\text{-C}$ ), 129.1 ( $\text{N}_8\text{SO}_2\text{Ar-}o\text{-C}$ ), 129.0 ( $\text{N}_8\text{SO}_2\text{Ph-}o\text{-C}$ ), 128.1 ( $\text{N}_8\text{SO}_2\text{Ar-}m\text{-C}$ ), 127.3 ( $\text{C}_{4'}$ ), 127.0 ( $\text{C}_4$ ), 126.9 ( $\text{C}_{5'}$ ), 126.5 ( $\text{C}_5$ ), 117.5 ( $\text{C}_{7'}$ ), 117.2 ( $\text{C}_{7'}$ ), 97.5 ( $\text{N}_1\text{CO}_2\text{CH}_2\text{CCl}_3$ ), 90.9 (2C,  $\text{C}_{3a}$ ,  $\text{C}_{3a}'$ ), 83.2 ( $\text{C}_{8a}$ ), 82.7 ( $\text{C}_{8a}'$ ), 76.8 ( $\text{N}_1\text{CO}_2\text{CH}_2\text{CCl}_3$ ), 54.0

Application of diazene-directed fragment assembly to the enantioselective total synthesis and stereochemical assignment of (+)-desmethyl-*meso*-chimonanthine and related heterodimeric alkaloids.  
Stephen P. Lathrop and Mohammad Movassaghi\*

Page S37 / S153

(N<sub>1</sub>CO<sub>2</sub>CH<sub>3</sub>), 47.4 (C<sub>2'</sub>), 47.1 (C<sub>2</sub>), 38.7 (C<sub>3'</sub>), 37.8 (C<sub>3</sub>), 36.7 (C(CH<sub>3</sub>)<sub>3</sub>), 32.1 (C(CH<sub>3</sub>)<sub>3</sub>).

FTIR (thin film) cm<sup>-1</sup>: 2958 (w), 1718 (s), 1597 (w), 1447 (m), 1366 (w).

HRMS (ESI) (*m/z*): calc'd for C<sub>41</sub>H<sub>45</sub>Cl<sub>3</sub>N<sub>7</sub>O<sub>8</sub>S<sub>2</sub> [M+NH<sub>4</sub>]<sup>+</sup>: 932.1831, found: 932.1853.

[α]<sub>D</sub><sup>24</sup>: +13 (*c* = 0.38, CH<sub>2</sub>Cl<sub>2</sub>).

TLC (33% acetone in hexanes), R<sub>f</sub>: 0.29 (UV, CAM).

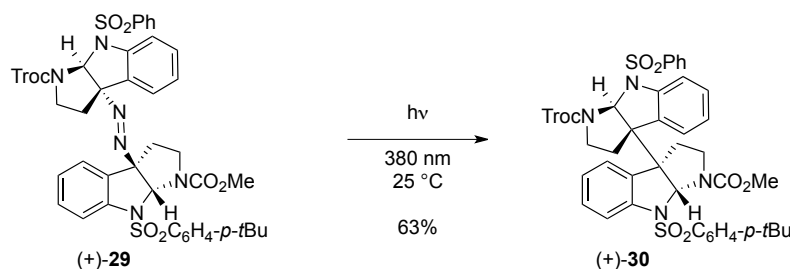

### Heterodimer (+)-30:

A solution of unsymmetrical diazene (+)-**29** (159 mg, 174  $\mu$ mol, 1 equiv) in dichloromethane (30 mL) was concentrated under reduced pressure in a 250 mL round bottom flask to provide a thin film of diazene (+)-**29** coating the flask. The flask was back filled with argon and irradiated in a Rayonet photoreactor equipped with 16 radially distributed ( $r=12.7$  cm) 25 W lamps ( $\lambda_{\text{max}}=380$  nm) at 25  $^{\circ}\text{C}$ . After 7 h, the thin film was purified by flash column chromatography on silica gel (eluent: 17 $\rightarrow$ 50% ethyl acetate in hexanes) to afford the heterodimer (+)-**30** (98 mg, 63.4%) as a white foam.

As a result of the slow conformational equilibration at ambient temperature, NMR spectra were collected at elevated temperature. Structural assignments were made using additional information from gCOSY, HSQC, and HMBC experiments also collected at elevated temperature.

$^1\text{H}$  NMR (500 MHz,  $\text{DMSO}-d_6$ , 100  $^{\circ}\text{C}$ ):  $\delta$  7.92 (d,  $J = 7.6$  Hz, 2H,  $\text{N}_8\text{SO}_2\text{Ph-}o\text{-H}$ ), 7.73 (d,  $J = 8.4$  Hz, 2H,  $\text{N}_8\text{SO}_2\text{Ar-}o\text{-H}$ ), 7.67 (t,  $J = 7.3$  Hz, 1H,  $\text{N}_8\text{SO}_2\text{Ph-}p\text{-H}$ ), 7.60–7.57 (m, 4H,  $\text{N}_8\text{SO}_2\text{Ar-}m\text{-H}$ ,  $\text{N}_8\text{SO}_2\text{Ph-}m\text{-H}$ ), 7.40–7.37 (m, 2H,  $\text{C}_7\text{H}$ ,  $\text{C}_7'\text{H}$ ), 7.34–7.28 (m, 2H,  $\text{C}_6\text{H}$ ,  $\text{C}_6'\text{H}$ ), 7.20 (br-s, 1H,  $\text{C}_4'\text{H}$ ), 7.07 (app-t,  $J = 7.5$  Hz, 1H,  $\text{C}_5\text{H}$ ), 6.98 (app-t,  $J = 7.4$  Hz, 1H,  $\text{C}_5'\text{H}$ ), 6.80 (br-s, 1H,  $\text{C}_4\text{H}$ ), 6.47 (s, 1H,  $\text{C}_{8a}\text{H}$ ), 6.28 (s, 1H,  $\text{C}_{8a}'\text{H}$ ), 4.82 (d,  $J = 11.9$ , 1H,  $\text{N}_1\text{CO}_2\text{CH}_a\text{H}_b\text{CCl}_3$ ), 4.71 (d,  $J = 11.9$  Hz, 1H,  $\text{N}_1\text{CO}_2\text{CH}_a\text{H}_b\text{CCl}_3$ ), 3.82 (dd,  $J = 7.3$ , 11.7 Hz, 1H,  $\text{C}_2\text{H}_a$ ), 3.72 (dd,  $J = 7.6$ , 11.5 Hz, 1H,  $\text{C}_2\text{H}_a$ ), 3.50 (s, 3H,  $\text{N}_1\text{CO}_2\text{CH}_3$ ), 2.67–2.60 (m, 2H,  $\text{C}_2\text{H}_b$ ,  $\text{C}_2'\text{H}_b$ ), 2.05–1.99 (m, 2H,  $\text{C}_3\text{H}$ ,  $\text{C}_3'\text{H}_a$ ), 1.89 (dd,  $J = 12.5$ , 19.9 Hz, 1H,  $\text{C}_3\text{H}_b$ ), 1.77 (app-dt,  $J = 7.9$ , 11.7 Hz, 1H,  $\text{C}_3\text{H}_b$ ), 1.31 (s, 9H,  $\text{C}(\text{CH}_3)_3$ ).

$^{13}\text{C}$  NMR (125.8 MHz,  $\text{DMSO}-d_6$ , 100  $^{\circ}\text{C}$ ):  $\delta$  156.0 ( $\text{N}_8\text{SO}_2\text{Ar-}p\text{-C}$ ), 153.0 ( $\text{N}_1\text{CO}_2\text{CH}_3$ ), 151.2 ( $\text{N}_1\text{CO}_2\text{CH}_2\text{CCl}_3$ ), 142.3 ( $\text{C}_{7a}$ ), 141.9 ( $\text{C}_{7a}'$ ), 139.8 ( $\text{N}_8\text{SO}_2\text{Ph-}ipso\text{-C}$ ), 137.1 ( $\text{N}_8\text{SO}_2\text{Ar-}ipso\text{-C}$ ), 132.8 ( $\text{N}_8\text{SO}_2\text{Ph-}p\text{-C}$ ), 130.0 ( $\text{C}_{4a}$ ), 129.6 ( $\text{C}_{4a}'$ ), 129.1 ( $\text{C}_{6/6'}$ ), 128.8 ( $\text{N}_8\text{SO}_2\text{Ph-}m\text{-C}$ ), 125.7 ( $\text{N}_8\text{SO}_2\text{Ph-}o\text{-C}$ ), 125.5 ( $\text{N}_8\text{SO}_2\text{Ar-}o/m\text{-C}$ ), 123.7 (2C,  $\text{C}_4$ ,  $\text{C}_4'$ ), 123.4 (2C,  $\text{C}_5$ ,  $\text{C}_5'$ ), 113.7 ( $\text{C}_7$ ), 113.4 ( $\text{C}_7'$ ), 95.1 ( $\text{N}_1\text{CO}_2\text{CH}_2\text{CCl}_3$ ), 79.8 (2C,  $\text{C}_{8a}$ ,  $\text{C}_{8a}'$ ), 73.9

Application of diazene-directed fragment assembly to the enantioselective total synthesis and stereochemical assignment of (+)-desmethyl-*meso*-chimonanthine and related heterodimeric alkaloids.

Stephen P. Lathrop and Mohammad Movassaghi\*

Page S39 / S153

(N<sub>1</sub>·CO<sub>2</sub>CH<sub>2</sub>CCl<sub>3</sub>), 61.3 (2C, C<sub>3a</sub>, C<sub>3a'</sub>), 51.8 (N<sub>1</sub>CO<sub>2</sub>CH<sub>3</sub>), 44.8 (C<sub>2'</sub>), 44.4 (C<sub>2</sub>), 35.0 (C<sub>3'</sub>), 34.5 (C<sub>3</sub>), 34.3 (C(CH<sub>3</sub>)<sub>3</sub>), 31.2 (C(CH<sub>3</sub>)<sub>3</sub>).

FTIR (thin film) cm<sup>-1</sup>: 2957(w), 1716 (s), 1595 (w), 1447 (m), 1167 (w).

HRMS (ESI) (*m/z*): calc'd for C<sub>41</sub>H<sub>41</sub>Cl<sub>3</sub>N<sub>4</sub>NaO<sub>8</sub>S<sub>2</sub> [M+Na]<sup>+</sup>: 909.1324, found: 909.1313.

[α]<sub>D</sub><sup>24</sup>: +23 (*c* = 0.49, CH<sub>2</sub>Cl<sub>2</sub>).

TLC (33% ethyl acetate in hexanes), R<sub>f</sub>: 0.29 (UV, CAM).

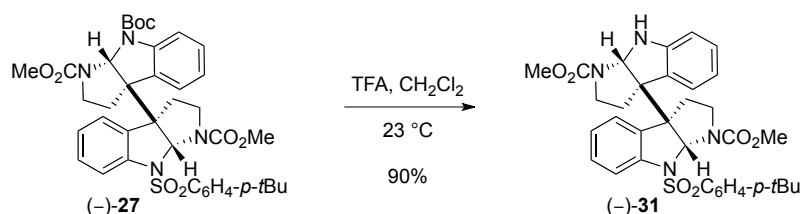

### N8'-H Heterodimer (–)-31:

Trifluoroacetic acid (400  $\mu$ L) was added via syringe to a solution of heterodimer (–)-27 (67.0 mg, 91.8  $\mu$ mol, 1 equiv) in dichloromethane (1.60 mL) at 23  $^{\circ}$ C. After 45 min, the orange solution was diluted with dichloromethane (25 mL) and washed with aqueous saturated sodium bicarbonate solution ( $2 \times 15$  mL). The combined aqueous washes were extracted with dichloromethane ( $2 \times 20$  mL). The combined organic extracts were washed with brine (15 mL), were dried over anhydrous sodium sulfate, were filtered, and were concentrated under reduced pressure. The resulting residue was purified by flash column chromatography on silica gel (eluent: 20 $\rightarrow$ 25% acetone in hexanes) to afford the N8'-H heterodimer (–)-31 (52.0 mg, 89.6%) as a white foam.

As a result of the slow conformational equilibration at ambient temperature, NMR spectra were collected at elevated temperature. Structural assignments were made using additional information from gCOSY, HSQC, and HMBC experiments also collected at elevated temperature.

$^1\text{H}$  NMR (500 MHz,  $\text{CD}_3\text{CN}$ , 70  $^{\circ}$ C):

$\delta$  7.84 (d,  $J = 8.3\text{Hz}$ , 2H,  $\text{N}_8\text{SO}_2\text{Ar-}o\text{-H}$ ), 7.64 (d,  $J = 8.3\text{Hz}$ , 2H,  $\text{N}_8\text{SO}_2\text{Ar-}m\text{-H}$ ), 7.53 (d,  $J = 8.3\text{Hz}$ , 1H,  $\text{C}_7\text{H}$ ), 7.46 (d,  $J = 7.7\text{ Hz}$ , 1H,  $\text{C}_4\text{H}$ ), 7.27 (app-t,  $J = 7.9\text{ Hz}$ , 1H,  $\text{C}_6\text{H}$ ), 7.06–7.02 (m, 3H,  $\text{C}_6\text{H}$ ,  $\text{C}_5\text{H}$ ,  $\text{C}_4\text{H}$ ), 6.61 (app-t,  $J = 7.5\text{ Hz}$ , 1H,  $\text{C}_5\text{H}$ ), 6.55 (d,  $J = 7.7\text{ Hz}$ , 1H,  $\text{C}_7\text{H}$ ), 5.96 (s, 1H,  $\text{C}_{8a}\text{H}$ ), 4.85 (br-s, 1H,  $\text{N}_8\text{H}$ ), 4.79 (s, 1H,  $\text{C}_{8a'}\text{H}$ ), 3.88 (dd,  $J = 7.9, 11.1\text{ Hz}$ , 1H,  $\text{C}_2\text{H}_a$ ), 3.61 (s, 3H,  $\text{N}_1\text{CO}_2\text{CH}_3$ ), 3.54 (app-t,  $J = 8.4\text{ Hz}$ , 1H,  $\text{C}_2'\text{H}_a$ ), 3.47 (s, 3H,  $\text{N}_1\text{CO}_2\text{CH}_3$ ), 2.80–2.67 (m, 2H,  $\text{C}_2\text{H}_b$ ,  $\text{C}_2'\text{H}_b$ ), 2.46 (app-dt,  $J = 7.9, 12.1\text{ Hz}$ , 1H,  $\text{C}_3\text{H}_a$ ), 2.35 (dd,  $J = 11.2, 20.3\text{ Hz}$ , 1H,  $\text{C}_3'\text{H}_a$ ), 2.12 (dd,  $J = 6.0, 12.5\text{ Hz}$ , 1H,  $\text{C}_3\text{H}_b$ ), 2.07 (dd,  $J = 5.4, 12.5\text{ Hz}$ , 1H,  $\text{C}_3'\text{H}_b$ ), 1.37 (s, 9H,  $\text{C}(\text{CH}_3)_3$ ).

$^{13}\text{C}$  NMR (125.8 MHz,  $\text{CD}_3\text{CN}$ , 70  $^{\circ}$ C):

$\delta$  159.2 ( $\text{N}_8\text{SO}_2\text{Ar-}p\text{-C}$ ), 156.1 (2C,  $\text{N}_1\text{CO}_2\text{CH}_3$ ,  $\text{N}_1\text{CO}_2\text{CH}_3$ ), 152.3 ( $\text{C}_{7a'}$ ), 144.7 ( $\text{C}_{7a}$ ), 139.3 ( $\text{N}_8\text{SO}_2\text{Ar-}ipso\text{-C}$ ), 133.7 ( $\text{C}_{4a}$ ), 131.0 ( $\text{C}_5$ ,  $\text{C}_6$ ), 130.3 ( $\text{C}_{4a'}$ ), 128.5 ( $\text{N}_8\text{SO}_2\text{Ar-}o\text{-C}$ ), 128.1 ( $\text{N}_8\text{SO}_2\text{Ar-}m\text{-C}$ ), 127.0 ( $\text{C}_4$ ), 126.1 ( $\text{C}_6'$ ), 125.3 ( $\text{C}_4'$ ), 120.3 ( $\text{C}_5'$ ), 115.5 ( $\text{C}_7$ ), 111.2 ( $\text{C}_7'$ ), 83.2 ( $\text{C}_{8a}$ ), 80.3 ( $\text{C}_{8a'}$ ), 64.3 (2C,  $\text{C}_{3a}$ ,  $\text{C}_{3a'}$ ), 53.8 ( $\text{N}_1\text{CO}_2\text{CH}_3$ ), 53.6 ( $\text{N}_1\text{CO}_2\text{CH}_3$ ), 46.5 (2C,  $\text{C}_2$ ,  $\text{C}_2'$ ), 37.6 ( $\text{C}_3$ ), 36.8 ( $\text{C}(\text{CH}_3)_3$ ), 34.5 ( $\text{C}_3'$ ), 32.2 ( $\text{C}(\text{CH}_3)_3$ ).



Application of diazene-directed fragment assembly to the enantioselective total synthesis and stereochemical assignment of (+)-desmethyl-*meso*-chimonanthine and related heterodimeric alkaloids.  
Stephen P. Lathrop and Mohammad Movassaghi\*

Page S41 / S153

|                                             |                                                                                                                          |
|---------------------------------------------|--------------------------------------------------------------------------------------------------------------------------|
| FTIR (thin film) $\text{cm}^{-1}$ :         | 3550 (br-m), 2956 (w), 1706 (s), 1595 (w), 1448 (s), 1384 (m), 1175 (m).                                                 |
| HRMS (ESI) ( $m/z$ ):                       | calc'd for $\text{C}_{34}\text{H}_{39}\text{N}_4\text{O}_6\text{S}$ $[\text{M}+\text{H}]^+$ : 631.2585, found: 631.2588. |
| $[\alpha]_{\text{D}}^{24}$ :                | $-283$ ( $c = 0.53$ , $\text{CH}_2\text{Cl}_2$ ).                                                                        |
| TLC (33% ethyl acetate in hexanes), $R_f$ : | 0.30 (UV, CAM).                                                                                                          |

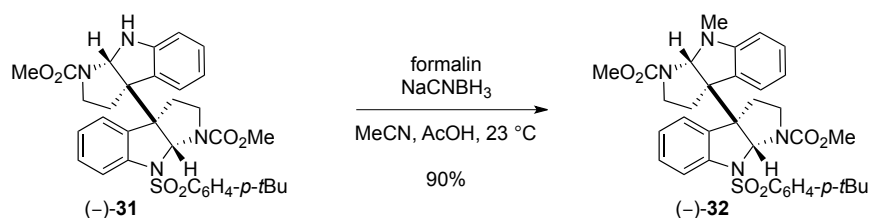

### N8'-Methyl Heterodimer (-)-32:

Formalin (37% wt, 1.26 mL, 16.76 mmol, 235 equiv) and sodium cyanoborohydride in tetrahydrofuran (1.0 M, 214  $\mu$ L, 214  $\mu$ mol, 3.00 equiv) were added sequentially via syringe to a solution of N8'-H heterodimer (-)-31 (45.0 mg, 71.3  $\mu$ mol, 1 equiv) in acetonitrile–acetic acid (10:1, 3.85 mL) at 23 °C. After 30 min, another portion of sodium cyanoborohydride (1.0 M in tetrahydrofuran, 71.0  $\mu$ L, 71.0  $\mu$ mol, 1.00 equiv) was added via syringe. After an additional 30 min, a saturated aqueous sodium bicarbonate solution (10 mL) was added and the resulting mixture was extracted with dichloromethane (3  $\times$  20 mL). The combined organic extracts were washed with brine (15 mL), were dried over anhydrous sodium sulfate, were filtered, and were concentrated under reduced pressure. The resulting residue was purified by flash column chromatography on silica gel (eluent: 15 $\rightarrow$ 20% acetone in hexanes) to afford the N8'-methyl heterodimer (-)-32 (41.0 mg, 89.6%) as a white foam.

As a result of the slow conformational equilibration at ambient temperature, NMR spectra were collected at elevated temperature. Structural assignments were made using additional information from gCOSY, HSQC, and HMBC experiments also collected at elevated temperature.

<sup>1</sup>H NMR (500 MHz, CD<sub>3</sub>CN, 70 °C):

$\delta$  7.83 (d,  $J$  = 8.3 Hz, 2H, N<sub>8</sub>SO<sub>2</sub>Ar-*o*-H), 7.61 (d,  $J$  = 8.3 Hz, 2H, N<sub>8</sub>SO<sub>2</sub>Ar-*m*-H), 7.43 (d,  $J$  = 8.3 Hz, 1H, C<sub>7</sub>H), 7.36 (d,  $J$  = 7.7 Hz, 1H, C<sub>4</sub>H), 7.25 (app-t,  $J$  = 7.9 Hz, 1H, C<sub>6</sub>H), 7.08 (app-t,  $J$  = 7.7 Hz, 1H, C<sub>6</sub>H), 7.04–6.97 (m, 2H, C<sub>5</sub>H, C<sub>4</sub>H), 6.50 (app-t,  $J$  = 7.5 Hz, 1H, C<sub>5</sub>H), 6.35 (d,  $J$  = 8.0 Hz, 1H, C<sub>7</sub>H), 6.05 (s, 1H, C<sub>8a</sub>H), 5.16 (s, 1H, C<sub>8a</sub>H), 3.87 (dd,  $J$  = 8.0, 11.2 Hz, 1H, C<sub>2</sub>H<sub>a</sub>), 3.77 (dd,  $J$  = 8.5, 10.4 Hz, 1H, C<sub>2</sub>H<sub>a</sub>), 3.60 (s, 3H, N<sub>1</sub>CO<sub>2</sub>CH<sub>3</sub>), 3.45 (s, 3H, N<sub>1</sub>CO<sub>2</sub>CH<sub>3</sub>), 2.83 (s, 3H, N<sub>1</sub>CH<sub>3</sub>), 2.77–2.65 (m, 2H, C<sub>2</sub>H<sub>b</sub>, C<sub>2</sub>H<sub>b</sub>), 2.43 (app dt,  $J$  = 8.0, 12.0 Hz, 1H, C<sub>3</sub>H<sub>a</sub>), 2.24 (app-dt,  $J$  = 8.0, 11.7 Hz, 1H, C<sub>3</sub>H<sub>a</sub>), 2.11 (dd,  $J$  = 5.4, 12.5 Hz, 1H, C<sub>3</sub>H<sub>b</sub>), 2.05 (dd,  $J$  = 5.6, 12.3 Hz, 1H, C<sub>3</sub>H<sub>b</sub>), 1.35 (s, 9H, C(CH<sub>3</sub>)<sub>3</sub>).

<sup>13</sup>C NMR (125.8 MHz, CD<sub>3</sub>CN, 70 °C):

$\delta$  159.0 (N<sub>8</sub>SO<sub>2</sub>Ar-*p*-C), 156.9 (N<sub>1</sub>CO<sub>2</sub>CH<sub>3</sub>), 156.1 (N<sub>1</sub>CO<sub>2</sub>CH<sub>3</sub>), 153.7 (C<sub>7a</sub>'), 144.7 (C<sub>7a</sub>'), 139.9 (N<sub>8</sub>SO<sub>2</sub>Ar-*ipso*-C), 133.8 (C<sub>4a</sub>), 131.1 (C<sub>6</sub>'), 130.8 (2C, C<sub>6</sub>, C<sub>4a</sub>'), 128.2 (N<sub>8</sub>SO<sub>2</sub>Ar-*o*-C), 128.1 (N<sub>8</sub>SO<sub>2</sub>Ar-*m*-C), 126.6 (C<sub>4</sub>), 125.6 (C<sub>4</sub>'), 125.2 (C<sub>5</sub>'), 118.9 (C<sub>5</sub>'), 115.7 (C<sub>7</sub>), 107.5 (C<sub>7</sub>'), 85.6

Application of diazene-directed fragment assembly to the enantioselective total synthesis and stereochemical assignment of (+)-desmethyl-*meso*-chimonanthine and related heterodimeric alkaloids.

Stephen P. Lathrop and Mohammad Movassaghi\*

Page S43 / S153

(C<sub>8a'</sub>), 83.3 (C<sub>8a</sub>), 64.4 (C<sub>3a</sub>), 63.6 (C<sub>3a'</sub>), 53.8 (N<sub>1</sub>CO<sub>2</sub>CH<sub>3</sub>), 53.6 (N<sub>1'</sub>CO<sub>2</sub>CH<sub>3</sub>), 46.6 (2C, C<sub>2</sub>, C<sub>2'</sub>), 37.2 (C<sub>3</sub>), 36.7 (C(CH<sub>3</sub>)<sub>3</sub>), 36.0 (C<sub>3'</sub>), 33.0 (N<sub>1'</sub>CH<sub>3</sub>), 32.1 (C(CH<sub>3</sub>)<sub>3</sub>).

FTIR (thin film) cm<sup>-1</sup>:

2956 (w), 1708 (s), 1605 (w), 1446 (m), 1385 (m).

HRMS (ESI) (*m/z*):

calc'd for C<sub>35</sub>H<sub>41</sub>N<sub>4</sub>O<sub>6</sub>S [M+H]<sup>+</sup>: 645.2741,  
found: 645.2728.

[α]<sub>D</sub><sup>24</sup>:

−321 (*c* = 0.17, CH<sub>2</sub>Cl<sub>2</sub>).

TLC (25% acetone in hexanes), R<sub>f</sub>:

0.18 (UV, CAM).

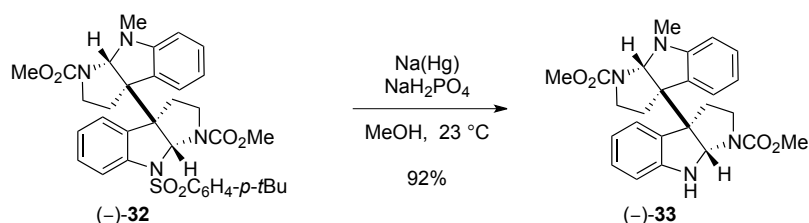

**(-)-N1,N1'-Carboxymethyl Calycanthidine (33):**

Sodium amalgam (5%-Na, 469 mg, 1.02 mmol, 20.0 equiv)<sup>8</sup> was added to a suspension of sodium phosphate monobasic monohydrate (154 mg, 1.12 mmol, 22.0 equiv) and N8'-methyl heterodimer (-)-**32** (33.0 mg, 51.2  $\mu$ mol, 1 equiv) in methanol at 23 °C. After 1 h, another portion of sodium phosphate monobasic monohydrate (154 mg, 1.12 mmol, 22.0 equiv) and sodium amalgam (5%-Na, 469 mg, 1.02 mmol, 20.0 equiv) were added sequentially. After an additional 1 h, the reaction mixture was diluted with ethyl acetate (20 mL) and was washed with a 5% aqueous sodium bicarbonate solution (10 mL). The aqueous phase was separated and extracted with ethyl acetate (2  $\times$  20 mL). The combined organic layers were washed with brine (10 mL), were dried over anhydrous sodium sulfate, were filtered, and were concentrated under reduced pressure. The resulting residue was purified by flash column chromatography on silica gel (eluent: gradient, 15 $\rightarrow$ 20% acetone in hexanes) to afford (-)-N1,N1'-carboxymethyl calycanthidine (**33**, 21.0 mg, 91.8%) as a white foam.

As a result of the slow conformational equilibration at ambient temperature, NMR spectra were collected at elevated temperature. Structural assignments were made using additional information from gCOSY, HSQC, and HMBC experiments also collected at elevated temperature.

<sup>1</sup>H NMR (500 MHz, CD<sub>3</sub>CN, 70 °C):

$\delta$  7.27–7.23 (m, 2H, C<sub>4</sub>H, C<sub>4'</sub>H), 7.13 (app-t,  $J$  = 7.5 Hz, 1H, C<sub>6</sub>H), 7.08 (app-t,  $J$  = 7.7 Hz, 1H, C<sub>6</sub>H), 6.71 (app-t,  $J$  = 7.4 Hz, 1H, C<sub>5</sub>H), 6.65 (app-t,  $J$  = 7.5 Hz, 1H, C<sub>5</sub>H), 6.61 (d,  $J$  = 7.7 Hz, 1H, C<sub>7</sub>H), 6.40 (d,  $J$  = 8.0 Hz, 1H, C<sub>7</sub>H), 5.30 (br-s, 1H, N<sub>8</sub>H), 5.10 (s, 1H, C<sub>8a</sub>H), 4.85 (s, 1H, C<sub>8a</sub>H), 3.82–3.73 (m, 1H, C<sub>2</sub>H<sub>a</sub>), 3.63–3.57 (m, 1H, C<sub>2</sub>H<sub>a</sub>), 3.61 (s, 3H, N<sub>1</sub>CO<sub>2</sub>CH<sub>3</sub>), 3.57 (s, 3H, N<sub>1'</sub>CO<sub>2</sub>CH<sub>3</sub>), 2.90 (s, 3H, N<sub>8</sub>CH<sub>3</sub>), 2.81 (app-dt,  $J$  = 6.1, 10.7 Hz, 1H, C<sub>2</sub>H<sub>b</sub>), 2.71 (app-dt,  $J$  = 5.8, 11.2 Hz, 1H, C<sub>2</sub>H<sub>b</sub>), 2.62–2.46 (m, 2H, C<sub>3</sub>H<sub>a</sub>, C<sub>3</sub>H<sub>a</sub>), 2.21 (dd,  $J$  = 6.1, 12.5 Hz, 1H, C<sub>3</sub>H<sub>b</sub>), 2.12 (dd,  $J$  = 5.6, 12.3 Hz, 1H, C<sub>3</sub>H<sub>b</sub>).

<sup>13</sup>C NMR (125.8 MHz, CD<sub>3</sub>CN, 70 °C):

$\delta$  157.0 (N<sub>1</sub>'CO<sub>2</sub>CH<sub>3</sub>), 153.9 (C<sub>7a</sub>'), 152.7 (C<sub>7a</sub>), 131.3, (C<sub>4a</sub>'), 131.0 (C<sub>6</sub>'), 130.9 (C<sub>4a</sub>), 130.8 (C<sub>6</sub>), 126.5 (C<sub>4</sub>), 126.2 (C<sub>4</sub>'), 120.1 (C<sub>5</sub>), 118.8 (C<sub>5</sub>'), 111.0 (C<sub>7</sub>), 107.5 (C<sub>7</sub>'), 85.8 (C<sub>8a</sub>'), 80.4 (C<sub>8a</sub>), 63.0

<sup>8</sup> The reagent was prepared according to R. N. McDonald and C. E. Reineke *Org. Synth.*1988, **6**, 461.

Application of diazene-directed fragment assembly to the enantioselective total synthesis and stereochemical assignment of (+)-desmethyl-*meso*-chimonanthine and related heterodimeric alkaloids.  
Stephen P. Lathrop and Mohammad Movassaghi\*

Page S45 / S153

|                                                |                                                                                                                                                                                                                                                                                         |
|------------------------------------------------|-----------------------------------------------------------------------------------------------------------------------------------------------------------------------------------------------------------------------------------------------------------------------------------------|
|                                                | (C <sub>3a'</sub> ), 53.5 (2C, N <sub>1</sub> CO <sub>2</sub> CH <sub>3</sub> , N <sub>1'</sub> CO <sub>2</sub> CH <sub>3</sub> ), 46.8 (2C, C <sub>2</sub> , C <sub>2'</sub> ), 35.4 (C <sub>3'</sub> ), 34.0 (C <sub>3</sub> ), 33.5 (N <sub>8'</sub> CH <sub>3</sub> ). <sup>9</sup> |
| FTIR (thin film) cm <sup>-1</sup> :            | 3363 (br-w), 2953 (w), 2881 (w), 1698 (s), 1605 (m), 1449 (s), 1383 (s), 1202 (w).                                                                                                                                                                                                      |
| HRMS (ESI) ( <i>m/z</i> ):                     | calc'd for C <sub>25</sub> H <sub>29</sub> N <sub>4</sub> O <sub>4</sub> [M+H] <sup>+</sup> : 499.2183, found: 449.2172.                                                                                                                                                                |
| [α] <sub>D</sub> <sup>24</sup> :               | -509 ( <i>c</i> = 0.78, CH <sub>2</sub> Cl <sub>2</sub> ).                                                                                                                                                                                                                              |
| TLC (25% acetone in hexanes), R <sub>f</sub> : | 0.30 (UV, CAM).                                                                                                                                                                                                                                                                         |

---

<sup>9</sup> The C<sub>3a'</sub>, and N<sub>1</sub>CO<sub>2</sub>CH<sub>3</sub> were not observed, due to signal broadening, even at 70 °C. All expected <sup>13</sup>C signals were observed in the following compound.

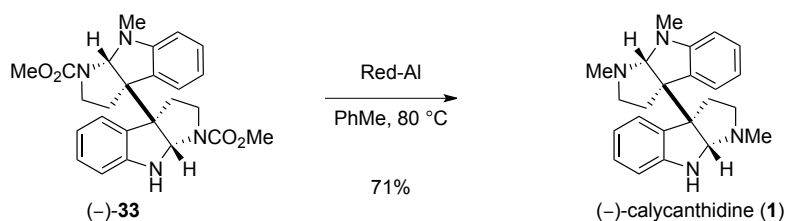

### **(-)-Calycanthidine (**1**):**

(-)-N1,N1'-Carboxymethyl calycanthidine (**33**, 15.4 mg, 34.3  $\mu\text{mol}$ , 1 equiv) was azeotropically dried from anhydrous benzene ( $2 \times 5 \text{ mL}$ ) and the residue was dissolved in toluene (3.5 mL). A solution of sodium bis(2-methoxyethoxy)aluminum hydride in toluene (Red-Al, 70% wt, 149  $\mu\text{L}$ , 515  $\mu\text{mol}$ , 15.0 equiv) was added via syringe at 23  $^\circ\text{C}$ . The reaction flask was fitted with a reflux condenser and heated to 80  $^\circ\text{C}$ . After 1 h, the reaction mixture was allowed to cool to 23  $^\circ\text{C}$  and excess reducing reagent was quenched by the addition of saturated aqueous sodium sulfate solution (100  $\mu\text{L}$ ). The resulting heterogeneous mixture was stirred for 10 min and then solid anhydrous sodium sulfate was added. The mixture was filtered through a plug of Celite and the filter cake was rinsed with dichloromethane (15 mL). The filtrate was concentrated under reduced pressure. The resulting residue was purified by flash column chromatography on silica gel (eluent: 10% methanol  $\rightarrow$  10% methanol saturated with ammonium hydroxide in chloroform) to afford (-)-calycanthidine (**1**, 8.7 mg, 70.9%) as a white solid.

As a result of the slow conformational equilibration at ambient temperature, NMR spectra were collected at elevated temperature. Structural assignments were made using additional information from gCOSY, HSQC, and HMBC experiments also collected at elevated temperature.

$^1\text{H}$  NMR (500 MHz,  $\text{CDCl}_3$ , 50  $^\circ\text{C}$ ):

$\delta$  7.06 (d,  $J = 7.4 \text{ Hz}$ , 1H,  $\text{C}_4\text{H}$ ), 7.00 (d,  $J = 5.8 \text{ Hz}$ , 1H,  $\text{C}_4\text{H}$ ), 6.98 (app-t,  $J = 7.7 \text{ Hz}$ , 1H,  $\text{C}_6\text{H}$ ), 6.92 (app-t,  $J = 7.5 \text{ Hz}$ , 1H,  $\text{C}_6\text{H}$ ), 6.58 (app-t,  $J = 7.5 \text{ Hz}$ , 1H,  $\text{C}_5\text{H}$ ), 6.51 (app-t,  $J = 7.2 \text{ Hz}$ , 1H,  $\text{C}_5\text{H}$ ), 6.48 (d,  $J = 8.0 \text{ Hz}$ , 1H,  $\text{C}_7\text{H}$ ), 6.27 (d,  $J = 7.7 \text{ Hz}$ , 1H,  $\text{C}_7\text{H}$ ), 4.47 (s, 1H,  $\text{C}_{8a}\text{H}$ ), 4.37 (s, 1H,  $\text{C}_{8a}\text{H}$ ), 2.98 (s, 3H,  $\text{N}_8\text{CH}_3$ ), 2.65–3.41 (m, 6H,  $\text{C}_2\text{H}_a$ ,  $\text{C}_2'\text{H}_a$ ,  $\text{C}_2\text{H}_b$ ,  $\text{C}_2'\text{H}_b$ ,  $\text{C}_3\text{H}_a$ ,  $\text{C}_3'\text{H}_a$ ), 2.38 (s, 3H,  $\text{N}_1\text{CH}_3$ ), 2.33 (s, 3H,  $\text{N}_1\text{CH}_3$ ), 2.01–1.93 (m, 2H,  $\text{C}_3\text{H}_b$ ,  $\text{C}_3'\text{H}_b$ ).

$^{13}\text{C}$  NMR (125.8 MHz,  $\text{CDCl}_3$ , 50  $^\circ\text{C}$ ):

$\delta$  153.2 ( $\text{C}_{7a}$ ), 151.2 ( $\text{C}_{7a}$ ), 133.6 ( $\text{C}_{4a}$ ), 133.1 ( $\text{C}_{4a}$ ), 128.4 ( $\text{C}_{6'}$ ), 128.2 ( $\text{C}_6$ ), 124.7 ( $\text{C}_4$ ), 124.0 ( $\text{C}_4'$ ), 118.6 ( $\text{C}_5$ ), 117.1 ( $\text{C}_5'$ ), 109.3 ( $\text{C}_7$ ), 106.2 ( $\text{C}_7'$ ), 92.4 ( $\text{C}_{8a'}$ ), 85.5 ( $\text{C}_{8a}$ ), 63.8 ( $\text{C}_{3a}$ ), 63.2 ( $\text{C}_{3a'}$ ), 52.9 ( $\text{C}_2$ ,  $\text{C}_2'$ ), 38.2 ( $\text{N}_1\text{CH}_3$ ), 37.3 ( $\text{N}_1\text{CH}_3$ ), 35.7 ( $\text{C}_3'$ ), 35.6 ( $\text{C}_3$ ), 35.6 ( $\text{N}_8\text{CH}_3$ ).

Application of diazene-directed fragment assembly to the enantioselective total synthesis and stereochemical assignment of (+)-desmethyl-*meso*-chimonanthine and related heterodimeric alkaloids.

Stephen P. Lathrop and Mohammad Movassaghi\*

Page S47 / S153

$^1\text{H}$  NMR (500 MHz, DMSO- $d_6$ , 100 °C):  $\delta$  7.04 (d,  $J$  = 7.6 Hz, 1H, C $_4$ 'H), 6.94 (d,  $J$  = 7.2 Hz, 1H, C $_4$ H), 6.89 (app-t,  $J$  = 7.4 Hz, 1H, C $_6$ H), 6.80 (app-t,  $J$  = 7.2 Hz, 1H, C $_6$ H), 6.45–6.40 (m, 2H, C $_5$ H, C $_5$ 'H), 6.38 (d,  $J$  = 7.6 Hz, 1H, C $_7$ H), 6.26 (d,  $J$  = 7.8 Hz, 1H, C $_7$ 'H), 5.90 (br-s, 1H, N $_8$ H), 4.54 (s, 1H, C $_{8a}$ H), 4.44 (s, 1H, C $_{8a}$ 'H), 2.93 (s, 3H, N $_8$ CH $_3$ ), 2.65–2.57 (m, 2H, C $_2$ H $_a$ , C $_2$ 'H $_a$ ), 2.43–2.33 (m, 4H, C $_2$ H $_b$ , C $_2$ 'H $_b$ , C $_3$ H $_a$ , C $_3$ 'H $_a$ ), 2.36 (s, 3H, N $_1$ CH $_3$ ), 2.30 (s, 3H, N $_1$ CH $_3$ ), 1.91–1.82 (m, 2H, C $_3$ H $_b$ , C $_3$ 'H $_b$ ).

$^{13}\text{C}$  NMR (125.8 MHz, DMSO- $d_6$ , 100 °C):  $\delta$  152.3 (C $_{7a}$ '), 151.2 (C $_{7a}$ ), 132.4, (2C, C $_{4a}$ , C $_{4a}$ '), 127.1 (C $_6$ '), 126.7 (C $_6$ ), 123.1 (C $_4$ ), 122.7 (C $_4$ '), 116.0 (C $_5$ ), 115.8 (C $_5$ '), 107.3 (C $_7$ ), 105.0 (C $_7$ '), 91.1 (C $_{8a}$ '), 84.1 (C $_{8a}$ ), 62.1 (C $_{3a}$ '), 62.0 (C $_{3a}$ ), 51.3 (C $_2$ '), 51.2 (C $_2$ ), 36.9 (N $_1$ CH $_3$ ), 35.7 (N $_1$ CH $_3$ ), 34.9 (C $_{3/3'}$ ), 34.6 (C $_{3/3'}$ ) 34.5 (N $_8$ CH $_3$ ).

FTIR (thin film) cm $^{-1}$ : 3385 (br-w), 2929 (w), 2789 (w), 1603 (m), 1488 (w), 1249 (w).

HRMS (ESI) ( $m/z$ ): calc'd for C $_{23}$ H $_{29}$ N $_4$  [M+H] $^+$ : 361.2387, found: 361.2397.

$[\alpha]_D^{24}$ : –278 ( $c$  = 0.28, MeOH).<sup>10</sup>

TLC (10% methanol in chloroform saturated ammonium hydroxide), R $_f$ : 0.55 (UV, CAM).

<sup>10</sup> Literature value:  $[\alpha]_D^{24} = -285.1$  ( $c$  1.992, MeOH), see G. Barger, A. Jacob, J. Madinaveitia *Trav. Chim.* 1938, **57**, 548.

Literature value:  $[\alpha]_D^{27} = -301$  ( $c$  0.97, MeOH), see E. A. Peterson, PhD Dissertation, University of California, Irvine, 2005.

**Table S1. Comparison of our  $^1\text{H}$  NMR data for (–)-calycanthidine (1) with literature data ( $\text{CDCl}_3$ ):**

| Assignment          | Overman's Report <sup>11</sup><br>(–)-calycanthidine<br>$^1\text{H}$ NMR, 500 MHz<br>$\text{CDCl}_3$ , 50 °C | Takayama's Report <sup>12</sup><br>(–)-calycanthidine<br>$^1\text{H}$ NMR, 500 MHz<br>$\text{CDCl}_3$ , 50 °C | This Work<br>(–)-calycanthidine<br>$^1\text{H}$ NMR, 500 MHz<br>$\text{CDCl}_3$ , 50 °C |
|---------------------|--------------------------------------------------------------------------------------------------------------|---------------------------------------------------------------------------------------------------------------|-----------------------------------------------------------------------------------------|
| N1'-CH <sub>3</sub> | 2.41 (s, 3H)                                                                                                 | 2.38 (s, 3H)                                                                                                  | 2.38 (s, 3H)                                                                            |
| N1-CH <sub>3</sub>  | 2.36 (s, 3H)                                                                                                 | 2.33 (s, 3H)                                                                                                  | 2.33 (s, 3H)                                                                            |
| C2'                 | 2.68–2.42 (m, 2H)                                                                                            | 2.65–2.40 (m, 2H)                                                                                             | 2.65–2.40 (m, 2H)                                                                       |
| C2                  | 2.68–2.42 (m, 2H)                                                                                            | 2.65–2.40 (m, 2H)                                                                                             | 2.65–2.40 (m, 2H)                                                                       |
| C3'                 | 2.68–2.42 (m, 2H)                                                                                            | 2.65–2.40 (m, 2H)                                                                                             | 2.65–2.40 (m, 2H)                                                                       |
| C3                  | 2.68–2.42 (m, 2H)                                                                                            | 2.65–2.40 (m, 2H)                                                                                             | 2.65–2.40 (m, 2H)                                                                       |
| C3a                 | –                                                                                                            | –                                                                                                             | –                                                                                       |
| C3a'                | –                                                                                                            | –                                                                                                             | –                                                                                       |
| C4'                 | 7.10 (d, $J = 7.3\text{ Hz}$ , 1H)                                                                           | 7.07 (d, $J = 7.3\text{ Hz}$ , 1H)                                                                            | 7.06 (d, $J = 7.4\text{ Hz}$ , 1H)                                                      |
| C4                  | 7.05 (d, $J = 7.2\text{ Hz}$ , 1H)                                                                           | 7.02 (d, $J = 7.3\text{ Hz}$ , 1H)                                                                            | 7.00 (d, $J = 5.8\text{ Hz}$ , 1H)                                                      |
| C4a'                | –                                                                                                            | –                                                                                                             | –                                                                                       |
| C4a                 | –                                                                                                            | –                                                                                                             | –                                                                                       |
| C5'                 | 6.55 (t, $J = 7.4\text{ Hz}$ , 1H)                                                                           | 6.52 (dd, $J = 7.3, 7.3\text{ Hz}$ , 1H)                                                                      | 6.51 (app-t, $J = 7.2\text{ Hz}$ , 1H)                                                  |
| C5                  | 6.58 (t, $J = 7.4\text{ Hz}$ , 1H)                                                                           | 6.59 (dd, $J = 7.3, 7.3\text{ Hz}$ , 1H)                                                                      | 6.58 (app-t, $J = 7.5\text{ Hz}$ , 1H)                                                  |
| C6'                 | 7.01 (dd, $J = 7.5, 7.7\text{ Hz}$ , 1H)                                                                     | 6.98 (dd, $J = 7.3, 7.6\text{ Hz}$ , 1H)                                                                      | 6.98 (app-t, $J = 7.7\text{ Hz}$ , 1H)                                                  |
| C6                  | 6.94 (dd, $J = 7.5, 7.5\text{ Hz}$ , 1H)                                                                     | 6.92 (dd, $J = 7.3, 7.6\text{ Hz}$ , 1H)                                                                      | 6.92 (app-t, $J = 7.5\text{ Hz}$ , 1H)                                                  |
| C7'                 | 6.30 (d, $J = 7.8\text{ Hz}$ , 1H)                                                                           | 6.27 (d, $J = 7.6\text{ Hz}$ , 1H)                                                                            | 6.27 (d, $J = 7.7\text{ Hz}$ , 1H)                                                      |
| C7                  | 6.50 (d, $J = 7.8\text{ Hz}$ , 1H)                                                                           | 6.48 (d, $J = 7.6\text{ Hz}$ , 1H)                                                                            | 6.48 (d, $J = 8.0\text{ Hz}$ , 1H)                                                      |
| C7a'                | –                                                                                                            | –                                                                                                             | –                                                                                       |
| C7a                 | –                                                                                                            | –                                                                                                             | –                                                                                       |
| N8'-CH <sub>3</sub> | 3.01 (s, 3H)                                                                                                 | 2.98 (s, 1H)                                                                                                  | 2.98 (s, 1H)                                                                            |
| N8-H                | –                                                                                                            | –                                                                                                             | –                                                                                       |
| C8a'                | 4.40 (s, 1H)                                                                                                 | 4.38 (s, 1H)                                                                                                  | 4.37 (s, 1H)                                                                            |
| C8a                 | 4.48 (s, 1H)                                                                                                 | 4.42 (s, 1H)                                                                                                  | 4.47 (s, 1H)                                                                            |

<sup>11</sup> E. A. Peterson, Ph.D. Dissertation, University of California, Irvine, 2005.

<sup>12</sup> H. Takayama, Y. Matsuda, K. Maubuchi, A. Ishida, M. Kitajima, and N. Aimi, *Tetrahedron*, 2004, **60**, 893.



**Table S2. Comparison of <sup>13</sup>C NMR data of (–)-calycanthidine (1) with literature data (CDCl<sub>3</sub>):**

| Assignment          | Overman’s Report <sup>11</sup><br>(–)-calycanthidine<br><sup>13</sup> C NMR, 125.8 MHz<br>CDCl <sub>3</sub> , 50 °C | Takayama’s Report <sup>12</sup><br>(–)-calycanthidine<br><sup>13</sup> C NMR, 125.8 MHz<br>CDCl <sub>3</sub> 50 °C | This Work<br>(–)-calycanthidine<br><sup>13</sup> C NMR, 125.8 MHz<br>CDCl <sub>3</sub> 50 °C | Chemical Shift<br>Difference<br>Δδ = δ (this<br>work) – δ (ref<br>11) | Chemical Shift<br>Difference<br>Δδ = δ (this<br>work) – δ (ref<br>12) |
|---------------------|---------------------------------------------------------------------------------------------------------------------|--------------------------------------------------------------------------------------------------------------------|----------------------------------------------------------------------------------------------|-----------------------------------------------------------------------|-----------------------------------------------------------------------|
| N1’-CH <sub>3</sub> | 37.9                                                                                                                | 37.9                                                                                                               | 38.2                                                                                         | 0.3                                                                   | 0.3                                                                   |
| N1-CH <sub>3</sub>  | 37.0                                                                                                                | 37.0                                                                                                               | 37.3                                                                                         | 0.3                                                                   | 0.3                                                                   |
| C2’                 | 52.6                                                                                                                | 52.6                                                                                                               | 52.9                                                                                         | 0.3                                                                   | 0.3                                                                   |
| C2                  | 52.6                                                                                                                | 52.6                                                                                                               | 52.9                                                                                         | 0.3                                                                   | 0.3                                                                   |
| C3’                 | 35.7                                                                                                                | 35.7                                                                                                               | 35.7                                                                                         | 0.0                                                                   | 0.0                                                                   |
| C3                  | 35.6                                                                                                                | 35.7                                                                                                               | 35.6                                                                                         | 0.0                                                                   | -0.1                                                                  |
| C3a’                | 62.9                                                                                                                | 62.8                                                                                                               | 63.2                                                                                         | 0.3                                                                   | 0.4                                                                   |
| C3a                 | 63.5                                                                                                                | 63.2                                                                                                               | 63.8                                                                                         | 0.3                                                                   | 0.6                                                                   |
| C4’                 | 123.6                                                                                                               | 123.6                                                                                                              | 124.0                                                                                        | 0.4                                                                   | 0.4                                                                   |
| C4                  | 124.4                                                                                                               | 124.4                                                                                                              | 124.7                                                                                        | 0.3                                                                   | 0.3                                                                   |
| C4a’                | 132.9                                                                                                               | 132.7                                                                                                              | 133.1                                                                                        | 0.2                                                                   | 0.4                                                                   |
| C4a                 | 133.4                                                                                                               | 133.3                                                                                                              | 133.6                                                                                        | 0.2                                                                   | 0.3                                                                   |
| C5’                 | 116.7                                                                                                               | 116.7                                                                                                              | 117.1                                                                                        | 0.4                                                                   | 0.4                                                                   |
| C5                  | 118.2                                                                                                               | 118.2                                                                                                              | 118.6                                                                                        | 0.4                                                                   | 0.4                                                                   |
| C6’                 | 128.1                                                                                                               | 128.1                                                                                                              | 128.4                                                                                        | 0.3                                                                   | 0.3                                                                   |
| C6                  | 127.8                                                                                                               | 127.9                                                                                                              | 128.2                                                                                        | 0.4                                                                   | 0.3                                                                   |
| C7’                 | 105.8                                                                                                               | 105.9                                                                                                              | 106.2                                                                                        | 0.4                                                                   | 0.3                                                                   |
| C7                  | 108.9                                                                                                               | 109.0                                                                                                              | 109.3                                                                                        | 0.4                                                                   | 0.3                                                                   |
| C7a’                | 152.9                                                                                                               | 152.8                                                                                                              | 153.2                                                                                        | 0.3                                                                   | 0.4                                                                   |
| C7a                 | 151.0                                                                                                               | 150.8                                                                                                              | 151.2                                                                                        | 0.2                                                                   | 0.4                                                                   |
| N8’-CH <sub>3</sub> | 35.4                                                                                                                | 35.4                                                                                                               | 35.6                                                                                         | 0.2                                                                   | 0.2                                                                   |
| N8-H                | –                                                                                                                   | –                                                                                                                  | –                                                                                            | –                                                                     | –                                                                     |
| C8a’                | 92.1                                                                                                                | 91.8                                                                                                               | 92.4                                                                                         | 0.3                                                                   | 0.6                                                                   |
| C8a                 | 85.1                                                                                                                | 85.0                                                                                                               | 85.5                                                                                         | 0.4                                                                   | 0.5                                                                   |

**Table S3. Comparison of our <sup>1</sup>H NMR data for (–)-calycanthidine (1) with literature data (DMSO-*d*<sub>6</sub>):**

| Assignment          | Overman's Report <sup>13</sup><br>(–)-calycanthidine<br><sup>1</sup> H NMR, 500 MHz<br>DMSO- <i>d</i> <sub>6</sub> , 100 °C | This Work<br>(–)-calycanthidine<br><sup>1</sup> H NMR, 500 MHz<br>DMSO- <i>d</i> <sub>6</sub> , 100 °C |
|---------------------|-----------------------------------------------------------------------------------------------------------------------------|--------------------------------------------------------------------------------------------------------|
| N1'-CH <sub>3</sub> | 2.40 (m, 3H)                                                                                                                | 2.36 (s, 3H)                                                                                           |
| N1-CH <sub>3</sub>  | 2.33 (s, 3H)                                                                                                                | 2.30 (s, 3H)                                                                                           |
| C2'                 | 2.68–2.59 (m, 2H)<br>2.51–2.42 (m, 2H)                                                                                      | 2.65–2.57 (m, 2H)<br>2.43–2.33 (m, 2H)                                                                 |
| C2                  | 2.68–2.59 (m, 2H)<br>2.51–2.42 (m, 2H)                                                                                      | 2.65–2.57 (m, 2H)<br>2.43–2.33 (m, 2H)                                                                 |
| C3'                 | 2.40–2.36 (m, 1H)<br>2.00–1.86 (m, 2H)                                                                                      | 2.43–2.33 (m, 2H)<br>1.91–1.82 (m, 2H)                                                                 |
| C3                  | 2.51–2.42 (m, 2H)<br>2.00–1.86 (m, 2H)                                                                                      | 2.43–2.33 (m, 2H)<br>1.91–1.82 (m, 2H)                                                                 |
| C3a                 | –                                                                                                                           | –                                                                                                      |
| C3a'                | –                                                                                                                           | –                                                                                                      |
| C4'                 | 7.08 (dd, <i>J</i> = 7.4, 0.8 Hz, 1H)                                                                                       | 7.04 (d, <i>J</i> = 7.6 Hz, 1H)                                                                        |
| C4                  | 6.99 (d, <i>J</i> = 7.4 Hz, 1H)                                                                                             | 6.94 (d, <i>J</i> = 7.2 Hz, 1H)                                                                        |
| C4a'                | –                                                                                                                           | –                                                                                                      |
| C4a                 | –                                                                                                                           | –                                                                                                      |
| C5'                 | 6.49–6.41 (m, 2H)                                                                                                           | 6.45–6.40 (m, 2H)                                                                                      |
| C5                  | 6.49–6.41 (m, 2H)                                                                                                           | 6.45–6.40 (m, 2H)                                                                                      |
| C6'                 | 6.92 (app-dt, <i>J</i> = 7.7, 1.2 Hz, 1H)                                                                                   | 6.89 (app-t, <i>J</i> = 7.4 Hz, 1H)                                                                    |
| C6                  | 6.84 (app-dt, <i>J</i> = 7.6, 1.2 Hz, 1H)                                                                                   | 6.80 (app-t, <i>J</i> = 7.2 Hz, 1H)                                                                    |
| C7'                 | 6.28 (d, <i>J</i> = 7.8 Hz, 1H)                                                                                             | 6.26 (d, <i>J</i> = 7.8 Hz, 1H)                                                                        |
| C7                  | 6.49 (d, <i>J</i> = 7.8 Hz, 1H)                                                                                             | 6.38 (d, <i>J</i> = 7.6 Hz, 1H) <sup>14</sup>                                                          |
| C7a'                | –                                                                                                                           | –                                                                                                      |
| C7a                 | –                                                                                                                           | –                                                                                                      |
| N8'-CH <sub>3</sub> | 2.96 (s, 3H)                                                                                                                | 2.93 (s, 3H)                                                                                           |
| N8-H                | 5.83 (s br, 1H)                                                                                                             | 5.90 (s br, 1H)                                                                                        |
| C8a'                | 4.45 (s, 1H)                                                                                                                | 4.44 (s, 1H)                                                                                           |
| C8a                 | 4.55 (s, 1H)                                                                                                                | 4.54 (s, 1H)                                                                                           |

<sup>13</sup> L. E. Overman and E. A. Peterson, *Tetrahedron* 2003, **59**, 6905.

<sup>14</sup> Our assignment of these resonances is supported by key gCOSY, HSCQ, and HMBC correlations.

**Table S4. Comparison of <sup>13</sup>C NMR data of (–)-calycanthidine (1) with literature data (DMSO-*d*<sub>6</sub>):**

| Assignment          | Overman's Report <sup>13</sup><br>(–)-calycanthidine<br><sup>13</sup> C NMR, 125.8 MHz<br>DMSO- <i>d</i> <sub>6</sub> , 100 °C | This Work<br>(–)-calycanthidine<br><sup>13</sup> C NMR, 125.8 MHz<br>DMSO- <i>d</i> <sub>6</sub> , 100 °C | Chemical Shift<br>Difference<br>Δδ = δ (this work) – δ (ref<br>13) |
|---------------------|--------------------------------------------------------------------------------------------------------------------------------|-----------------------------------------------------------------------------------------------------------|--------------------------------------------------------------------|
| N1'-CH <sub>3</sub> | 36.9                                                                                                                           | 36.9                                                                                                      | 0.0                                                                |
| N1-CH <sub>3</sub>  | 35.6                                                                                                                           | 35.7                                                                                                      | 0.1                                                                |
| C2'                 | 51.3                                                                                                                           | 51.3                                                                                                      | 0.0                                                                |
| C2                  | 51.2                                                                                                                           | 51.2                                                                                                      | 0.0                                                                |
| C3'/3               | 34.9 or 34.6                                                                                                                   | 34.9 or 34.6                                                                                              | 0.0                                                                |
| C3a'                | 62.1                                                                                                                           | 62.1                                                                                                      | 0.0                                                                |
| C3a                 | 62.0                                                                                                                           | 62.0                                                                                                      | 0.0                                                                |
| C4'                 | 122.7                                                                                                                          | 122.7                                                                                                     | 0.0                                                                |
| C4                  | 123.1                                                                                                                          | 123.1                                                                                                     | 0.0                                                                |
| C4a'                | 132.4                                                                                                                          | 132.4                                                                                                     | 0.0                                                                |
| C4a                 | 132.4                                                                                                                          | 132.4                                                                                                     | 0.0                                                                |
| C5'                 | 115.7                                                                                                                          | 115.8                                                                                                     | 0.1                                                                |
| C5                  | 115.9                                                                                                                          | 116.0                                                                                                     | 0.1                                                                |
| C6'                 | 127.0                                                                                                                          | 127.1                                                                                                     | 0.1                                                                |
| C6                  | 126.7                                                                                                                          | 126.7                                                                                                     | 0.0                                                                |
| C7'                 | 104.9                                                                                                                          | 105.0                                                                                                     | 0.1                                                                |
| C7                  | 107.2                                                                                                                          | 107.3                                                                                                     | 0.1                                                                |
| C7a'                | 152.3                                                                                                                          | 152.3                                                                                                     | 0.0                                                                |
| C7a                 | 151.2                                                                                                                          | 151.2                                                                                                     | 0.0                                                                |
| N8'-CH <sub>3</sub> | 34.4                                                                                                                           | 34.5                                                                                                      | 0.1                                                                |
| N8-H                | –                                                                                                                              | –                                                                                                         | 0.0                                                                |
| C8a'                | 91.1                                                                                                                           | 91.1                                                                                                      | 0.0                                                                |
| C8a                 | 84.0                                                                                                                           | 84.1                                                                                                      | 0.1                                                                |

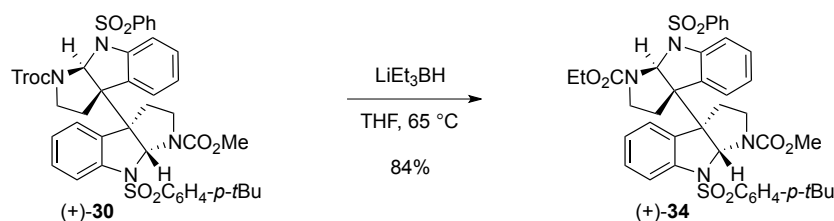

### N1'-Carboxyethyl Heterodimer (+)-34:

A solution of lithium triethylborohydride in tetrahydrofuran (1.0 M, 530  $\mu$ L, 530  $\mu$ mol, 10.0 equiv,) was added via syringe to a solution of heterodimer (+)-**30** (47.0 mg, 52.9  $\mu$ mol, 1 equiv) in tetrahydrofuran (2.70 mL) at 23  $^{\circ}$ C. The reaction flask was fitted with a reflux condenser and heated to 65  $^{\circ}$ C. After 11 h, another portion of lithium triethylborohydride (1.0 M in tetrahydrofuran, 265  $\mu$ L, 265  $\mu$ mol, 5.00 equiv,) was added and the mixture was stirred at 65  $^{\circ}$ C. After 12 h, the yellow solution was allowed to cool to 23  $^{\circ}$ C and a saturated aqueous ammonium chloride solution (10 mL) was added. The resulting suspension was extracted with dichloromethane (3  $\times$  15 mL). The combined organic extracts were washed with brine (10 mL), were dried over anhydrous sodium sulfate, were filtered, and were concentrated under reduced pressure. The resulting residue was purified by flash column chromatography on silica gel (eluent: 10 $\rightarrow$ 25% acetone in hexanes) to afford the N1'-carboxyethyl heterodimer (+)-**34** (35 mg, 84.1%) as a white foam.

As a result of the slow conformational equilibration at ambient temperature, NMR spectra were collected at elevated temperature. Structural assignments were made using additional information from gCOSY, HSQC, and HMBC experiments also collected at elevated temperature.

 $^1\text{H}$  NMR (500 MHz,  $\text{CD}_3\text{CN}$ , 70 °C):

$\delta$  7.88 (d,  $J = 7.5$  Hz, 2H, N<sub>8</sub>SO<sub>2</sub>Ph-*o*-**H**), 7.78 (d,  $J = 8.6$  Hz, 2H, N<sub>8</sub>SO<sub>2</sub>Ar-*o*-**H**), 7.62 (t,  $J = 7.5$  Hz, 1H, N<sub>8</sub>SO<sub>2</sub>Ph-*p*-**H**), 7.57 (d,  $J = 8.8$  Hz, 2H, N<sub>8</sub>SO<sub>2</sub>Ar-*m*-**H**), 7.52 (t, 2H,  $J = 8.0$  Hz, N<sub>8</sub>SO<sub>2</sub>Ph-*m*-**H**), 7.44–7.39 (m, 2H, C<sub>7/7'</sub>**H**), 7.32–7.27 (m, 2H, C<sub>6/6'</sub>**H**), 7.02–6.98 (m, 3H, C<sub>5/5'</sub>**H**, C<sub>4'</sub>**H**), 6.93 (br-s, 1H, C<sub>4</sub>**H**), 6.44 (s, 1H, C<sub>8a</sub>**H**), 6.36 (s, 1H, C<sub>8a</sub>**H**), 4.08 (app-dq,  $J = 7.1, 10.6$  Hz, 1H, N1'CO<sub>2</sub>CH<sub>a</sub>H<sub>b</sub>CH<sub>3</sub>), 3.96 (app-dq,  $J = 7.1, 10.6$  Hz, 1H, N1'CO<sub>2</sub>CH<sub>a</sub>H<sub>b</sub>CH<sub>3</sub>), 3.80–3.76 (m, 2H, C<sub>2/2'</sub>**H<sub>a</sub>**), 3.54 (s, 3H, N<sub>1</sub>CO<sub>2</sub>CH<sub>3</sub>), 2.67–2.56 (m, 2H, C<sub>2/2'</sub>**H<sub>b</sub>**), 2.06 (dd,  $J = 5.1, 12.2$  Hz, 1H, C<sub>3'</sub>**H<sub>a</sub>**), 2.02 (dd,  $J = 5.1, 12.3$  Hz, 1H, C<sub>3</sub>**H<sub>a</sub>**), 1.94–1.84 (m, 2H, C<sub>3/3'</sub>**H<sub>b</sub>**), 1.34 (s, 9H, C(CH<sub>3</sub>)<sub>3</sub>), 1.22 (t,  $J = 7.1$  Hz, 3H, N<sub>1</sub>CO<sub>2</sub>CH<sub>2</sub>CH<sub>3</sub>).

 $^{13}\text{C}$  NMR (125.8 MHz,  $\text{CD}_3\text{CN}$ , 70 °C):

$\delta$  158.9 ( $\text{N}_8\text{SO}_2\text{Ar-}p\text{-C}$ ), 156.1 ( $\text{N}_1\text{CO}_2\text{CH}_3$ ), 155.8 ( $\text{N}_1\text{CO}_2\text{CH}_2\text{CH}_3$ ), 145.2 ( $\text{C}_{7a'}$ ), 145.0 ( $\text{C}_{7a}$ ), 143.1 ( $\text{N}_8\text{SO}_2\text{Ph-}ipso\text{-C}$ ), 140.6 ( $\text{N}_8\text{SO}_2\text{Ar-}ipso\text{-C}$ ), 134.9 ( $\text{N}_8\text{SO}_2\text{Ph-}p\text{-C}$ ), 132.8 (2C,  $\text{C}_{4a}$ ,  $\text{C}_{4a'}$ ), 131.4 (2C,

Application of diazene-directed fragment assembly to the enantioselective total synthesis and stereochemical assignment of (+)-desmethyl-*meso*-chimonanthine and related heterodimeric alkaloids.

Stephen P. Lathrop and Mohammad Movassaghi\*

Page S53 / S153

C<sub>6</sub>, C<sub>6'</sub>), 131.1 (N<sub>8</sub>SO<sub>2</sub>Ph-*m*-C), 128.2 (N<sub>8</sub>SO<sub>2</sub>Ph-*o*-C), 128.1 (N<sub>8</sub>SO<sub>2</sub>Ar-*o*-C/*meta*), 126.5 (C<sub>4</sub>), 126.4 (C<sub>4'</sub>), 125.6 (2C, C<sub>5</sub>, C<sub>5'</sub>), 116.2 (C<sub>7</sub>/C<sub>7'</sub>), 116.0 (C<sub>7</sub>/C<sub>7'</sub>), 82.6 (2C, C<sub>8a</sub>, C<sub>8a'</sub>), 64.2 (2C, C<sub>3a</sub>, C<sub>3a'</sub>), 63.5 (N<sub>1</sub>CO<sub>2</sub>CH<sub>2</sub>CH<sub>3</sub>), 54.0 (N<sub>1</sub>CO<sub>2</sub>CH<sub>3</sub>), 46.9 (2C, C<sub>2</sub>, C<sub>2'</sub>), 37.6 (C<sub>3'</sub>), 37.5 (C<sub>3</sub>), 36.7 (C(CH<sub>3</sub>)<sub>3</sub>), 32.1 (C(CH<sub>3</sub>)<sub>3</sub>), 15.6 (N<sub>1</sub>CO<sub>2</sub>CH<sub>2</sub>CH<sub>3</sub>).

FTIR (thin film) cm<sup>-1</sup>:

2957 (w), 1712 (s), 1595 (w), 1477 (m), 1350 (m).

HRMS (ESI) (*m/z*):

calc'd for C<sub>41</sub>H<sub>44</sub>N<sub>4</sub>NaO<sub>8</sub>S<sub>2</sub> [M+Na]<sup>+</sup>: 807.2493,  
found: 807.2492.

[α]<sub>D</sub><sup>24</sup>:

+6.5 (*c* = 0.31, CH<sub>2</sub>Cl<sub>2</sub>).

TLC (33% ethyl acetate in hexanes), R<sub>f</sub>:

0.29 (UV, CAM).

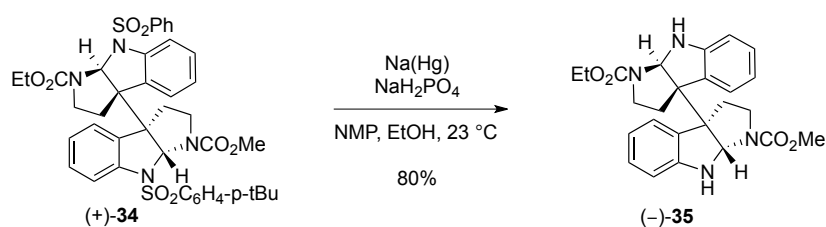

**(-)-N1-Carboxymethyl-N1'-Carboxyethyl *meso*-Chimonanthine (35):**

Sodium amalgam (5%-Na, 58.0 mg, 128  $\mu\text{mol}$ , 20.0 equiv)<sup>8</sup> was added to a suspension of sodium phosphate monobasic monohydrate (19.0 mg, 141.0  $\mu\text{mol}$ , 22.0 equiv) and N1'-carboxyethyl heterodimer (+)-34 (5.0 mg, 6.40  $\mu\text{mol}$ , 1 equiv) in a mixture of ethanol-*N*-methylpyrrolidinone (2:1, 900  $\mu\text{L}$ ) at 23  $^\circ\text{C}$ . After 45 min, another portion of sodium phosphate monobasic monohydrate (19.0 mg, 141  $\mu\text{mol}$ , 22.0 equiv) and sodium amalgam (5%-Na, 58.0 mg, 128  $\mu\text{mol}$ , 20.0 equiv) were added. After an additional 1h, a final portion of sodium phosphate monobasic monohydrate (19.0 mg, 141  $\mu\text{mol}$ , 22.0 equiv) and sodium amalgam (5%-Na, 58.0 mg, 128  $\mu\text{mol}$ , 20.0 equiv) were added. After 1 h, the reaction mixture was diluted with ethyl acetate (10 mL) and was washed with 5% aqueous sodium bicarbonate solution (5 mL). The aqueous phase was separated and extracted with ethyl acetate (2  $\times$  10 mL). The combined organic layers were washed with brine (5 mL), were dried over anhydrous sodium sulfate, were filtered, and were concentrated under reduced pressure. The resulting residue was purified by flash column chromatography on silica gel (eluent: 33 $\rightarrow$ 50% ethyl acetate in hexanes) to afford (-)-N1-carboxymethyl-N1'-carboxyethyl *meso*-chimonanthine (35, 2.3 mg, 80.1%) as a white solid.

As a result of the slow conformational equilibration at ambient temperature, NMR spectra were collected at elevated temperature. Structural assignments were made using additional information from gCOSY, HSQC, and HMBC experiments also collected at elevated temperature.

<sup>1</sup>H NMR (500 MHz CD<sub>3</sub>CN, 75  $^\circ\text{C}$ ):  $\delta$  7.05 (app-t,  $J$  = 7.4 Hz, 2H, C<sub>6</sub>H, C<sub>6</sub>H), 6.69 (d,  $J$  = 7.4 Hz, 1H, C<sub>4</sub>), 6.66 (d,  $J$  = 6.8 Hz, 1H, C<sub>4'</sub>), 6.61–6.57 (m, 2H, C<sub>5</sub>H, C<sub>5</sub>H), 6.53–6.49 (m, 2H, C<sub>7</sub>H, C<sub>7</sub>H), 5.39 (s, 1H), 5.38 (s, 1H), 5.06 (br-s, 2H, N<sub>8</sub>H, N<sub>8</sub>H), 4.13 (q,  $J$  = 6.7, 13.7 Hz, 2H, N<sub>1</sub>CO<sub>2</sub>CH<sub>2</sub>CH<sub>3</sub>), 3.71–3.65 (m, 5H, C<sub>2</sub>H<sub>a</sub>, C<sub>2</sub>H<sub>a</sub>, N<sub>1</sub>CO<sub>2</sub>CH<sub>3</sub>), 2.92–2.84 (m, 2H, C<sub>2</sub>H<sub>b</sub>, C<sub>2</sub>H<sub>b</sub>), 2.40–2.32 (m, 2H, C<sub>3</sub>H<sub>a</sub>, C<sub>3</sub>H<sub>a</sub>), 2.31–2.25 (m, 2H, C<sub>3</sub>H<sub>b</sub>, C<sub>3</sub>H<sub>b</sub>), 1.26 (t,  $J$  = 6.6 Hz, 3H, N<sub>1</sub>CO<sub>2</sub>CH<sub>2</sub>CH<sub>3</sub>).

<sup>13</sup>C NMR (125.8 MHz, CD<sub>3</sub>CN, 75  $^\circ\text{C}$ ):  $\delta$  152.7 (2C, C<sub>7a</sub>, C<sub>7a'</sub>), 131.4 (2C, C<sub>4a</sub>, C<sub>4a'</sub>), 130.6 (2C, C<sub>6</sub>, C<sub>6'</sub>), 126.1 (2C, C<sub>4</sub>, C<sub>4'</sub>), 120.0 (2C, C<sub>5</sub>, C<sub>5'</sub>), 110.7 (2C, C<sub>7</sub>, C<sub>7'</sub>), 79.4 (2C, C<sub>8a</sub>, C<sub>8a'</sub>), 62.7 (N<sub>1</sub>CO<sub>2</sub>CH<sub>2</sub>CH<sub>3</sub>), 53.6 (N<sub>1</sub>CO<sub>2</sub>CH<sub>3</sub>), 46.9 (2C, C<sub>2</sub>, C<sub>2'</sub>), 35.6 (2C, C<sub>3</sub>, C<sub>3'</sub>), 15.9 (N<sub>1</sub>CO<sub>2</sub>CH<sub>2</sub>CH<sub>3</sub>).<sup>15</sup>

<sup>15</sup> The C<sub>3a</sub>, C<sub>3a'</sub>, and the carbonyl carbons of the carbamates were not observed, due to signal broadening even at 75  $^\circ\text{C}$ . All expected signals were observed in the following compound, *meso*-chimonanthine (2).

Application of diazene-directed fragment assembly to the enantioselective total synthesis and stereochemical assignment of (+)-desmethyl-*meso*-chimonanthine and related heterodimeric alkaloids.  
Stephen P. Lathrop and Mohammad Movassaghi\*

Page S55 / S153

|                                             |                                                                                                                  |
|---------------------------------------------|------------------------------------------------------------------------------------------------------------------|
| FTIR (thin film) $\text{cm}^{-1}$ :         | 3360 (br-m), 2953 (w), 1693 (m), 1451 (w), 1381 (w).                                                             |
| HRMS (ESI) ( $m/z$ ):                       | calc'd for $\text{C}_{25}\text{H}_{29}\text{N}_4\text{O}_4$ $[\text{M}+\text{H}]^+$ : 449.2183: found: 449.2182. |
| $[\alpha]_{\text{D}}^{24}$ :                | -6.2 ( $c = 0.20$ , $\text{CH}_2\text{Cl}_2$ ).                                                                  |
| TLC (50% ethyl acetate in hexanes), $R_f$ : | 0.24 (UV, CAM).                                                                                                  |

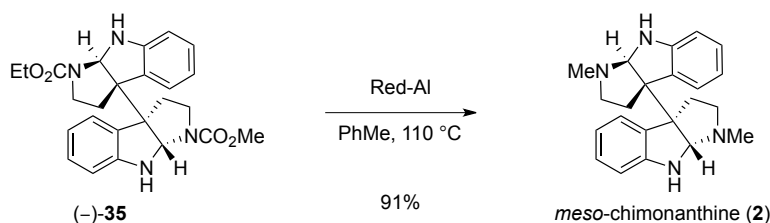

### ***meso*-Chimonanthine (2):**

(-)-N1-Carboxymethyl-N1'-carboxyethyl *meso*-chimonanthine (**35**, 30.0 mg, 66.9  $\mu\text{mol}$ , 1 equiv) was azeotropically dried from anhydrous benzene ( $2 \times 5 \text{ mL}$ ) and the residue was dissolved in toluene (6.5 mL). Sodium bis(2-methoxyethoxy)aluminum hydride in toluene (Red-Al, 70% wt, 193  $\mu\text{L}$ , 670  $\mu\text{mol}$ , 10.0 equiv) was added via syringe at 23  $^\circ\text{C}$ . The reaction flask was fitted with a reflux condenser and heated to 110  $^\circ\text{C}$ . After 1.5 h, the reaction mixture was allowed to cool to 23  $^\circ\text{C}$ . Excess reducing reagent was quenched by the addition of 10% methanol in chloroform saturated with ammonium hydroxide. The resulting mixture was concentrated under reduced pressure. The resulting residue was purified by flash column chromatography on silica gel (eluent: 10% methanol in chloroform saturated with ammonium hydroxide) to afford *meso*-chimonanthine (**2**, 21.0 mg, 90.5%) as a white solid.

As a result of the slow conformational equilibration at ambient temperature, NMR spectra were collected at elevated temperature. Structural assignments were made using additional information from gCOSY, HSQC, and HMBC experiments also collected at elevated temperature.

$^1\text{H}$  NMR (500 MHz,  $\text{CD}_3\text{OD}$ , 55  $^\circ\text{C}$ ):  $\delta$  6.94 (app-t,  $J = 7.2 \text{ Hz}$ , 2H,  $\text{C}_6\text{H}$ ,  $\text{C}_6'\text{H}$ ), 6.47 (br-s, 2H,  $\text{C}_5\text{H}$ ,  $\text{C}_5'\text{H}$ ), 6.45 (d,  $J = 7.8 \text{ Hz}$ ,  $\text{C}_7\text{H}$ ,  $\text{C}_7'\text{H}$ ), 4.54 (s, 2H,  $\text{C}_{8a}\text{H}$ ,  $\text{C}_{8a'}\text{H}$ ), 2.72 (ddd,  $J = 2.3, 6.1, 8.8 \text{ Hz}$ ,  $\text{C}_2\text{H}_a$ ,  $\text{C}_2'\text{H}_a$ ), 2.54–2.46 (m, 2H,  $\text{C}_3\text{H}_a$ ,  $\text{C}_3'\text{H}_a$ ), 2.41 (app-dt,  $J = 5.6, 8.9 \text{ Hz}$ , 2H,  $\text{C}_2\text{H}_b$ ,  $\text{C}_2'\text{H}_b$ ), 2.34 (s, 6H,  $\text{N}_1\text{CH}_3$ ,  $\text{N}_1'\text{CH}_3$ ), 2.05 (ddd,  $J = 2.9, 5.2, 11.8 \text{ Hz}$ , 2H,  $\text{C}_3\text{H}_b$ ,  $\text{C}_3'\text{H}_b$ ).<sup>16</sup>

$^{13}\text{C}$  NMR (125.8 MHz,  $\text{CD}_3\text{OD}$ , 55 $^\circ\text{C}$ ):  $\delta$  153.7 (2C,  $\text{C}_{7a}$ ,  $\text{C}_{7a'}$ ), 134.3 (2C,  $\text{C}_{4a}$ ,  $\text{C}_{4a'}$ ), 129.2 (2C,  $\text{C}_6$ ,  $\text{C}_6'$ ), 125.5 (2C,  $\text{C}_4$ ,  $\text{C}_4'$ ), 118.8 (2C,  $\text{C}_5$ ,  $\text{C}_5'$ ), 109.7 (2C,  $\text{C}_7$ ,  $\text{C}_7'$ ), 84.7 (2C,  $\text{C}_{8a}$ ,  $\text{C}_{8a'}$ ), 65.1 (2C,  $\text{C}_{3a}$ ,  $\text{C}_{3a'}$ ), 53.7 (2C,  $\text{C}_2$ ,  $\text{C}_2'$ ), 37.4 (2C,  $\text{C}_3$ ,  $\text{C}_3'$ ), 36.5 ( $\text{N}_1\text{CH}_3$ ,  $\text{N}_1'\text{CH}_3$ ).

$^1\text{H}$  NMR (500 MHz,  $\text{DMSO}-d_6$ , 120  $^\circ\text{C}$ ):  $\delta$  6.86 (app-t,  $J = 7.7 \text{ Hz}$ , 2H,  $\text{C}_6\text{H}$ ,  $\text{C}_6'\text{H}$ ), 6.54 (br-s, 2H,  $\text{C}_4\text{H}$ ,  $\text{C}_4'\text{H}$ ), 6.40–6.33 (m, 4H,  $\text{C}_5\text{H}$ ,  $\text{C}_5'\text{H}$ ,  $\text{C}_7\text{H}$ ,  $\text{C}_7'\text{H}$ ), 5.45 (s, 1H,  $\text{N}_8\text{H}$ ,  $\text{N}_8'\text{H}$ ), 4.58 (s, 2H,  $\text{C}_{8a}\text{H}$ ,  $\text{C}_{8a'}\text{H}$ ), 2.69 (ddd,  $J = 1.8, 6.8, 8.8 \text{ Hz}$ ,  $\text{C}_2\text{H}_a$ ,  $\text{C}_2'\text{H}_a$ ), 2.48–2.43 (m, 2H,  $\text{C}_3\text{H}_a$ ,  $\text{C}_3'\text{H}_a$ ), 2.35–2.32 (m, 2H,

<sup>16</sup> The  $\text{C}_4\text{H}$  and  $\text{C}_{4a}\text{H}$  were not observed, due to signal broadening even at 55  $^\circ\text{C}$ . All expected signals were observed in  $\text{DMSO}-d_6$  at 120  $^\circ\text{C}$ .



Application of diazene-directed fragment assembly to the enantioselective total synthesis and stereochemical assignment of (+)-desmethyl-*meso*-chimonanthine and related heterodimeric alkaloids.

Stephen P. Lathrop and Mohammad Movassaghi\*

Page S57 / S153

$C_2H_b, C_2'H_b$ ), 2.30 (s, 6H,  $N_1CH_3, N_1'CH_3$ ), 1.88 (ddd,  $J = 1.8, 5.5, 11.6$  Hz, 2H,  $C_3H_b, C_3'H_b$ ).

$^{13}C$  NMR (125.8 MHz, DMSO- $d_6$ , 120°C):  $\delta$  151.9 (2C,  $C_{7a}, C_{7a'}$ ), 132.3 (2C,  $C_{4a}, C_{4a'}$ ), 126.7 (2C,  $C_6, C_{6'}$ ), 123.1 (2C,  $C_4, C_{4'}$ ), 115.4 (2C,  $C_5, C_{5'}$ ), 106.7 (2C,  $C_7, C_{7'}$ ), 82.5 (2C  $C_{8a}, C_{8a'}$ ), 62.6 (2C,  $C_{3a}, C_{3a'}$ ), 51.1 (2C,  $C_2, C_{2'}$ ), 36.1 (2C,  $C_3, C_{3'}$ ), 34.8 ( $N_1CH_3, N_1'CH_3$ ).

FTIR (thin film)  $cm^{-1}$ : 3380 (w), 2929 (w), 1604 (m), 1485 (m), 1347 (w).

HRMS (ESI) ( $m/z$ ): calc'd for  $C_{22}H_{27}N_4$   $[M+H]^+$ : 347.223, found: 347.2232.

TLC (18% methanol, 2% ammonium hydroxide in chloroform),  $R_f$ : 0.3 (UV, CAM).

**Table S5. Comparison of our  $^1\text{H}$  NMR data for *meso*-chimonanthine (2) with literature data ( $\text{CD}_3\text{OD}$ ):**

| Assignment                              | Overman's Report <sup>17</sup><br><i>meso</i> -chimonanthine<br>$^1\text{H}$ NMR, 500 MHz<br>$\text{CD}_3\text{OD}$ | This Work<br><i>meso</i> -chimonanthine<br>$^1\text{H}$ NMR, 500 MHz<br>$\text{CD}_3\text{OD}$ , 55 °C |
|-----------------------------------------|---------------------------------------------------------------------------------------------------------------------|--------------------------------------------------------------------------------------------------------|
| N1-CH <sub>3</sub> /N1'-CH <sub>3</sub> | 2.30 (br-s, 6H)                                                                                                     | 2.34 (s, 6H)                                                                                           |
| C2/2'                                   | 2.49 (br-m, 4H)                                                                                                     | 2.72 (ddd, $J = 2.3, 6.1, 8.8$ Hz, 2H)<br>2.41 (app-dt, $J = 5.6, 8.9$ Hz, 2H)                         |
| C3/3'                                   | 2.02 (br-m, 4H)                                                                                                     | 2.54–2.46 (m, 2H)<br>2.05 (ddd, $J = 2.9, 5.2, 11.8$ Hz, 2H)                                           |
| C3a/3a'                                 | –                                                                                                                   | –                                                                                                      |
| C4a/4a'                                 | –                                                                                                                   | –                                                                                                      |
| C4/4'                                   | 6.89 (br-s, 4H)                                                                                                     | – <sup>16</sup>                                                                                        |
| C5/5'                                   | 6.39 (d, $J = 7.7$ Hz, 4H)                                                                                          | 6.47 (br-s, 2H)                                                                                        |
| C6/6'                                   | 6.89 (br-s, 4H)                                                                                                     | 6.94 (app-t, $J = 7.2$ Hz, 2H)                                                                         |
| C7/7'                                   | 6.39 (d, $J = 7.7$ Hz, 4H)                                                                                          | 6.45 (d, $J = 7.8$ Hz, 2H)                                                                             |
| C7a/7a'                                 | –                                                                                                                   | –                                                                                                      |
| N8/8'                                   | 4.38 (br-s, 2H)                                                                                                     | – <sup>18</sup>                                                                                        |
| C8a/8a'                                 | 2.67 (br-s, 2H)                                                                                                     | 4.54 (br-s, 2H) <sup>19</sup>                                                                          |

<sup>17</sup> J. T. Link and L. E. Overman *J. Am. Chem. Soc.* 1996, **118**, 8166.

<sup>18</sup> The resonance for this proton is not observed due to rapid deuterium exchange in  $\text{CD}_3\text{OD}$ . However, all expected signals are observed in  $\text{DMSO}-d_6$ , see Table S7.

<sup>19</sup> Our assignment of these resonances is supported by key HSCQ and HMBC correlations.

Application of diazene-directed fragment assembly to the enantioselective total synthesis and stereochemical assignment of (+)-desmethyl-*meso*-chimonanthine and related heterodimeric alkaloids.  
Stephen P. Lathrop and Mohammad Movassaghi\*

**Table S6. Comparison of <sup>13</sup>C NMR data of *meso*-chimonanthine (2) with literature data (CD<sub>3</sub>OD):**

| Assignment     | Overman's Report <sup>17</sup><br><i>meso</i> -chimonanthine<br><sup>1</sup> H NMR, 500 MHz<br>CD <sub>3</sub> OD | This Work<br><i>meso</i> -chimonanthine<br><sup>1</sup> H NMR, 500 MHz<br>CD <sub>3</sub> OD, 55 °C | Chemical Shift<br>Difference<br>Δδ = δ (this work) – δ<br>(ref 17) |
|----------------|-------------------------------------------------------------------------------------------------------------------|-----------------------------------------------------------------------------------------------------|--------------------------------------------------------------------|
| N1-CH3/N1'-CH3 | –                                                                                                                 | 36.5 <sup>19</sup>                                                                                  | –                                                                  |
| C2/2'          | 53.5                                                                                                              | 53.7                                                                                                | 0.2                                                                |
| C3/3'          | 37.1                                                                                                              | 37.4                                                                                                | 0.3                                                                |
| C3a/3a'        | 64.8                                                                                                              | 65.1                                                                                                | 0.3                                                                |
| C4a/4a'        | 133.8                                                                                                             | 134.3                                                                                               | 0.5                                                                |
| C4/4'          | 125.4                                                                                                             | 125.5                                                                                               | 0.1                                                                |
| C5/5'          | 118.6                                                                                                             | 118.8                                                                                               | 0.2                                                                |
| C6/6'          | 129.1                                                                                                             | 129.2                                                                                               | 0.1                                                                |
| C7/7'          | 109.4                                                                                                             | 109.7                                                                                               | 0.3                                                                |
| C7a/7a'        | 153.5                                                                                                             | 153.7                                                                                               | 0.2                                                                |
| N8/8'          | –                                                                                                                 | –                                                                                                   | –                                                                  |
| C8a/8a'        | 84.2                                                                                                              | 84.7                                                                                                | 0.4                                                                |

Application of diazene-directed fragment assembly to the enantioselective total synthesis and stereochemical assignment of (+)-desmethyl-*meso*-chimonanthine and related heterodimeric alkaloids.

Stephen P. Lathrop and Mohammad Movassaghi\*

Page S60 / S153

**Table S7. Comparison of our  $^1\text{H}$  NMR data for *meso*-chimonanthine (2) with literature data ( $\text{DMSO}-d_6$ ):**

| Assignment     | Willis's Report <sup>20</sup><br><i>meso</i> -chimonanthine<br>$^1\text{H}$ NMR, 500 MHz<br>$\text{DMSO}-d_6$ , 120 °C | This Work<br><i>meso</i> -chimonanthine<br>$^1\text{H}$ NMR, 500 MHz<br>$\text{DMSO}-d_6$ , 120 °C |
|----------------|------------------------------------------------------------------------------------------------------------------------|----------------------------------------------------------------------------------------------------|
| N1-CH3/N1'-CH3 | 2.28 (s, 6H)                                                                                                           | 2.30 (s, 6H)                                                                                       |
| C2/2'          | 2.74–2.64 (m, 2H)<br>2.52–2.43 (m, 2H)                                                                                 | 2.69 (ddd, $J = 1.8, 6.8, 8.8$ Hz, 2H)<br>2.35–2.31 (m, 2H) <sup>21</sup>                          |
| C3/3'          | 2.37–2.29 (m, 2H)<br>1.92–1.86 (m, 2H)                                                                                 | 2.48–2.43 (m, 2H) <sup>21</sup><br>1.88 (ddd, $J = 1.8, 5.5, 11.6$ Hz, 2H)                         |
| C3a/3a'        | –                                                                                                                      | –                                                                                                  |
| C4a/4a'        | –                                                                                                                      | –                                                                                                  |
| C4/4'          | 6.55 (br-s, 2H)                                                                                                        | 6.54 (br-s, 2H)                                                                                    |
| C5/5'          | 6.40–6.34 (m, 2H)                                                                                                      | 6.40–6.33 (m, 2H)                                                                                  |
| C6/6'          | 6.87 (dd, $J = 7.6, 7.5$ Hz, 2H)                                                                                       | 6.86 (app-t, $J = 7.7$ Hz, 2H)                                                                     |
| C7/7'          | 6.40–6.34 (m, 2H)                                                                                                      | 6.40–6.33 (m, 2H)                                                                                  |
| C7a/7a'        | –                                                                                                                      | –                                                                                                  |
| N8/8'          | 5.49 (br-s, 2H)                                                                                                        | 5.45 (br-s, 2H)                                                                                    |
| C8a/8a'        | 4.58 (s, 2H)                                                                                                           | 4.58 (s, 2H)                                                                                       |

<sup>20</sup> R. H. Snell, R. L. Woodward, and M. C. Willis, *Angew. Chem., Int. Ed.* 2011, **50**, 9116.

<sup>21</sup> Our assignment of these resonances is supported by key gCOSY, HSCQ, and HMBC correlations.

Application of diazene-directed fragment assembly to the enantioselective total synthesis and stereochemical assignment of (+)-desmethyl-*meso*-chimonanthine and related heterodimeric alkaloids.

Stephen P. Lathrop and Mohammad Movassaghi\*

Page S61 / S153

**Table S8. Comparison of  $^{13}\text{C}$  NMR data of *meso*-chimonanthine (2) with literature data (DMSO- $d_6$ ):**

| Assignment                              | Willis's Report <sup>20</sup><br><i>meso</i> -chimonanthine<br>$^1\text{H}$ NMR, 500 MHz<br>DMSO- $d_6$ , 120 °C | This Work<br><i>meso</i> -chimonanthine<br>$^1\text{H}$ NMR, 500 MHz<br>DMSO- $d_6$ , 120 °C | Chemical Shift<br>Difference<br>$\Delta\delta = \delta$ (this work) – $\delta$<br>(ref 20) |
|-----------------------------------------|------------------------------------------------------------------------------------------------------------------|----------------------------------------------------------------------------------------------|--------------------------------------------------------------------------------------------|
| N1-CH <sub>3</sub> /N1'-CH <sub>3</sub> | 22.6 <sup>22</sup>                                                                                               | 34.8                                                                                         | 12.2                                                                                       |
| C2/2'                                   | 52.2                                                                                                             | 51.1                                                                                         | -1.1                                                                                       |
| C3/3'                                   | 35.9                                                                                                             | 36.1                                                                                         | 0.2                                                                                        |
| C3a/3a'                                 | 63.7                                                                                                             | 62.6                                                                                         | -1.1                                                                                       |
| C4a/4a'                                 | 133.5                                                                                                            | 132.3                                                                                        | -1.2                                                                                       |
| C4/4'                                   | 124.3                                                                                                            | 123.1                                                                                        | -1.2                                                                                       |
| C5/5'                                   | 116.7                                                                                                            | 115.4                                                                                        | -1.3                                                                                       |
| C6/6'                                   | 127.8                                                                                                            | 126.7                                                                                        | -1.1                                                                                       |
| C7/7'                                   | 107.8                                                                                                            | 106.7                                                                                        | -1.1                                                                                       |
| C7a/7a'                                 | 153.1                                                                                                            | 151.9                                                                                        | -1.2                                                                                       |
| N8/8'                                   | –                                                                                                                | –                                                                                            | –                                                                                          |
| C8a/8a'                                 | 83.6                                                                                                             | 82.5                                                                                         | -1.1                                                                                       |

<sup>22</sup> The reported signal at 22.6 ppm is not visible in the  $^{13}\text{C}$  NMR spectrum of *meso*-chimonanthine provided in ref 20; however, in the same spectrum an unreported peak is observed at ~35 ppm consistent with our observation.

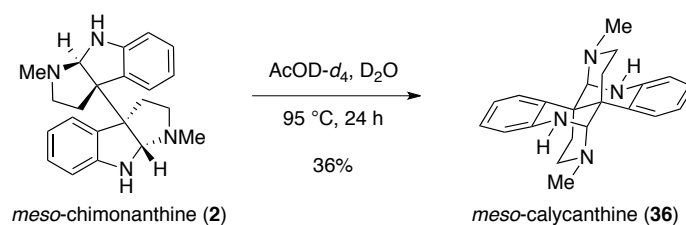

### ***meso*-Calycanthine (36):**

A solution of *meso*-chimonanthine (**2**, 20.0 mg, 57.7  $\mu$ mol, 1 equiv) in a mixture of acetic acid- $d_4$  (17  $\mu$ L, 0.43 M) in deuterium oxide (700  $\mu$ L) was placed in a standard NMR tube, capped with a plastic cap, sealed with Teflon tape, and heated to 95  $^{\circ}$ C. After 24 h, the mixture was allowed to cool to 23  $^{\circ}$ C and partitioned between dichloromethane (10 mL) and saturated aqueous sodium bicarbonate solution (10 mL). The layers were separated, and the aqueous layer was extracted with dichloromethane (2  $\times$  10 mL). The combined organic layers were washed with brine (5 mL), were dried over anhydrous sodium sulfate, were filtered, and were concentrated under reduced pressure. The resulting residue was purified by flash column chromatography on silica gel (eluent: 4.5% methanol, 0.5% ammonium hydroxide  $\rightarrow$  9% methanol, 1% ammonium hydroxide in chloroform) to afford *meso*-calycanthine (**36**, 7.2 mg, 36.0 %) as a white solid. Structural assignments were made using additional information from gCOSY, HSQC, and HMBC experiments.

$^1\text{H}$  NMR (500 MHz,  $\text{CD}_2\text{Cl}_2$ , 20  $^{\circ}$ C):  $\delta$  7.03–6.96 (m, 4H,  $\text{C}_{6/6'}\text{H}$ ,  $\text{C}_{4/4'}\text{H}$ ), 6.66 (dt,  $J$  = 1.3, 7.4 Hz, 2H,  $\text{C}_{5/5'}\text{H}$ ), 6.57 (dd,  $J$  = 0.8, 7.9 Hz, 2H,  $\text{C}_{7/7'}\text{H}$ ), 4.94 (br-s, 2H,  $\text{N}_{8/8'}\text{H}$ ), 4.28 (d,  $J$  = 3.8 Hz, 2H,  $\text{C}_{8a/8a'}\text{H}$ ), 2.36 (dd,  $J$  = 2.1, 7.9 Hz, 2H,  $\text{C}_{2/2'}\text{H}_a$ ), 2.29 (s, 6H,  $\text{N}_{1/1'}\text{CH}_3$ ), 2.20–2.09 (m, 4H,  $\text{C}_{2/2'}\text{H}_b$ ,  $\text{C}_{3/3'}\text{H}_a$ ), 1.20–1.11 (m, 2H,  $\text{C}_{3/3'}\text{H}_b$ ).

$^{13}\text{C}$  NMR (125.8 MHz,  $\text{CD}_2\text{Cl}_2$ , 20  $^{\circ}$ C):  $\delta$  145.3 (2C,  $\text{C}_{7a}$ ,  $\text{C}_{7a'}$ ), 127.0 (2C,  $\text{C}_{4/6}$ ,  $\text{C}_{4'/6'}$ ), 126.9 (2C,  $\text{C}_{4/6}$ ,  $\text{C}_{4'/6'}$ ), 125.0 (2C,  $\text{C}_{4a}$ ,  $\text{C}_{4a'}$ ), 117.5 (2C,  $\text{C}_5$ ,  $\text{C}_{5'}$ ), 112.4 (2C,  $\text{C}_7$ ,  $\text{C}_{7'}$ ), 71.2 (2C,  $\text{C}_{8a}$ ,  $\text{C}_{8a'}$ ), 46.5 (2C,  $\text{C}_2$ ,  $\text{C}_{2'}$ ), 42.4 ( $\text{N}_1\text{CH}_3$ ,  $\text{N}_{1'}\text{CH}_3$ ), 37.3 (2C,  $\text{C}_{3a}$ ,  $\text{C}_{3a'}$ ), 34.6 (2C,  $\text{C}_3$ ,  $\text{C}_{3'}$ ).

FTIR (thin film)  $\text{cm}^{-1}$ : 3438 (w br), 2964 (w), 1608 (m), 1487 (m), 1304 (w).

HRMS (ESI) ( $m/z$ ): calc'd for  $\text{C}_{22}\text{H}_{27}\text{N}_4$   $[\text{M}+\text{H}]^+$ : 347.2230, found: 347.2214.

TLC (18% methanol, 2% ammonium hydroxide in chloroform),  $R_f$ : 0.63 (UV, CAM).

Application of diazene-directed fragment assembly to the enantioselective total synthesis and stereochemical assignment of (+)-desmethyl-*meso*-chimonanthine and related heterodimeric alkaloids.  
Stephen P. Lathrop and Mohammad Movassaghi\*

**Table S9. Comparison of <sup>1</sup>H NMR data of *meso*-calycanthine (36) with literature data:**

| Assignment                              | Overman’s Report <sup>17</sup><br><i>meso</i> -chimonanthine<br><sup>1</sup> H NMR, 500 MHz<br>CD <sub>2</sub> Cl <sub>2</sub> | This Work<br><i>meso</i> -chimonanthine<br><sup>1</sup> H NMR, 500 MHz<br>CD <sub>2</sub> Cl <sub>2</sub> , 20 °C |
|-----------------------------------------|--------------------------------------------------------------------------------------------------------------------------------|-------------------------------------------------------------------------------------------------------------------|
| N1-CH <sub>3</sub> /N1'-CH <sub>3</sub> | 2.27 (s, 3H)                                                                                                                   | 2.29 (s, 1H)                                                                                                      |
| C2/2'                                   | 2.33 (m, 2H)<br>2.11 (m, 4H)                                                                                                   | 2.36 (dd, <i>J</i> = 2.1, 7.9 Hz, 2H)<br>2.20–2.09 (m, 4H)                                                        |
| C3/3'                                   | 2.11 (m, 4H)<br>1.14 (m, 2H)                                                                                                   | 2.20–2.09 (m, 4H)<br>1.20–1.11 (m, 2H)                                                                            |
| C3a/3a'                                 | –                                                                                                                              | –                                                                                                                 |
| C4a/4a'                                 | –                                                                                                                              | –                                                                                                                 |
| C4/4'                                   | 6.97 (m, 4H)                                                                                                                   | 7.03–6.96 (m, 4H)                                                                                                 |
| C5/5'                                   | 6.63 (t, <i>J</i> = 7.5 Hz, 2H)                                                                                                | 6.66 (app-dt, <i>J</i> = 1.3, 7.4 Hz, 2H)                                                                         |
| C6/6'                                   | 6.97 (m, 4H)                                                                                                                   | 7.03–6.96 (m, 4H)                                                                                                 |
| C7/7'                                   | 6.54 (d, <i>J</i> = 7.9 Hz, 2H)                                                                                                | 6.57 (dd, <i>J</i> = 0.8, 7.9 Hz, 2H)                                                                             |
| C7a/7a'                                 | –                                                                                                                              | –                                                                                                                 |
| N8/8'                                   | 4.91 (s, 2H)                                                                                                                   | 4.94 (br-s, 2H)                                                                                                   |
| C8a/8a'                                 | 4.25 (s, 2H)                                                                                                                   | 4.28 (d, <i>J</i> = 3.8 Hz, 2H)                                                                                   |

Application of diazene-directed fragment assembly to the enantioselective total synthesis and stereochemical assignment of (+)-desmethyl-*meso*-chimonanthine and related heterodimeric alkaloids.  
Stephen P. Lathrop and Mohammad Movassaghi\*

**Table S10. Comparison of <sup>13</sup>C NMR data of *meso*-calycanthine (36) with literature data:**

| Assignment                              | Overman's Report <sup>17</sup><br><i>meso</i> -chimonanthine<br><sup>1</sup> H NMR, 500 MHz<br>CD <sub>2</sub> Cl <sub>2</sub> | This Work<br><i>meso</i> -chimonanthine<br><sup>1</sup> H NMR, 500 MHz<br>CD <sub>2</sub> Cl <sub>2</sub> , 20 °C | Chemical Shift<br>Difference<br>Δδ = δ (this work) – δ<br>(ref 17) |
|-----------------------------------------|--------------------------------------------------------------------------------------------------------------------------------|-------------------------------------------------------------------------------------------------------------------|--------------------------------------------------------------------|
| N1-CH <sub>3</sub> /N1'-CH <sub>3</sub> | 42.2                                                                                                                           | 42.4                                                                                                              | 0.2                                                                |
| C2/2'                                   | 46.3                                                                                                                           | 46.3                                                                                                              | 0.0                                                                |
| C3/3'                                   | 34.4                                                                                                                           | 34.6                                                                                                              | 0.2                                                                |
| C3a/3a'                                 | 37.2                                                                                                                           | 37.3                                                                                                              | 0.1                                                                |
| C4a/4a'                                 | 124.9                                                                                                                          | 125.0                                                                                                             | 0.1                                                                |
| C4/4'                                   | 126.9 or 126.7                                                                                                                 | 127.0 or 126.9                                                                                                    | 0.0–0.3                                                            |
| C5/5'                                   | 117.4                                                                                                                          | 117.5                                                                                                             | 0.1                                                                |
| C6/6'                                   | 126.9 or 126.7                                                                                                                 | 127.0 or 126.9                                                                                                    | 0.0–0.3                                                            |
| C7/7'                                   | 112.3                                                                                                                          | 112.4                                                                                                             | 0.1                                                                |
| C7a/7a'                                 | 145.1                                                                                                                          | 145.3                                                                                                             | 0.2                                                                |
| N8/8'                                   | –                                                                                                                              | –                                                                                                                 | –                                                                  |
| C8a/8a'                                 | 71.1                                                                                                                           | 71.2                                                                                                              | 0.1                                                                |



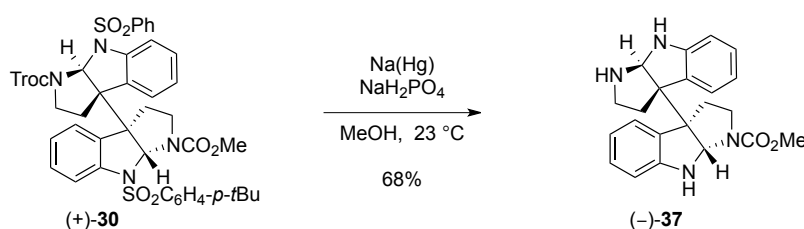

**(-)-N1-Carboxymethyl Desmethyl-*meso*-Chimonanthine (37):**

Sodium amalgam (5%-Na, 583 mg, 1.27 mmol, 25.0 equiv)<sup>8</sup> was added to a suspension of sodium phosphate monobasic monohydrate (196 mg, 1.43 mmol, 28.0 equiv) and heterodimer (+)-30 (45.0 mg, 50.7  $\mu\text{mol}$ , 1 equiv) in methanol at 23  $^\circ\text{C}$ . After 1 h, another portion of sodium phosphate monobasic monohydrate (84.0 mg, 612  $\mu\text{mol}$ , 12.0 equiv) and sodium amalgam (5%-Na, 235 mg, 510  $\mu\text{mol}$ , 10.0 equiv) were added sequentially. After an additional 1 h, the reaction mixture was diluted with ethyl acetate (20 mL) and washed with a 5% aqueous sodium bicarbonate solution (10 mL). The aqueous phase was separated and extracted with ethyl acetate (2  $\times$  20 mL). The combined organic layers were washed with brine (10 mL), were dried over anhydrous sodium sulfate, were filtered, and were concentrated under reduced pressure. The resulting residue was purified by flash column chromatography on silica gel (eluent: 9% methanol, 1.0% ammonium hydroxide  $\rightarrow$  18% methanol, 2.0% ammonium hydroxide in chloroform) to afford the heterodimer (-)-N1-carboxymethyl desmethyl-*meso*-chimonanthine (37, 13.0 mg, 67.7%) as a white solid.

As a result of the slow conformational equilibration at ambient temperature, NMR spectra were collected at elevated temperature. Structural assignments were made using additional information from gCOSY, HSQC, and HMBC experiments also collected at elevated temperature.

<sup>1</sup>H NMR (500 MHz, CD<sub>3</sub>CN, 75  $^\circ\text{C}$ ):

$\delta$  7.04 (app-t,  $J$  = 7.6 Hz, 1H, C<sub>6</sub>H), 6.96 (app-t,  $J$  = 8.5 Hz, 1H, C<sub>6</sub>H), 6.77 (d,  $J$  = 13.1 Hz, 1H, C<sub>4</sub>H), 6.59 (app-t,  $J$  = 7.4 Hz, 1H, C<sub>5</sub>H), 6.52–6.46 (m, 3H, C<sub>5</sub>H, C<sub>7</sub>H, C<sub>4</sub>H), 6.44 (d,  $J$  = 7.8 Hz, 1H, C<sub>7</sub>H), 5.32 (s, 1H, C<sub>8a</sub>H), 5.01 (br-s, 1H, NH), 4.92 (s, 1H, C<sub>8a</sub>H), 3.74–3.67 (m, 1H C<sub>2</sub>H<sub>a</sub>), 3.69 (s, 3H, N<sub>1</sub>CO<sub>2</sub>CH<sub>3</sub>), 3.00 (dd,  $J$  = 6.9, 10.3 Hz, 1H, C<sub>2</sub>H<sub>a</sub>), 2.94 (app-dt,  $J$  = 6.3, 11.1 Hz, 1H, C<sub>2</sub>H<sub>b</sub>), 2.58 (app-dt,  $J$  = 5.3, 10.9 Hz, 1H, C<sub>2</sub>H<sub>b</sub>), 2.47 (app-dt,  $J$  = 8.3, 12.1 Hz, 1H, C<sub>3</sub>H<sub>a</sub>), 2.40–2.05 (br-s, 1H, N<sub>1</sub>H), 2.32 (dd,  $J$  = 6.2, 12.4 Hz, 1H, C<sub>3</sub>H<sub>b</sub>), 2.18 (app-dt,  $J$  = 6.7, 11.7 Hz, 1H, C<sub>3</sub>H<sub>a</sub>), 2.07 (dd,  $J$  = 5.2, 11.8 Hz, 1H, C<sub>3</sub>H<sub>b</sub>).

<sup>13</sup>C NMR (125.8 MHz, CD<sub>3</sub>CN, 75  $^\circ\text{C}$ ):

$\delta$  155.6 (N<sub>1</sub>CO<sub>2</sub>CH<sub>3</sub>), 154.1 (C<sub>7a</sub>'), 152.7 (C<sub>7a</sub>), 133.1 (C<sub>4a</sub>'), 132.6 (C<sub>4a</sub>), 130.3 (C<sub>6</sub>), 129.9 (C<sub>6</sub>'), 126.4 (C<sub>4</sub>'), 126.1 (C<sub>4</sub>), 119.8 (C<sub>5</sub>), 119.2 (C<sub>5</sub>'), 110.4 (C<sub>7</sub>), 109.7 (C<sub>7</sub>'), 81.9 (C<sub>8a</sub>'), 79.8 (C<sub>8a</sub>), 65.7

Application of diazene-directed fragment assembly to the enantioselective total synthesis and stereochemical assignment of (+)-desmethyl-*meso*-chimonanthine and related heterodimeric alkaloids.  
Stephen P. Lathrop and Mohammad Movassaghi\*

Page S66 / S153

(2C, C<sub>3a</sub>, C<sub>3a'</sub>), 53.5 (N<sub>1</sub>CO<sub>2</sub>CH<sub>3</sub>), 47.2 (C<sub>2'</sub>), 46.8 (C<sub>2</sub>), 40.3 (C<sub>3'</sub>), 36.2 (C<sub>3</sub>).

FTIR (thin film) cm<sup>-1</sup>: 3350 (br-m), 2954 (w), 1692 (s), 1606 (w), 1451 (m), 1385 (w).

HRMS (ESI) (*m/z*): calc'd for C<sub>22</sub>H<sub>25</sub>N<sub>4</sub>O<sub>2</sub> [M+H]<sup>+</sup>: 377.1972, found: 377.1976

[α]<sub>D</sub><sup>24</sup>: -223 (*c* = 0.32, CH<sub>2</sub>Cl<sub>2</sub>).

TLC (10% methanol in chloroform), R<sub>f</sub>: 0.18 (UV, CAM).

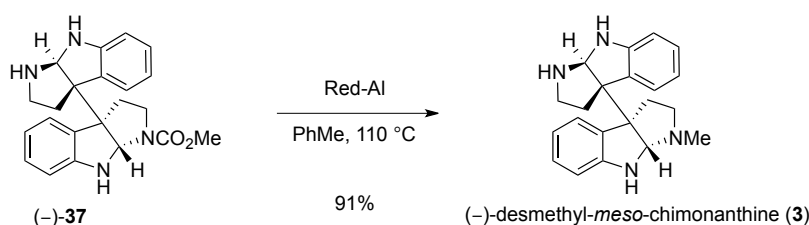

### **(-)-Desmethyl-*meso*-Chimonanthine (**3**):**

(-)-N1-Carboxymethyl-N1'-desmethyl-*meso*-chimonanthine (**37**, 20.0 mg, 53.1  $\mu\text{mol}$ , 1 equiv) was azeotropically dried from anhydrous benzene ( $2 \times 5 \text{ mL}$ ) and the residue was dissolved in toluene (5.0 mL). A solution of sodium bis(2-methoxyethoxy)aluminum hydride in toluene (Red-Al, 70% wt, 153  $\mu\text{L}$ , 530  $\mu\text{mol}$ , 10.0 equiv) was added via syringe at 23  $^\circ\text{C}$ . The reaction flask was fitted with a reflux condenser and heated to 110  $^\circ\text{C}$ . After 1.5 h, the reaction mixture was allowed to cool to 23  $^\circ\text{C}$ . Excess reducing reagent was quenched by the addition of 10% methanol in chloroform saturated with ammonium hydroxide and then concentrated under reduced pressure. The resulting residue was purified by flash column chromatography on silica gel (eluent: gradient, 10% methanol in chloroform  $\rightarrow$  10% methanol in chloroform saturated with ammonium hydroxide) to afford (-)-desmethyl-*meso*-chimonanthine (**3**, 16.0 mg, 90.8%) as a white solid.

As a result of the slow conformational equilibration at ambient temperature, NMR spectra were collected at elevated temperature. Structural assignments were made using additional information from gCOSY, HSQC, and HMBC experiments also collected at elevated temperature.

#### Characterization in $\text{CDCl}_3$ at 50 $^\circ\text{C}$ <sup>23</sup>:

$^1\text{H}$  NMR (500 MHz,  $\text{CDCl}_3$ , 50  $^\circ\text{C}$ ):

$\delta$  7.04–6.91 (m, 2H,  $\text{C}_6\text{H}$ ,  $\text{C}_6'\text{H}$ ), 6.64–6.50 (m, 4H,  $\text{C}_5\text{H}$ ,  $\text{C}_5'\text{H}$ ,  $\text{C}_4\text{H}$ ,  $\text{C}_4'\text{H}$ ), 6.46 (app t,  $J = 7.1 \text{ Hz}$ , 4H,  $\text{C}_7\text{H}$ ,  $\text{C}_7'\text{H}$ ), 5.02 (br-s, 1H,  $\text{C}_{8a}\text{H}$ ), 4.57 (br-s, 1H,  $\text{C}_{8a}\text{H}$ ), 3.07 (dd,  $J = 6.7, 10.6 \text{ Hz}$ , 1H,  $\text{C}_2\text{H}_a$ ), 2.78 (ddd,  $J = 1.9, 6.6, 8.5 \text{ Hz}$ , 1H,  $\text{C}_2\text{H}_a$ ), 2.72 (app-dt,  $J = 5.1, 11.1 \text{ Hz}$ , 1H,  $\text{C}_2\text{H}_b$ ), 2.52–2.39 (m, 2H,  $\text{C}_2\text{H}_b$ ,  $\text{C}_3\text{H}_a$ ), 2.37 (s, 3H,  $\text{N}_1\text{CH}_3$ ), 2.31 (app-dt,  $J = 6.9, 11.8 \text{ Hz}$ , 1H,  $\text{C}_3\text{H}_a$ ), 2.15 (dd,  $J = 5.1, 11.9 \text{ Hz}$ , 2H,  $\text{C}_3\text{H}_b$ ), 2.10–2.04 (m, 1H,  $\text{C}_3\text{H}_b$ ).

$^{13}\text{C}$  NMR (125.8 MHz,  $\text{CDCl}_3$ , 50  $^\circ\text{C}$ ):

$\delta$  152.0 (2C,  $\text{C}_{7a}$ ,  $\text{C}_{7a'}$ ), 133.4 ( $\text{C}_{4a}$ ), 132.2 ( $\text{C}_{4a'}$ ), 128.4 (2C,  $\text{C}_6$ ,  $\text{C}_6'$ ), 124.9 ( $\text{C}_{4/4'}$ ), 124.6 ( $\text{C}_{4/4'}$ ), 118.7 (2C,  $\text{C}_5$ ,  $\text{C}_5'$ ), 109.1 ( $\text{C}_{7/7'}$ ), 108.8 ( $\text{C}_{7/7'}$ ), 83.9 ( $\text{C}_{8a}$ ), 80.4 ( $\text{C}_{8a}$ ), 64.7 ( $\text{C}_{3a'}$ ), 64.0 ( $\text{C}_{3a}$ ), 52.5 ( $\text{C}_2$ ), 45.8 ( $\text{C}_2$ ), 38.7 ( $\text{C}_3$ ), 37.1 ( $\text{C}_3$ ), 35.9 ( $\text{N}_1\text{CH}_3$ ).

#### Characterization in $\text{DMSO}-d_6$ at 50 $^\circ\text{C}$ <sup>24</sup>

<sup>23</sup> We found data collection in  $\text{CDCl}_3$  at 50  $^\circ\text{C}$  provided optimal resolution for  $^{13}\text{C}$  and  $^1\text{H}$  NMR.

<sup>24</sup>  $^1\text{H}$  and  $^{13}\text{C}$  NMR were also obtained in  $\text{DMSO}-d_6$  for comparison with other natural products synthesized in this report.

<sup>1</sup>H NMR (500 MHz, DMSO-*d*<sub>6</sub>, 100 °C): δ 6.90–6.84 (m, 2H, C<sub>6</sub>H, C<sub>6'</sub>H), 6.63 (br-s, 1H, C<sub>4</sub>H), 6.45–6.30 (m, 5H, C<sub>4'</sub>H, C<sub>5</sub>H, C<sub>5'</sub>H, C<sub>7</sub>H, C<sub>7'</sub>H), 5.52 (s, 1H, N<sub>8</sub>H), 5.40 (s, 1H, N<sub>8'</sub>H), 4.92 (s, 1H, C<sub>8a</sub>H), 4.51 (s, 1H, C<sub>8a'</sub>H), 2.97 (app-t, *J* = 9.1 Hz, 1H, C<sub>2'</sub>H<sub>a</sub>), 2.69 (app-t, *J* = 7.6 Hz, 1H, C<sub>2</sub>H<sub>a</sub>), 2.45–2.25 (m, 4H, C<sub>2</sub>H<sub>b</sub>, C<sub>2'</sub>H<sub>b</sub>, C<sub>3</sub>H<sub>a</sub>, C<sub>3'</sub>H<sub>a</sub>), 2.29 (s, 3H, N<sub>1</sub>CH<sub>3</sub>), 1.98 (dd, *J* = 5.1, 12.1 Hz, 1H, C<sub>3'</sub>H<sub>b</sub>), 1.90 (dd, *J* = 5.1, 11.5 Hz, 1H, C<sub>3</sub>H<sub>b</sub>).

<sup>13</sup>C NMR (125.8 MHz, DMSO-*d*<sub>6</sub>, 100 °C): δ 151.9 (2C, C<sub>7a</sub>, C<sub>7a'</sub>), 132.6 (C<sub>4a</sub>), 131.4 (C<sub>4a'</sub>), 126.8 (2C, C<sub>6</sub>, C<sub>6'</sub>), 123.2 (C<sub>4</sub>), 123.6 (C<sub>4'</sub>), 115.7 (2C, C<sub>5</sub>, C<sub>5'</sub>), 106.8 (C<sub>7</sub>), 106.3 (C<sub>7'</sub>), 82.6 (C<sub>8a</sub>), 79.2 (C<sub>8a'</sub>), 63.1 (C<sub>3a'</sub>), 62.3 (C<sub>3a</sub>), 51.2 (C<sub>2</sub>), 44.2 (C<sub>2'</sub>), 37.7 (C<sub>3'</sub>), 36.4 (C<sub>3</sub>), 35.0 (N<sub>1</sub>CH<sub>3</sub>).

#### Characterization in CDCl<sub>3</sub> at –40 °C<sup>25</sup>

<sup>1</sup>H NMR (500 MHz, CDCl<sub>3</sub>, –40 °C): *Major Rotamer*: δ 7.35–7.28 (m, 1H, C<sub>4'</sub>H), 7.09 (app-t, *J* = 7.6 Hz, 1H, C<sub>6'</sub>H), 6.91 (app-t, *J* = 6.9 Hz, 1H, C<sub>6</sub>H), 6.80 (app-t, *J* = 7.4 Hz, 1H, C<sub>5</sub>H), 6.51–6.43 (m, 2H, C<sub>7/7'</sub>H), 6.30 (app-t, *J* = 7.2 Hz, 1H, C<sub>5</sub>H), 5.71–5.63 (m, 1H, C<sub>4</sub>H), 5.30 (br-s, 1H, C<sub>8a</sub>H), 4.93 (br-s, 1H, N<sub>1</sub>H), 4.55 (br-s, 1H, N<sub>8</sub>H), 4.29 (br-s, 1H, C<sub>8a'</sub>H), 3.77 (br-s, 1H, N<sub>8</sub>H), 3.16–3.02 (m, 2H, C<sub>2</sub>H<sub>b</sub>, C<sub>2'</sub>H<sub>a</sub>), 2.60–2.45 (m, 2H, C<sub>3</sub>H<sub>a</sub>, C<sub>3'</sub>H<sub>b</sub>), 2.27 (s, 3H, N<sub>1</sub>CH<sub>3</sub>), 2.25–2.10 (m, 2H, C<sub>2</sub>H<sub>a</sub>, C<sub>2'</sub>H<sub>b</sub>), 2.10–2.03 (m, 2H, C<sub>3</sub>H<sub>a</sub>, C<sub>3'</sub>H<sub>b</sub>).

*Minor Rotamer*: δ 7.35–7.28 (m, 1H, C<sub>4</sub>H), 7.09 (app-t, *J* = 7.6 Hz, 1H, C<sub>6</sub>H), 6.91 (app-t, *J* = 6.9 Hz, 1H, C<sub>6</sub>H), 6.80 (app-t, *J* = 7.4 Hz, 1H, C<sub>5</sub>H), 6.51–6.43 (m, 2H, C<sub>7/7'</sub>H), 6.28 (app-t, *J* = 7.2 Hz, 1H, C<sub>5</sub>H), 5.71–5.63 (m, 1H, C<sub>4</sub>H), 5.30 (br-s, 1H, C<sub>8a</sub>H), 4.93 (br-s, 1H, N<sub>1</sub>H), 4.55 (br-s, 1H, N<sub>8</sub>H), 4.29 (br-s, 1H, C<sub>8a</sub>H), 3.77 (br-s, 1H, N<sub>8</sub>H), 3.16–3.02 (m, 2H, C<sub>2</sub>H<sub>b</sub>, C<sub>2'</sub>H<sub>a</sub>), 2.87–2.69 (m, 2H, C<sub>2</sub>H<sub>a</sub>, C<sub>2'</sub>H<sub>b</sub>), 2.60–2.45 (m, 2H, C<sub>3</sub>H<sub>a</sub>, C<sub>3'</sub>H<sub>b</sub>), 2.43 (s, 3H, N<sub>1</sub>CH<sub>3</sub>), 2.10–2.03 (m, 2H, C<sub>3</sub>H<sub>a</sub>, C<sub>3'</sub>H<sub>b</sub>).

<sup>13</sup>C NMR (125.8 MHz, CDCl<sub>3</sub>, –40 °C): *Major Rotamer*: δ 151.97 (C<sub>7a'</sub>), 150.87 (C<sub>7a</sub>), 132.95 (C<sub>4a'</sub>), 130.91 (C<sub>4a</sub>), 128.44 (C<sub>6</sub>), 128.11 (C<sub>6'</sub>), 124.80 (C<sub>4</sub>), 124.18 (C<sub>4'</sub>), 118.52 (C<sub>5'</sub>), 117.94 (C<sub>5</sub>), 109.21 (C<sub>7'</sub>), 108.08 (C<sub>7</sub>), 83.01 (C<sub>8a</sub>),

<sup>25</sup> <sup>1</sup>H and <sup>13</sup>C NMR were obtained in CDCl<sub>3</sub> at –40 °C for comparison to the data provided in the isolation report, see V. Jannic, F. Guéritte, O. Laprévote, L. Serani, M.-T. Martin, T. Sévenet, and P. Potier, *J. Nat. Prod.* 1999, **62**, 838. However, we found <sup>1</sup>H and <sup>13</sup>C NMR data collected at –40 °C difficult to analyze and less informative than data collected at 50 °C; see footnote 23.

Application of diazene-directed fragment assembly to the enantioselective total synthesis and stereochemical assignment of (+)-desmethyl-*meso*-chimonanthine and related heterodimeric alkaloids.

Stephen P. Lathrop and Mohammad Movassaghi\*

Page S69 / S153

79.74 (C<sub>8a'</sub>), 64.40 (C<sub>3a</sub>), 63.05 (C<sub>3a'</sub>), 52.09 (C<sub>2</sub>),  
45.62 (C<sub>2'</sub>), 39.13 (C<sub>3</sub>), 36.14 (C<sub>3'</sub>), 35.56 (N<sub>1</sub>CH<sub>3</sub>).

*Minor Rotamer:*  $\delta$  151.20 (C<sub>7a'</sub>), 151.07 (C<sub>7a</sub>),  
132.05 (C<sub>4a/4a'</sub>), 131.87 (C<sub>4a/4a'</sub>), 128.63 (C<sub>6'</sub>),  
127.98 (C<sub>6</sub>), 124.49 (C<sub>4</sub>), 124.36 (C<sub>4'</sub>), 118.89 (C<sub>5</sub>),  
117.77 (C<sub>5'</sub>), 109.21 (C<sub>7</sub>), 108.08 (C<sub>7'</sub>), 82.53 (C<sub>8a</sub>),  
79.88 (C<sub>8a'</sub>), 63.88 (C<sub>3a'</sub>), 63.62 (C<sub>3a</sub>), 51.89 (C<sub>2</sub>),  
45.14 (C<sub>2'</sub>), 38.12 (C<sub>3'</sub>), 37.03 (C<sub>3</sub>), 35.48 (N<sub>1</sub>CH<sub>3</sub>).

FTIR (thin film) cm<sup>-1</sup>: 3377 (br-m), 2931 (w), 1604 (m), 1485 (m), 1247 (w).

HRMS (ESI) (*m/z*): calc'd for C<sub>21</sub>H<sub>25</sub>N<sub>4</sub> [M+H]<sup>+</sup>: 333.2074,  
found: 333.2075.

[ $\alpha$ ]<sub>D</sub><sup>24</sup>: -1.8 (*c* = 0.21, EtOH).<sup>26</sup>  
-13.7 (*c* = 0.20, CH<sub>2</sub>Cl<sub>2</sub>).

TLC (10% methanol in chloroform saturated with ammonium hydroxide), R<sub>f</sub>: 0.26 (UV, CAM).

---

<sup>26</sup> Literature value: [ $\alpha$ ]<sub>D</sub><sup>24</sup> = +0.5 (*c* 1, EtOH), see V. Jannic, F. Guéritte, O. Laprévote, L. Serani, M.-T. Martin, T. Sévenet, and P. Potier, *J. Nat. Prod.* 1999, **62**, 838.

**Table S11. Comparison of our  $^1\text{H}$  NMR data for (–)-desmethyl-*meso*-chimonanthine (3) with literature data ( $\text{CDCl}_3$ ):**

| Assign-<br>ment    | Guéritte's Report <sup>26</sup><br>(+)-desmethyl- <i>meso</i> -<br>chimonanthine<br>$^1\text{H}$ NMR, 400 MHz<br>$\text{CDCl}_3$ , –40 °C<br>* denotes minor conformer | This Work<br>(–)-desmethyl- <i>meso</i> -<br>chimonanthine<br>$^1\text{H}$ NMR, 500 MHz<br>$\text{CDCl}_3$ , –40 °C<br>* denotes minor conformer | Dalko's Report <sup>27</sup><br>(±)-desmethyl- <i>meso</i> -<br>chimonanthine<br>$^1\text{H}$ NMR, 300 MHz<br>$\text{CDCl}_3$ | This Work<br>(–)-desmethyl- <i>meso</i> -<br>chimonanthine<br>$^1\text{H}$ NMR, 500 MHz<br>$\text{CDCl}_3$ , 50 °C |
|--------------------|------------------------------------------------------------------------------------------------------------------------------------------------------------------------|--------------------------------------------------------------------------------------------------------------------------------------------------|-------------------------------------------------------------------------------------------------------------------------------|--------------------------------------------------------------------------------------------------------------------|
| N1'-H              | 5.02 (s, 1H)<br>5.02 (s, 1H)*                                                                                                                                          | 4.93 (s, 1H)<br>4.93 (s, 1H)*                                                                                                                    | –                                                                                                                             | –                                                                                                                  |
| N1-CH <sub>3</sub> | 2.32 (s, 3H)<br>2.47 (s, 3H)*                                                                                                                                          | 2.27 (s, 3H)<br>2.43 (s, 3H)*                                                                                                                    | 2.30 (s, 3H)                                                                                                                  | 2.37 (s, 3H)                                                                                                       |
| C2'                | 3.18–2.73 (m, 2H)<br>3.18 (m, 2H)*                                                                                                                                     | 3.16–3.02 (m, 2H)<br>3.16–3.02 (m, 2H)*                                                                                                          | 3.02 (dd, $J$ = 6.6, 10.5 Hz, 1H)<br>2.66–2.63 (m, 1H)                                                                        | 3.07 (dd, $J$ = 6.7, 10.6 Hz, 1H)<br>2.72 (app-dt, $J$ = 5.1, 11.1 Hz, 1H)                                         |
| C2                 | 2.10 (m, 2H)<br>2.82–2.42 (m, 2H)*                                                                                                                                     | 2.25–2.10 (m, 2H)<br>2.87–2.69 (m, 2H)*                                                                                                          | 2.74–2.70 (m, 1H)<br>2.44–2.38 (m, 1H)                                                                                        | 2.78 (ddd, $J$ = 1.9, 6.6, 8.5 Hz, 1H)<br>2.52–2.39 (m, 2H)                                                        |
| C3'                | 2.60–2.40 (m, 2H)<br>2.10 (m)*                                                                                                                                         | 2.60–2.45 (m, 2H)<br>2.60–2.45 (m, 2H)*                                                                                                          | 2.30–2.20 (m, 2H)<br>2.10 (dd, $J$ = 5.1, 11.7 Hz, 1H)                                                                        | 2.31 (app-dt, $J$ = 6.9, 11.8 Hz, 1H)<br>2.15 (dd, $J$ = 5.1, 11.9 Hz, 1H)                                         |
| C3                 | 2.10 (m)<br>2.10 (m)*                                                                                                                                                  | 2.10–2.03 (m, 2H)<br>2.10–2.03 (m, 2H)*                                                                                                          | 2.30–2.20 (m, 2H)<br>2.01 (dd, $J$ = 1.8, 10.0 Hz, 1H)                                                                        | 2.52–2.39 (m, 2H)<br>2.10–2.04 (m, 1H)                                                                             |
| C3a                | –                                                                                                                                                                      | –                                                                                                                                                | –                                                                                                                             | –                                                                                                                  |
| C3a'               | –                                                                                                                                                                      | –                                                                                                                                                | –                                                                                                                             | –                                                                                                                  |
| C4'                | 7.28 (d, 1H)<br>5.62 (d, 1H)*                                                                                                                                          | 7.35–7.28 (m, 2H)<br>5.71–5.63 (m, 2H)*                                                                                                          | 6.60–6.42 (m, 3H)                                                                                                             | 6.64–6.50 (m, 4H)                                                                                                  |
| C4                 | 5.67 (d, 1H)<br>7.32 (d, 1H)*                                                                                                                                          | 5.71–5.63 (m, 2H)<br>7.35–7.28 (m, 2H)*                                                                                                          | 6.60–6.42 (m, 3H)                                                                                                             | 6.64–6.50 (m, 4H)                                                                                                  |
| C4a'               | –                                                                                                                                                                      | –                                                                                                                                                | –                                                                                                                             | –                                                                                                                  |
| C4a                | –                                                                                                                                                                      | –                                                                                                                                                | –                                                                                                                             | –                                                                                                                  |
| C5'                | 6.80 (t, 1H)<br>6.28 (t, 1H)*                                                                                                                                          | 6.80 (app-t, $J$ = 7.4 Hz, 1H)<br>6.28 (app-t, $J$ = 7.2 Hz, 1H)*                                                                                | –                                                                                                                             | –                                                                                                                  |
| C5                 | 6.30 (t, 1H)<br>6.82 (t, 1H)*                                                                                                                                          | 6.30 (app-t, $J$ = 7.2 Hz, 1H)<br>6.80 (app-t, $J$ = 7.4 Hz, 1H)*                                                                                | –                                                                                                                             | –                                                                                                                  |
| C5/5'              | –                                                                                                                                                                      | –                                                                                                                                                | 6.60–6.42 (m, 3H)<br>6.98–6.88 (m, 3H)                                                                                        | 6.64–6.50 (m, 4H)                                                                                                  |
| C6'                | 7.10 (t, 1H)<br>6.91 (t, 1H)*                                                                                                                                          | 7.09 (app-t, $J$ = 7.6 Hz, 1H)<br>6.91 (app-t, $J$ = 6.9 Hz, 1H)*                                                                                | 6.98–6.88 (m, 3H)                                                                                                             | 7.04–6.91 (m, 2H)                                                                                                  |
| C6                 | 6.91 (t, 1H)<br>7.10 (t, 1H)*                                                                                                                                          | 6.91 (app-t, $J$ = 6.9 Hz, 1H)<br>7.09 (app-t, $J$ = 7.6 Hz, 1H)*                                                                                | 6.98–6.88 (m, 3H)                                                                                                             | 7.04–6.91 (m, 2H)                                                                                                  |
| C7'                | 6.46 (d, 1H)<br>6.49 (d, 1H)*                                                                                                                                          | 6.51–6.43 (m, 1H)<br>6.51–6.43 (m, 1H)*                                                                                                          | 6.41 (d, $J$ = 7.9 Hz, 1H)                                                                                                    | 6.46 (app t, $J$ = 7.1 Hz, 2H)                                                                                     |

<sup>27</sup> C. Menozzi, P. I. Dalko, and J. Cossy, *Chem. Commun.* 2006, 4638.

Application of diazene-directed fragment assembly to the enantioselective total synthesis and stereochemical assignment of (+)-desmethyl-*meso*-chimonanthine and related heterodimeric alkaloids.

Stephen P. Lathrop and Mohammad Movassaghi\*

Page S71 / S153

|       |                               |                                         |                            |                                |
|-------|-------------------------------|-----------------------------------------|----------------------------|--------------------------------|
| C7    | 6.48 (d, 1H)<br>6.48 (d, 1H)* | 6.51–6.43 (m, 1H)<br>6.51–6.43 (m, 1H)* | 6.40 (d, $J = 7.7$ Hz, 1H) | 6.46 (app t, $J = 7.1$ Hz, 2H) |
| C7a'  | –                             | –                                       | –                          | –                              |
| C7a   | –                             | –                                       | –                          | –                              |
| N8'-H | 3.80 (s, 1H)<br>4.62 (s, 1H)* | 3.77 (s, 1H)<br>4.55 (s, 1H)*           | –                          | –                              |
| N8-H  | 4.64 (s, 1H)<br>3.80 (s, 1H)* | 4.55 (s, 1H)<br>3.77 (s, 1H)*           | –                          | –                              |
| C8a'  | 4.32 (s, 1H)<br>5.42 (s, 1H)  | 4.29 (s, 1H)<br>5.30 (s, 1H)*           | 4.97 (s, 1H)               | 5.02 (br-s, 1H)                |
| C8a   | 5.42 (s, 1H)<br>4.32 (s, 1H)* | 5.30 (s, 1H)<br>4.29 (s, 1H)*           | 4.46 (s, 1H)               | 4.57 (br-s, 1H)                |

**Table S12. Comparison of <sup>13</sup>C NMR data of (–)-desmethyl-*meso*-chimonanthine (3) with literature data (CDCl<sub>3</sub>):**

| Assign-<br>ment    | Guéritte's Report <sup>26</sup><br>(–)-desmethyl- <i>meso</i> -<br>chimonanthine<br><sup>13</sup> C NMR, 100 MHz<br>CDCl <sub>3</sub> , – 40 °C<br>*denotes minor<br>conformer | This Work<br>(–)-desmethyl- <i>meso</i> -<br>chimonanthine<br><sup>13</sup> C NMR, 125 MHz<br>CDCl <sub>3</sub> , –40 °C<br>*denotes minor<br>conformer | Chemical Shift<br>Difference<br>Δδ = δ (this work)<br>– δ (ref 26) | Dalko's Report <sup>27</sup><br>(±)-desmethyl-<br><i>meso</i> -chimonanthine<br><sup>13</sup> C NMR, 300 MHz<br>CDCl <sub>3</sub> | This Work<br>(–)-desmethyl- <i>meso</i> -<br>chimonanthine<br><sup>13</sup> C NMR, 125 MHz<br>CDCl <sub>3</sub> , 50 °C | Chemical Shift<br>Difference<br>Δδ = δ (this work)<br>– δ (ref 27) |
|--------------------|--------------------------------------------------------------------------------------------------------------------------------------------------------------------------------|---------------------------------------------------------------------------------------------------------------------------------------------------------|--------------------------------------------------------------------|-----------------------------------------------------------------------------------------------------------------------------------|-------------------------------------------------------------------------------------------------------------------------|--------------------------------------------------------------------|
| N1'-H              | –                                                                                                                                                                              | –                                                                                                                                                       | –                                                                  | –                                                                                                                                 | –                                                                                                                       | –                                                                  |
| N1-CH <sub>3</sub> | 35.12<br>35.12*                                                                                                                                                                | 35.56<br>35.48*                                                                                                                                         | 0.44<br>0.36*                                                      | 35.7                                                                                                                              | 35.9                                                                                                                    | 0.2                                                                |
| C2'                | 44.87<br>44.57*                                                                                                                                                                | 45.62<br>45.14*                                                                                                                                         | 0.75<br>0.57*                                                      | 45.6                                                                                                                              | 45.8                                                                                                                    | 0.2                                                                |
| C2                 | 51.85<br>51.66*                                                                                                                                                                | 52.09<br>51.89*                                                                                                                                         | 0.24<br>0.23*                                                      | 52.2                                                                                                                              | 52.5                                                                                                                    | 0.3                                                                |
| C3'                | 35.73<br>37.59*                                                                                                                                                                | 36.14<br>38.12*                                                                                                                                         | 0.41<br>0.53*                                                      | 38.0                                                                                                                              | 38.7                                                                                                                    | 0.7                                                                |
| C3                 | 38.06<br>36.37*                                                                                                                                                                | 39.13<br>37.03*                                                                                                                                         | 1.07<br>0.66*                                                      | 36.5                                                                                                                              | 37.1                                                                                                                    | 0.6                                                                |
| C3a'               | 62.85<br>63.63*                                                                                                                                                                | 63.05<br>63.88*                                                                                                                                         | 0.2<br>0.25*                                                       | 64.4                                                                                                                              | 64.7                                                                                                                    | 0.3                                                                |
| C3a                | 63.95<br>63.30*                                                                                                                                                                | 64.40<br>63.62*                                                                                                                                         | 0.45<br>0.32*                                                      | 63.6                                                                                                                              | 64.0                                                                                                                    | 0.4                                                                |
| C4'                | 123.91<br>124.25*                                                                                                                                                              | 124.18<br>124.36*                                                                                                                                       | 0.27<br>0.11*                                                      | –                                                                                                                                 | –                                                                                                                       | –                                                                  |
| C4                 | 124.43<br>124.06*                                                                                                                                                              | 124.80<br>124.49*                                                                                                                                       | 0.37<br>0.43*                                                      | –                                                                                                                                 | –                                                                                                                       | –                                                                  |
| C4/4'              | –                                                                                                                                                                              | –                                                                                                                                                       | –                                                                  | 124.7, 124.3                                                                                                                      | 124.9, 124.6                                                                                                            | –0.1–0.6                                                           |
| C4a'               | 132.22<br>131.31*                                                                                                                                                              | 132.95<br>131.87*                                                                                                                                       | 0.73<br>0.56                                                       | 131.4                                                                                                                             | 132.2                                                                                                                   | 0.8                                                                |
| C4a                | 130.04<br>131.31*                                                                                                                                                              | 130.91<br>131.87*                                                                                                                                       | 0.87<br>0.56                                                       | 131.5                                                                                                                             | 133.4                                                                                                                   | 1.9                                                                |
| C5'                | 118.45<br>117.73*                                                                                                                                                              | 118.52<br>117.77*                                                                                                                                       | 0.07<br>0.04                                                       | –                                                                                                                                 | –                                                                                                                       | –                                                                  |
| C5                 | 117.97<br>118.83*                                                                                                                                                              | 117.94<br>118.89*                                                                                                                                       | –0.03<br>0.06                                                      | –                                                                                                                                 | –                                                                                                                       | –                                                                  |
| C5/5'              | –                                                                                                                                                                              | –                                                                                                                                                       | –                                                                  | 118.8, 118.3                                                                                                                      | 118.7, 118.7                                                                                                            | –0.1–0.4                                                           |
| C6'                | 128.19<br>128.65*                                                                                                                                                              | 128.11<br>128.63*                                                                                                                                       | –0.08<br>–0.02                                                     | 128.1                                                                                                                             | 128.4                                                                                                                   | 0.3                                                                |
| C6                 | 128.43<br>127.95*                                                                                                                                                              | 128.44<br>127.98*                                                                                                                                       | 0.01<br>0.03                                                       | 128.1                                                                                                                             | 128.4                                                                                                                   | 0.3                                                                |
| C7'                | 109.10<br>108.19*                                                                                                                                                              | 109.21<br>108.08*                                                                                                                                       | 0.11<br>0.11                                                       | –                                                                                                                                 | –                                                                                                                       | –                                                                  |
| C7                 | 108.19<br>109.10*                                                                                                                                                              | 108.08<br>109.21*                                                                                                                                       | –0.11<br>–0.11                                                     | –                                                                                                                                 | –                                                                                                                       | –                                                                  |
| C7/C7'             | –                                                                                                                                                                              | –                                                                                                                                                       | –                                                                  | 108.8, 108.4                                                                                                                      | 109.1, 108.8                                                                                                            | 0–0.7                                                              |
| C7a'               | 151.75<br>151.04*                                                                                                                                                              | 151.97<br>151.20*                                                                                                                                       | 0.22<br>0.16                                                       | 151.6                                                                                                                             | 152.0                                                                                                                   | 0.4                                                                |
| C7a                | 150.30<br>151.51*                                                                                                                                                              | 150.87<br>152.01*                                                                                                                                       | 0.57<br>0.5                                                        | 151.6                                                                                                                             | 152.0                                                                                                                   | 0.4                                                                |
| N8'-H              | –                                                                                                                                                                              | –                                                                                                                                                       | –                                                                  | –                                                                                                                                 | –                                                                                                                       | –                                                                  |
| N8-H               | –                                                                                                                                                                              | –                                                                                                                                                       | –                                                                  | –                                                                                                                                 | –                                                                                                                       | –                                                                  |
| C8a'               | 79.30<br>82.36*                                                                                                                                                                | 79.74<br>79.88*                                                                                                                                         | 0.44<br>–2.48                                                      | 80.1                                                                                                                              | 80.4                                                                                                                    | 0.3                                                                |
| C8a                | 82.36<br>82.36*                                                                                                                                                                | 83.01<br>82.53*                                                                                                                                         | 0.65<br>0.17                                                       | 83.4                                                                                                                              | 83.9                                                                                                                    | 0.5                                                                |



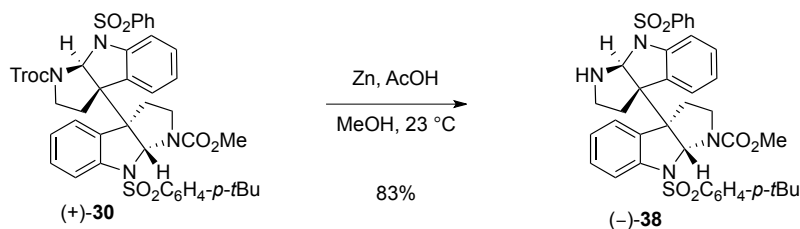

### N1'-H Heterodimer (–)-38:

Activated zinc dust (106 mg, 1.62 mmol, 20.0 equiv) and acetic acid (185  $\mu\text{L}$ , 3.24 mmol, 40 equiv) were added sequentially to a solution of heterodimer (+)-30 (72 mg, 81.1  $\mu\text{mol}$ , 1 equiv) in methanol (7.0 mL) at 23  $^\circ\text{C}$ . After 1.5 h, an aqueous solution of sodium hydroxide (1 N, 10 mL) was added and the resulting suspension was extracted with dichloromethane (3  $\times$  20 mL). The combined organic extracts were washed with brine (10 mL), were dried over anhydrous sodium sulfate, were filtered, and were concentrated under reduced pressure. The resulting residue was purified by flash column chromatography on silica gel (eluent: 30 $\rightarrow$ 50% ethyl acetate in hexanes) to afford the N1'-H heterodimer (–)-38 (48.0 mg, 83.1%) as a white foam.

As a result of the slow conformational equilibration at ambient temperature, NMR spectra were collected at elevated temperature. Structural assignments were made using additional information from gCOSY, HSQC, and HMBC experiments also collected at elevated temperature.

$^1\text{H}$  NMR (500 MHz,  $\text{DMSO}-d_6$ , 80 $^\circ\text{C}$ ):  $\delta$  7.89 (d,  $J$  = 7.1 Hz, 2H,  $\text{N}_8\text{SO}_2\text{Ar}-o\text{-H}$ ), 7.68 (d,  $J$  = 8.3 Hz, 2H,  $\text{N}_8\text{SO}_2\text{Ar}-m\text{-H}$ ), 7.51 (t,  $J$  = 7.2 Hz, 1H,  $\text{N}_8\text{SO}_2\text{Ph}-p\text{-H}$ ), 7.35–7.10 (m, 9H,  $\text{N}_8\text{SO}_2\text{Ph}-m\text{-H}$ ,  $\text{N}_8\text{SO}_2\text{Ph}-o\text{-H}$ ,  $\text{C}_7\text{H}$ ,  $\text{C}_7'\text{H}$ ,  $\text{C}_6'\text{H}$ ,  $\text{C}_4'\text{H}$ ), 7.02 (app-t,  $J$  = 6.9 Hz, 1H,  $\text{C}_6\text{H}$ ), 6.95 (br-s, 1H,  $\text{C}_5'\text{H}$ ), 6.54 (br-s, 1H,  $\text{C}_{8a}\text{H}$ ), 6.37 (br-s, 1H,  $\text{C}_5\text{H}$ ), 6.01 (br-s, 1H,  $\text{C}_4\text{H}$ ), 4.85 (br-s, 1H,  $\text{C}_{8a}'\text{H}$ ), 3.92 (dd,  $J$  = 7.5, 11.4 Hz, 1H,  $\text{C}_2\text{H}_a$ ), 3.66 (s, 3H,  $\text{N}_1\text{CO}_2\text{CH}_3$ ), 3.16 (s, 1H,  $\text{N}_1'\text{H}$ ), 3.11–3.03 (m, 1H,  $\text{C}_2'\text{H}_a$ ), 2.70 (app-dt,  $J$  = 5.0, 11.8 Hz, 1H,  $\text{C}_2\text{H}_b$ ), 2.61 (br-s, 1H,  $\text{C}_2'\text{H}_b$ ), 2.43–2.31 (m, 1H,  $\text{C}_3\text{H}_a$ ), 2.11–1.85 (m, 3H,  $\text{C}_3\text{H}_b$ ,  $\text{C}_3'\text{H}_a$ ,  $\text{C}_3'\text{H}_b$ ), 1.29 (s, 9H,  $\text{C}(\text{CH}_3)_3$ ).

$^{13}\text{C}$  NMR (125.8 MHz,  $\text{DMSO}-d_6$ , 80  $^\circ\text{C}$ ):  $\delta$  156.4 ( $\text{N}_8'\text{SO}_2\text{Ar}-p\text{-C}$ ), 153.2 ( $\text{N}_1\text{CO}_2\text{CH}_3$ ), 141.7 ( $\text{N}_8'\text{SO}_2\text{Ph}-ipso\text{-C}$ ), 141.1 ( $\text{C}_{7a}$ ), 138.0 ( $\text{C}_{7a}'$ ), 136.1 ( $\text{N}_8\text{SO}_2\text{Ar}-ipso\text{-C}$ ), 132.4 ( $\text{N}_8'\text{SO}_2\text{Ph}-p\text{-C}$ ), 131.7 ( $\text{C}_{4a}'$ ), 130.6 ( $\text{C}_{4a}$ ), 128.9 ( $\text{C}_6$ ), 128.7 ( $\text{N}_8'\text{SO}_2\text{Ph}-m\text{-C}$ ), 128.5 ( $\text{C}_{6'}$ ), 126.2 ( $\text{N}_8\text{SO}_2\text{Ar}-o\text{-C}$ ), 126.0 ( $\text{N}_8\text{SO}_2\text{Ar}-m\text{-C}$ ), 125.8 ( $\text{N}_8'\text{SO}_2\text{Ph}-o\text{-C}$ ), 124.5 ( $\text{C}_{4'}$ ), 123.8 ( $\text{C}_4$ ), 122.8 ( $\text{C}_5$ ), 122.5 ( $\text{C}_{5'}$ ), 112.2 ( $\text{C}_7$ ), 111.2 ( $\text{C}_{7'}$ ), 84.2 ( $\text{C}_{8a}'$ ), 80.0 ( $\text{C}_{8a}$ ), 62.0 ( $\text{C}_{3a}$ ), 60.8 ( $\text{C}_{3a}'$ ), 52.0 ( $\text{N}_1\text{CO}_2\text{CH}_3$ ), 44.2 ( $\text{C}_2$ ), 43.2 ( $\text{C}_{2'}$ ),

Application of diazene-directed fragment assembly to the enantioselective total synthesis and stereochemical assignment of (+)-desmethyl-*meso*-chimonanthine and related heterodimeric alkaloids.  
Stephen P. Lathrop and Mohammad Movassaghi\*

Page S74 / S153

37.2 (C<sub>3'</sub>), 37.0 (C<sub>3</sub>), 34.5 (C(CH<sub>3</sub>)<sub>3</sub>), 30.2 (C(CH<sub>3</sub>)<sub>3</sub>).

FTIR (thin film) cm<sup>-1</sup>: 2956 (m), 1713 (s), 1595 (m), 1477 (m), 1447 (m).

HRMS (ESI) (*m/z*): calc'd for C<sub>38</sub>H<sub>41</sub>N<sub>4</sub>O<sub>6</sub>S<sub>2</sub> [M+H]<sup>+</sup>: 713.2462, found: 713.2470.

[α]<sub>D</sub><sup>24</sup>: -13 (*c* = 0.65 CH<sub>2</sub>Cl<sub>2</sub>).

TLC (33% ethyl acetate in hexanes), R<sub>f</sub>: 0.13 (UV, CAM).

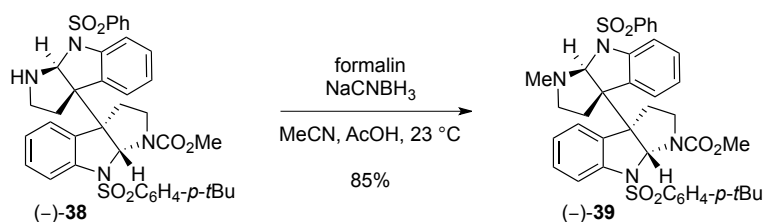

### N1'-Methyl Heterodimer (-)-39:

Formalin (37% wt, 1.28 mL, 16.8 mmol, 235 equiv) and sodium cyanoborohydride in tetrahydrofuran (1.0 M, 219  $\mu\text{L}$ , 219  $\mu\text{mol}$ , 3.00 equiv) were added sequentially via syringe to a solution of N1'-H heterodimer (-)-38 (52.0 mg, 74.4  $\mu\text{mol}$ , 1 equiv) in acetonitrile–acetic acid (10:1, 7.70 mL) at 23  $^\circ\text{C}$ . After 30 min, another portion of sodium cyanoborohydride (1.0 M in tetrahydrofuran, 146  $\mu\text{L}$ , 146  $\mu\text{mol}$ , 2.00 equiv) was added via syringe. After an additional 30 min, saturated aqueous sodium bicarbonate solution (10 mL) was added and the resulting mixture was extracted with dichloromethane (3  $\times$  20 mL). The combined organic extracts were washed with brine (15 mL), were dried over anhydrous sodium sulfate, were filtered and were concentrated under reduced pressure. The resulting residue was purified by flash column chromatography on silica gel (eluent: 25 $\rightarrow$ 50% ethyl acetate in hexanes) to afford the N1'-methyl heterodimer (-)-39 (45.0 mg, 84.9%) as a white foam.

As a result of the slow conformational equilibration at ambient temperature, NMR spectra were collected at elevated temperature. Structural assignments were made using additional information from gCOSY, HSQC, and HMBC experiments also collected at elevated temperature.

$^1\text{H}$  NMR (500 MHz,  $\text{CD}_3\text{CN}$ , 70  $^\circ\text{C}$ ):

$\delta$  7.88 (d,  $J$  = 8.7 Hz, 2H,  $\text{N}_8\text{SO}_2\text{Ar-}o\text{-H}$ ), 7.64 (d,  $J$  = 8.3 Hz, 2H,  $\text{N}_8\text{SO}_2\text{Ar-}m\text{-H}$ ), 7.56–7.47 (m, 3H,  $\text{N}_8\text{SO}_2\text{Ph-}p\text{-H}$ ,  $\text{N}_8\text{SO}_2\text{Ph-}o\text{-H}$ ), 7.45 (d,  $J$  = 8.0 Hz, 1H,  $\text{C}_7\text{H}$ ), 7.38–7.32 (m, 2H,  $\text{N}_8\text{SO}_2\text{Ph-}m\text{-H}$ ), 7.29–7.15 (m, 4H,  $\text{C}_6\text{H}$ ,  $\text{C}_6'\text{H}$ ,  $\text{C}_4'\text{H}$ ,  $\text{C}_7'\text{H}$ ), 7.02 (app-t,  $J$  = 7.4 Hz, 1H,  $\text{C}_5'\text{H}$ ), 6.59 (br-s, 1H,  $\text{C}_5\text{H}$ ), 6.52 (s, 1H,  $\text{C}_{8a}\text{H}$ ), 6.33 (br-s, 1H,  $\text{C}_4\text{H}$ ), 5.20 (s, 1H,  $\text{C}_{8a}'\text{H}$ ), 3.81 (dd,  $J$  = 7.7, 11.2 Hz, 1H,  $\text{C}_2\text{H}_a$ ), 3.59 (s, 3H,  $\text{N}_1\text{CO}_2\text{CH}_3$ ), 2.77–2.71 (m, 1H,  $\text{C}_2'\text{H}_a$ ), 2.68 (app-dt,  $J$  = 5.3, 11.8 Hz, 1H,  $\text{C}_2\text{H}_b$ ), 2.56 (s, 3H,  $\text{N}_1'\text{CH}_3$ ), 2.40 (app-dt,  $J$  = 5.0, 10.2 Hz, 1H,  $\text{C}_2'\text{H}_b$ ), 2.21–2.08 (m, 1H,  $\text{C}_3\text{H}_a$ ), 1.98–1.84 (m, 3H,  $\text{C}_3\text{H}_b$ ,  $\text{C}_3'\text{H}_a$ ,  $\text{C}_3'\text{H}_b$ ), 1.33 (s, 9H,  $\text{C}(\text{CH}_3)_3$ ).

$^{13}\text{C}$  NMR (125.8 MHz,  $\text{CD}_3\text{CN}$ , 70  $^\circ\text{C}$ ):

$\delta$  159.1 ( $\text{N}_8\text{SO}_2\text{Ar-}p\text{-C}$ ), 156.0 ( $\text{N}_1\text{CO}_2\text{CH}_3$ ), 144.6 (2C  $\text{C}_{7a}$ ,  $\text{C}_{7a}'$ ), 141.3 ( $\text{N}_8\text{SO}_2\text{Ph-}ipso\text{-C}$ ), 139.7 ( $\text{N}_8\text{SO}_2\text{Ar-}ipso\text{-C}$ ), 135.2 ( $\text{C}_{4a}'$ ), 134.6 ( $\text{N}_8\text{SO}_2\text{Ph-}p\text{-C}$ ), 133.3 ( $\text{C}_{4a}$ ), 131.2 ( $\text{C}_6$ ), 131.0 ( $\text{N}_8\text{SO}_2\text{Ph-}m\text{-C}$ ), 130.6 ( $\text{C}_6'$ ), 129.1 ( $\text{N}_8\text{SO}_2\text{Ph-}o\text{-C}$ ), 128.3 ( $\text{N}_8\text{SO}_2\text{Ar-}o\text{-C}$ ,  $\text{N}_8\text{SO}_2\text{Ar-}m\text{-C}$ ), 126.7 (2C,  $\text{C}_4$ ,  $\text{C}_4'$ ), 125.6 ( $\text{C}_5$ ), 125.3 ( $\text{C}_5'$ ), 115.8 ( $\text{C}_7$ ), 115.5 ( $\text{C}_7'$ ), 91.2

Application of diazene-directed fragment assembly to the enantioselective total synthesis and stereochemical assignment of (+)-desmethyl-*meso*-chimonanthine and related heterodimeric alkaloids.

Stephen P. Lathrop and Mohammad Movassaghi\*

Page S76 / S153

(C<sub>8a'</sub>), 82.7 (C<sub>8a</sub>), 64.7 (C<sub>3a'</sub>), 64.3 (C<sub>3a</sub>), 54.0 (N<sub>1</sub>CO<sub>2</sub>CH<sub>3</sub>), 53.3 (C<sub>2'</sub>), 46.7 (C<sub>2</sub>), 39.3 (C<sub>3</sub>), 39.0 (C<sub>3'</sub>), 38.8 (N<sub>1'</sub>CH<sub>3</sub>), 36.7 (C(CH<sub>3</sub>)<sub>3</sub>), 32.1 (C(CH<sub>3</sub>)<sub>3</sub>).

FTIR (thin film) cm<sup>-1</sup>: 2956 (m), 1713 (s), 1595 (m), 1477 (m), 1447 (m).

HRMS (ESI) (*m/z*): calc'd for C<sub>39</sub>H<sub>43</sub>N<sub>4</sub>O<sub>6</sub>S<sub>2</sub> [M+H]<sup>+</sup>: 727.2619, found: 727.2627.

[α]<sub>D</sub><sup>24</sup>: -15 (*c* = 0.96, CH<sub>2</sub>Cl<sub>2</sub>).

TLC (50% ethyl acetate in hexanes), R<sub>f</sub>: 0.55 (UV, CAM).

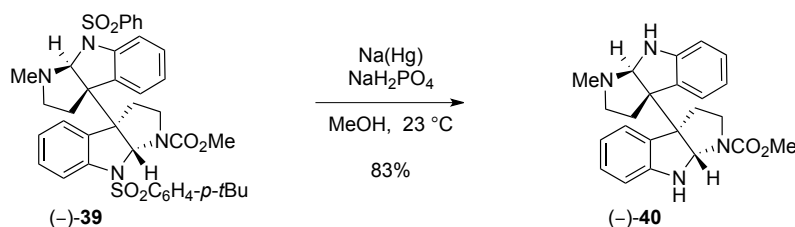

**(-)-N1-Carboxymethyl-*meso*-Chimonanthine (40):**

Sodium amalgam (5%-Na, 443 mg, 963  $\mu\text{mol}$ , 20.0 equiv)<sup>8</sup> was added to a suspension of sodium phosphate monobasic monohydrate (146 mg, 1.06 mmol, 22.0 equiv) and N1'-methyl heterodimer (-)-**39** (35.0 mg, 49.1  $\mu\text{mol}$ , 1 equiv) in methanol at 23  $^\circ\text{C}$ . After 1 h, another portion of sodium phosphate monobasic monohydrate (146 mg, 1.06 mmol, 22.0 equiv) and sodium amalgam (5%-Na, 443 mg, 963  $\mu\text{mol}$ , 20.0 equiv) were added sequentially. After an additional 1 h, sodium phosphate monobasic monohydrate (146 mg, 1.06 mmol, 22.0 equiv) and sodium amalgam (5%-Na, 443 mg, 0.963 mmol, 20.0 equiv) were added. After 1 h, the reaction mixture was diluted with ethyl acetate (20 mL) and was washed with 5% aqueous sodium bicarbonate solution (10 mL). The aqueous layer was separated and extracted with ethyl acetate (2  $\times$  20 mL). The combined organic layers were washed with brine (10 mL), were dried over anhydrous sodium sulfate, were filtered, and were concentrated under reduced pressure. The resulting residue was purified by flash column chromatography on silica gel (eluent: gradient, 5% methanol  $\rightarrow$  9% methanol, 1.0% ammonium hydroxide in chloroform) to afford the heterodimer (-)-N1-carboxymethyl-*meso*-chimonanthine (**40**, 15.5 mg, 82.6%) as a white solid.

As a result of the slow conformational equilibration at ambient temperature, NMR spectra were collected at elevated temperature. Structural assignments were made using additional information from gCOSY, HSQC, and HMBC experiments also collected at elevated temperature.

<sup>1</sup>H NMR (500 MHz, CD<sub>3</sub>CN, 75  $^\circ\text{C}$ ):

$\delta$  7.02 (app-t,  $J$  = 7.5 Hz, 1H, C<sub>6</sub>H), 6.98 (app-t,  $J$  = 7.5 Hz, 1H, C<sub>6</sub>H), 6.70–6.58 (m, 2H, C<sub>4</sub>H, C<sub>4</sub>H), 6.57–6.47 (m, 3H, C<sub>5</sub>H, C<sub>5</sub>H, C<sub>7</sub>H), 6.45 (d,  $J$  = 8.0 Hz, 1H, C<sub>7</sub>H), 5.35 (br-s, 1H, C<sub>8a</sub>H), 5.03 (br-s, 1H, N<sub>8</sub>H), 4.56 (s, 2H, C<sub>8a</sub>H, N<sub>8</sub>H), 3.73–3.65 (m, 4H, C<sub>2</sub>H<sub>a</sub>, N<sub>1</sub>CO<sub>2</sub>CH<sub>3</sub>), 2.91 (app-dt,  $J$  = 6.4, 10.9 Hz, 1H, C<sub>2</sub>H<sub>b</sub>), 2.76–2.67 (m, 1H, C<sub>2</sub>H<sub>a</sub>), 2.52 (app-dt,  $J$  = 8.5, 11.8 Hz, 1H, C<sub>3</sub>H<sub>a</sub>), 2.43–2.36 (m, 2H, C<sub>2</sub>H<sub>b</sub>, C<sub>3</sub>H<sub>a</sub>), 2.34 (s, 3H, N<sub>1</sub>CH<sub>3</sub>), 2.28 (dd,  $J$  = 6.3, 12.3 Hz, 1H, C<sub>3</sub>H<sub>b</sub>), 2.03–1.96 (m, 1H, C<sub>3</sub>H<sub>b</sub>).

<sup>13</sup>C NMR (125.8 MHz, CD<sub>3</sub>CN, 75  $^\circ\text{C}$ ):

$\delta$  156.7 (N<sub>1</sub>CO<sub>2</sub>CH<sub>3</sub>), 154.2 (C<sub>7a</sub>'), 152.8 (C<sub>7a</sub>), 134.2 (C<sub>4a</sub>'), 132.4 (C<sub>4a</sub>'), 130.3 (C<sub>6</sub>), 129.8 (C<sub>6</sub>'), 126.2 (2C, C<sub>4</sub>, C<sub>4</sub>'), 119.8 (C<sub>5</sub>), 119.3 (C<sub>5</sub>'), 110.4 (C<sub>7</sub>), 110.1 (C<sub>7</sub>'), 85.3 (C<sub>8a</sub>'), 79.7 (C<sub>8a</sub>), 65.1 (2C, C<sub>3a</sub>, C<sub>3a</sub>'), 53.9 (C<sub>2</sub>'), 53.5 (N<sub>1</sub>CO<sub>2</sub>CH<sub>3</sub>), 46.8 (C<sub>2</sub>), 38.6 (C<sub>3</sub>'), 36.9 (C<sub>3</sub>), 36.2 (N<sub>1</sub>CH<sub>3</sub>).

Application of diazene-directed fragment assembly to the enantioselective total synthesis and stereochemical assignment of (+)-desmethyl-*meso*-chimonanthine and related heterodimeric alkaloids.  
Stephen P. Lathrop and Mohammad Movassaghi\*

Page S78 / S153

FTIR (thin film)  $\text{cm}^{-1}$ : 3372 (br-m), 2955 (m), 1696 (s), 1606 (m), 1451 (s), 1386 (s).

HRMS (ESI) ( $m/z$ ): calc'd for  $\text{C}_{23}\text{H}_{27}\text{N}_4\text{O}_2$   $[\text{M}+\text{H}]^+$ : 391.2129, found: 391.2132.

$[\alpha]_{\text{D}}^{24}$ :  $-202$  ( $c = 0.95$ ,  $\text{CH}_2\text{Cl}_2$ ).

TLC (9% methanol, 1% ammonium hydroxide in chloroform),  $R_f$ : 0.40 (UV, CAM).

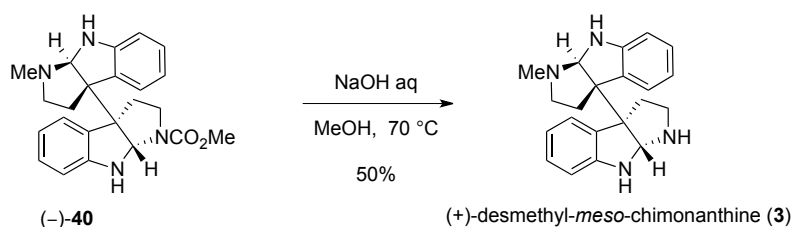

### **(+)-Desmethyl-*meso*-Chimonanthine (**3**):**

An aqueous solution of sodium hydroxide (5 N, 1.5 mL) was added to solution of (–)-N1-carboxymethyl-*meso*-chimonanthine (**40**, 18.0 mg, 46.1  $\mu\text{mol}$ , 1 equiv) in methanol (3 mL) in a sealed tube at 23  $^{\circ}\text{C}$ . The reaction vessel was sealed and heated to 70  $^{\circ}\text{C}$ . After 26 h, the brown mixture was allowed to cool to 23  $^{\circ}\text{C}$  and was extracted with dichloromethane ( $2 \times 20\text{ mL}$ ). The combined organic extracts were washed with brine (10 mL), were dried over anhydrous sodium sulfate, were filtered, and were concentrated under reduced pressure. The resulting residue was purified by flash column chromatography on silica gel (eluent: 4.5% methanol, 0.5% ammonium hydroxide  $\rightarrow$  18% methanol, 2.0% ammonium hydroxide in chloroform) to afford the (+)-desmethyl-*meso*-chimonanthine (**3**, 7.7 mg, 50.4%) as a white solid.

The corresponding enantiomer, (–)-desmethyl-*meso*-chimonanthine (**3**, 16 mg, 91%) was obtained by Red-Al reduction of (–)-N1-carboxymethyl desmethyl-*meso*-chimonanthine (**37**). For full characterization of compound **3**, see pages S67–S72.

$[\alpha]_{\text{D}}^{24}$ : +2.7 ( $c = 0.13$ , EtOH).<sup>26</sup>  
+13.7 ( $c = 0.13$ ,  $\text{CH}_2\text{Cl}_2$ ).

| SAMPLE      |          | DEC. & VT  |         |
|-------------|----------|------------|---------|
| solvent     | Benzene  | dfrq       | 125.672 |
|             |          | dn         | C13     |
|             |          | dpwr       | 30      |
|             |          | dof        | 0       |
|             |          | dm         | nnn     |
|             |          | dmm        | w       |
|             |          | dmf        | 10000   |
| ACQUISITION |          | PROCESSING |         |
| sfrq        | 499.746  | dseq       | 1.0     |
| tn          | H1       | dres       | 1.0     |
| at          | 3.001    | homo       | n       |
| np          | 63050    | wtfile     |         |
| sw          | 10504.2  | proc       | ft      |
| fb          | not used | fn         | 262144  |
| bs          | 4        | math       | f       |
| tpwr        | 56       |            |         |
| pw          | 8.6      | werr       |         |
| d1          | 2.000    | wexp       |         |
| tof         | 1519.5   | wbs        |         |
| nt          | 16       | wnt        | wft     |
| ct          | 16       |            |         |
| alock       | n        |            |         |
| gain        | not used |            |         |
| FLAGS       |          |            |         |
| il          | n        |            |         |
| in          | n        |            |         |
| dp          | y        |            |         |
| hs          | nn       |            |         |
| DISPLAY     |          |            |         |
| sp          | -11.0    |            |         |
| wp          | 6003.5   |            |         |
| vs          | 25       |            |         |
| sc          | 0        |            |         |
| wc          | 250      |            |         |
| hzmm        | 24.01    |            |         |
| is          | 143.89   |            |         |
| rfl         | 4784.7   |            |         |
| rfp         | 3578.2   |            |         |
| th          | 7        |            |         |
| ins         | 100.000  |            |         |
| ai          | ph       |            |         |

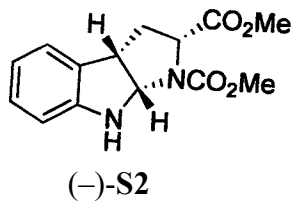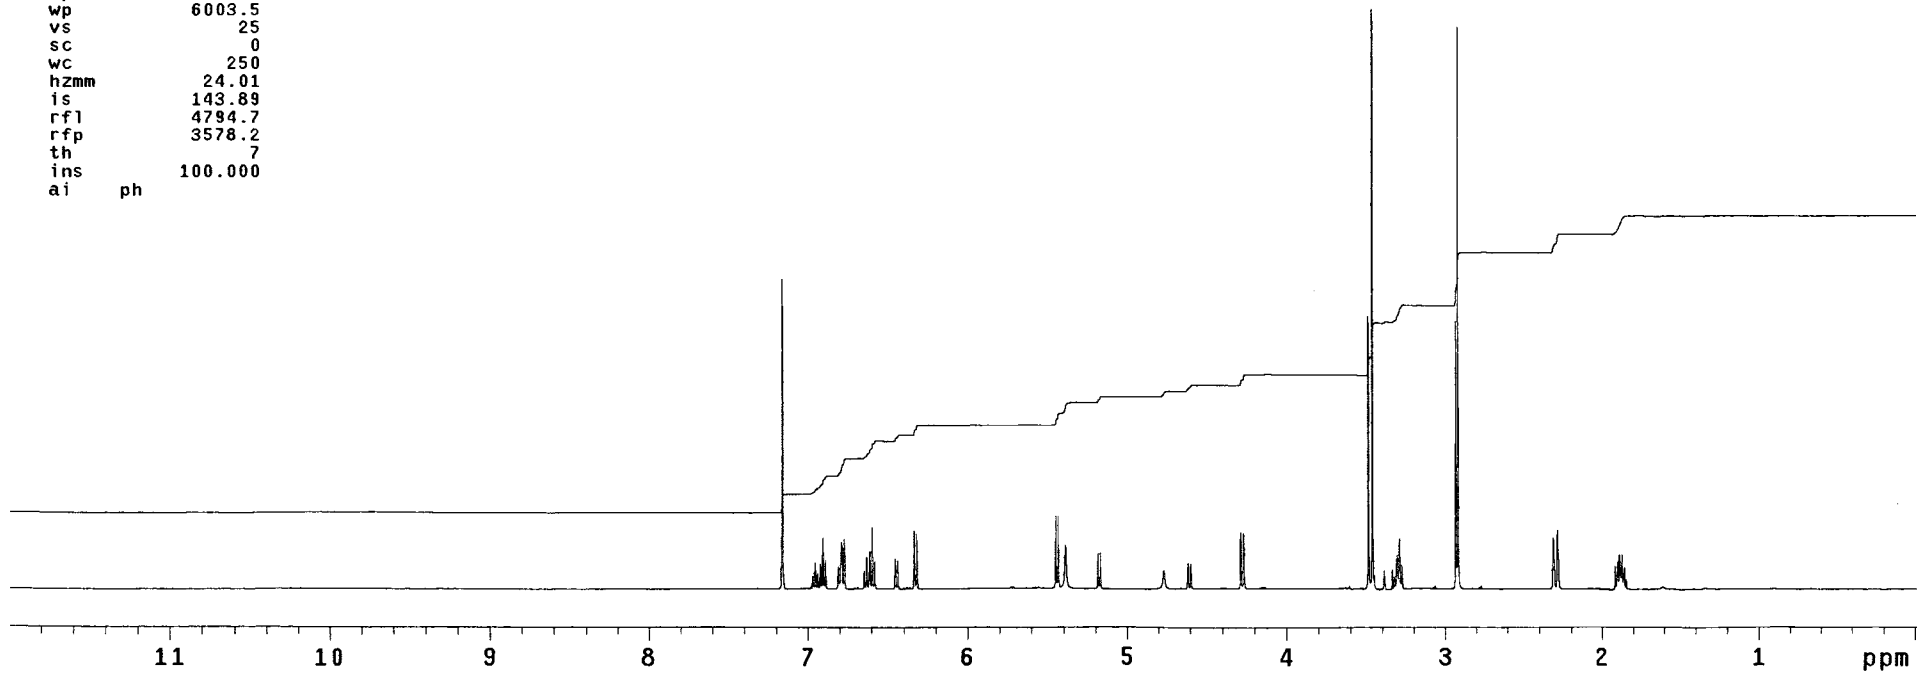



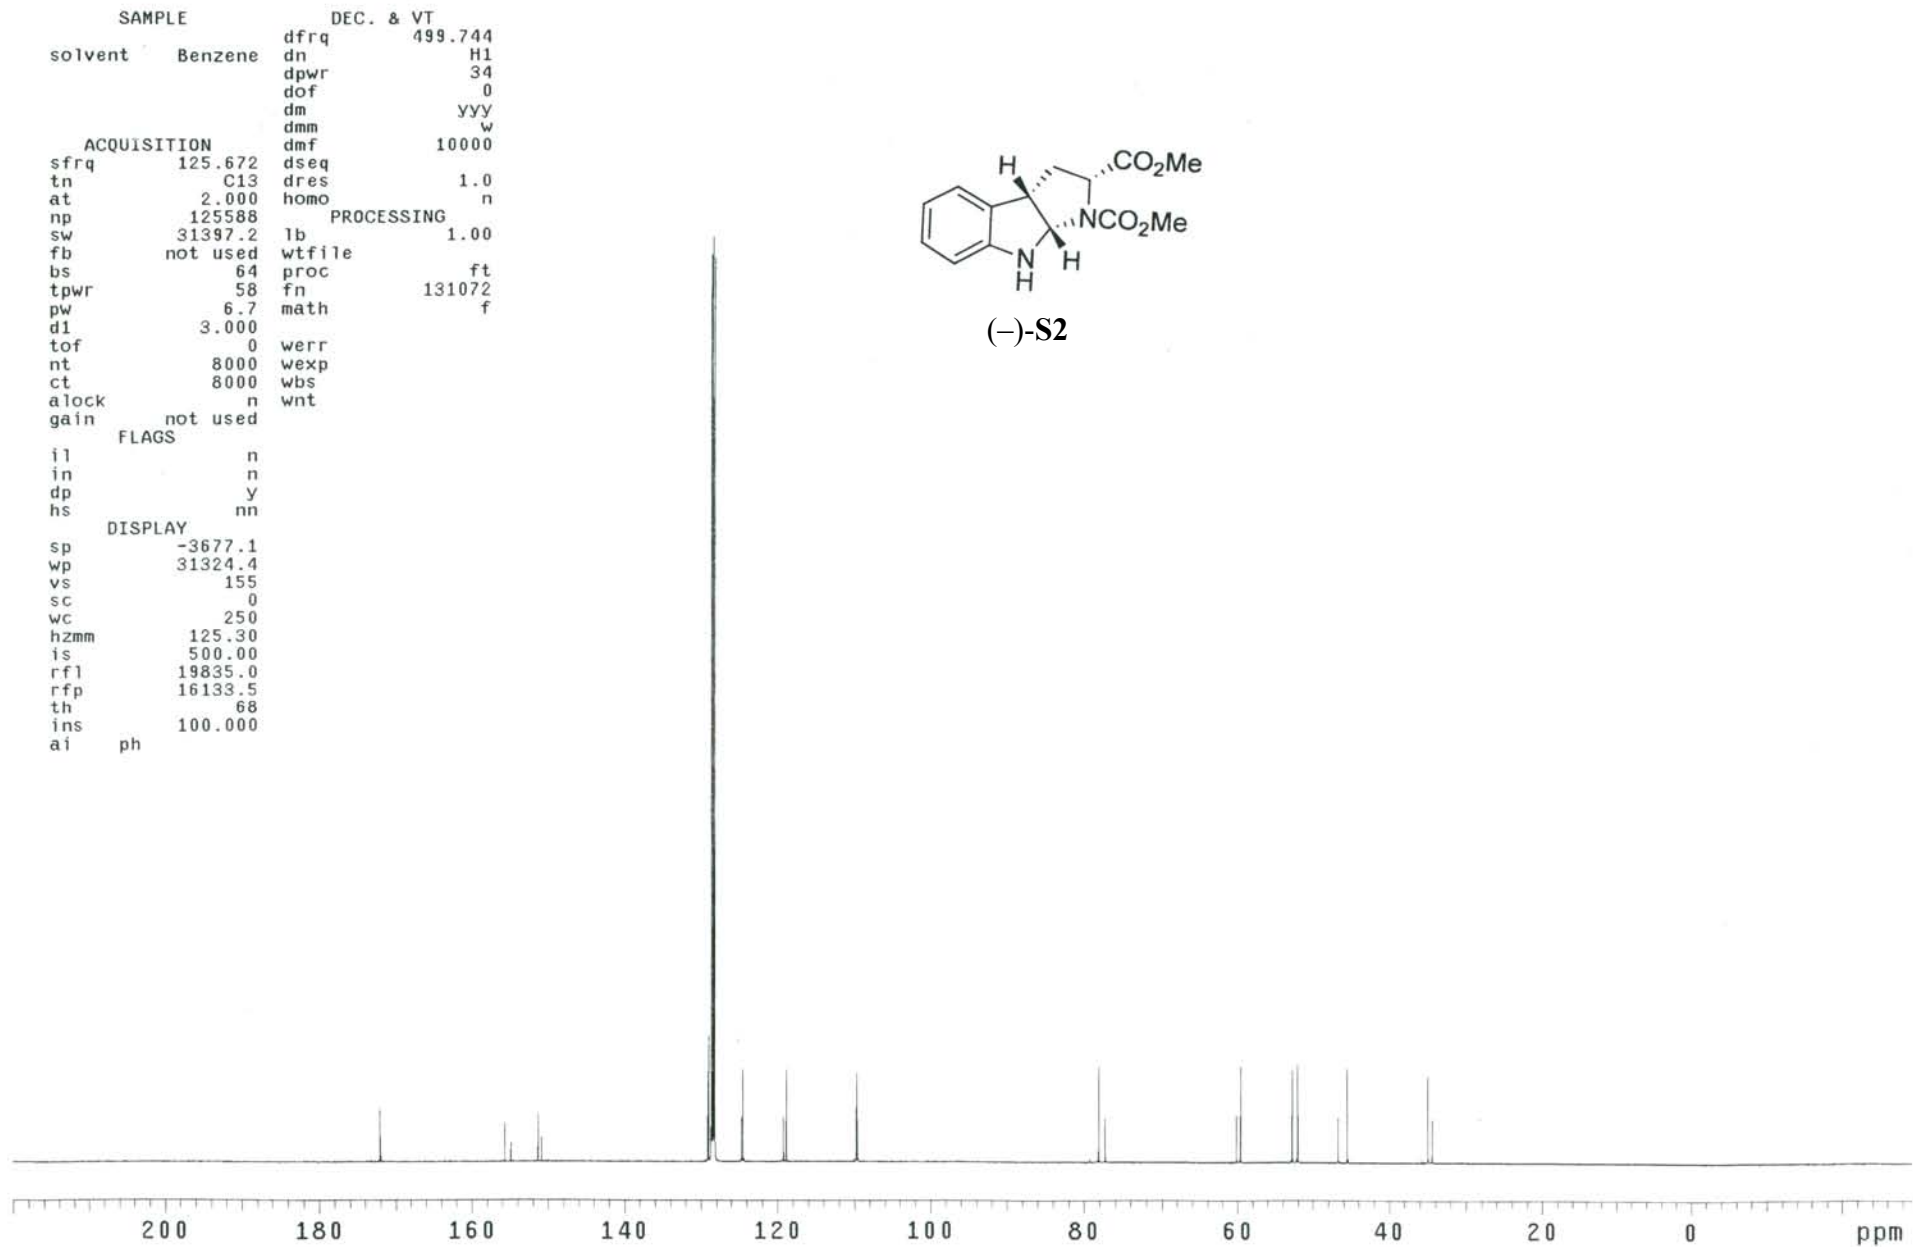

S82/S153

| SAMPLE      |          | DEC. & VT  |         |
|-------------|----------|------------|---------|
| solvent     | CD3CN    | dfrq       | 125.673 |
|             |          | dn         | C13     |
|             |          | dpwr       | 30      |
|             |          | dof        | 0       |
|             |          | dm         | nnn     |
|             |          | dmm        | w       |
|             |          | dmf        | 10000   |
|             |          | dseq       | 1.0     |
|             |          | dres       | n       |
|             |          | homo       | n       |
| ACQUISITION |          | PROCESSING |         |
| sfrq        | 499.748  | tn         | H1      |
| at          | 3.001    | wtfile     | ft      |
| np          | 63050    | fn         | 262144  |
| sw          | 10504.2  | math       | f       |
| fb          | not used |            |         |
| bs          | 4        | werr       |         |
| tpwr        | 56       | wexp       |         |
| pw          | 8.6      | wbs        |         |
| d1          | 2.000    | wnt        | wft     |
| tof         | 1519.5   |            |         |
| nt          | 16       |            |         |
| ct          | 16       |            |         |
| alock       | n        |            |         |
| gain        | not used |            |         |
| FLAGS       |          |            |         |
| il          | n        |            |         |
| in          | n        |            |         |
| dp          | y        |            |         |
| hs          | nn       |            |         |
| DISPLAY     |          |            |         |
| sp          | -503.6   |            |         |
| wp          | 6497.4   |            |         |
| vs          | 7        |            |         |
| sc          | 0        |            |         |
| wc          | 250      |            |         |
| hzmm        | 25.99    |            |         |
| is          | 201.44   |            |         |
| rfl         | 2218.8   |            |         |
| rfp         | 969.5    |            |         |
| th          | 7        |            |         |
| ins         | 100.000  |            |         |
| ai          | ph       |            |         |

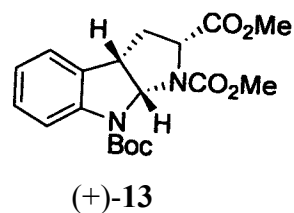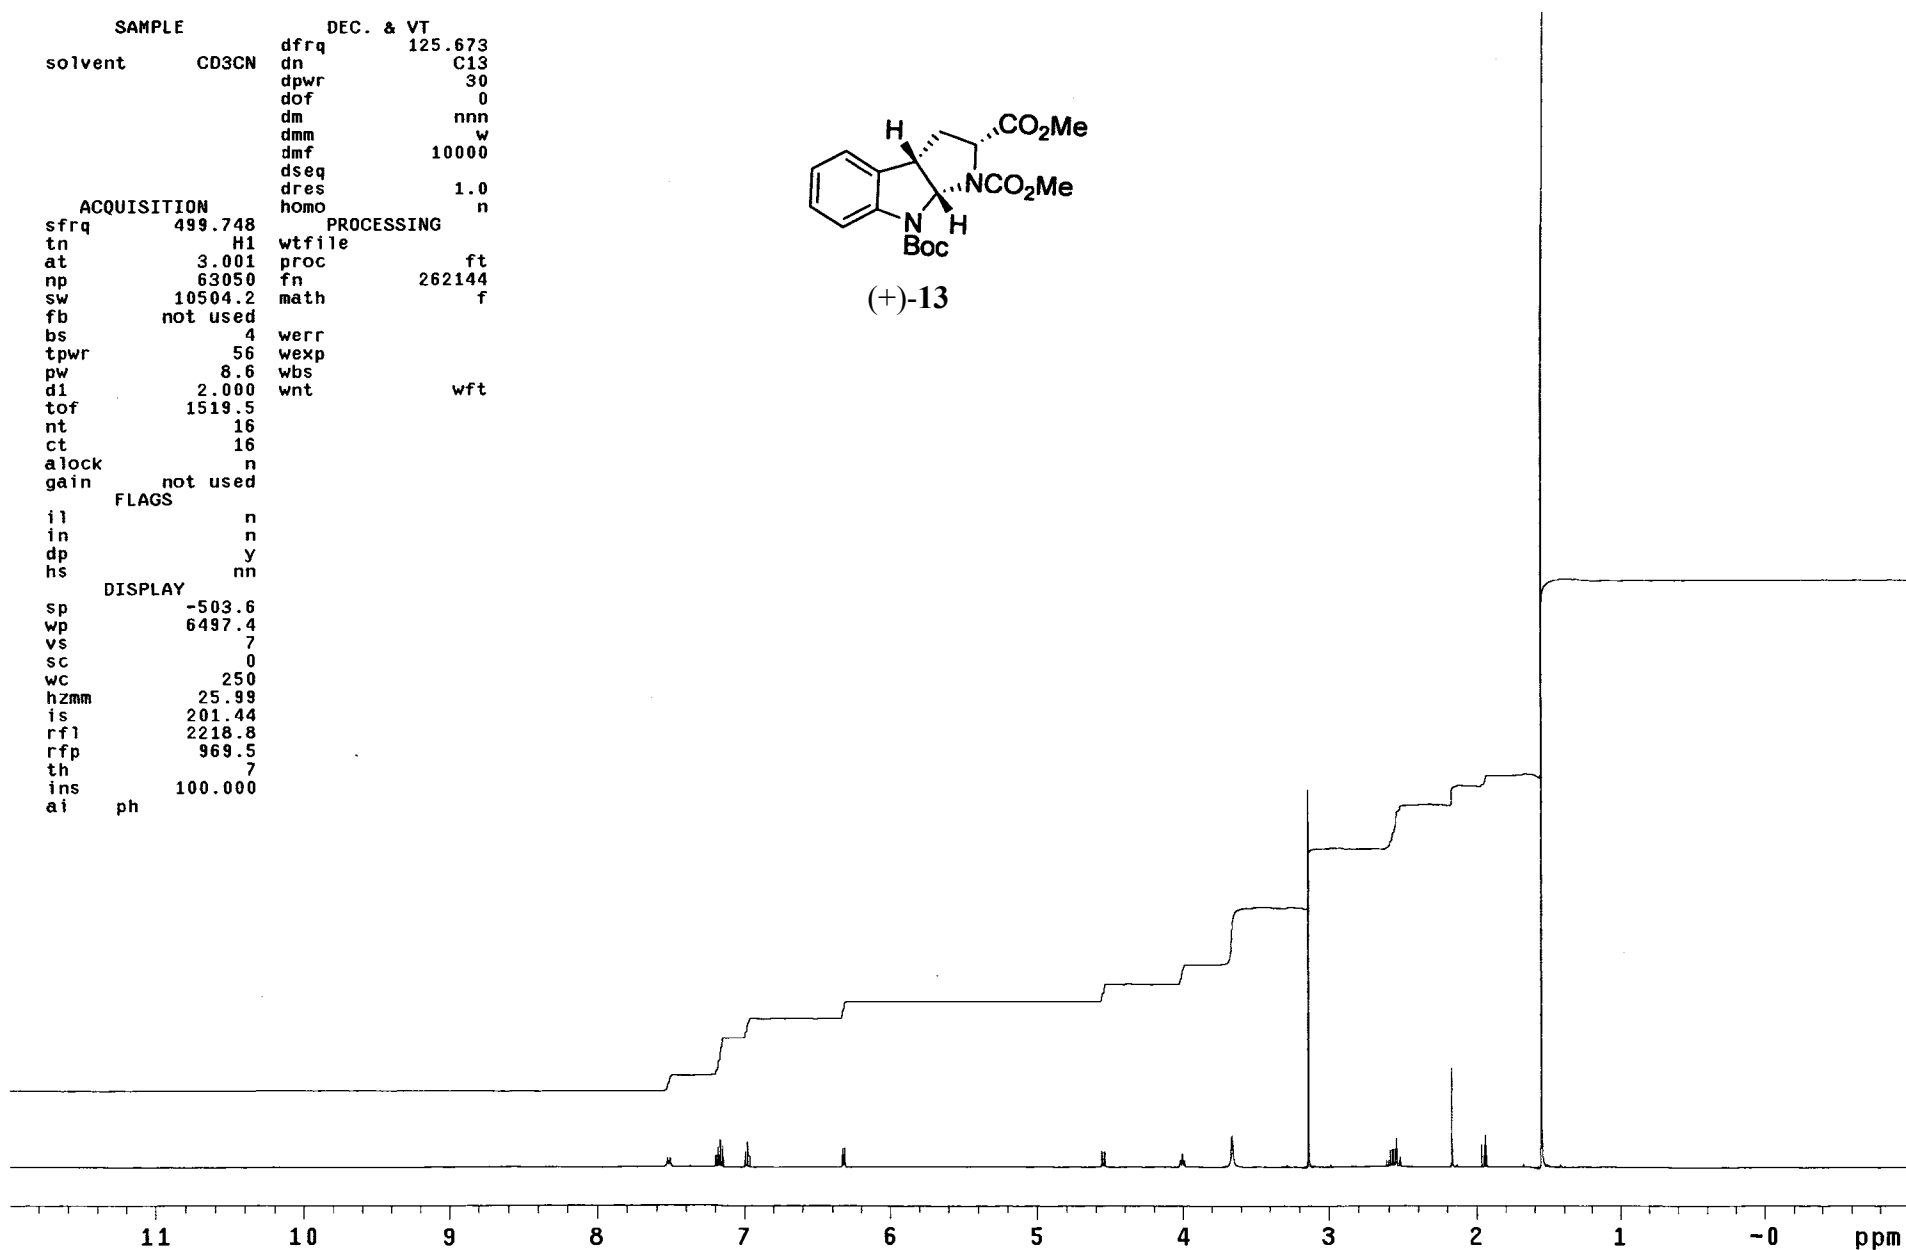

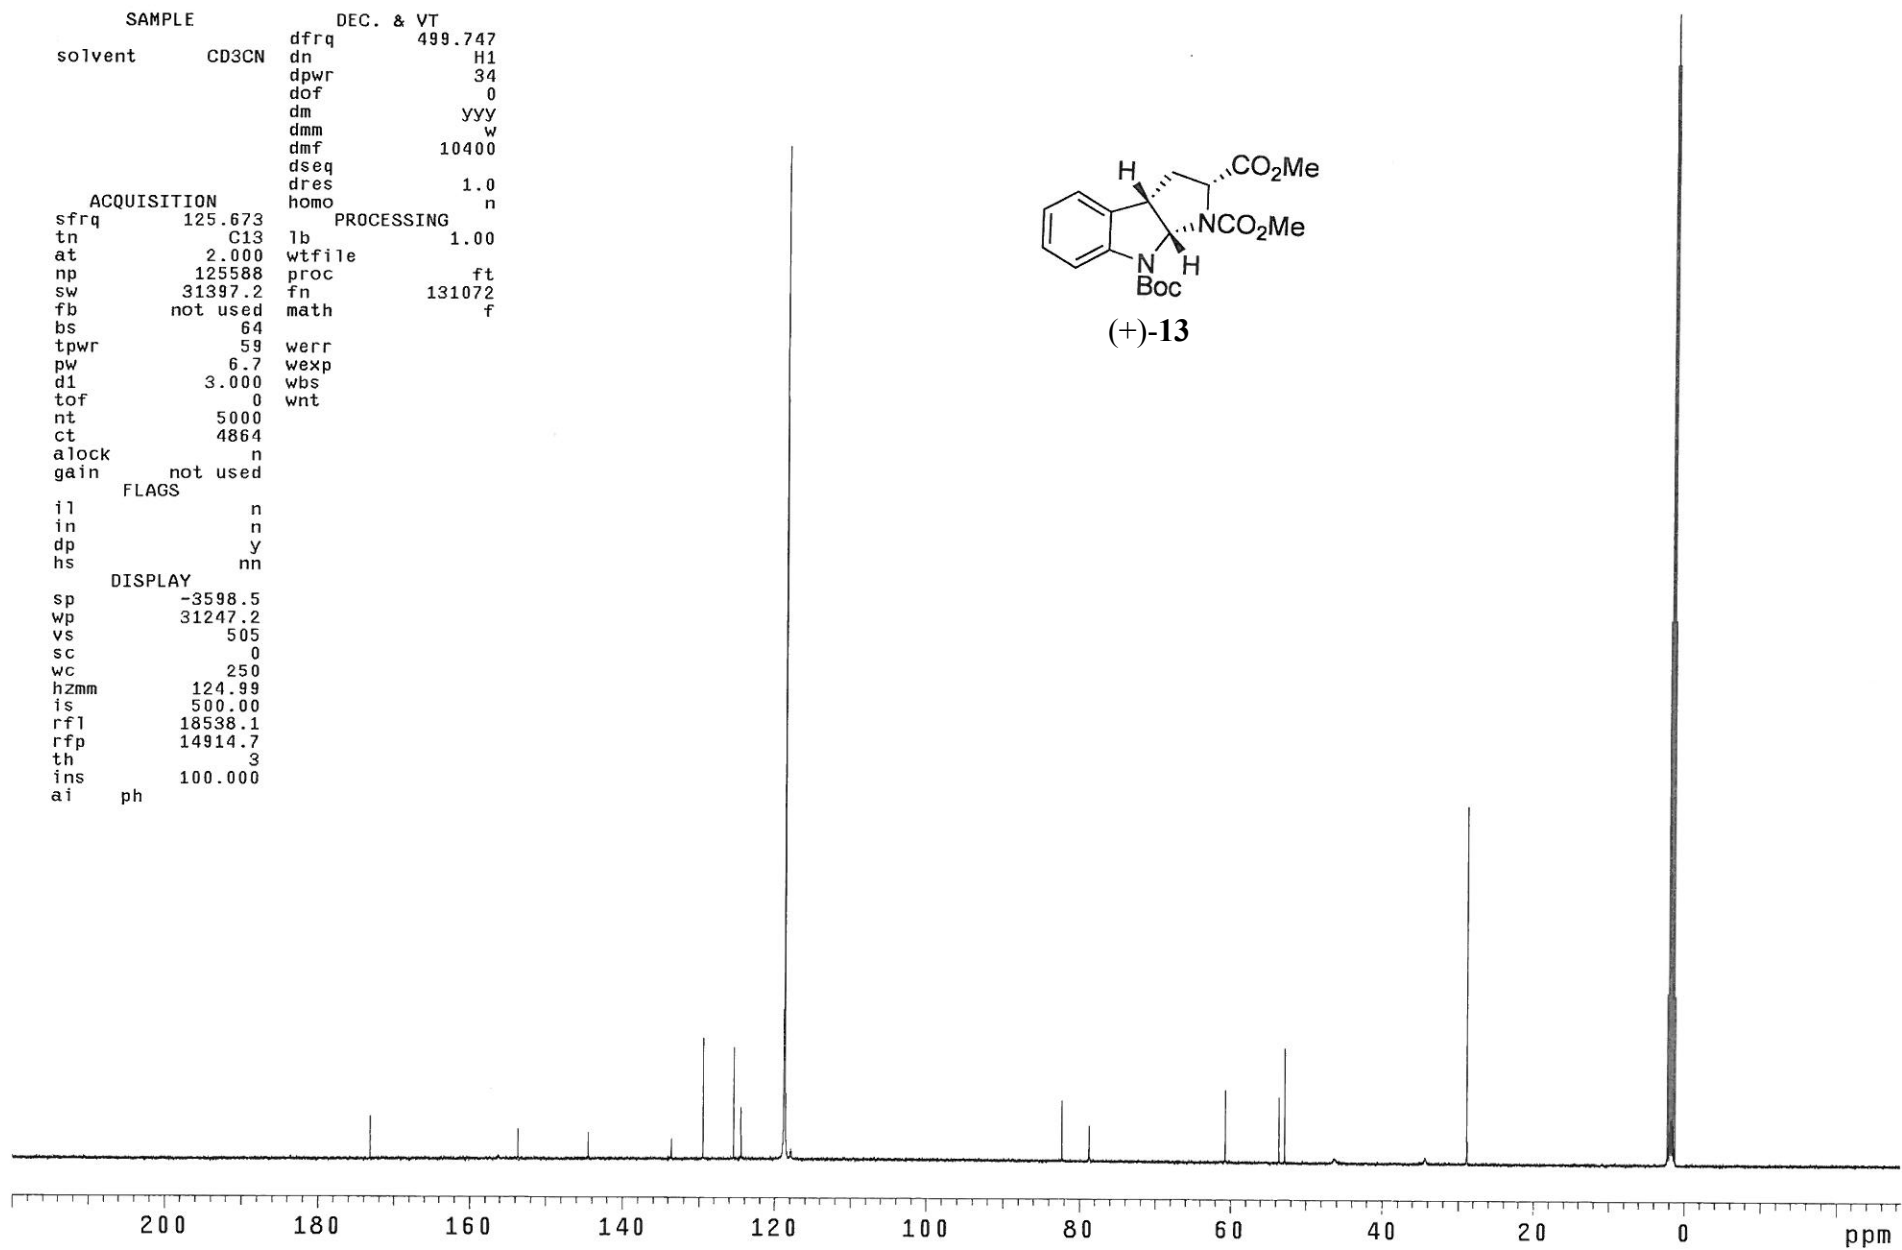

S84/S153

| SAMPLE      |          | DEC. & VT  |         |
|-------------|----------|------------|---------|
| solvent     | CD3CN    | dfrq       | 125.673 |
|             |          | dn         | C13     |
|             |          | dpwr       | 30      |
|             |          | dof        | 0       |
|             |          | dm         | nnn     |
|             |          | dmm        | w       |
|             |          | dmf        | 10000   |
|             |          | dseq       |         |
|             |          | dres       | 1.0     |
|             |          | homo       | n       |
| ACQUISITION |          | PROCESSING |         |
| sfrq        | 499.748  | wtfile     |         |
| tn          | H1       | proc       | ft      |
| at          | 3.001    | fn         | 262144  |
| np          | 63050    | math       | f       |
| sw          | 10504.2  |            |         |
| fb          | not used |            |         |
| bs          | 4        | werr       |         |
| tpwr        | 56       | wexp       |         |
| pw          | 8.6      | wbs        |         |
| d1          | 2.000    | wnt        | wft     |
| tof         | 1519.5   |            |         |
| nt          | 16       |            |         |
| ct          | 16       |            |         |
| alock       | n        |            |         |
| gain        | not used |            |         |
| FLAGS       |          |            |         |
| il          | n        |            |         |
| in          | n        |            |         |
| dp          | y        |            |         |
| hs          | nn       |            |         |
| DISPLAY     |          |            |         |
| sp          | -509.6   |            |         |
| wp          | 6503.4   |            |         |
| vs          | 7        |            |         |
| sc          | 0        |            |         |
| wc          | 250      |            |         |
| hzmm        | 26.01    |            |         |
| ls          | 158.18   |            |         |
| rfl         | 2218.9   |            |         |
| rfp         | 969.5    |            |         |
| th          | 7        |            |         |
| ins         | 100.000  |            |         |
| ai          | ph       |            |         |

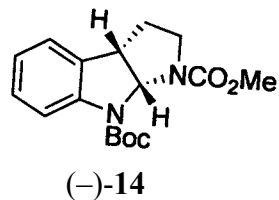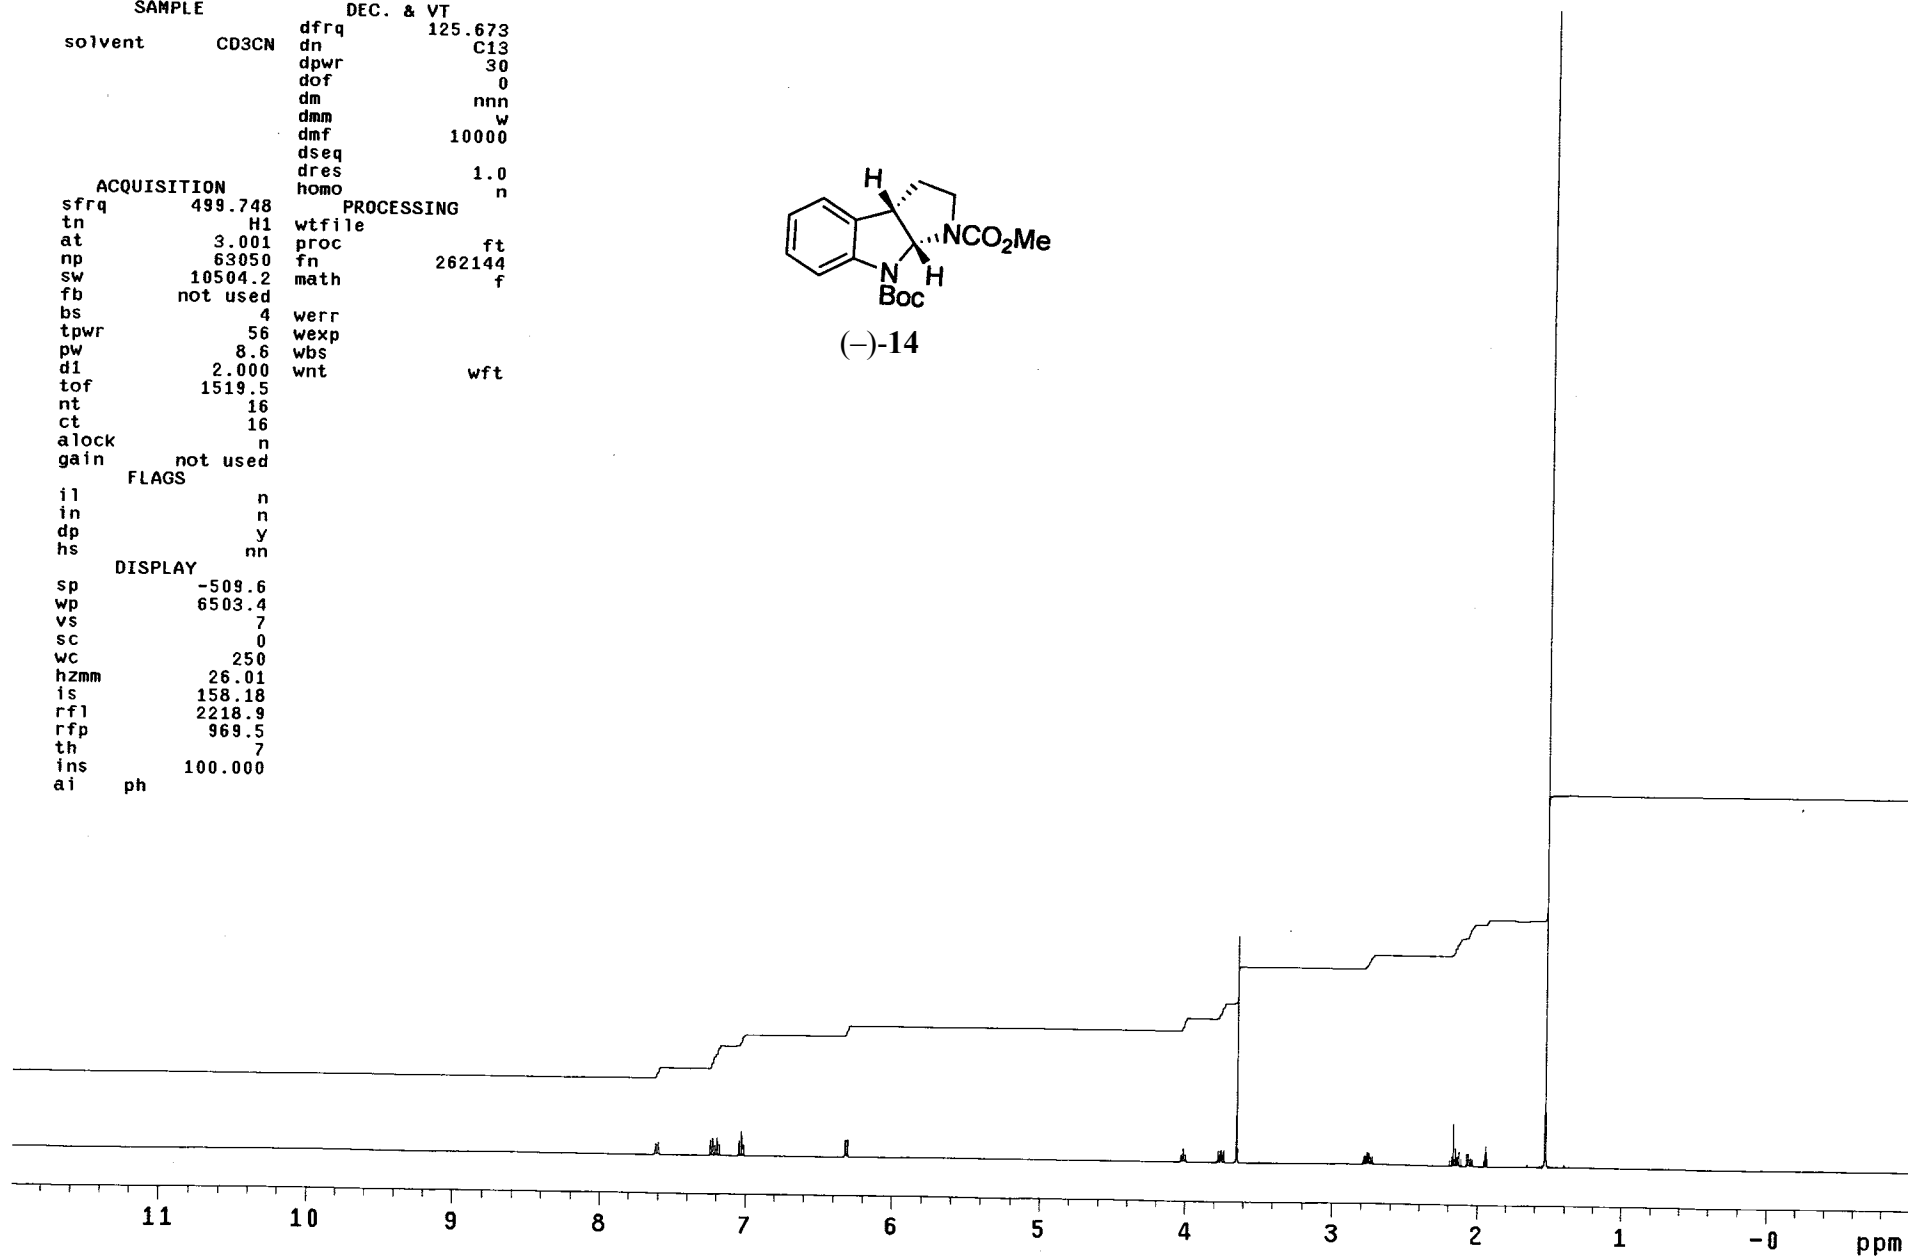

S85/S153

|             |          |            |         |
|-------------|----------|------------|---------|
| SAMPLE      |          | DEC. & VT  |         |
| solvent     | CD3CN    | dfrq       | 500.232 |
|             |          | dn         | H1      |
|             |          | dpwr       | 39      |
|             |          | dof        | -500.0  |
|             |          | dm         | y       |
|             |          | dmm        | w       |
|             |          | dmf        | 10000   |
| ACQUISITION |          | dseq       |         |
| sfrq        | 125.795  | dres       | 1.0     |
| tn          | C13      | homo       | n       |
| at          | 1.736    |            |         |
| np          | 131010   | PROCESSING |         |
| sw          | 37735.8  | lb         | 0.30    |
| fb          | not used | wtfile     |         |
| bs          | 32       | proc       | ft      |
| ss          | 1        | fn         | 131072  |
| tpwr        | 58       | math       | f       |
| pw          | 6.9      |            |         |
| d1          | 0.763    | werr       |         |
| tof         | 631.4    | wexp       |         |
| nt          | 10000    | wbs        |         |
| ct          | 10000    | wnt        |         |
| alock       | n        |            |         |
| gain        | not used |            |         |
| FLAGS       |          |            |         |
| il          | n        |            |         |
| in          | n        |            |         |
| dp          | y        |            |         |
| hs          | nn       |            |         |
| DISPLAY     |          |            |         |
| sp          | -2559.1  |            |         |
| wp          | 30200.3  |            |         |
| vs          | 710      |            |         |
| sc          | 0        |            |         |
| wc          | 250      |            |         |
| hzmm        | 120.80   |            |         |
| is          | 500.00   |            |         |
| rfl         | 21073.8  |            |         |
| rfp         | 14929.2  |            |         |
| th          | 20       |            |         |
| ins         | 1.000    |            |         |
| ai          | ph       |            |         |

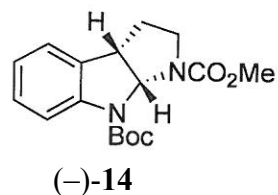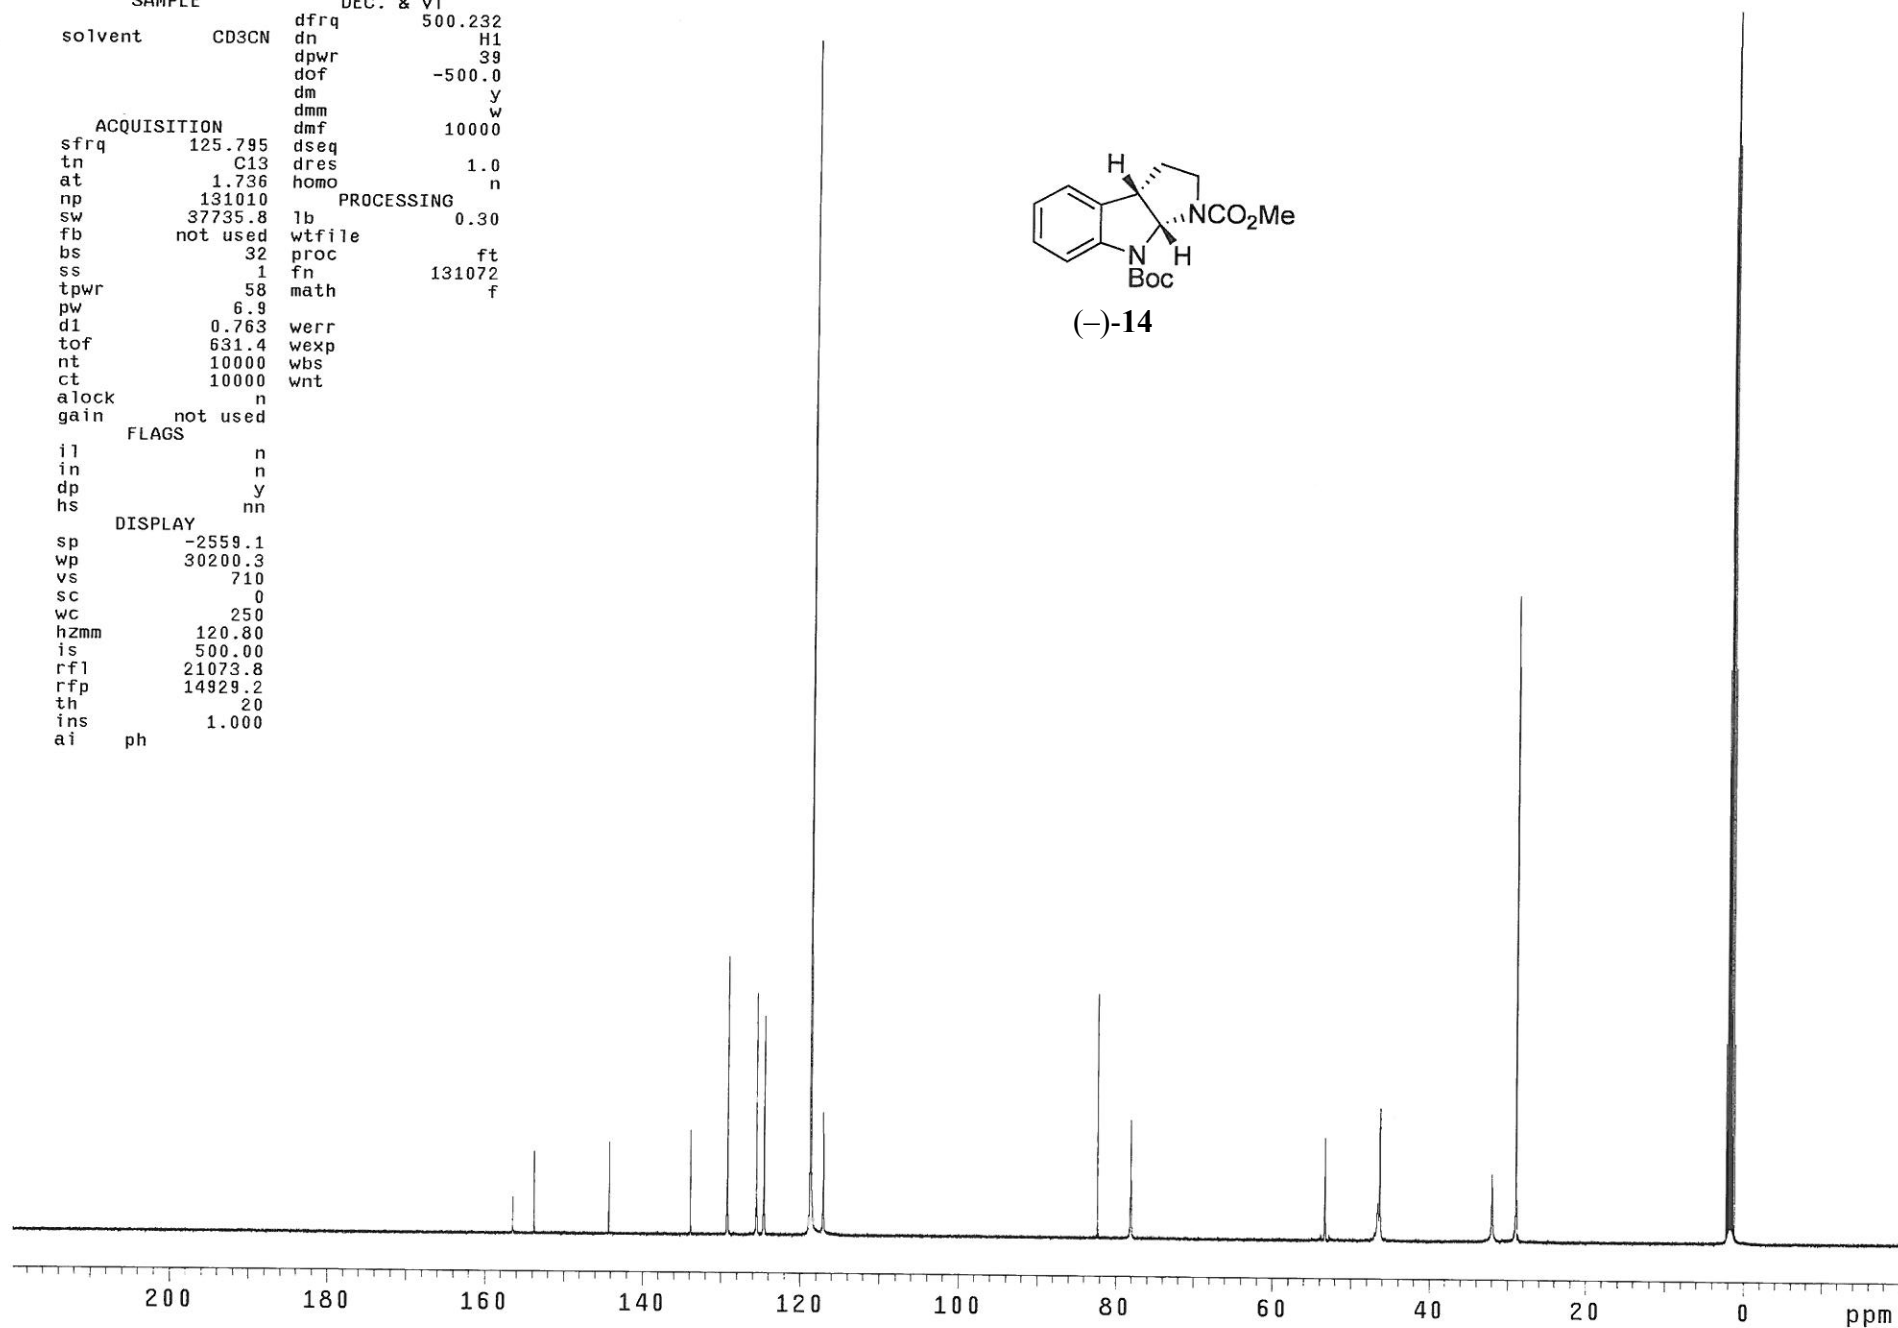

| SAMPLE      |          | DEC. & VT  |         |
|-------------|----------|------------|---------|
| solvent     | CD3CN    | dfrq       | 125.673 |
|             |          | dn         | C13     |
|             |          | dpwr       | 30      |
|             |          | dof        | 0       |
|             |          | dm         | nnn     |
|             |          | dmm        | w       |
|             |          | dmf        | 10000   |
|             |          | dseq       |         |
|             |          | dres       | 1.0     |
|             |          | homo       | n       |
| ACQUISITION |          | PROCESSING |         |
| sfrq        | 499.748  | wtfile     |         |
| tn          | H1       | proc       | ft      |
| at          | 3.001    | fn         | 262144  |
| np          | 63050    | math       | f       |
| sw          | 10504.2  |            |         |
| fb          | not used |            |         |
| bs          | 4        | werr       |         |
| tpwr        | 56       | wexp       |         |
| pw          | 8.6      | wbs        |         |
| d1          | 2.000    | wnt        | wft     |
| tof         | 1519.5   |            |         |
| nt          | 16       |            |         |
| ct          | 12       |            |         |
| alock       | n        |            |         |
| gain        | not used |            |         |
| FLAGS       |          |            |         |
| il          | n        |            |         |
| in          | n        |            |         |
| dp          | y        |            |         |
| hs          | nn       |            |         |
| DISPLAY     |          |            |         |
| sp          | -500.4   |            |         |
| wp          | 6494.3   |            |         |
| vs          | 10       |            |         |
| sc          | 0        |            |         |
| wc          | 250      |            |         |
| hzmm        | 25.98    |            |         |
| is          | 132.51   |            |         |
| rfl         | 2218.9   |            |         |
| rfp         | 969.5    |            |         |
| th          | 7        |            |         |
| ins         | 100.000  |            |         |
| ai          | ph       |            |         |

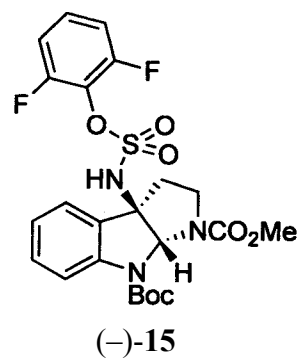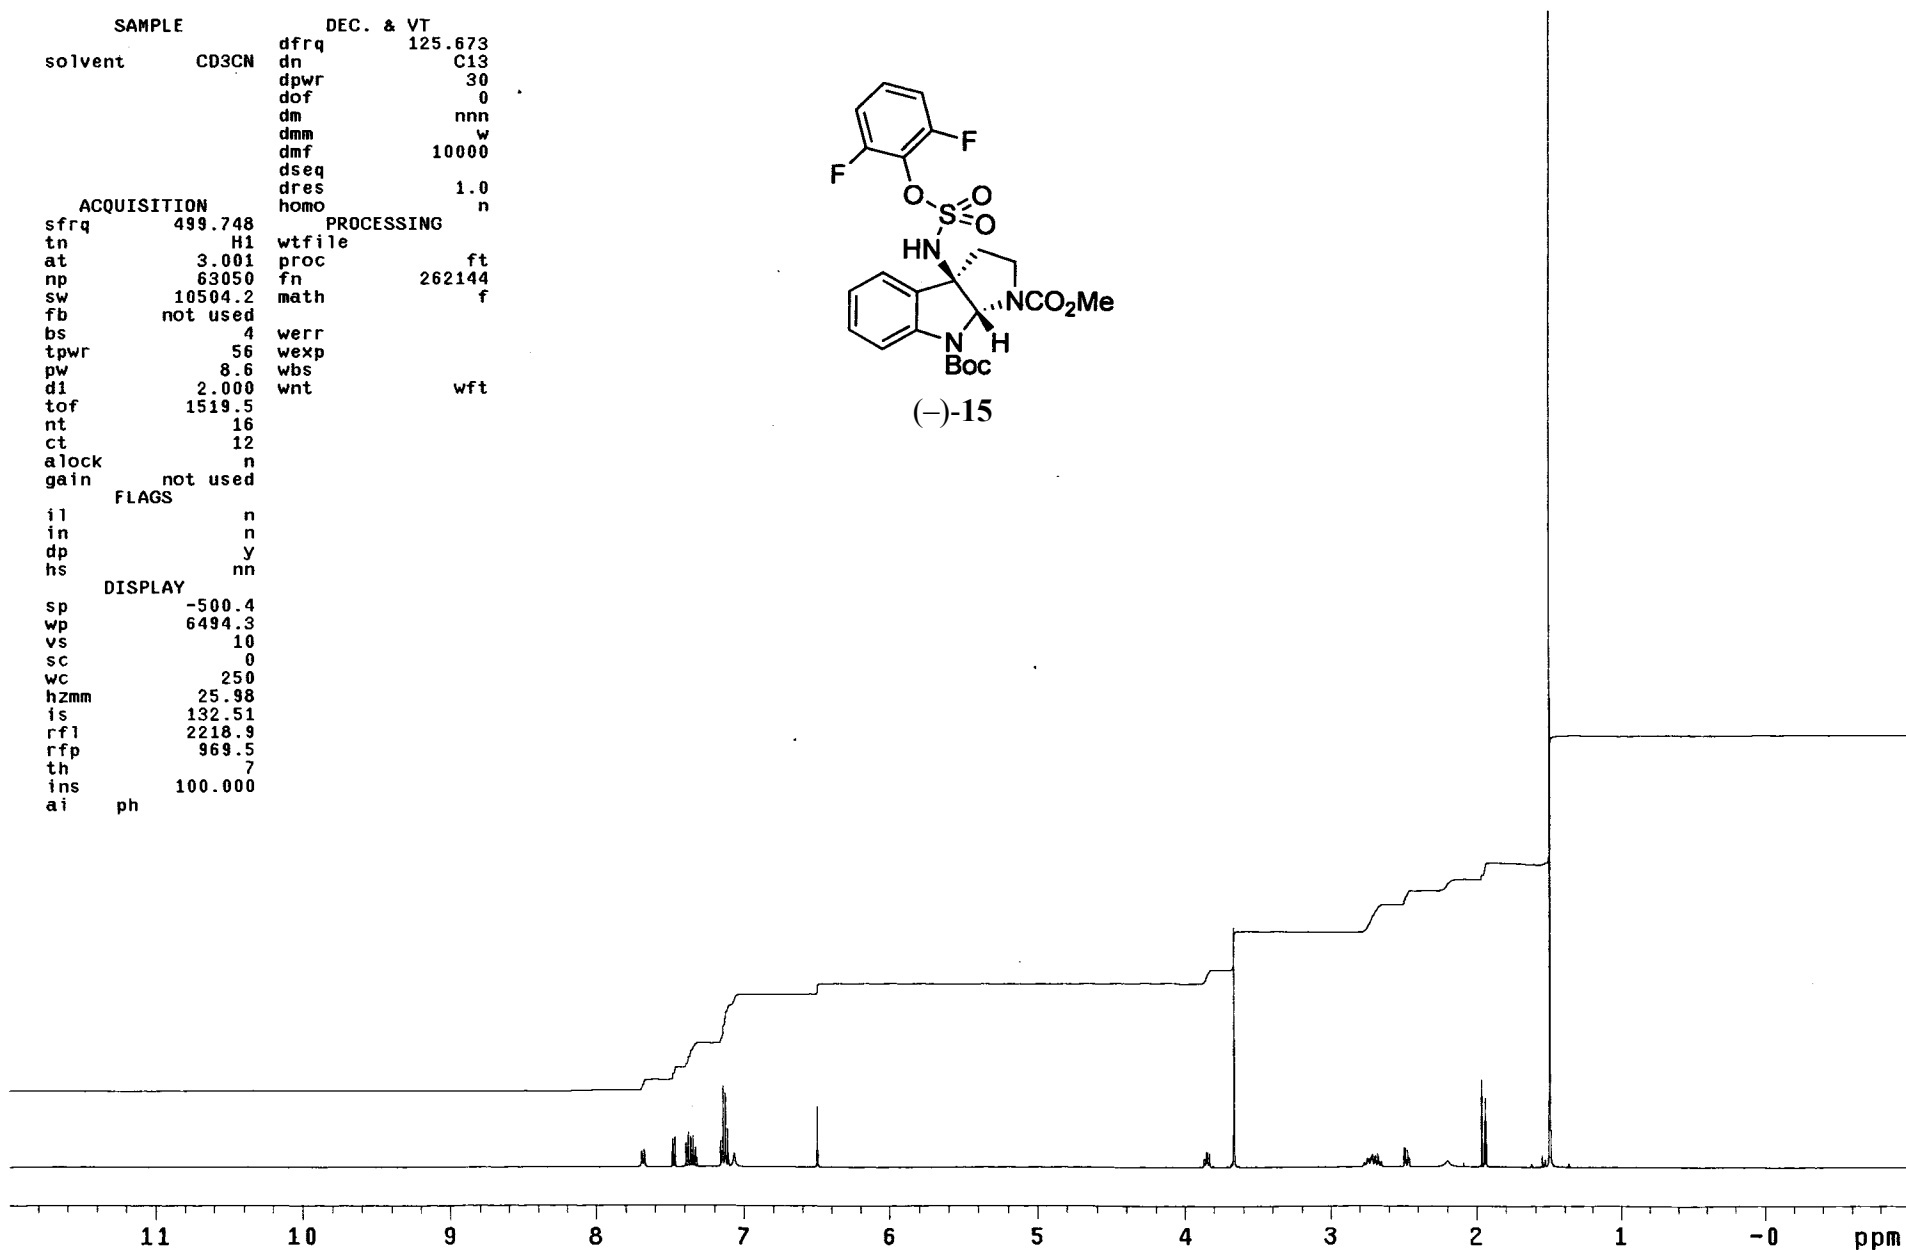

S87/S153

| SAMPLE      |          | DEC. & VT  |         |
|-------------|----------|------------|---------|
| solvent     | CD3CN    | dfrq       | 500.232 |
|             |          | dn         | H1      |
|             |          | dpwr       | 38      |
|             |          | doF        | -500.0  |
|             |          | dm         | y       |
|             |          | dmm        | w       |
|             |          | dmf        | 10700   |
|             |          | dseq       |         |
|             |          | dres       | 1.0     |
|             |          | homo       | n       |
| ACQUISITION |          | PROCESSING |         |
| sfrq        | 125.795  | lb         | 0.30    |
| tn          | C13      | wtfile     |         |
| at          | 1.736    | proc       | ft      |
| np          | 131010   | fn         | 131072  |
| sw          | 37735.8  | math       | f       |
| fb          | not used |            |         |
| bs          | 64       |            |         |
| ss          | 1        | werr       |         |
| tpwr        | 59       | wexp       |         |
| pw          | 6.9      | wbs        |         |
| d1          | 0.763    | wnt        |         |
| tof         | 631.4    |            |         |
| nt          | 30000    |            |         |
| ct          | 17216    |            |         |
| alock       | n        |            |         |
| gain        | not used |            |         |
| FLAGS       |          |            |         |
| il          | n        |            |         |
| in          | n        |            |         |
| dp          | y        |            |         |
| hs          | nn       |            |         |
| DISPLAY     |          |            |         |
| sp          | -2536.1  |            |         |
| wp          | 30253.3  |            |         |
| vs          | 161      |            |         |
| sc          | 0        |            |         |
| wc          | 250      |            |         |
| hzmm        | 121.01   |            |         |
| is          | 500.00   |            |         |
| rfl         | 21075.0  |            |         |
| rfp         | 14929.2  |            |         |
| th          | 20       |            |         |
| ins         | 1.000    |            |         |
| ai          | ph       |            |         |

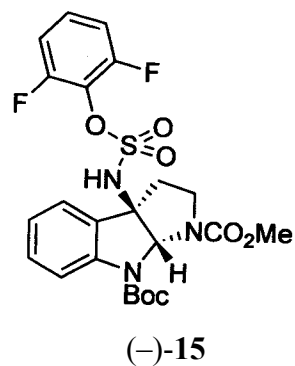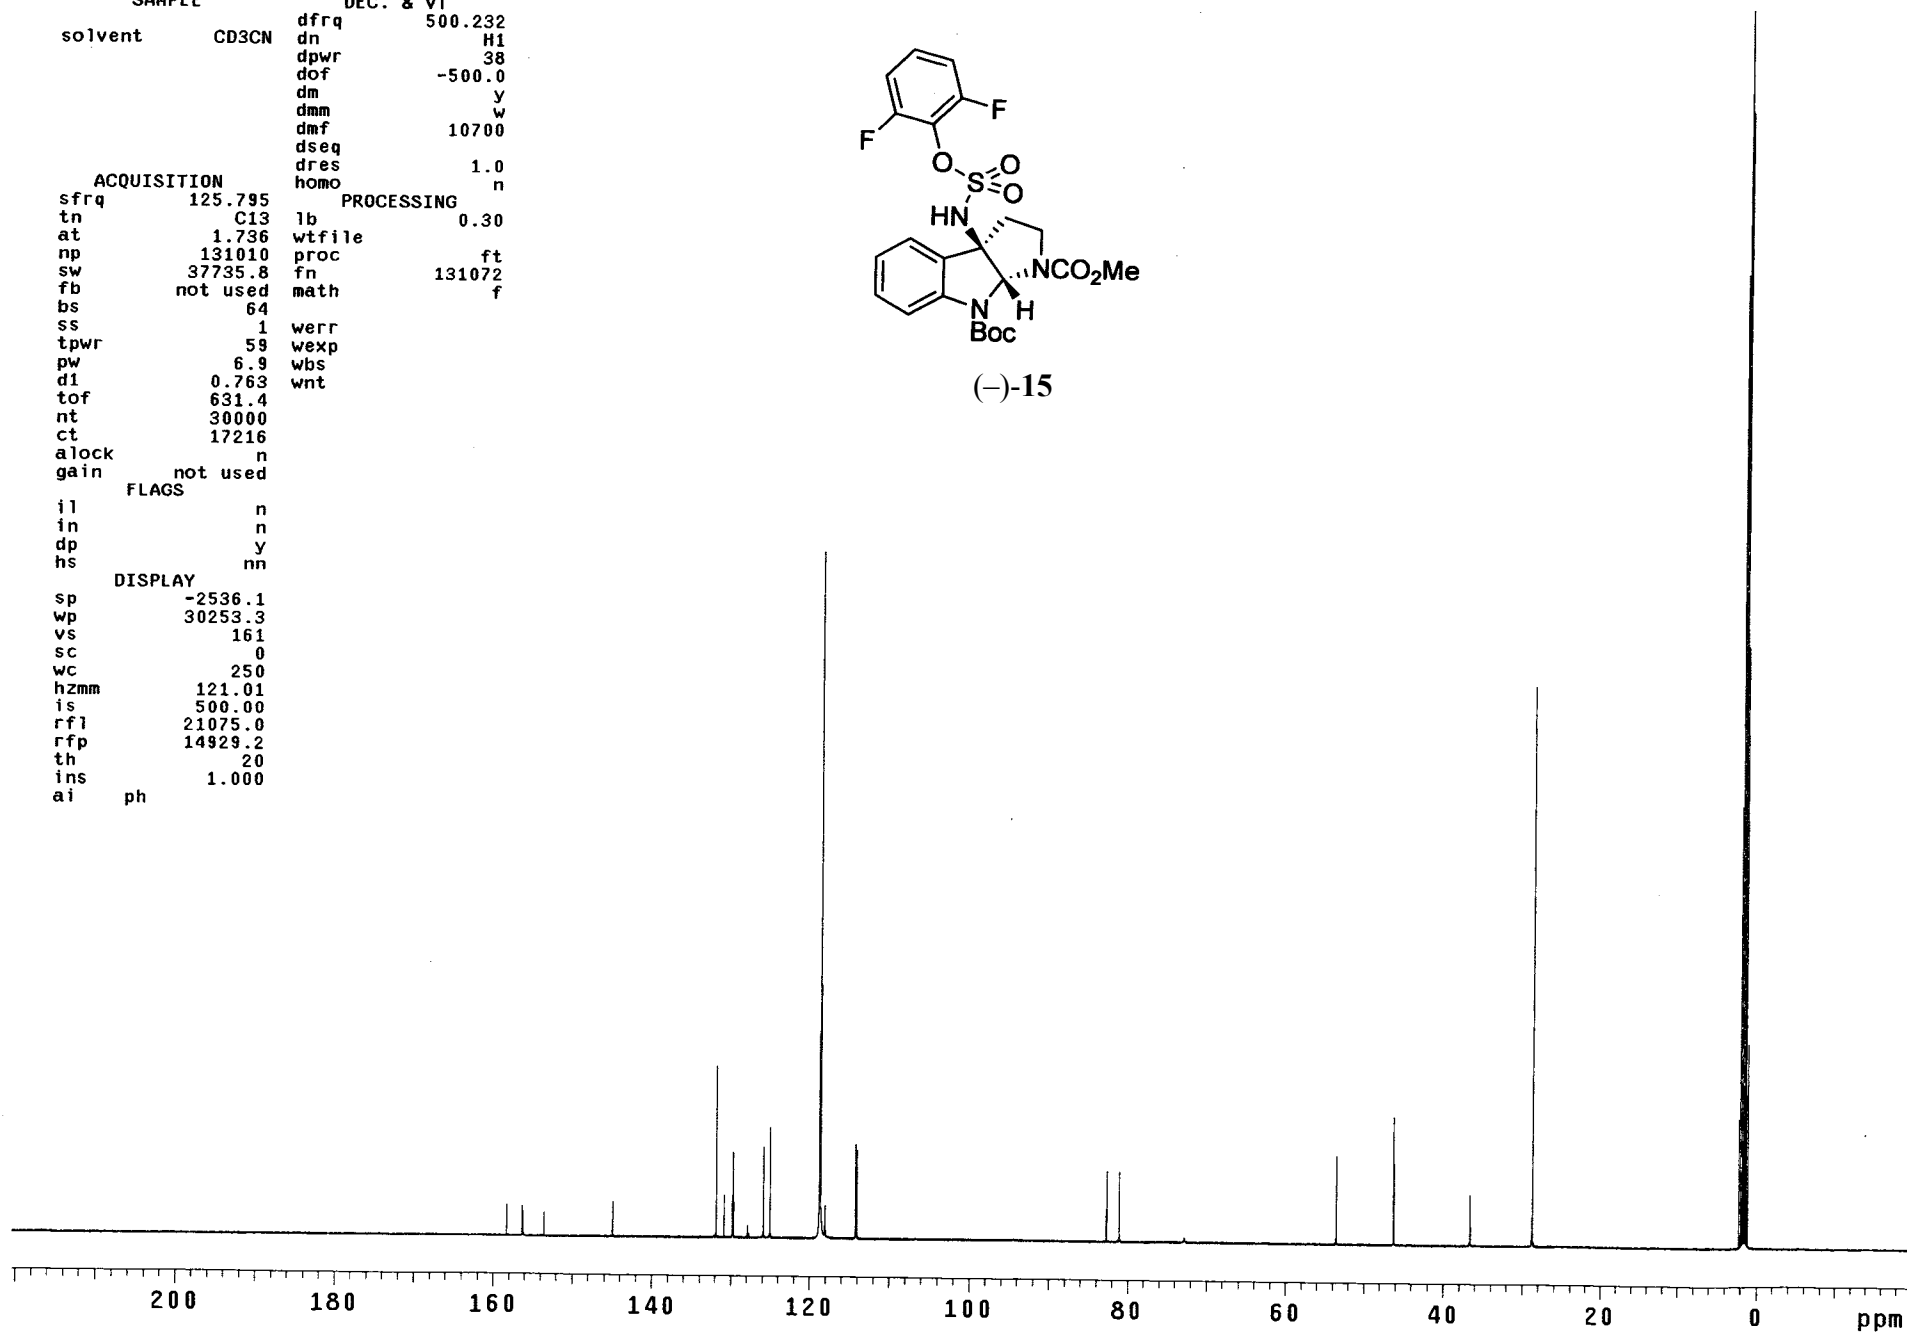

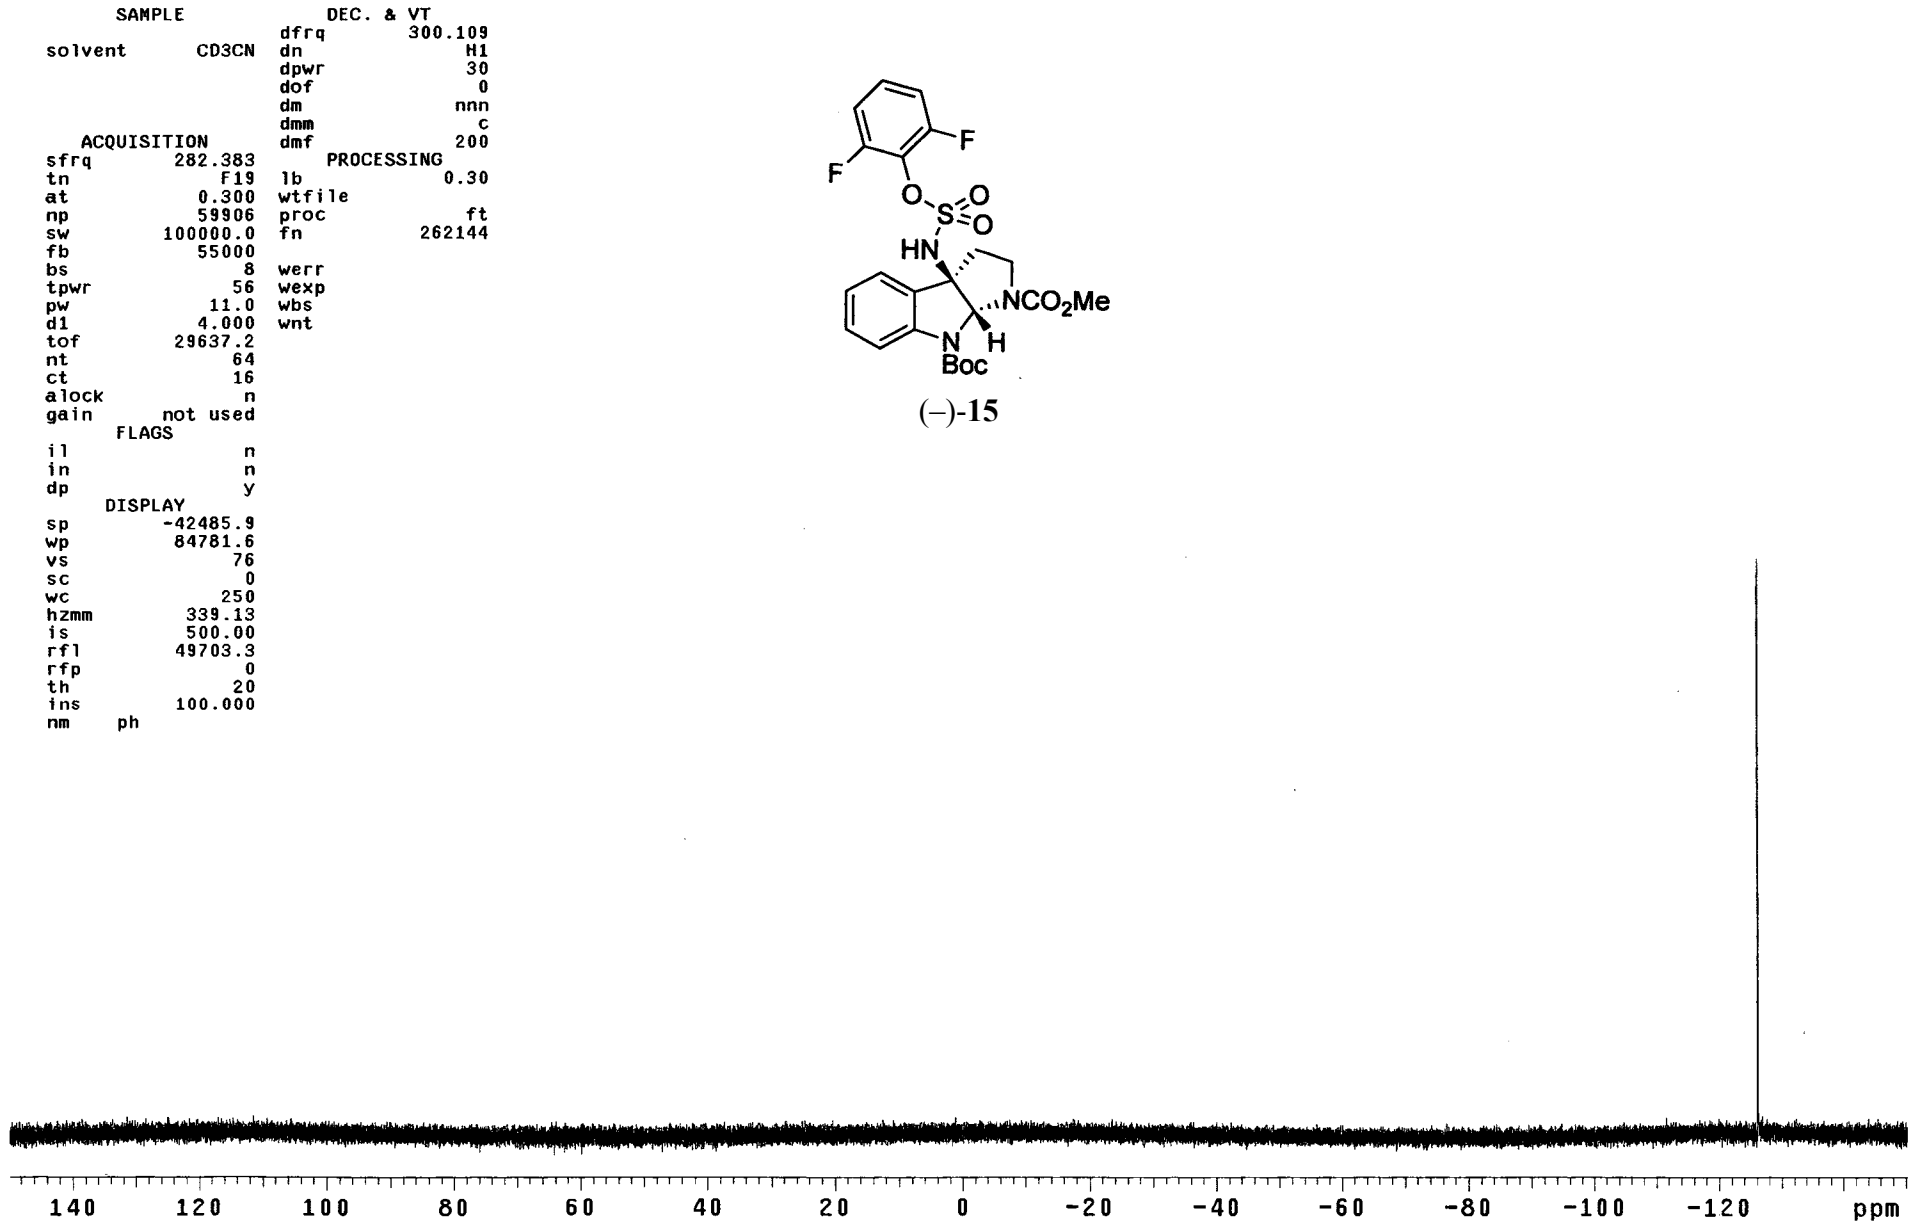



|             |          |            |         |
|-------------|----------|------------|---------|
| SAMPLE      |          | DEC. & VT  |         |
| solvent     | CD3CN    | dfrq       | 125.673 |
|             |          | dn         | C13     |
|             |          | dpwr       | 30      |
|             |          | dof        | 0       |
|             |          | dm         | nnn     |
|             |          | dmm        | w       |
|             |          | dmf        | 10000   |
|             |          | dseq       | 1.0     |
|             |          | dres       | n       |
|             |          | homo       | n       |
| ACQUISITION |          | PROCESSING |         |
| sfrq        | 499.748  | wtfile     |         |
| tn          | H1       | proc       | ft      |
| at          | 3.001    | fn         | 262144  |
| np          | 63050    | math       | f       |
| sw          | 10504.2  |            |         |
| fb          | not used |            |         |
| bs          | 4        | werr       |         |
| tpwr        | 56       | wexp       |         |
| pw          | 8.6      | wbs        |         |
| d1          | 2.000    | wnt        | wft     |
| tof         | 1519.5   |            |         |
| nt          | 16       |            |         |
| ct          | 16       |            |         |
| alock       | n        |            |         |
| gain        | not used |            |         |
| FLAGS       |          |            |         |
| il          | n        |            |         |
| in          | n        |            |         |
| dp          | y        |            |         |
| hs          | nn       |            |         |
| DISPLAY     |          |            |         |
| sp          | -518.7   |            |         |
| wp          | 6521.7   |            |         |
| vs          | 11       |            |         |
| sc          | 0        |            |         |
| wc          | 250      |            |         |
| hzmm        | 26.09    |            |         |
| is          | 113.83   |            |         |
| rfl         | 2218.9   |            |         |
| rfp         | 969.5    |            |         |
| th          | 7        |            |         |
| ins         | 100.000  |            |         |
| ai          | ph       |            |         |

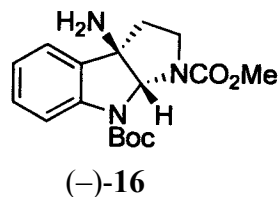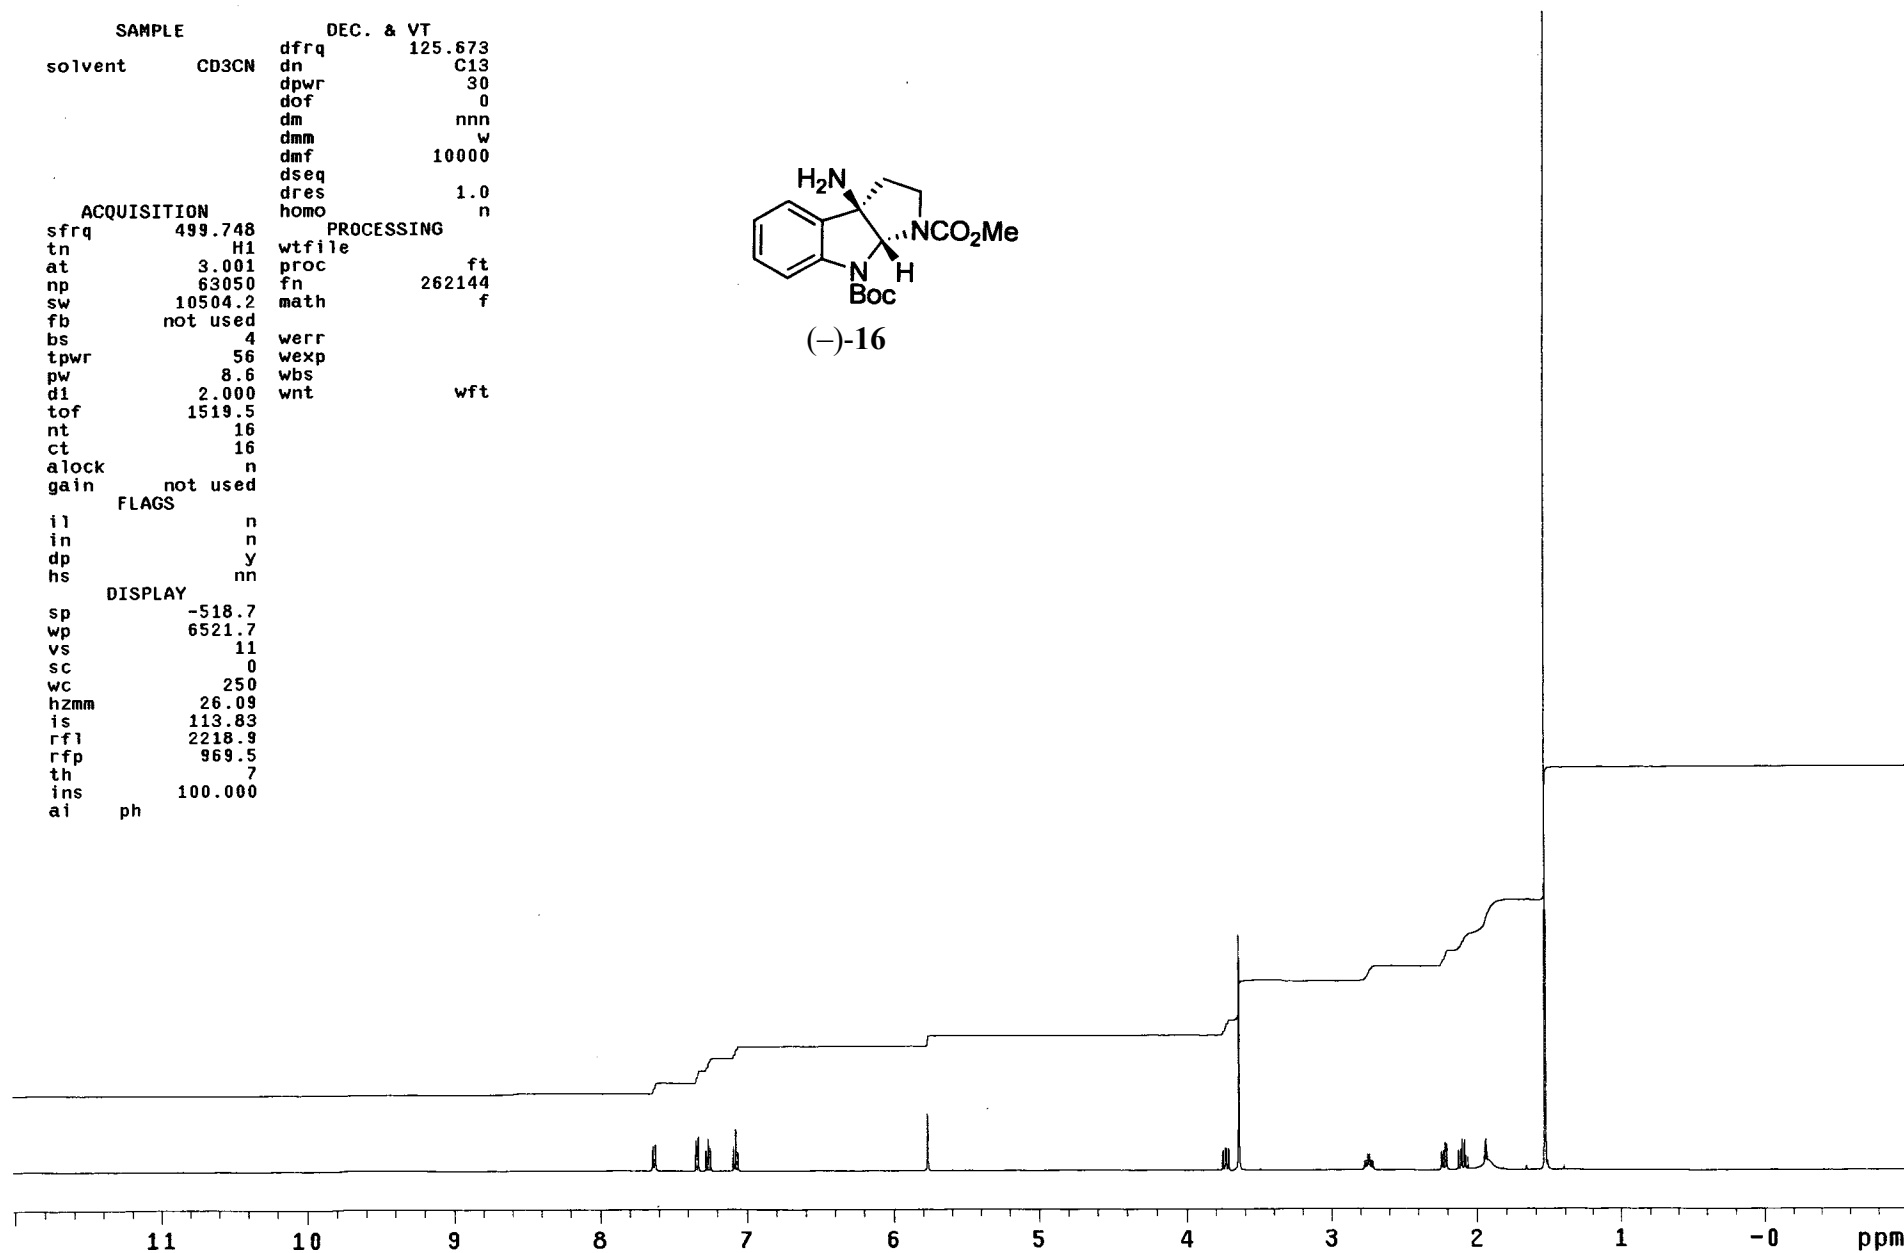

```
SAMPLE          DEC. & VT
solvent          CD3CN    dfrq      500.232
                   dn      H1
                   dpwr     39
                   dof     -500.0
                   dm       y
                   dmm       w
                   dmf     10000
                   dseq
                   dres      1.0
                   homo     n

ACQUISITION      PROCESSING
sfrq      125.795    lb      0.30
tn         C13      wtfile
at         1.736     proc
np        131010     fn      131072
sw        37735.8    math    f
fb         not used
bs         32
ss         1        werr
tpwr       58       wexp
pw         6.9      wbs
d1         0.763    wnt
tof        631.4
nt         20000
ct         6432
alock      n
gain       not used

FLAGS
il         n
in         n
dp         y
hs         nn

DISPLAY
sp         -2501.0
wp         30188.2
vs         361
sc         0
wc         250
hzmm       120.75
is         500.00
rfl        21072.7
rfp        14929.2
th         20
ins        1.000
ai         ph
```

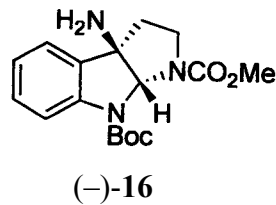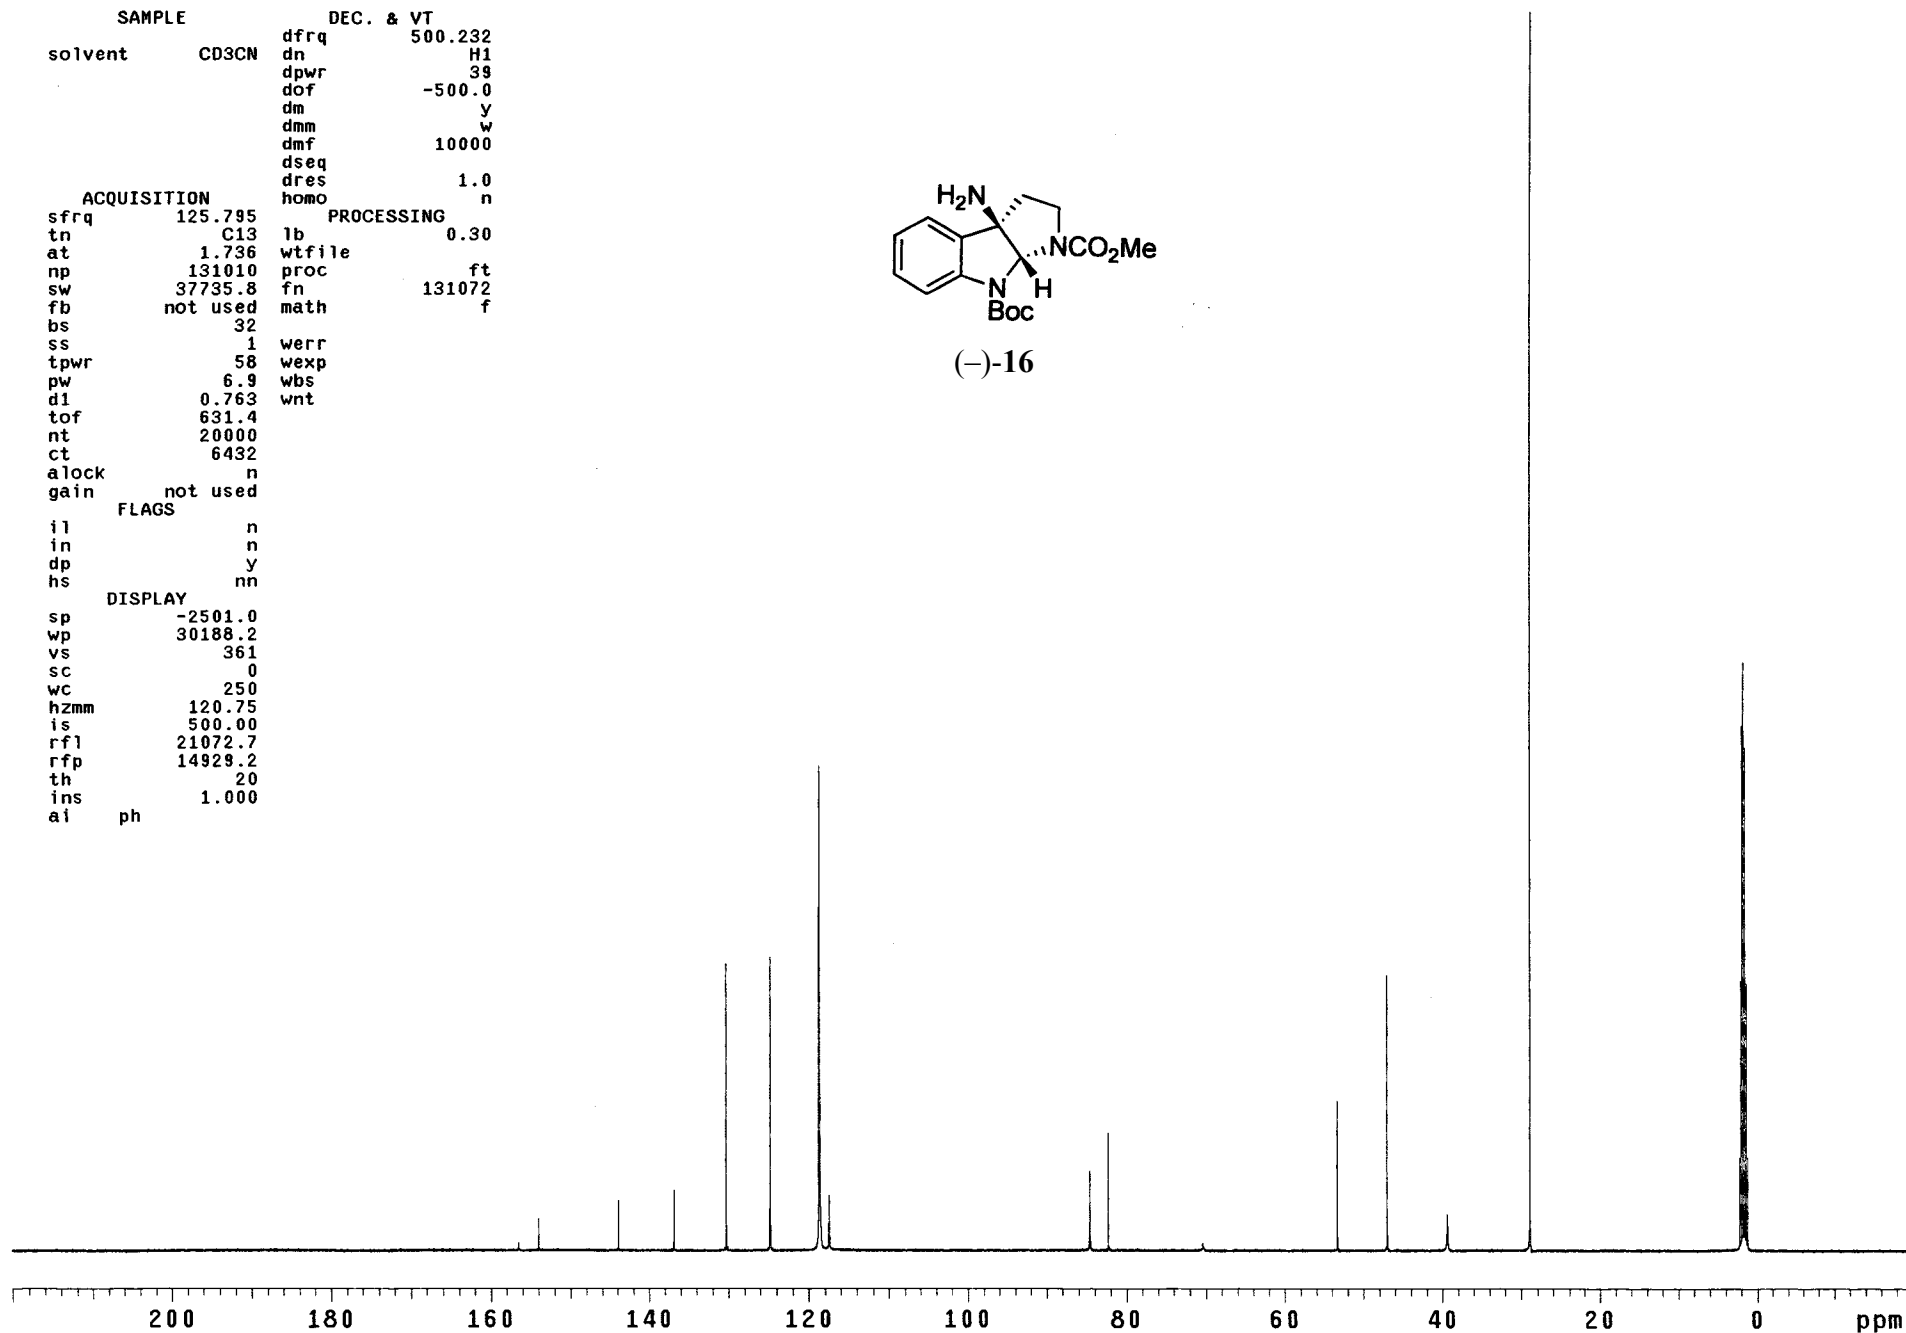

S91/S153

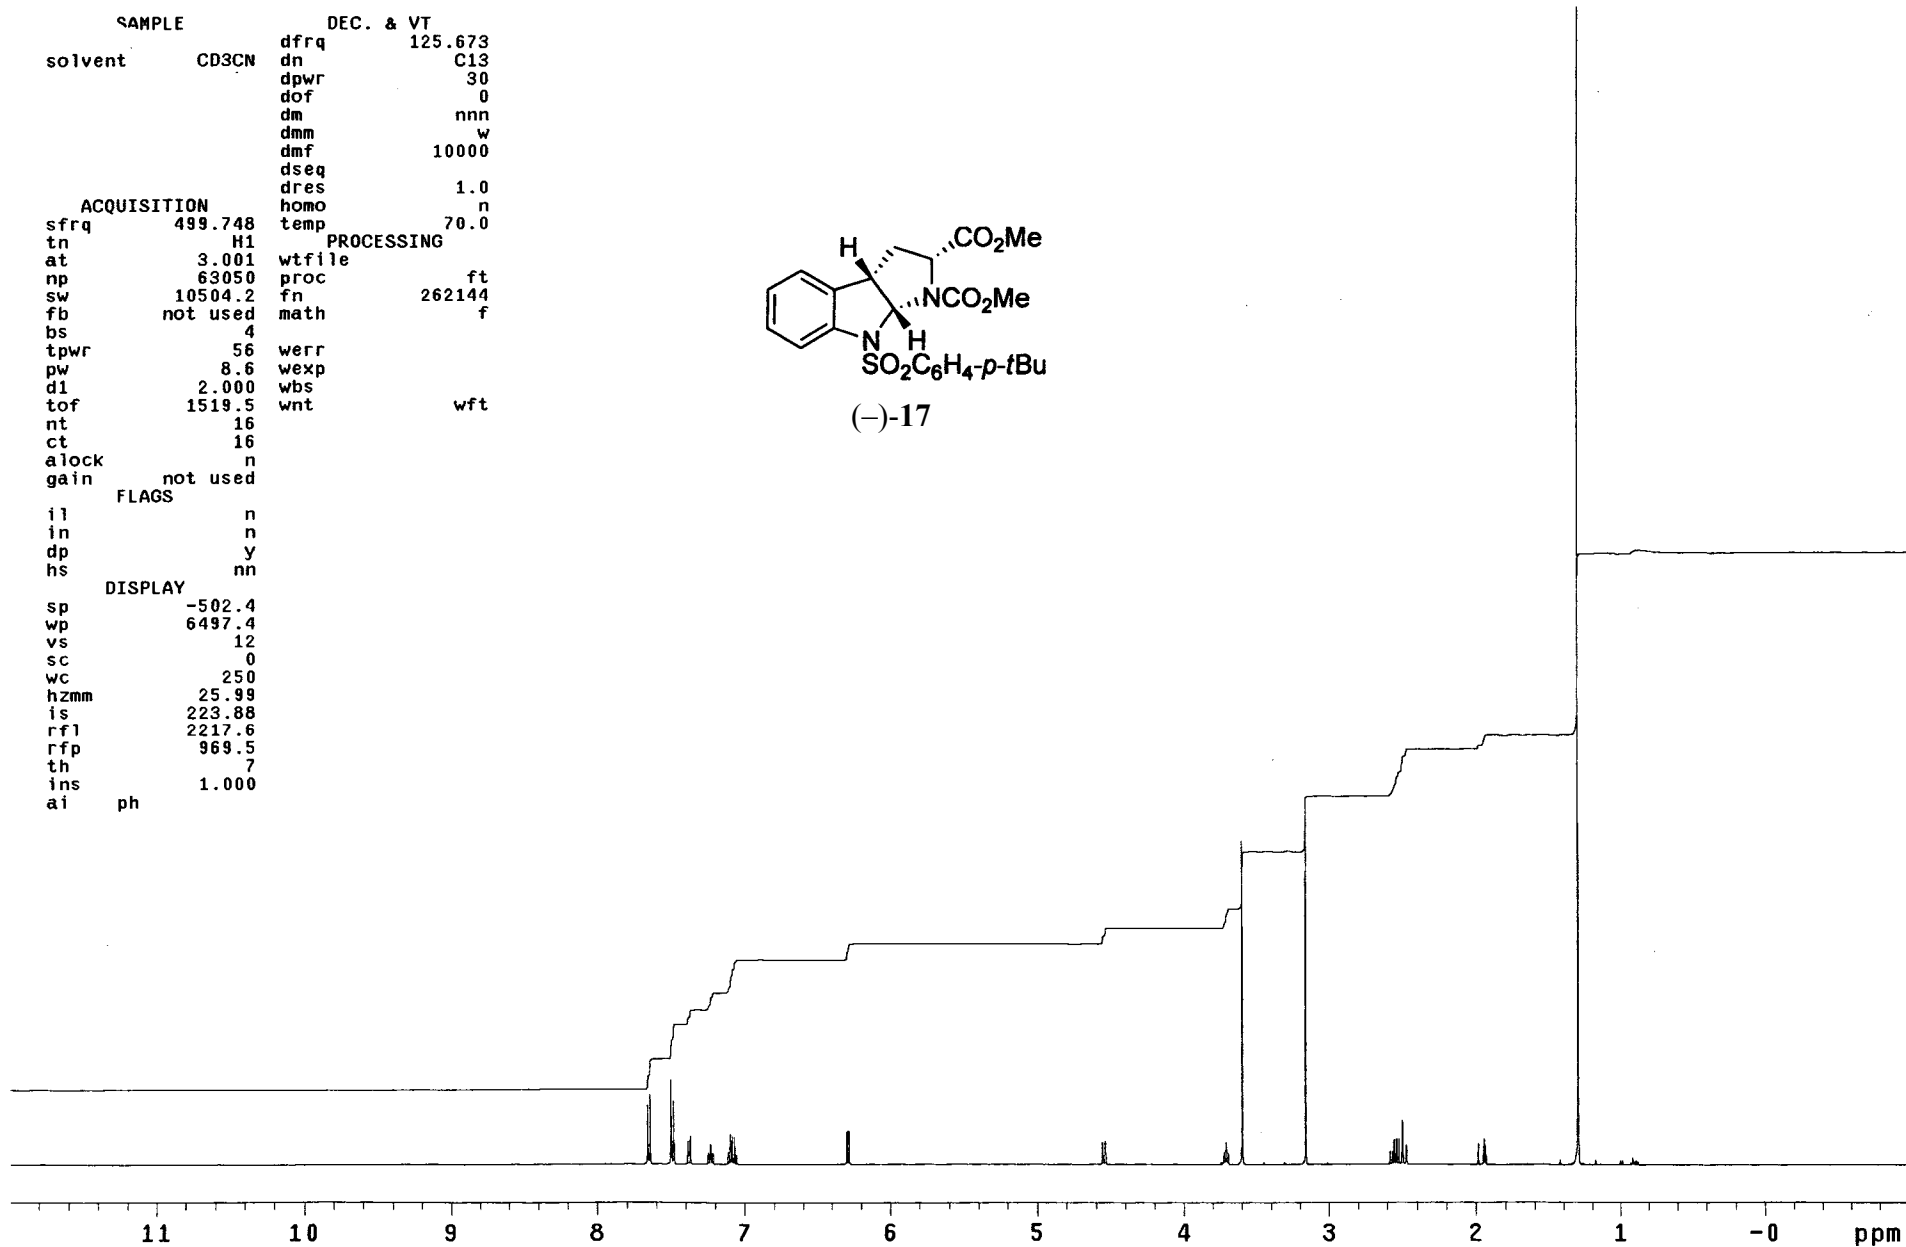

S92/S153

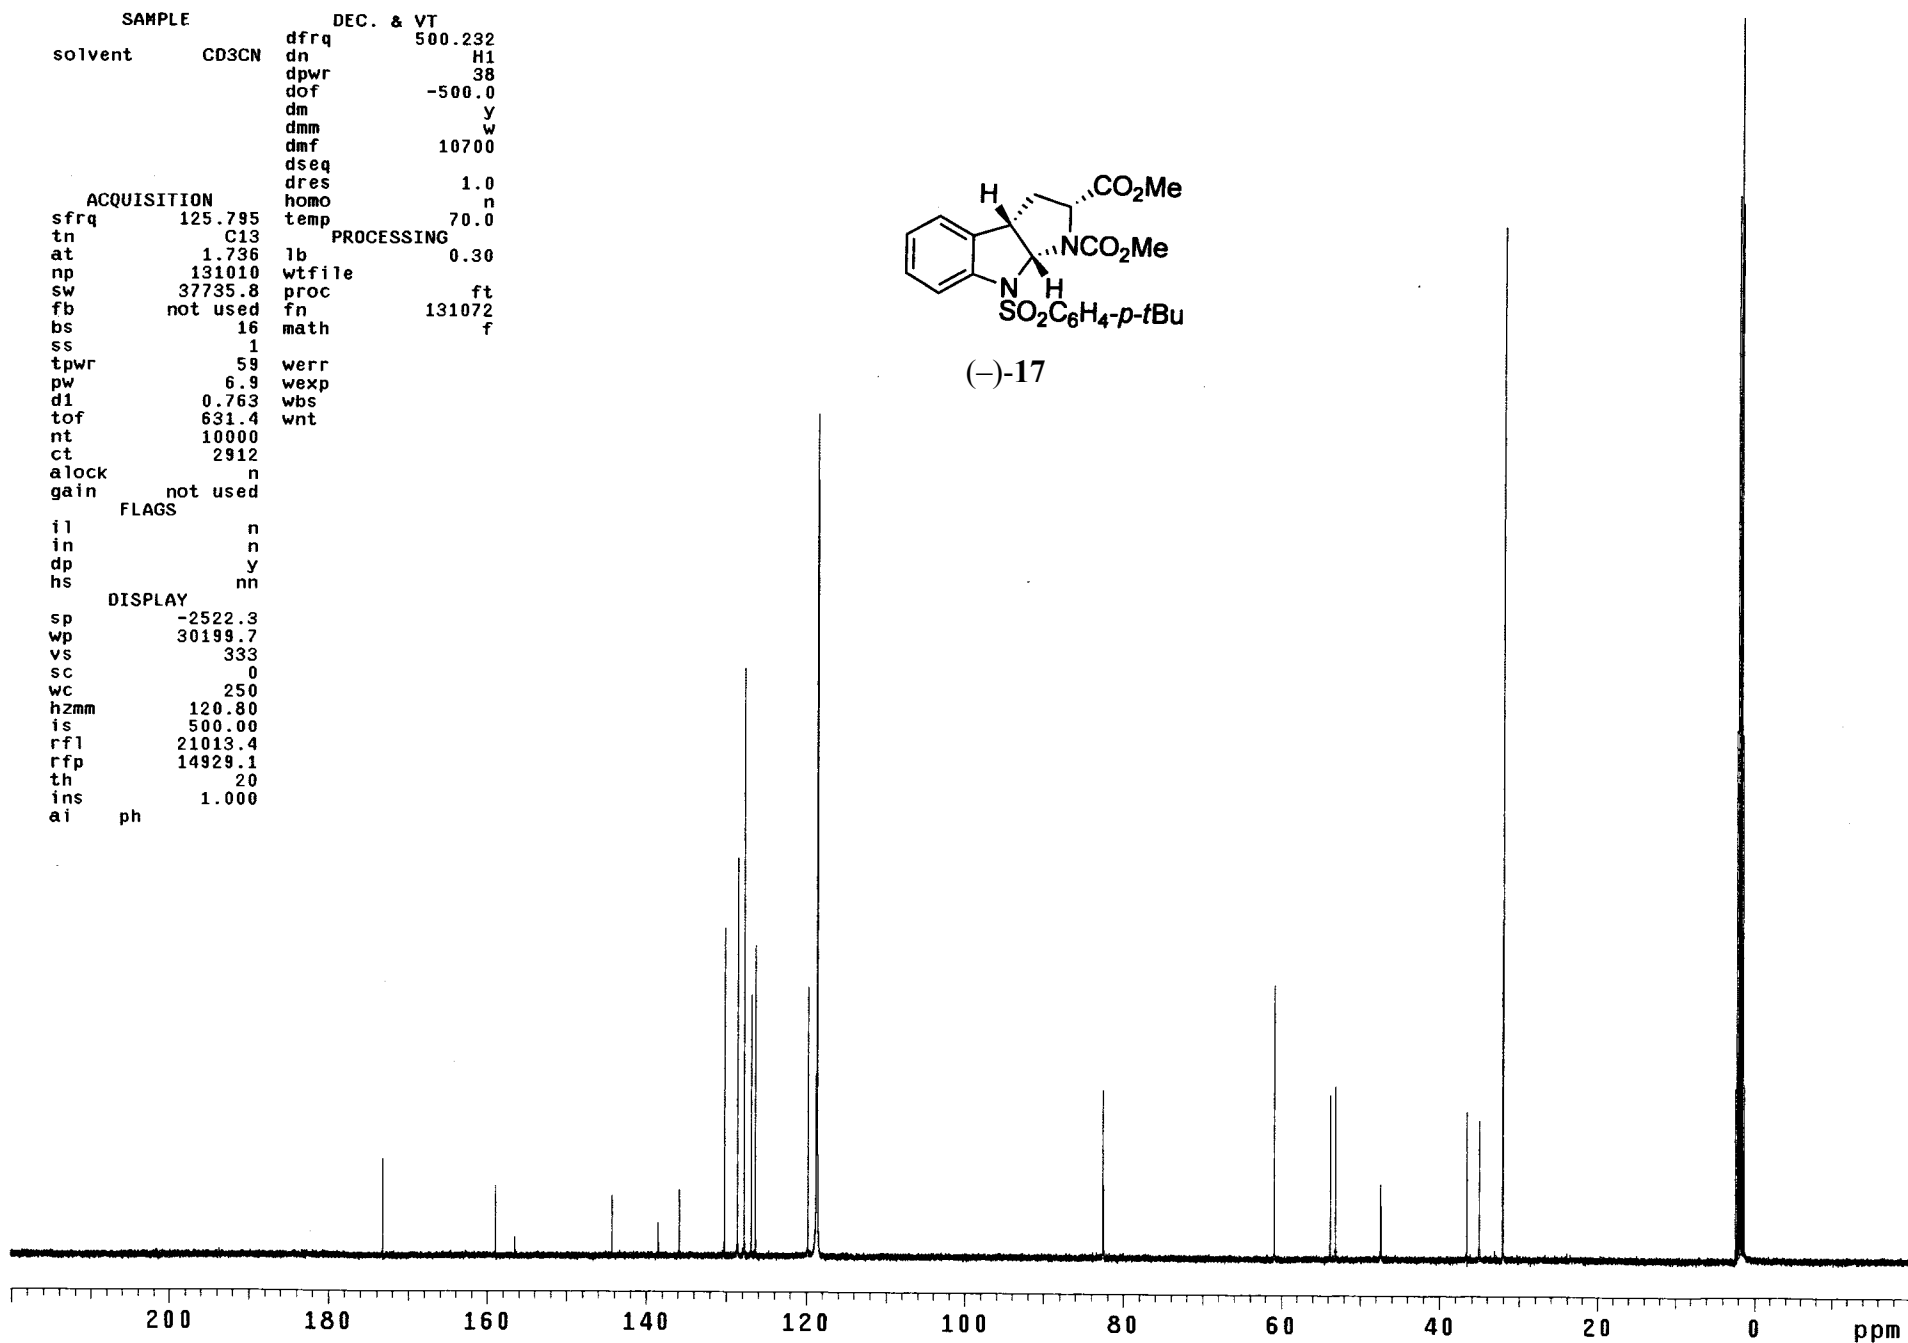

| SAMPLE      |          | DEC. & VT  |         |
|-------------|----------|------------|---------|
| solvent     | CD3CN    | dfrq       | 125.673 |
|             |          | dn         | C13     |
|             |          | dpwr       | 30      |
|             |          | dof        | 0       |
|             |          | dm         | nnn     |
|             |          | dmm        | w       |
|             |          | dmf        | 10000   |
|             |          | dseq       |         |
|             |          | dres       | 1.0     |
|             |          | homo       | n       |
|             |          | temp       | 70.0    |
| ACQUISITION |          | PROCESSING |         |
| sfrq        | 499.748  | wtfile     | ft      |
| tn          | H1       | proc       | 262144  |
| at          | 3.001    | fn         | f       |
| np          | 63050    | math       |         |
| sw          | 10504.2  |            |         |
| fb          | not used |            |         |
| bs          | 4        |            |         |
| tpwr        | 56       | werr       |         |
| pw          | 8.6      | wexp       |         |
| d1          | 2.000    | wbs        |         |
| tof         | 1519.5   | wnt        | wft     |
| nt          | 16       |            |         |
| ct          | 16       |            |         |
| alock       | n        |            |         |
| gain        | not used |            |         |
| FLAGS       |          |            |         |
| il          | n        |            |         |
| in          | n        |            |         |
| dp          | y        |            |         |
| hs          | nn       |            |         |
| DISPLAY     |          |            |         |
| sp          | -502.5   |            |         |
| wp          | 6497.4   |            |         |
| vs          | 10       |            |         |
| sc          | 0        |            |         |
| wc          | 250      |            |         |
| h2mm        | 25.99    |            |         |
| is          | 137.28   |            |         |
| rfl         | 2217.7   |            |         |
| rfp         | 969.5    |            |         |
| th          | 7        |            |         |
| ins         | 1.000    |            |         |
| ai          | ph       |            |         |

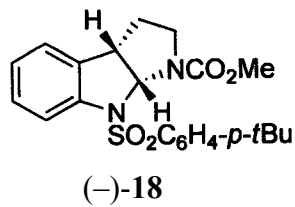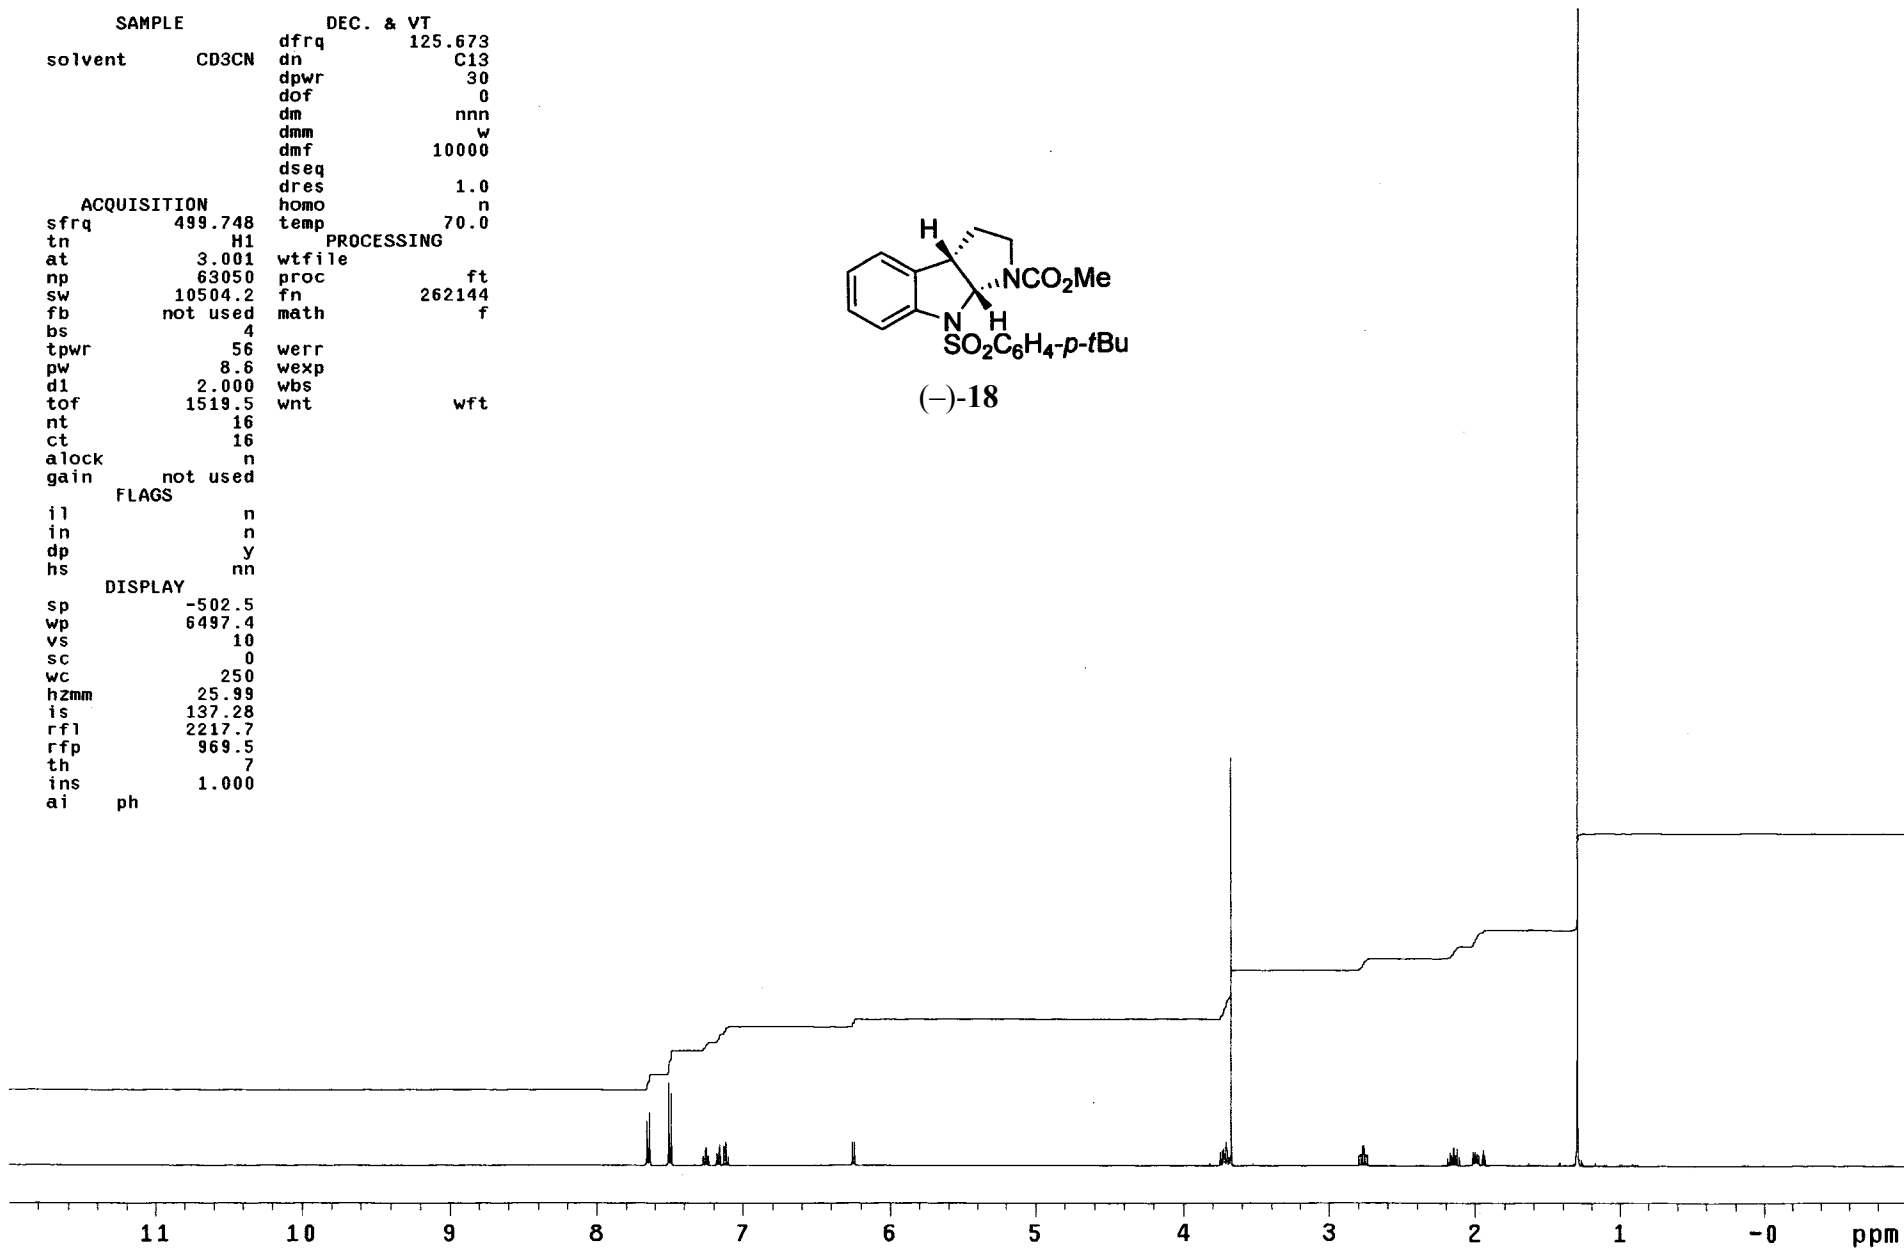

S94/S153

```

SAMPLE          DEC. & VT
solvent          CD3CN    dfrq      500.232
                   dn       H1
                   dpwr      38
                   dof     -500.0
                   dm        y
                   dmm        w
                   dmf     10700
                   dseq
                   dres      1.0
                   homo      n
                   temp     70.0

ACQUISITION
sfrq      125.795
tn         C13
at         1.736
np      131010
sw      37735.8
fb      not used
bs         16
ss         1
tpwr       59
pw         6.9
d1         0.763
tof        631.4
nt      10000
ct      1856
alock      n
gain      not used

FLAGS
il         n
in         n
dp         y
hs         nn

DISPLAY
sp      -2553.4
wp      30264.2
vs       126
sc        0
wc       250
hzmm     121.06
is       500.00
rfl     21012.2
rfp     14929.1
th        20
ins      1.000
ai      ph
  
```

PROCESSING

```

lb       0.30
wtfile
proc      ft
fn      131072
math      f
  
```

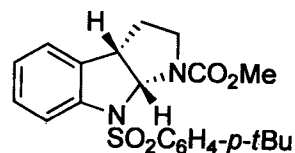

(-)-18

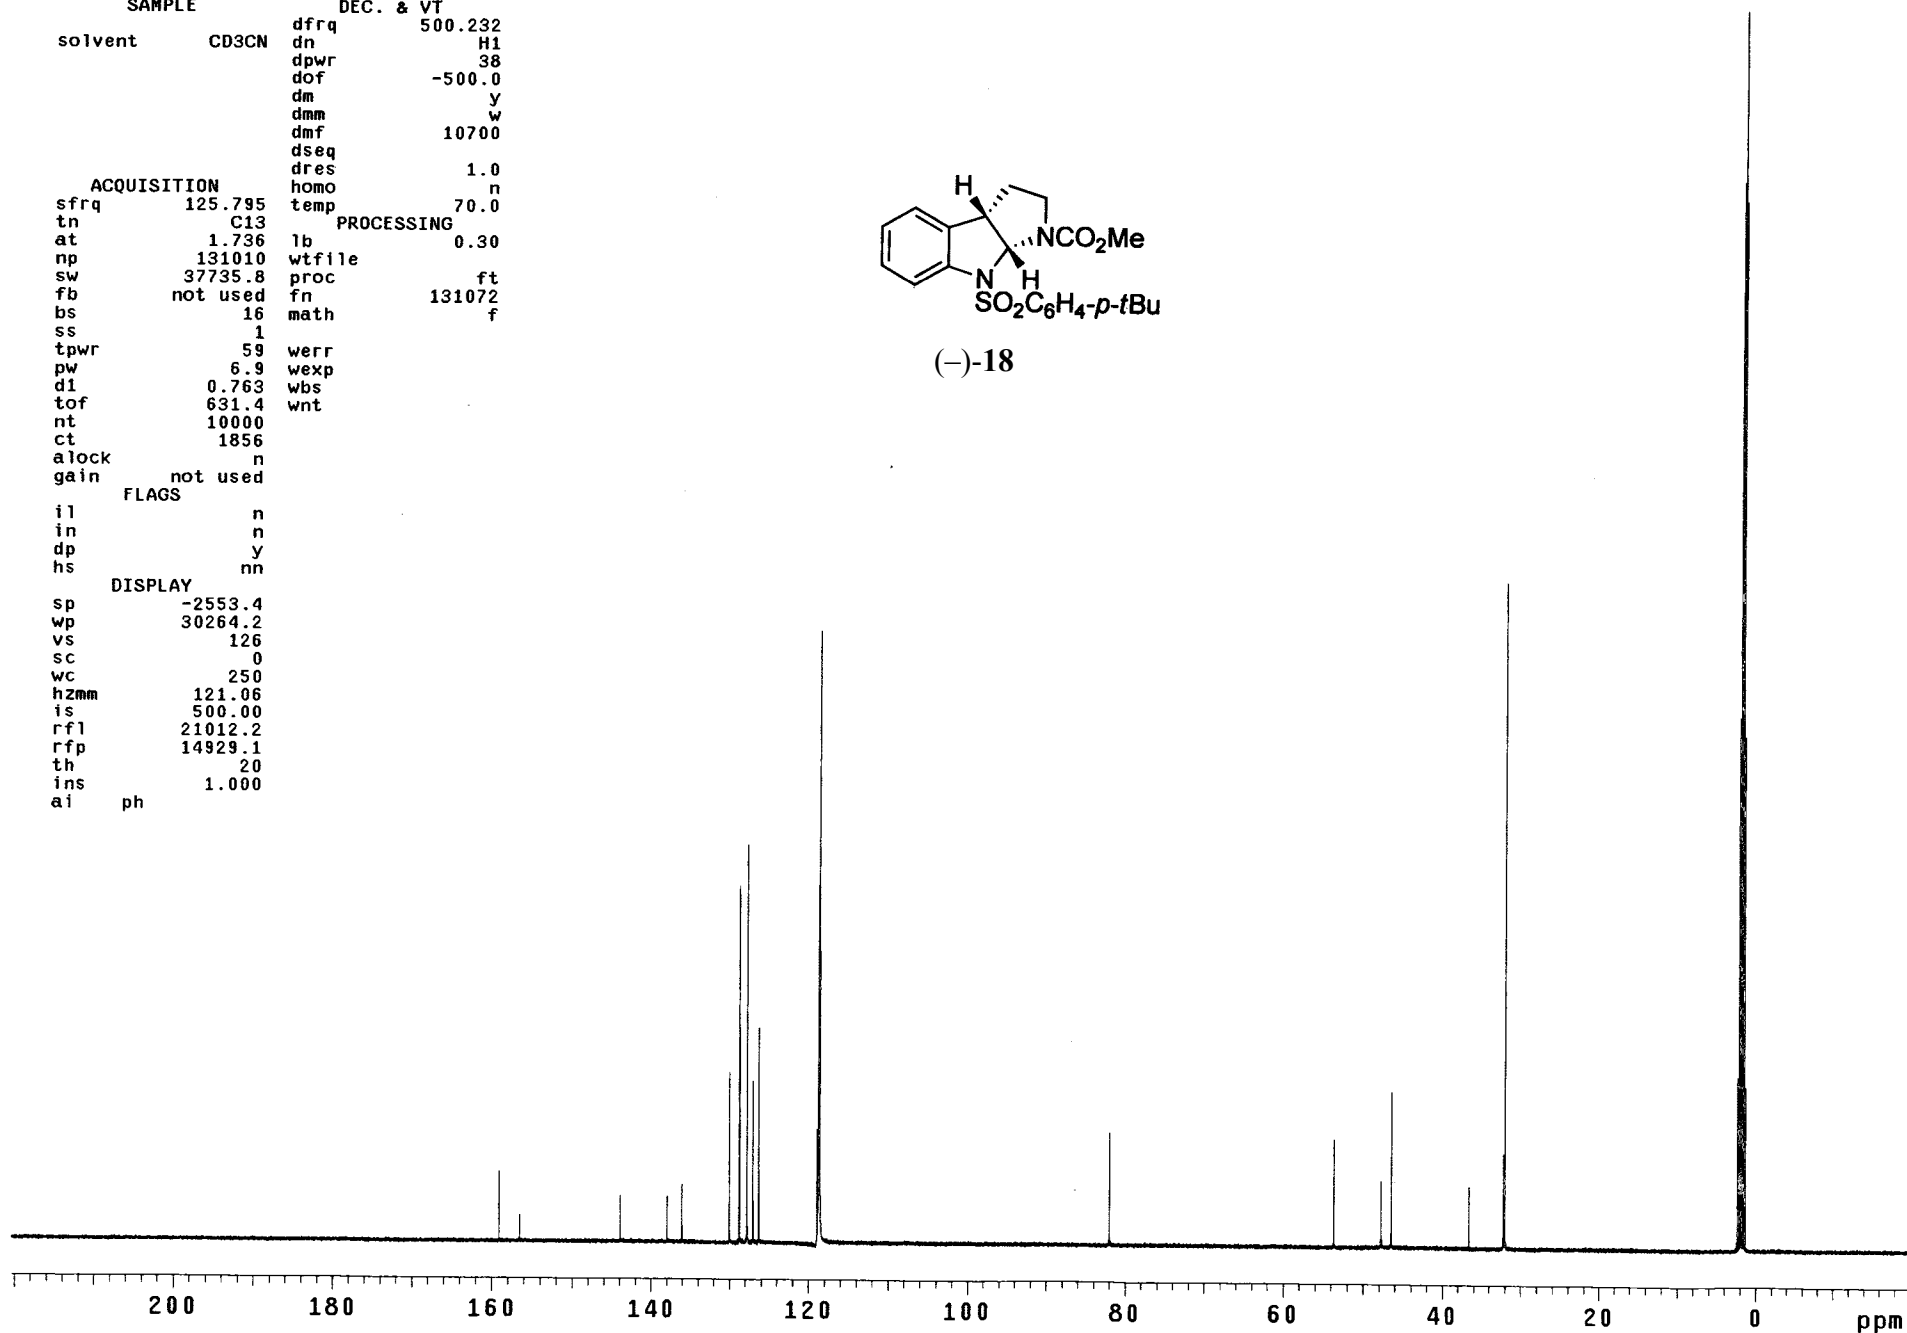

S95/S153

| SAMPLE      |          | DEC. & VT  |         |
|-------------|----------|------------|---------|
| solvent     | CDC13    | dfrq       | 125.672 |
|             |          | dn         | C13     |
|             |          | dpwr       | 30      |
|             |          | dof        | 0       |
|             |          | dm         | nnn     |
|             |          | dmm        | w       |
|             |          | dmf        | 10000   |
|             |          | dseq       |         |
|             |          | dres       | 1.0     |
|             |          | homo       | n       |
| ACQUISITION |          | PROCESSING |         |
| sfrq        | 499.746  | wtfile     |         |
| tn          | H1       | proc       | ft      |
| at          | 3.001    | fn         | 262144  |
| np          | 63050    | math       | f       |
| sw          | 10504.2  |            |         |
| fb          | not used |            |         |
| bs          | 4        | werr       |         |
| tpwr        | 56       | wexp       |         |
| pw          | 8.6      | wbs        |         |
| d1          | 2.000    | wnt        | wft     |
| tof         | 1519.5   |            |         |
| nt          | 16       |            |         |
| ct          | 16       |            |         |
| alock       | n        |            |         |
| gain        | not used |            |         |
| FLAGS       |          |            |         |
| il          | n        |            |         |
| in          | n        |            |         |
| dp          | y        |            |         |
| hs          | nn       |            |         |
| DISPLAY     |          |            |         |
| sp          | -508.0   |            |         |
| wp          | 6494.3   |            |         |
| vs          | 17       |            |         |
| sc          | 0        |            |         |
| wc          | 250      |            |         |
| hzmm        | 25.98    |            |         |
| is          | 268.59   |            |         |
| rfl         | 4866.0   |            |         |
| rfp         | 3618.1   |            |         |
| th          | 7        |            |         |
| ins         | 100.000  |            |         |
| ai          | ph       |            |         |

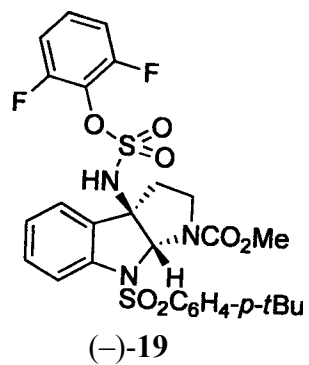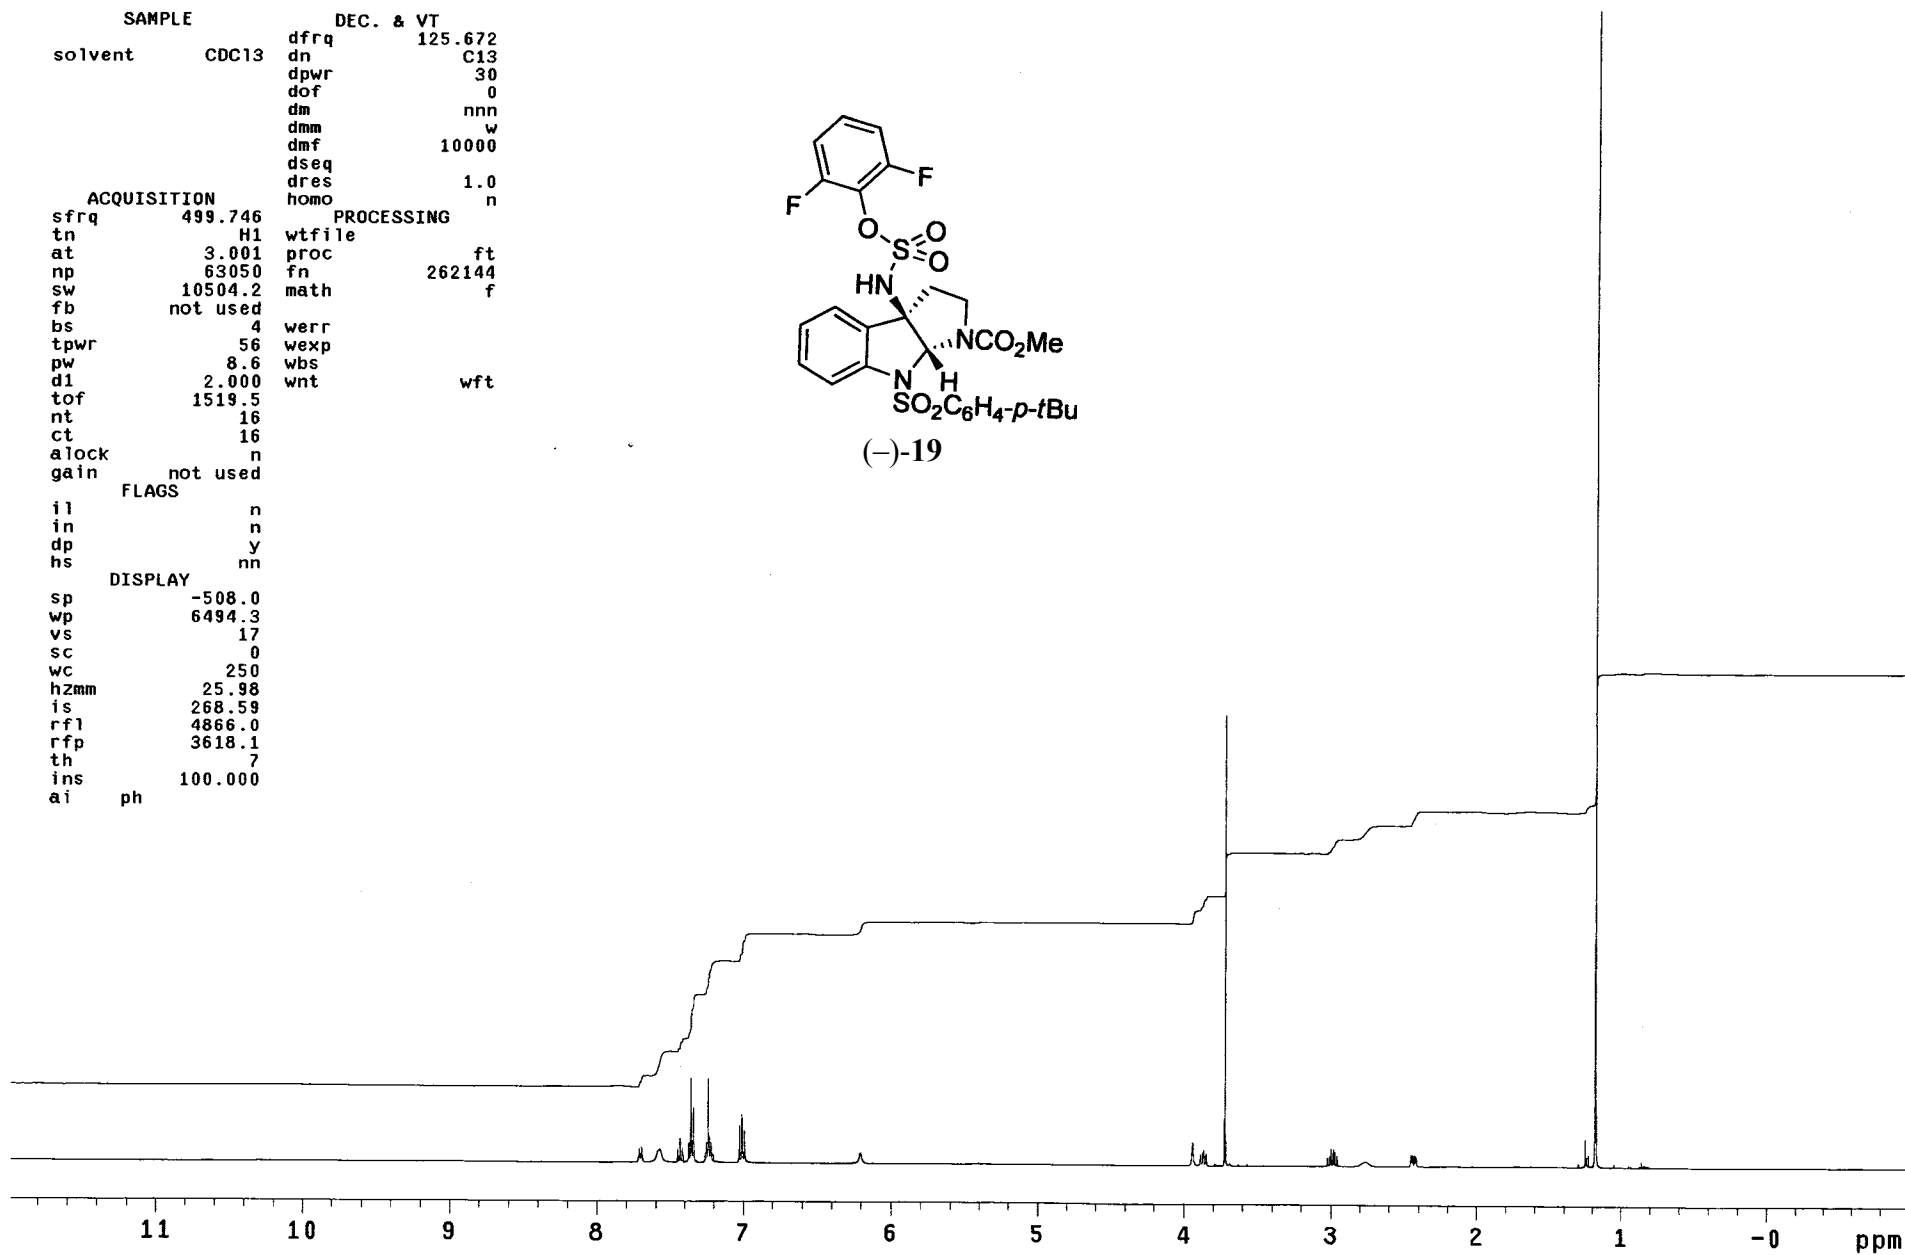

S96/S153

|             |          |            |         |
|-------------|----------|------------|---------|
| SAMPLE      |          | DEC. & VT  |         |
| solvent     | CDC13    | dfrq       | 500.229 |
|             |          | dn         | H1      |
|             |          | dpwr       | 38      |
|             |          | dof        | -500.0  |
|             |          | dm         | y       |
|             |          | dmm        | w       |
|             |          | dmf        | 10700   |
|             |          | dseq       |         |
|             |          | dres       | 1.0     |
|             |          | homo       | n       |
| ACQUISITION |          | PROCESSING |         |
| sfrq        | 125.795  | lb         | 0.30    |
| tn          | C13      | wtfile     |         |
| at          | 1.736    | proc       | ft      |
| np          | 131010   | fn         | 131072  |
| sw          | 37735.8  | math       | f       |
| fb          | not used |            |         |
| bs          | 16       |            |         |
| ss          | 1        | werr       |         |
| tpwr        | 59       | wexp       |         |
| pw          | 6.9      | wbs        |         |
| d1          | 0.763    | wnt        |         |
| tof         | 631.4    |            |         |
| nt          | 20000    |            |         |
| ct          | 6512     |            |         |
| alock       | n        |            |         |
| gain        | not used |            |         |
| FLAGS       |          |            |         |
| il          | n        |            |         |
| in          | n        |            |         |
| dp          | y        |            |         |
| hs          | nn       |            |         |
| DISPLAY     |          |            |         |
| sp          | -2549.9  |            |         |
| wp          | 30220.5  |            |         |
| vs          | 222      |            |         |
| sc          | 0        |            |         |
| wc          | 250      |            |         |
| hzmm        | 120.88   |            |         |
| is          | 500.00   |            |         |
| rfl         | 16005.0  |            |         |
| rfp         | 9714.2   |            |         |
| th          | 20       |            |         |
| ins         | 1.000    |            |         |
| ai          | ph       |            |         |

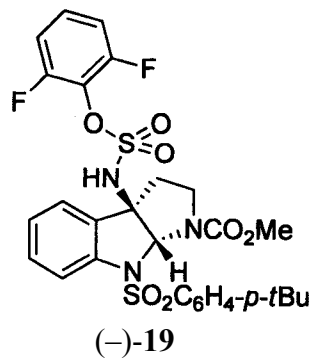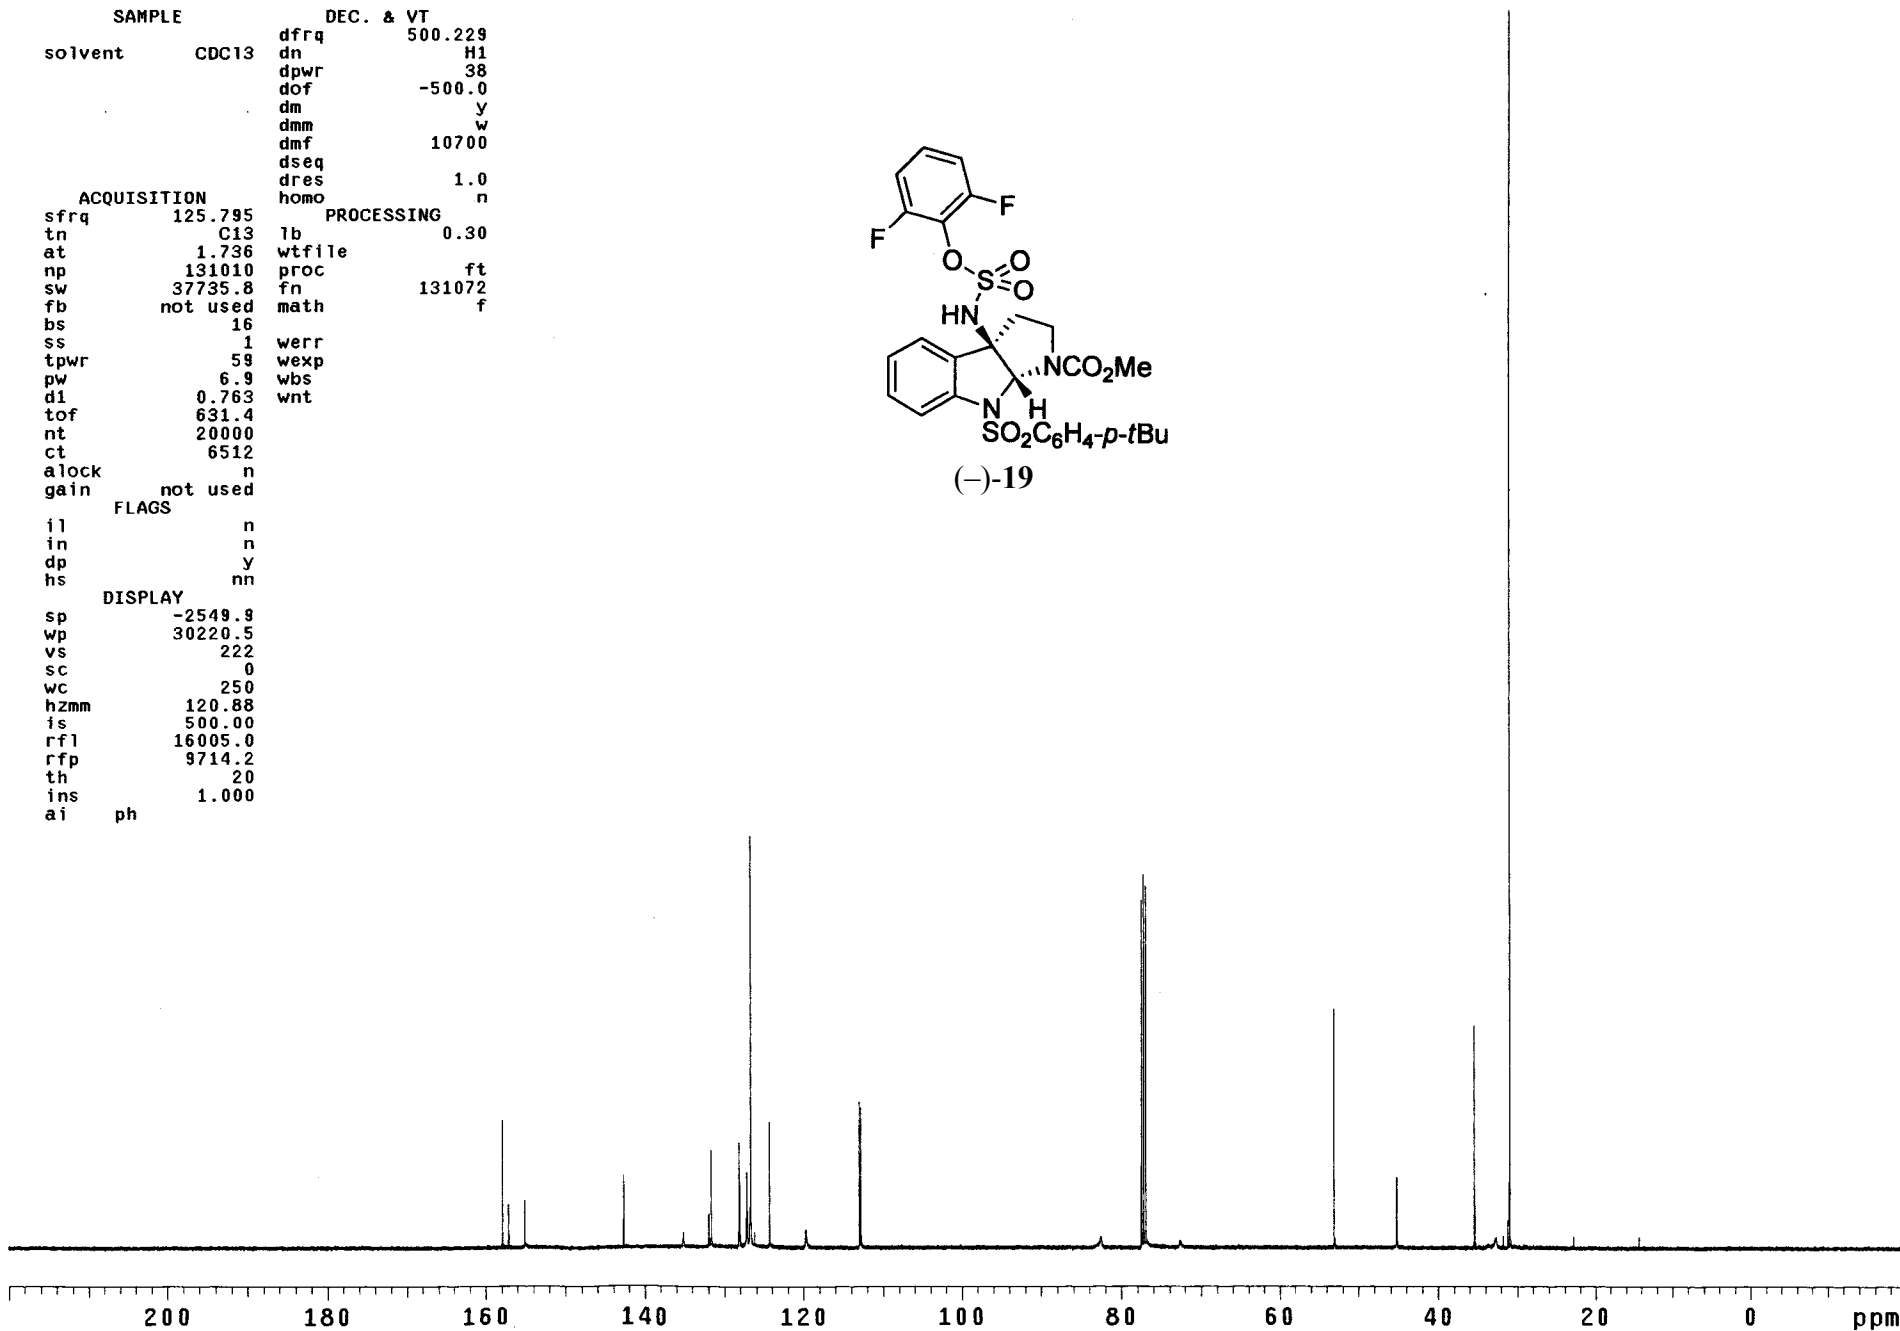



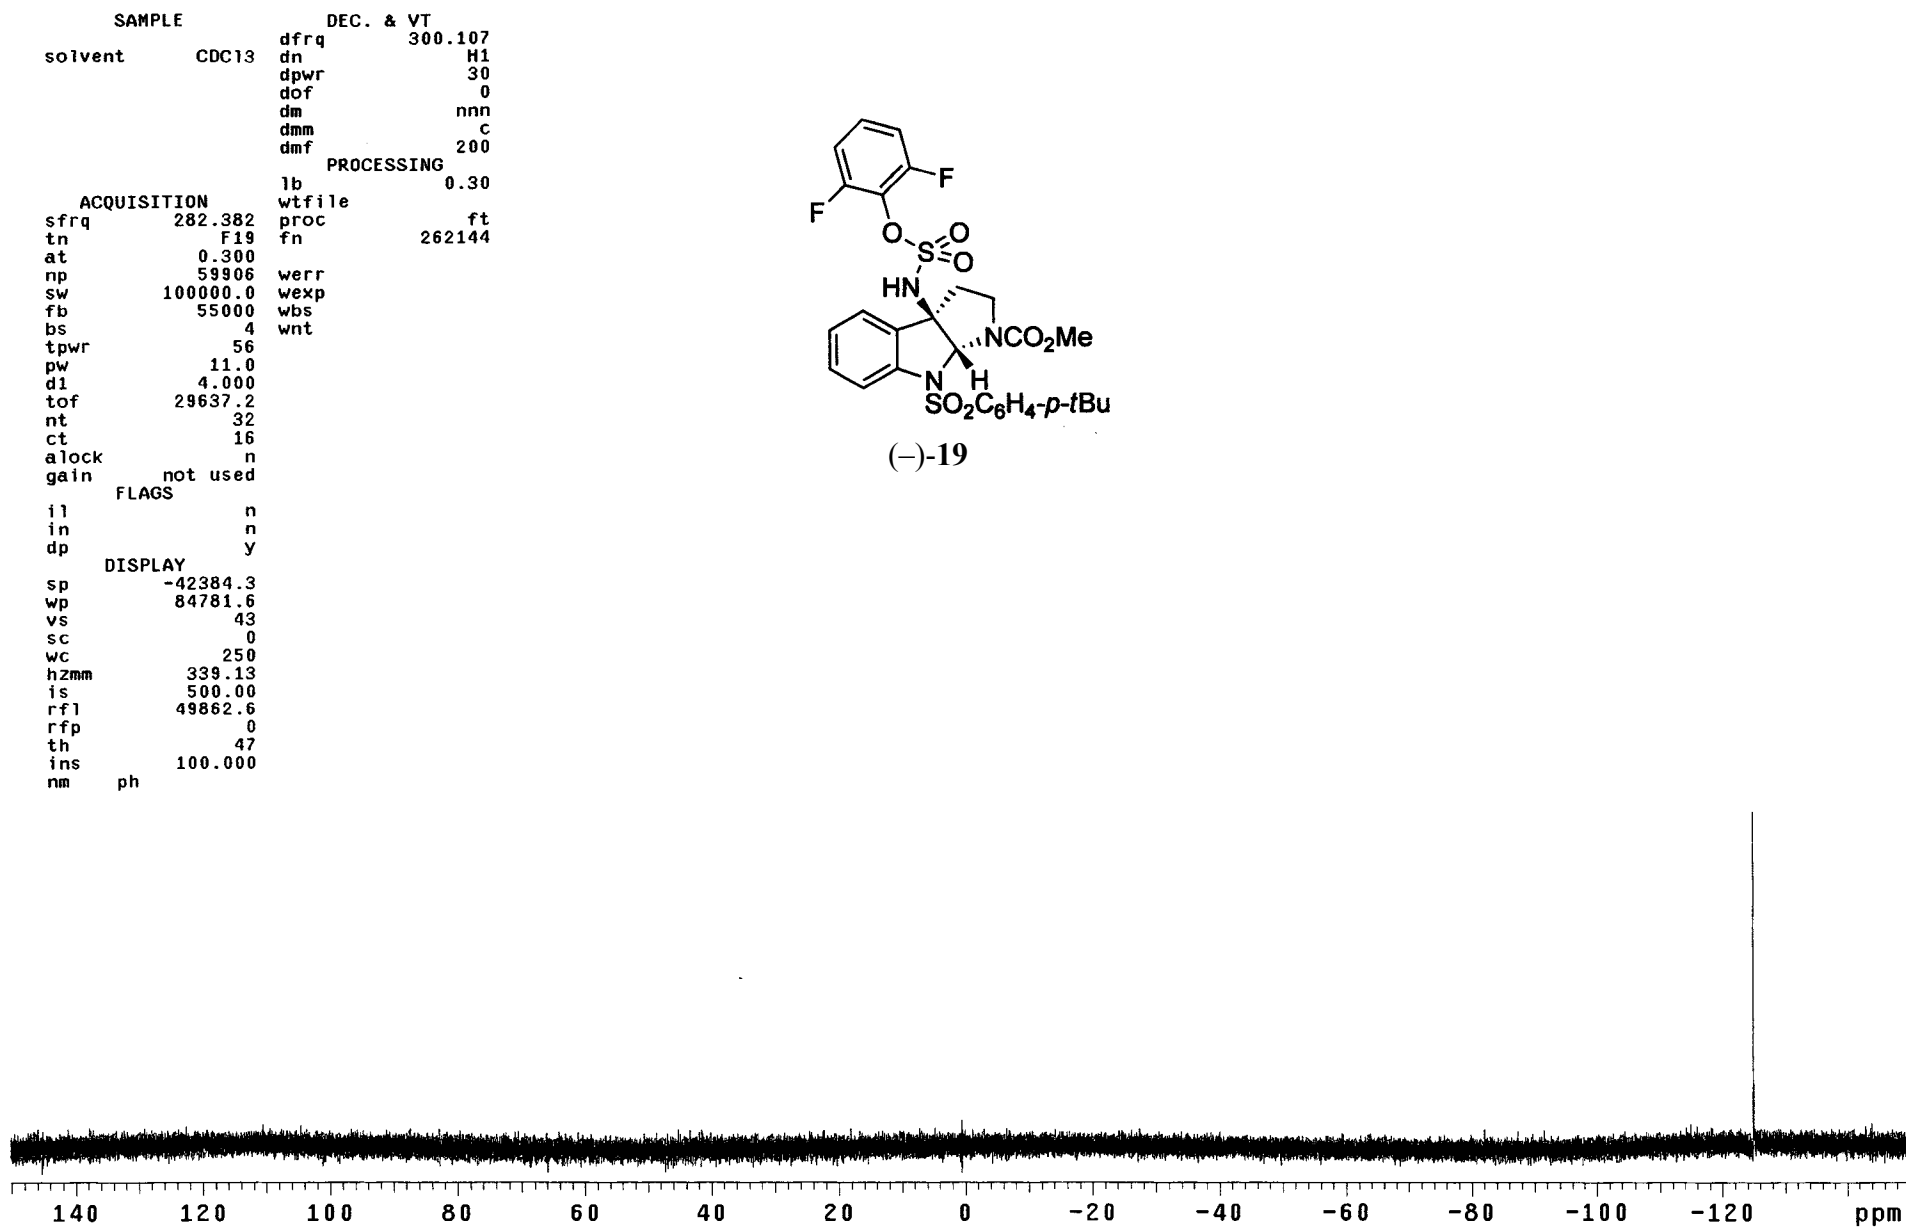

SAMPLE DEC. & VT  
solvent CD3CN dfrq 125.673  
dn C13  
dpwr 30  
dof 0  
dm nnn  
dmm w  
dmf 10000  
dseq  
dres 1.0  
homo n  
temp 70.0  
ACQUISITION  
sfrq 499.748  
tn H1  
at 3.001  
np 63050  
sw 10504.2  
fb not used  
bs 4  
tpwr 56  
pw 8.6  
d1 2.000  
tof 1519.5  
nt 16  
ct 16  
alock n  
gain not used  
FLAGS  
il n  
in n  
dp y  
hs nn  
DISPLAY  
sp -509.2  
wp 6503.4  
vs 27  
sc 0  
wc 250  
hzmm 26.01  
is 115.71  
rf1 2218.5  
rfp 969.5  
th 7  
ins 100.000  
ai ph

PROCESSING  
wtfile  
proc ft  
fn 262144  
math f  
wnt wft

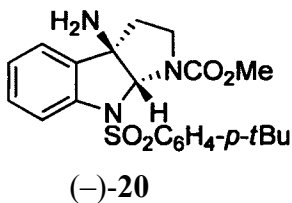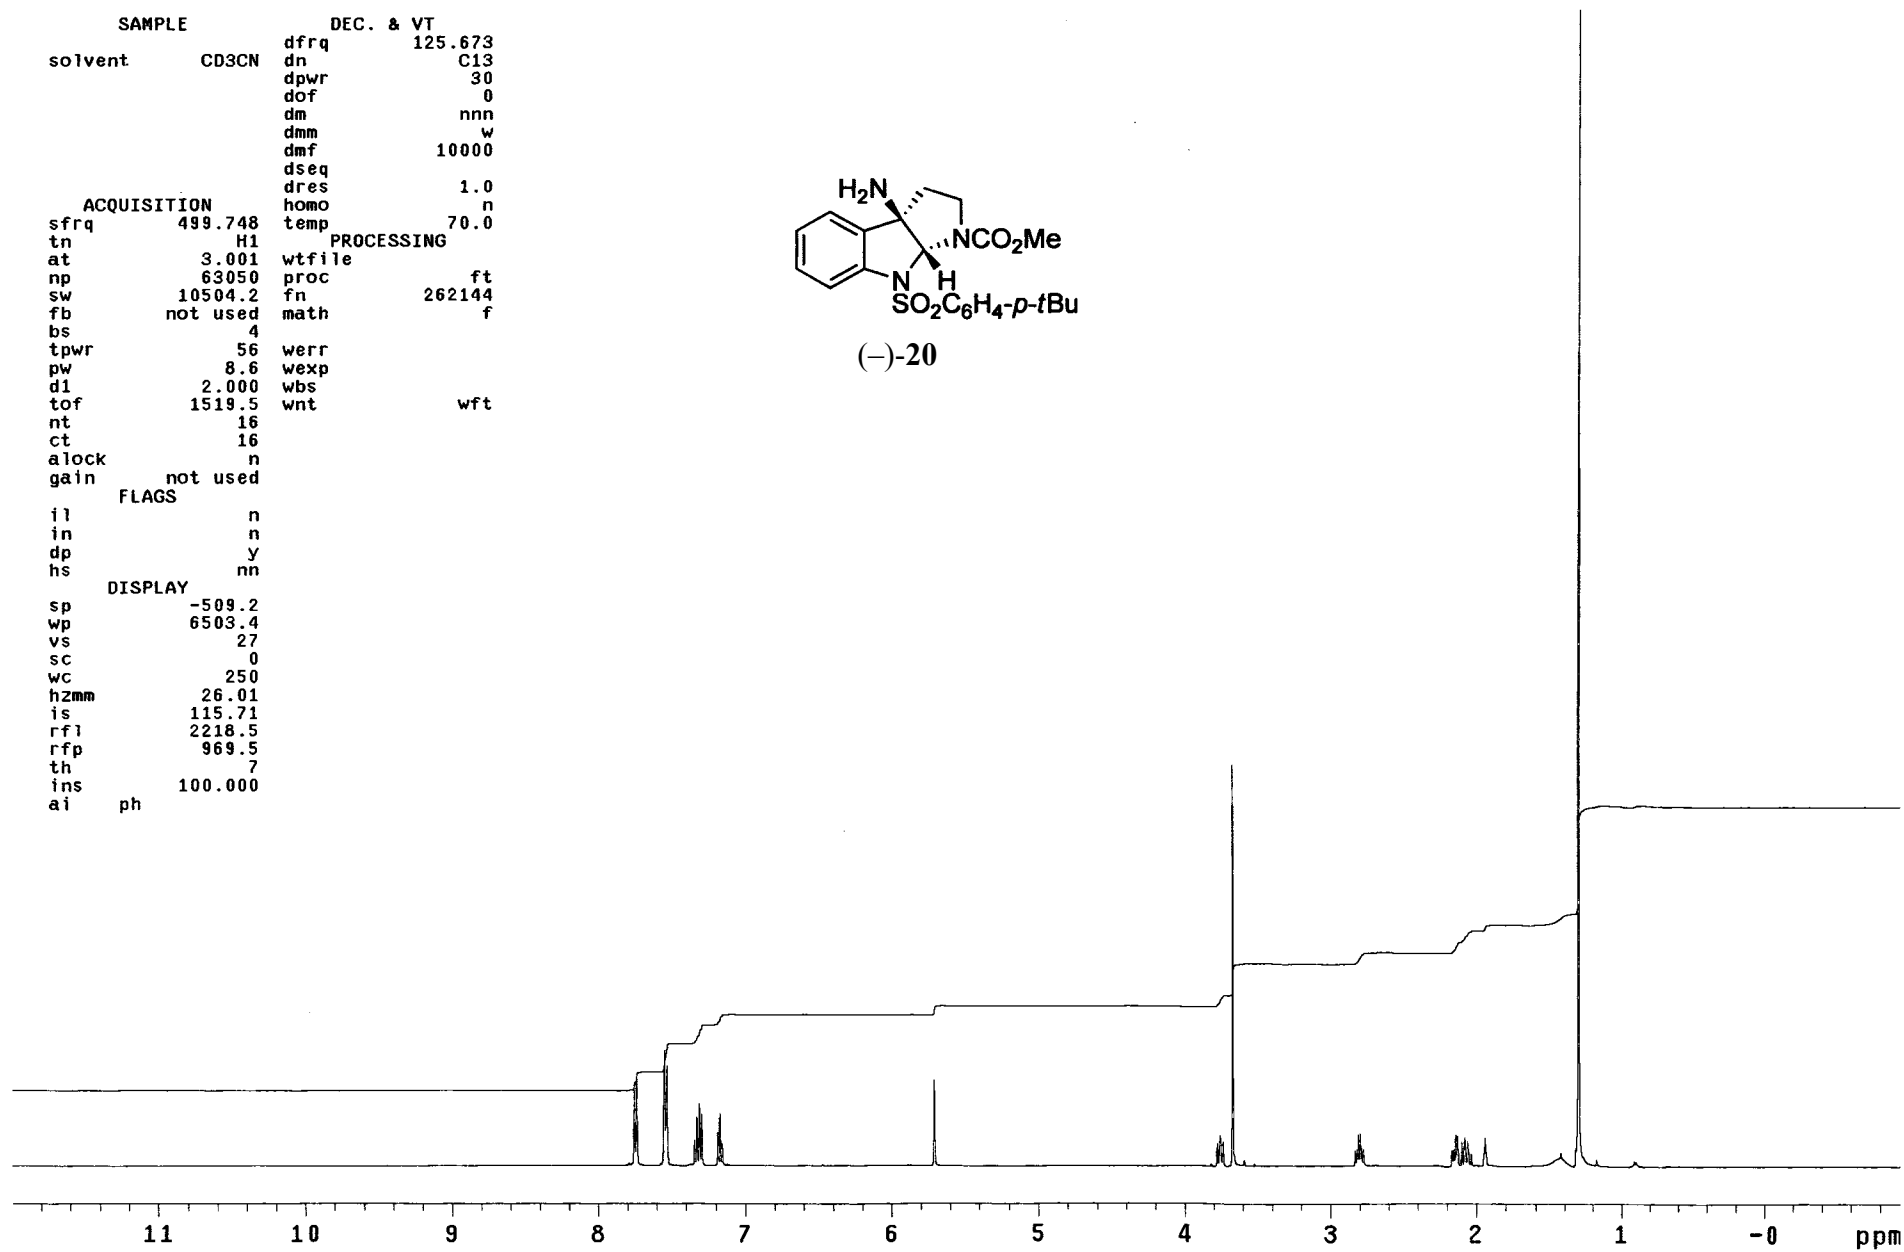

S99/S153

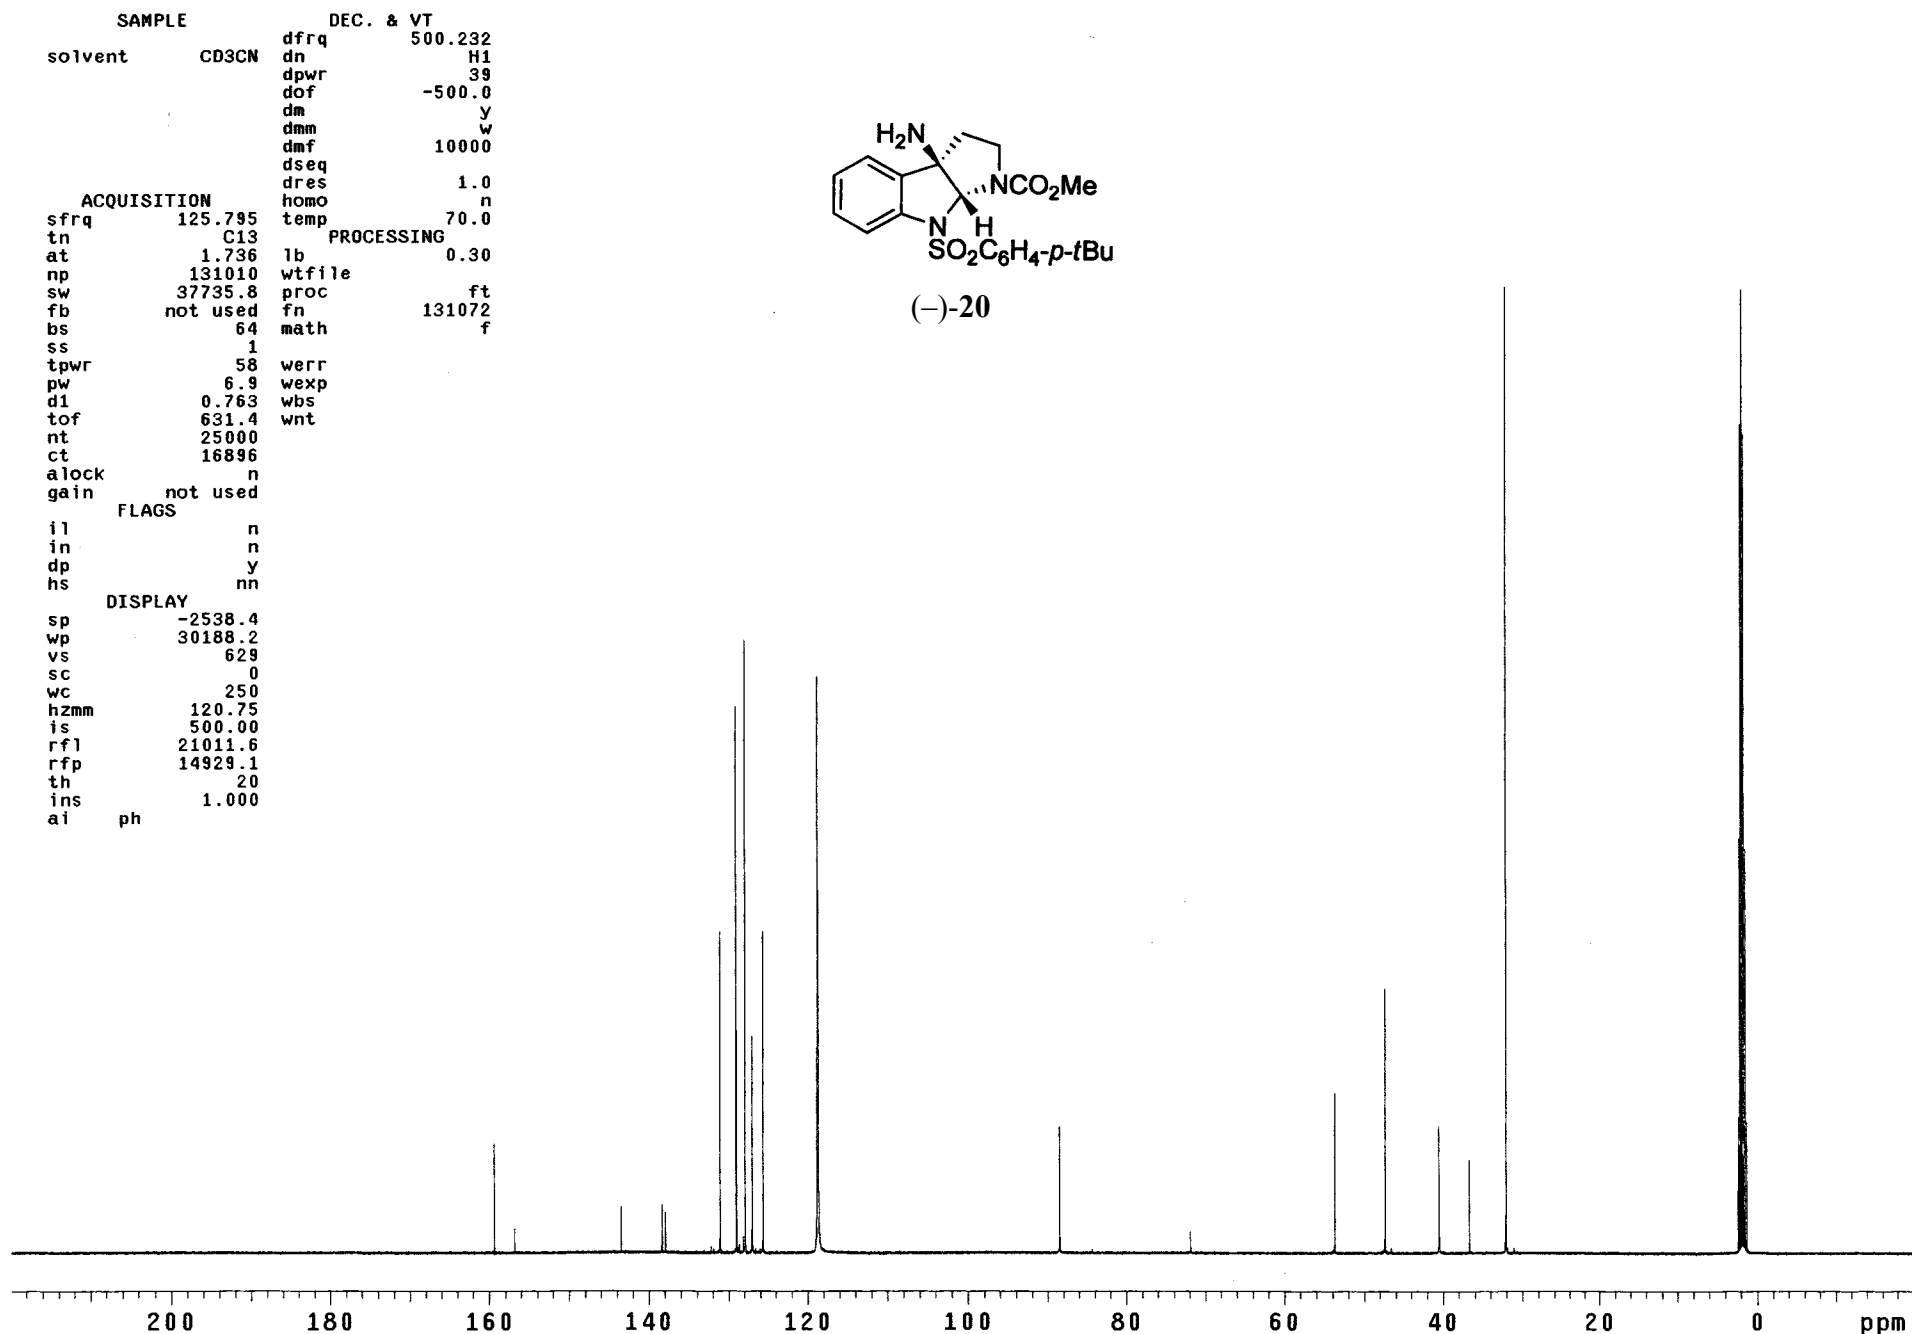

| SAMPLE      |          | DEC. & VT  |         |
|-------------|----------|------------|---------|
| solvent     | Benzene  | dfrq       | 125.672 |
|             |          | dn         | C13     |
|             |          | dpwr       | 30      |
|             |          | dof        | 0       |
|             |          | dm         | nnn     |
|             |          | dmm        | w       |
|             |          | dmf        | 10000   |
| ACQUISITION |          | dseq       |         |
| sfrq        | 499.746  | dres       | 1.0     |
| tn          | H1       | homo       | n       |
| at          | 3.001    | PROCESSING |         |
| np          | 63050    | wtfile     |         |
| sw          | 10504.2  | proc       | ft      |
| fb          | not used | fn         | 262144  |
| bs          | 4        | math       | f       |
| tpwr        | 56       |            |         |
| pw          | 8.6      | werr       |         |
| d1          | 2.000    | wexp       |         |
| tof         | 1519.5   | wbs        |         |
| nt          | 16       | wnt        | wft     |
| ct          | 16       |            |         |
| alock       | n        |            |         |
| gain        | not used |            |         |
| FLAGS       |          |            |         |
| il          | n        |            |         |
| in          | n        |            |         |
| dp          | y        |            |         |
| hs          | nn       |            |         |
| DISPLAY     |          |            |         |
| sp          | -501.3   |            |         |
| wp          | 6501.7   |            |         |
| vs          | 17       |            |         |
| sc          | 0        |            |         |
| wc          | 250      |            |         |
| hzmm        | 26.01    |            |         |
| is          | 141.88   |            |         |
| rfl         | 4794.8   |            |         |
| rfp         | 3578.2   |            |         |
| th          | 7        |            |         |
| ins         | 100.000  |            |         |
| ai          | ph       |            |         |

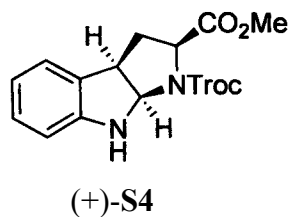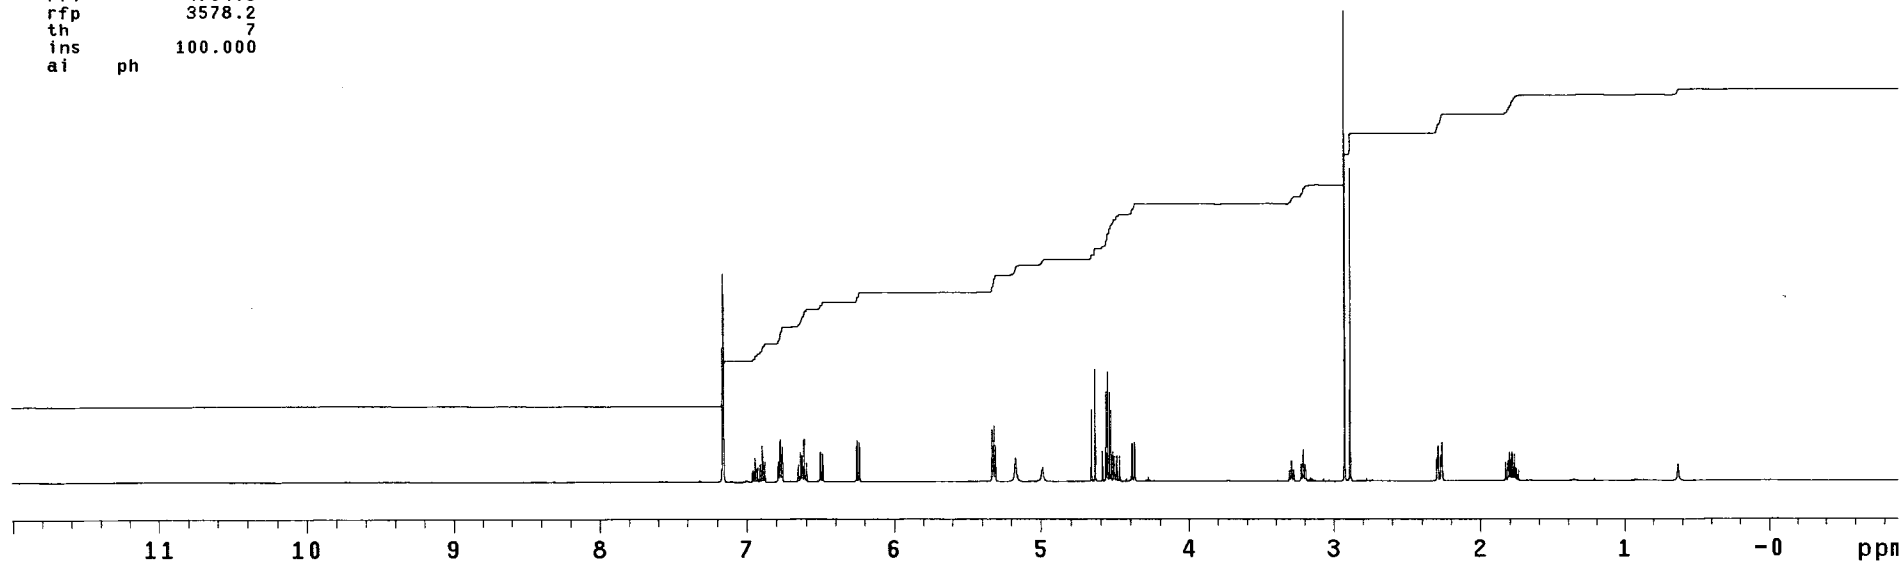

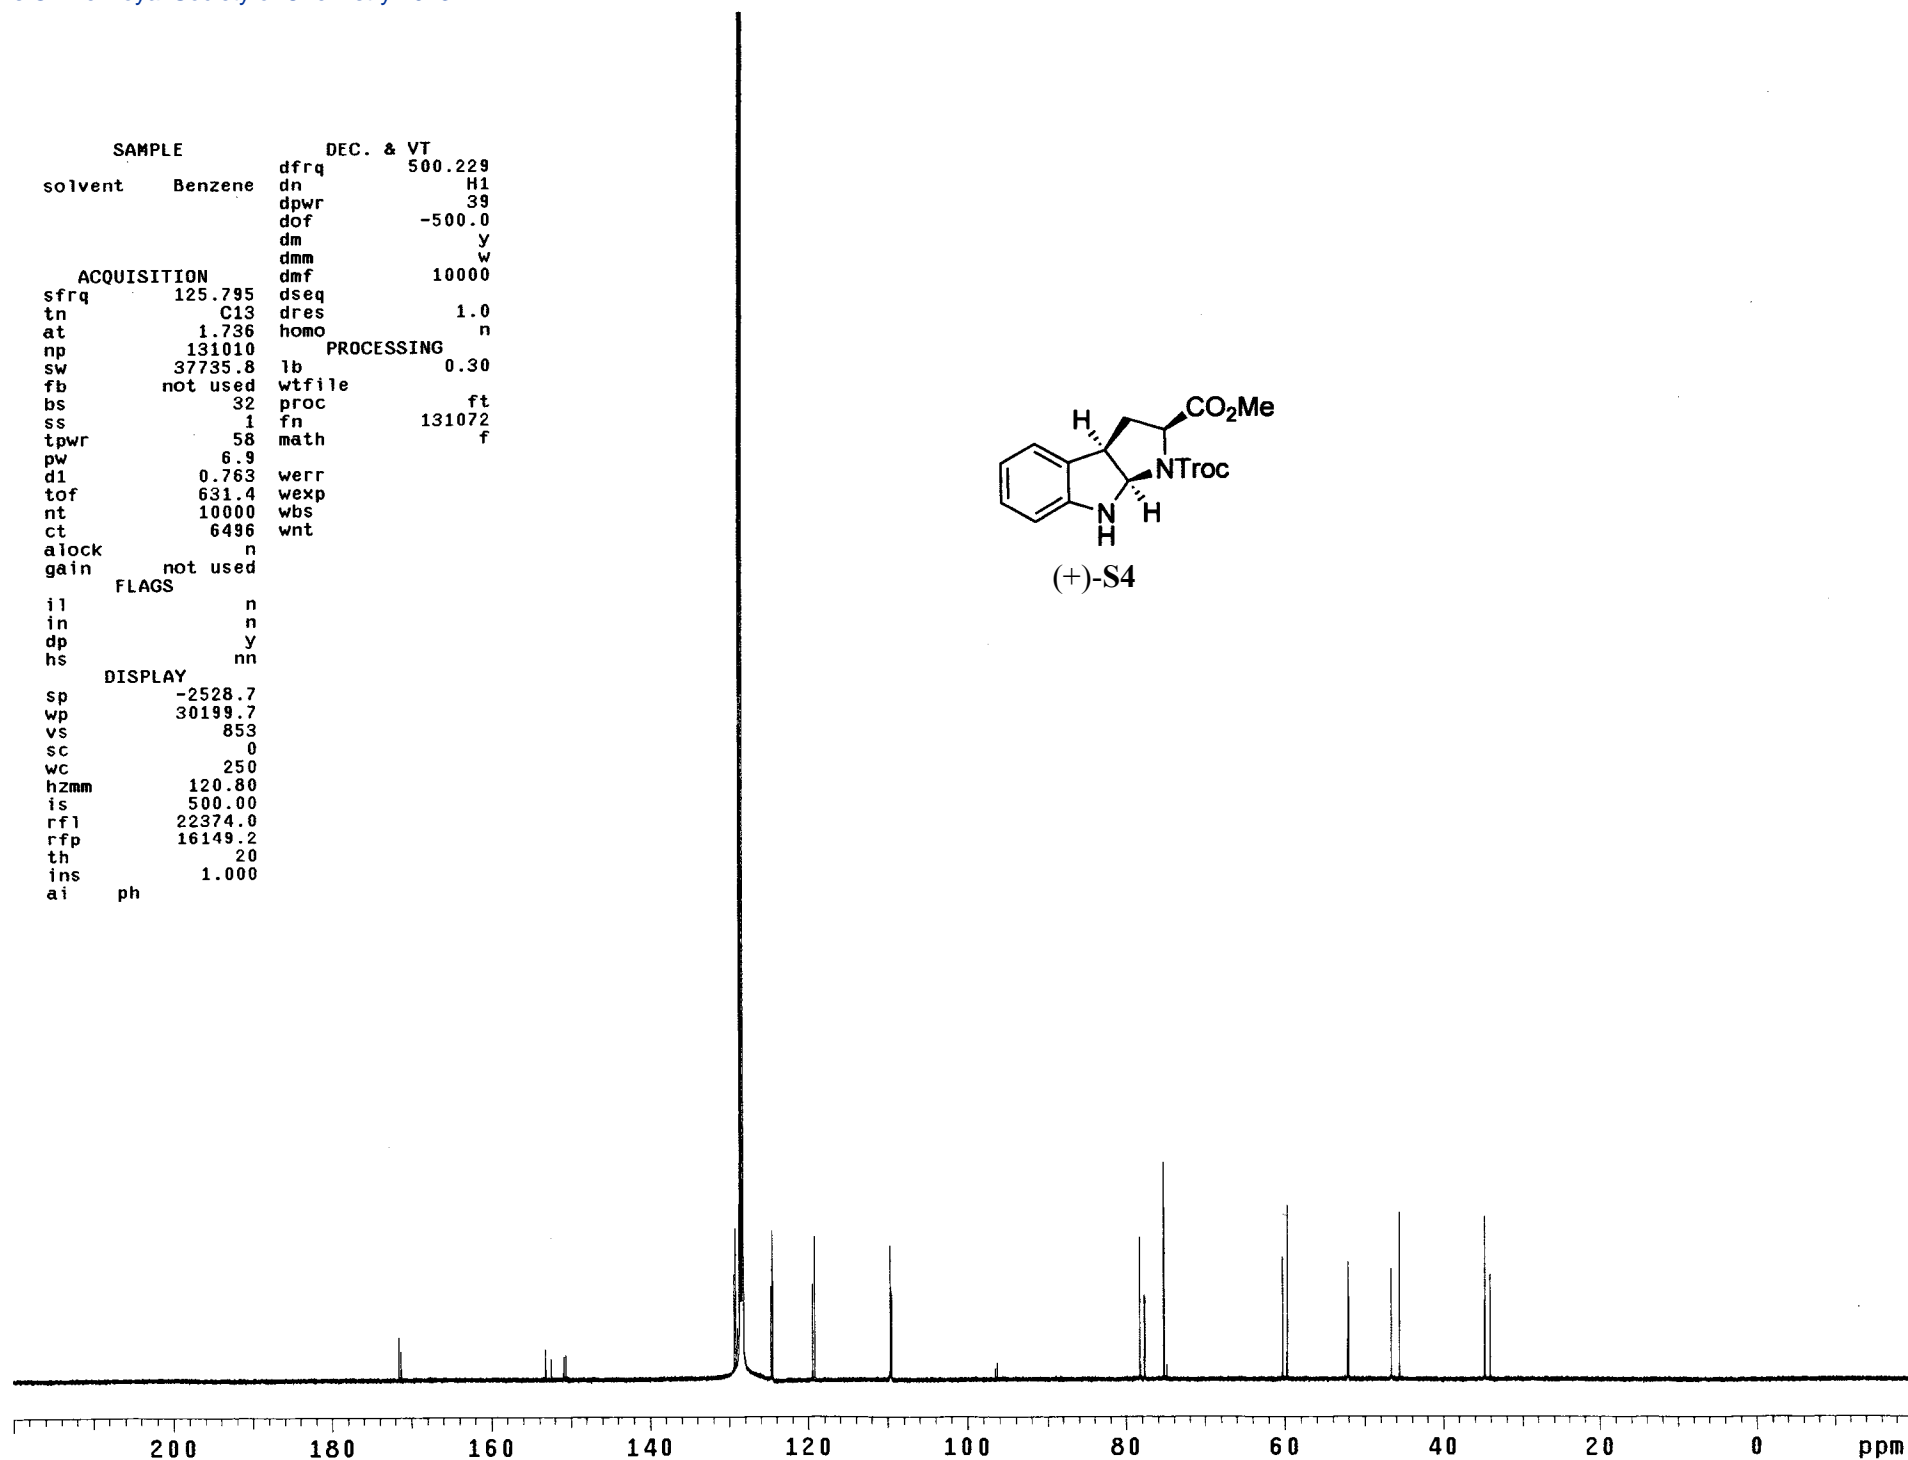

| SAMPLE      |          | DEC. & VT  |         |
|-------------|----------|------------|---------|
| solvent     | CD3CN    | dfrq       | 125.673 |
|             |          | dn         | C13     |
|             |          | dpwr       | 30      |
|             |          | dof        | 0       |
|             |          | dm         | nnn     |
|             |          | dmm        | w       |
|             |          | dmf        | 10000   |
|             |          | dseq       |         |
|             |          | dres       | 1.0     |
|             |          | homo       | n       |
|             |          | temp       | 70.0    |
| ACQUISITION |          | PROCESSING |         |
| sfrq        | 499.748  | wtfile     |         |
| tn          | H1       | proc       | ft      |
| at          | 3.001    | fn         | 262144  |
| np          | 63050    | math       | f       |
| sw          | 10504.2  |            |         |
| fb          | not used |            |         |
| bs          | 4        |            |         |
| tpwr        | 56       | werr       |         |
| pw          | 8.6      | wexp       |         |
| d1          | 2.000    | wbs        |         |
| tof         | 1519.5   | wnt        | wft     |
| nt          | 32       |            |         |
| ct          | 12       |            |         |
| alock       | n        |            |         |
| gain        | not used |            |         |
| FLAGS       |          |            |         |
| il          | n        |            |         |
| in          | n        |            |         |
| dp          | y        |            |         |
| hs          | nn       |            |         |
| DISPLAY     |          |            |         |
| sp          | -510.2   |            |         |
| wp          | 6497.4   |            |         |
| vs          | 63       |            |         |
| sc          | 0        |            |         |
| wc          | 250      |            |         |
| hzmm        | 25.99    |            |         |
| is          | 206.92   |            |         |
| rfl         | 2217.2   |            |         |
| rfp         | 969.5    |            |         |
| th          | 7        |            |         |
| ins         | 1.000    |            |         |
| ai          | ph       |            |         |

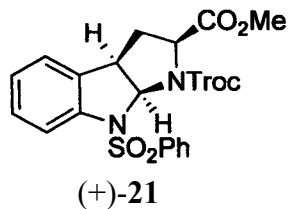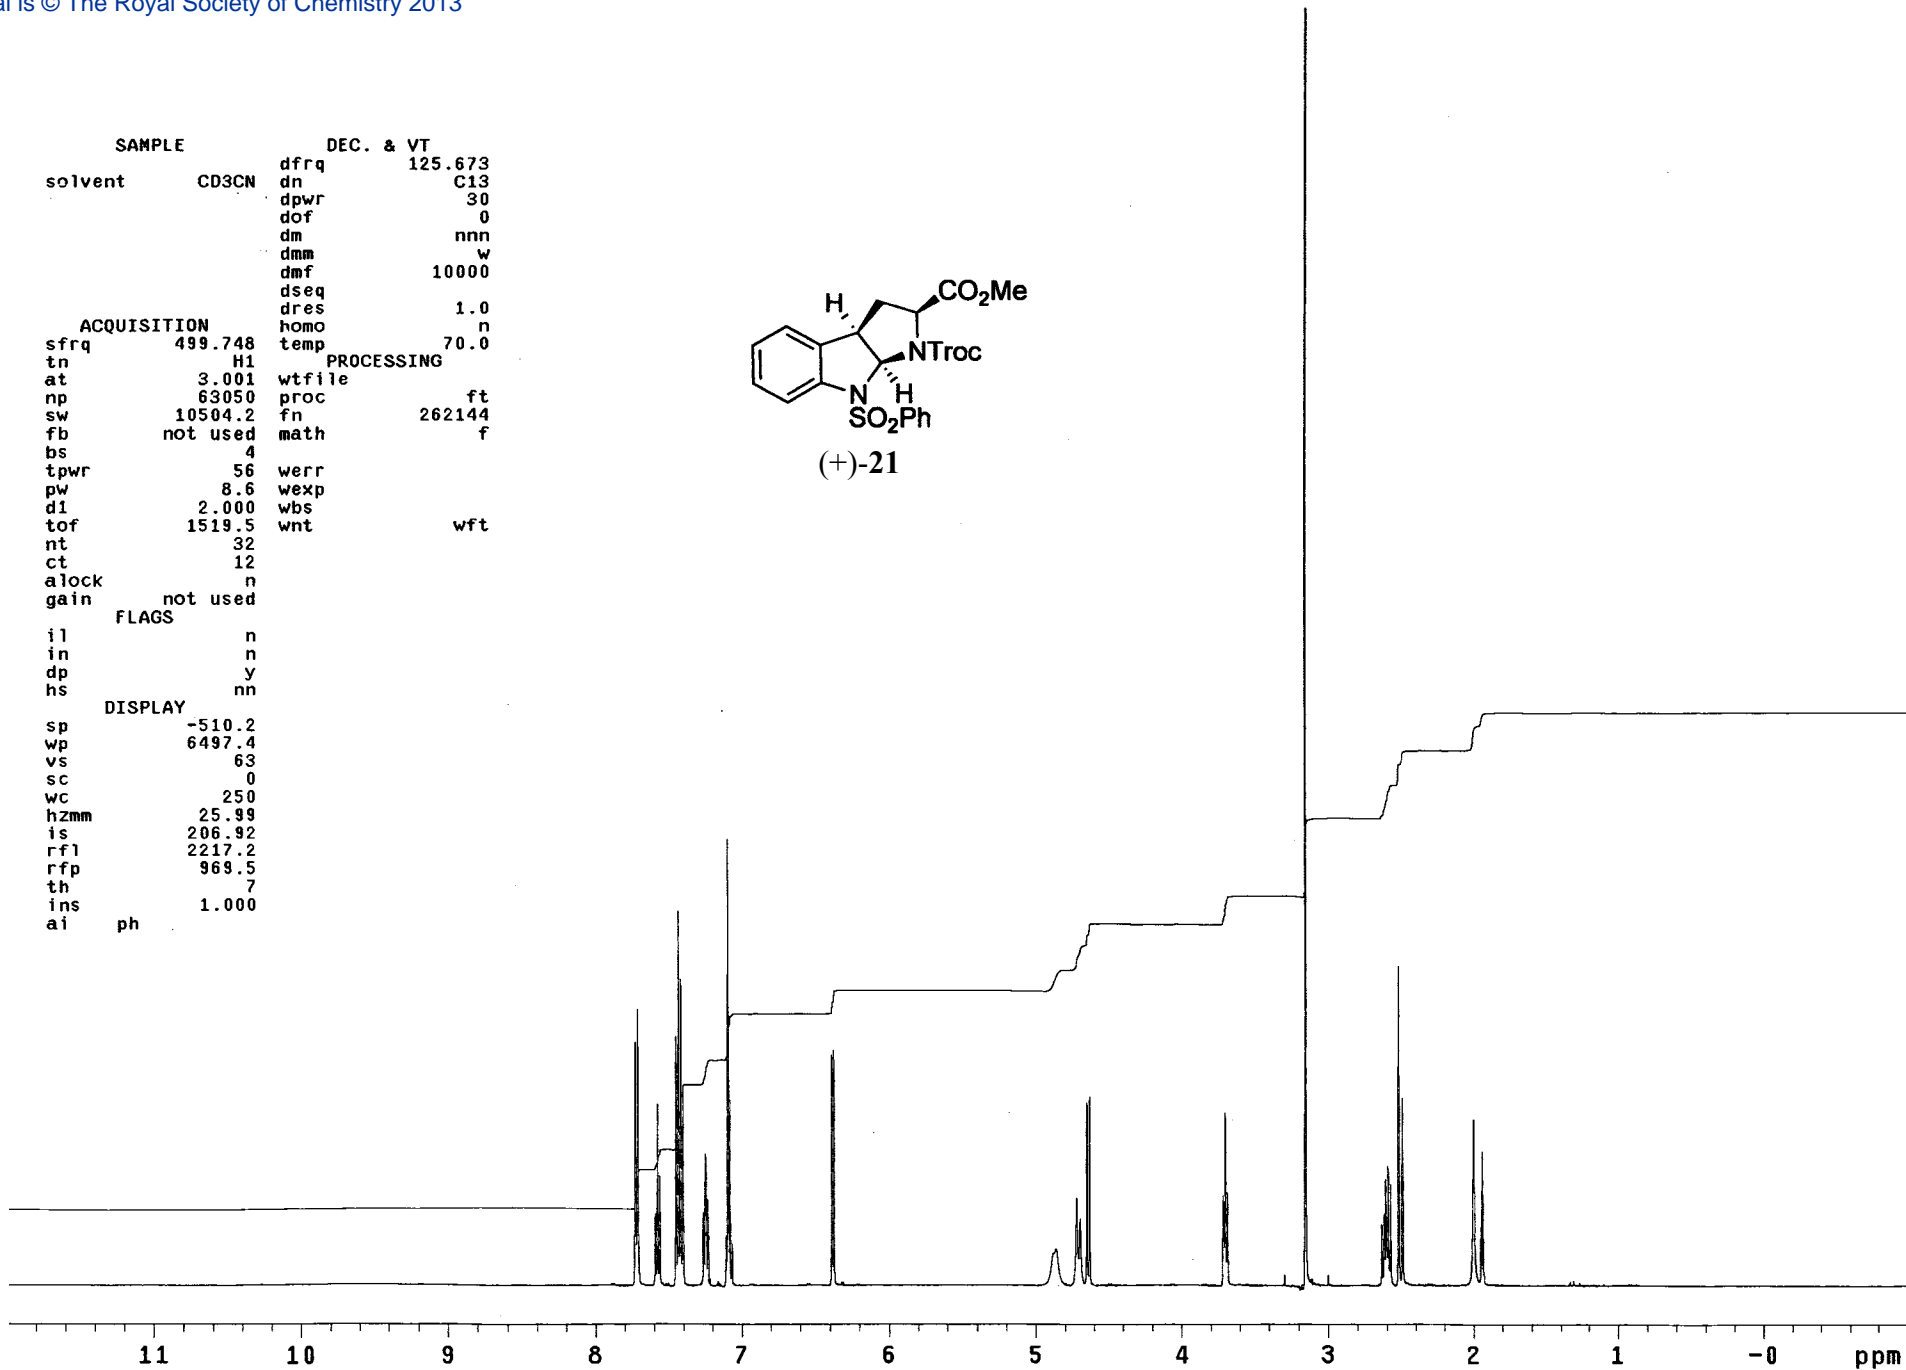

| SAMPLE      |          | DEC. & VT  |         |
|-------------|----------|------------|---------|
| solvent     | CD3CN    | dfrq       | 500.232 |
|             |          | dn         | H1      |
|             |          | dpwr       | 38      |
|             |          | dof        | -500.0  |
|             |          | dm         | y       |
|             |          | dmm        | w       |
|             |          | dmf        | 10700   |
|             |          | dseq       |         |
|             |          | dres       | 1.0     |
|             |          | homo       | n       |
|             |          | temp       | 70.0    |
| ACQUISITION |          | PROCESSING |         |
| sfrq        | 125.795  | lb         | 0.30    |
| tn          | C13      | wtfile     |         |
| at          | 1.736    | proc       | ft      |
| np          | 131010   | fn         | 131072  |
| sw          | 37735.8  | math       | f       |
| fb          | not used |            |         |
| bs          | 16       |            |         |
| ss          | 1        |            |         |
| tpwr        | 59       | werr       |         |
| pw          | 6.9      | wexp       |         |
| d1          | 0.763    | wbs        |         |
| tof         | 631.4    | wnt        |         |
| nt          | 10000    |            |         |
| ct          | 2384     |            |         |
| alock       | n        |            |         |
| gain        | not used |            |         |
| FLAGS       |          |            |         |
| il          | n        |            |         |
| in          | n        |            |         |
| dp          | y        |            |         |
| hs          | nn       |            |         |
| DISPLAY     |          |            |         |
| sp          | -2543.9  |            |         |
| wp          | 30229.1  |            |         |
| vs          | 232      |            |         |
| sc          | 0        |            |         |
| wc          | 250      |            |         |
| hzmm        | 120.92   |            |         |
| is          | 500.00   |            |         |
| rfl         | 21012.0  |            |         |
| rfp         | 14876.8  |            |         |
| th          | 2        |            |         |
| ins         | 1.000    |            |         |
| ai          | ph       |            |         |

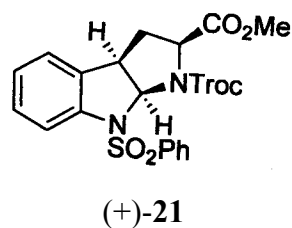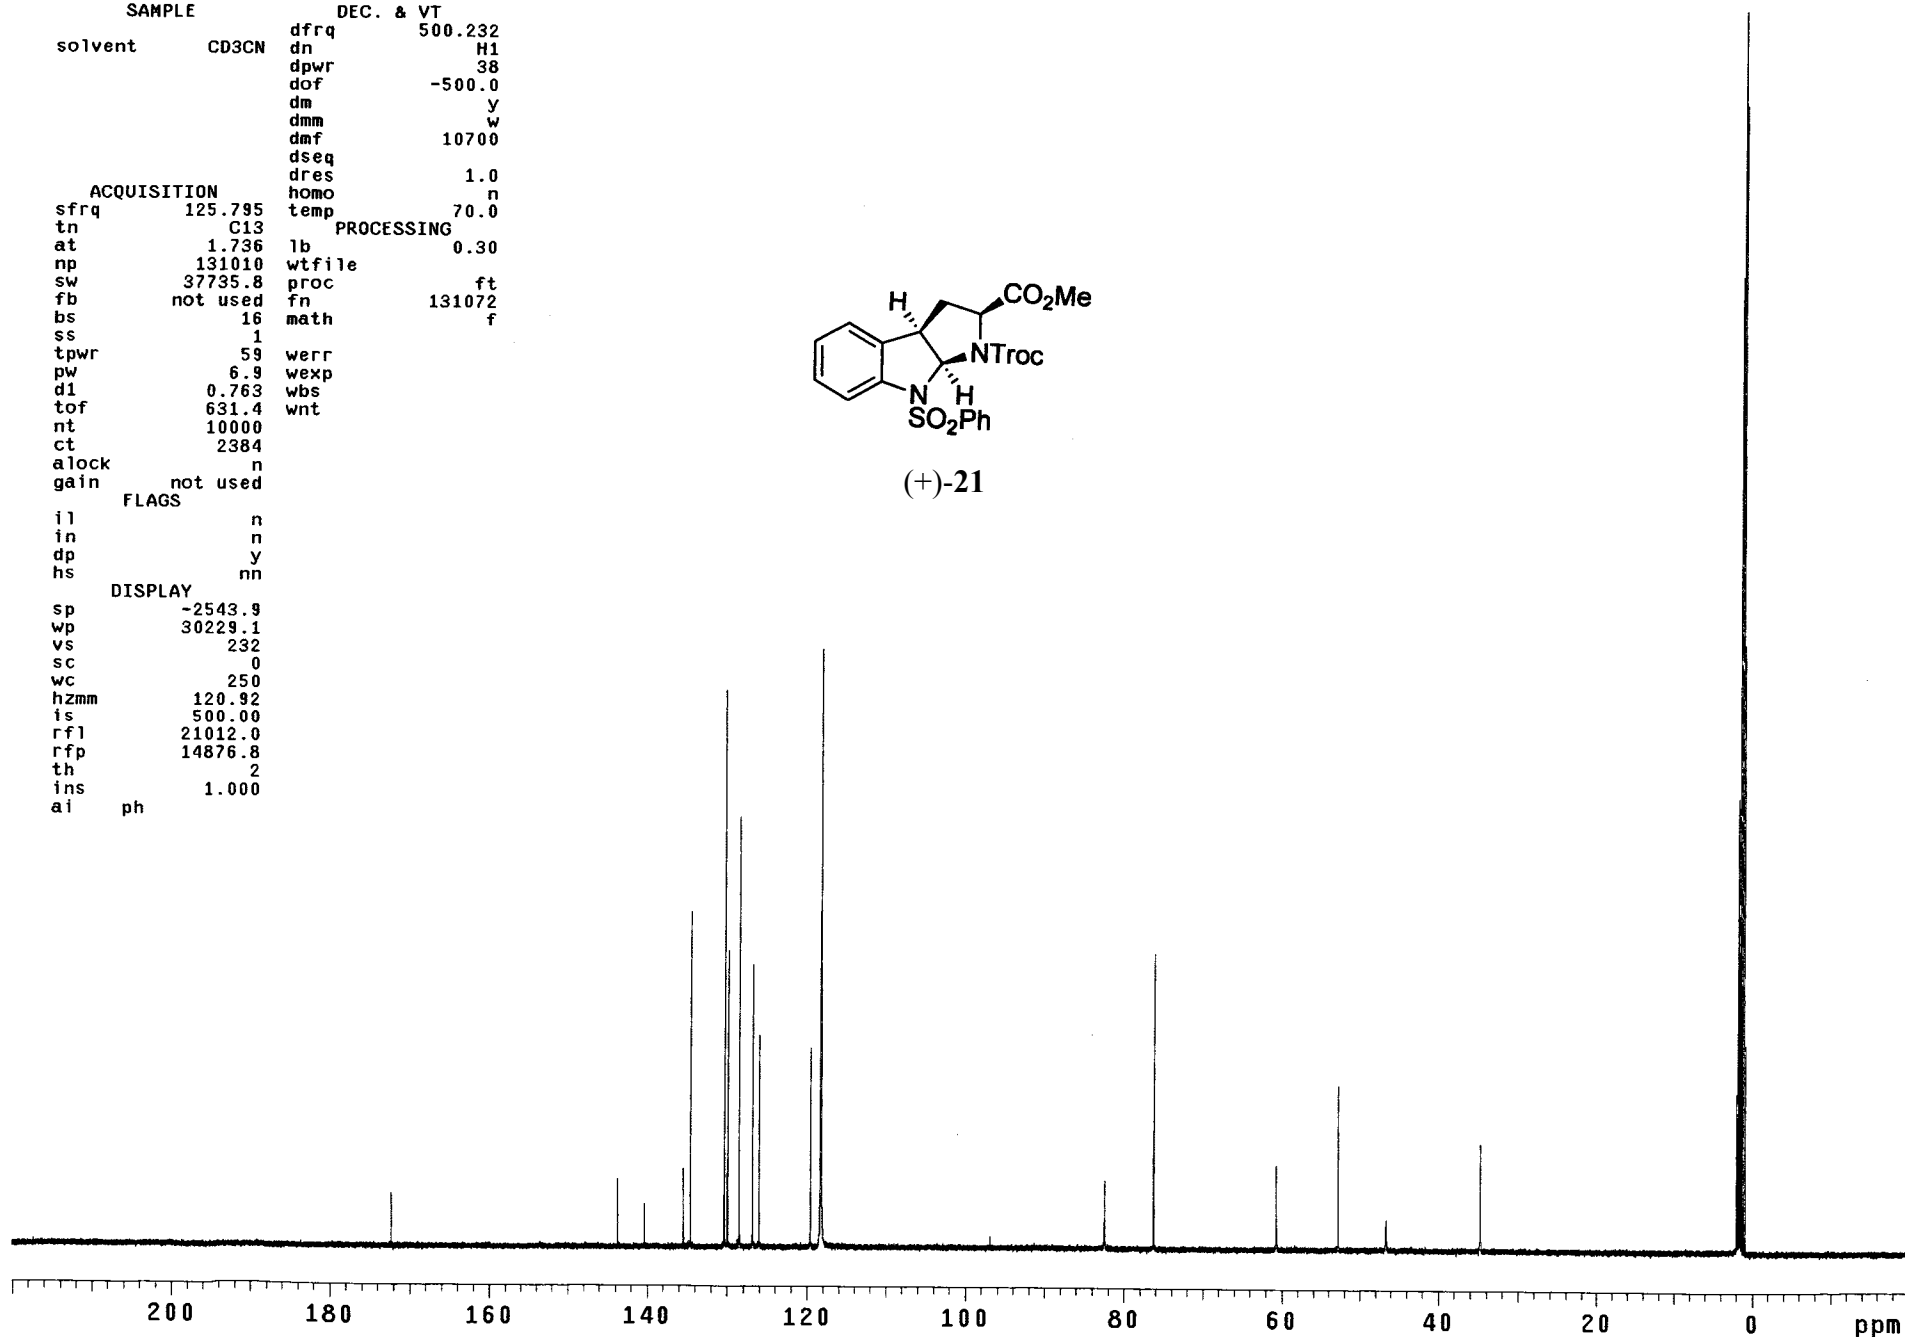

S104/S153

|             |          |            |         |
|-------------|----------|------------|---------|
| SAMPLE      |          | DEC. & VT  |         |
| solvent     | CD3CN    | dfrq       | 125.673 |
|             |          | dn         | C13     |
|             |          | dpwr       | 30      |
|             |          | dof        | 0       |
|             |          | dm         | nnn     |
|             |          | dmm        | w       |
|             |          | dmf        | 10000   |
|             |          | dseq       |         |
|             |          | dres       | 1.0     |
|             |          | homo       | n       |
|             |          | temp       | 70.0    |
| ACQUISITION |          | PROCESSING |         |
| sfrq        | 499.748  | wtfile     | ft      |
| tn          | H1       | proc       | 262144  |
| at          | 3.001    | fn         | f       |
| np          | 63050    | math       |         |
| sw          | 10504.2  |            |         |
| fb          | not used |            |         |
| bs          | 4        |            |         |
| tpwr        | 56       | werr       |         |
| pw          | 8.6      | wexp       |         |
| d1          | 2.000    | wbs        |         |
| tof         | 1519.5   | wnt        | wft     |
| nt          | 16       |            |         |
| ct          | 16       |            |         |
| alock       | n        |            |         |
| gain        | not used |            |         |
| FLAGS       |          |            |         |
| il          | n        |            |         |
| in          | n        |            |         |
| dp          | y        |            |         |
| hs          | nn       |            |         |
| DISPLAY     |          |            |         |
| sp          | -503.1   |            |         |
| wp          | 6505.7   |            |         |
| vs          | 55       |            |         |
| sc          | 0        |            |         |
| wc          | 250      |            |         |
| hzmm        | 26.02    |            |         |
| is          | 160.27   |            |         |
| rfl         | 2218.2   |            |         |
| rfp         | 969.5    |            |         |
| th          | 7        |            |         |
| ins         | 100.000  |            |         |
| ai          | ph       |            |         |

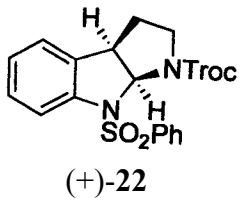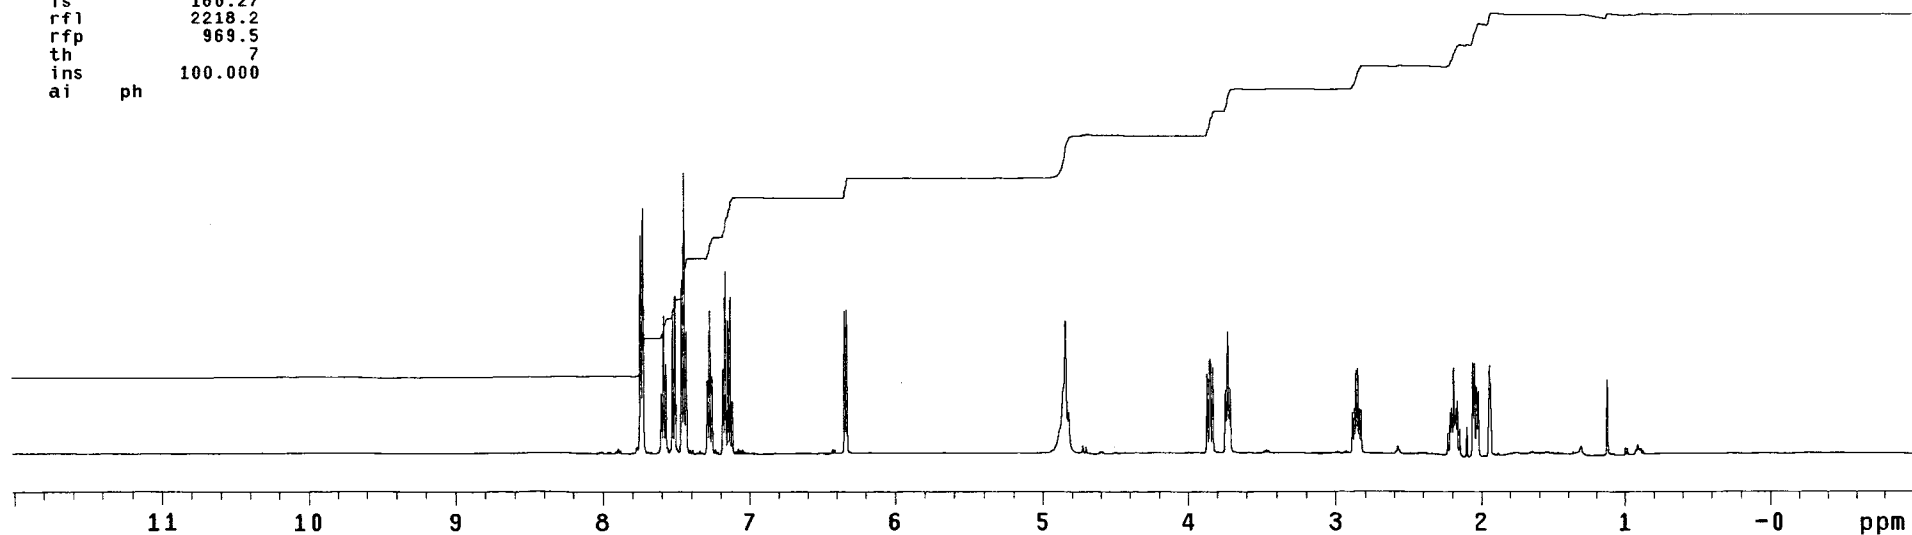



```
SAMPLE          DEC. & VT
solvent          CD3CN      dfrq      500.232
                                dn        H1
                                dpwr      38
                                dof       -500.0
                                dm         y
                                dmm        w
                                dmf       10700
                                dseq
                                dres      1.0
                                homo      n
                                temp     70.0
ACQUISITION      C13      PROCESSING
sfrq      125.795      lb      0.30
tn         1.736      wtfile
np      131010      proc      ft
sw      37735.8      fn      131072
fb      not used      math      f
bs         16
ss         1
tpwr      59      werr
pw         6.9      wexp
d1         0.763      wbs
tof        631.4      wnt
nt      20000
ct      3264
alock      n
gain      not used
FLAGS
il         n
in         n
dp         y
hs         nn
DISPLAY
sp      -2551.1
wp      30229.1
vs         121
sc         0
wc         250
hzmm      120.92
is         500.00
rf1      21012.8
rfp      14929.1
th         20
ins       1.000
ai      ph
```

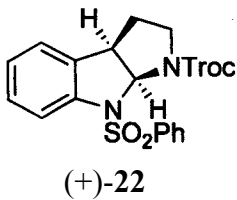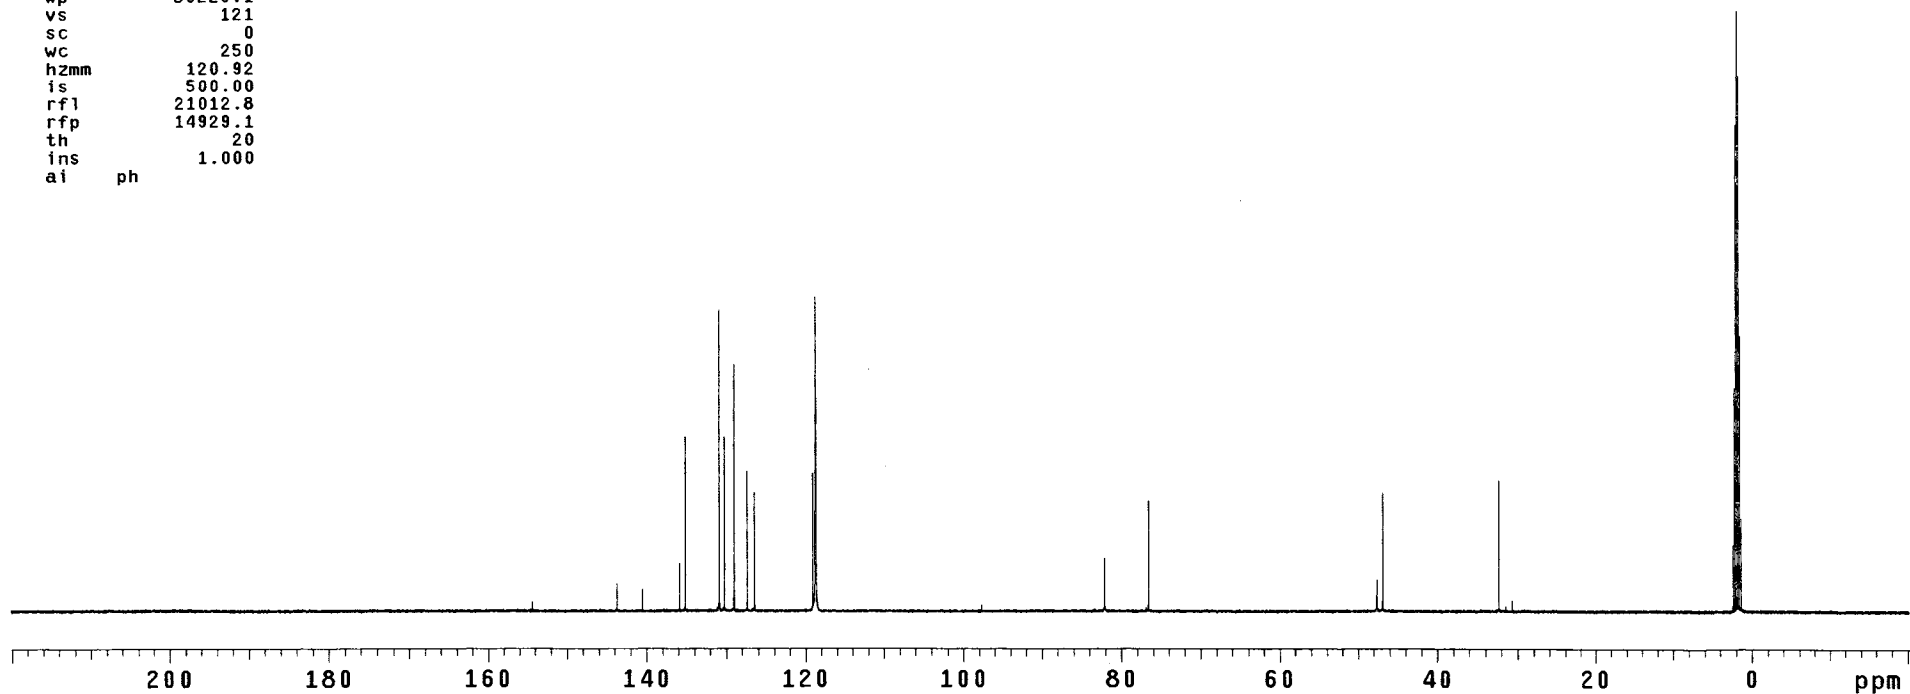

| SAMPLE      |          | DEC. & VT  |         |
|-------------|----------|------------|---------|
| solvent     | CD3CN    | dfrq       | 125.673 |
|             |          | dn         | C13     |
|             |          | dpwr       | 30      |
|             |          | dof        | 0       |
|             |          | dm         | nnn     |
|             |          | dmm        | w       |
|             |          | dmf        | 10000   |
|             |          | dseq       |         |
|             |          | dres       | 1.0     |
|             |          | homo       | n       |
|             |          | temp       | 70.0    |
| ACQUISITION |          | PROCESSING |         |
| sfrq        | 499.748  |            |         |
| tn          | H1       |            |         |
| at          | 3.001    | wtfile     |         |
| np          | 63050    | proc       | ft      |
| sw          | 10504.2  | fn         | 262144  |
| fb          | not used | math       | f       |
| bs          | 4        |            |         |
| tpwr        | 56       | werr       |         |
| pw          | 8.6      | wexp       |         |
| d1          | 2.000    | wbs        |         |
| tof         | 1519.5   | wnt        | wft     |
| nt          | 16       |            |         |
| ct          | 16       |            |         |
| alock       | n        |            |         |
| gain        | not used |            |         |
| FLAGS       |          |            |         |
| il          | n        |            |         |
| in          | n        |            |         |
| dp          | y        |            |         |
| hs          | nn       |            |         |
| DISPLAY     |          |            |         |
| sp          | -518.1   |            |         |
| wp          | 6494.3   |            |         |
| vs          | 98       |            |         |
| sc          | 0        |            |         |
| wc          | 250      |            |         |
| hzmm        | 25.98    |            |         |
| is          | 186.52   |            |         |
| rfl         | 2218.3   |            |         |
| rfp         | 969.5    |            |         |
| th          | 7        |            |         |
| ins         | 100.000  |            |         |
| ai          | ph       |            |         |

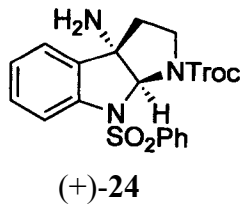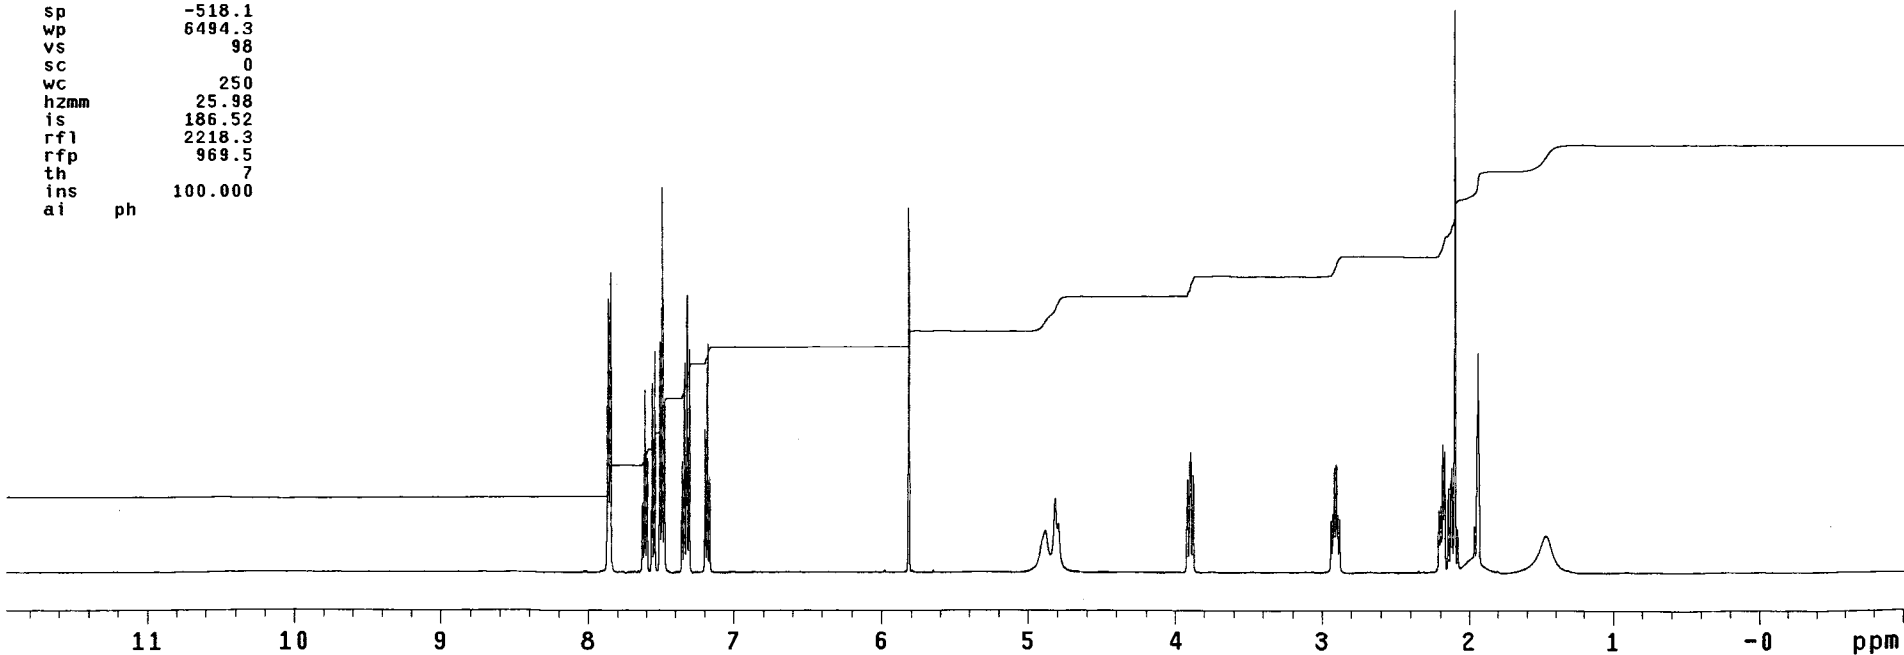

**(+)-24**

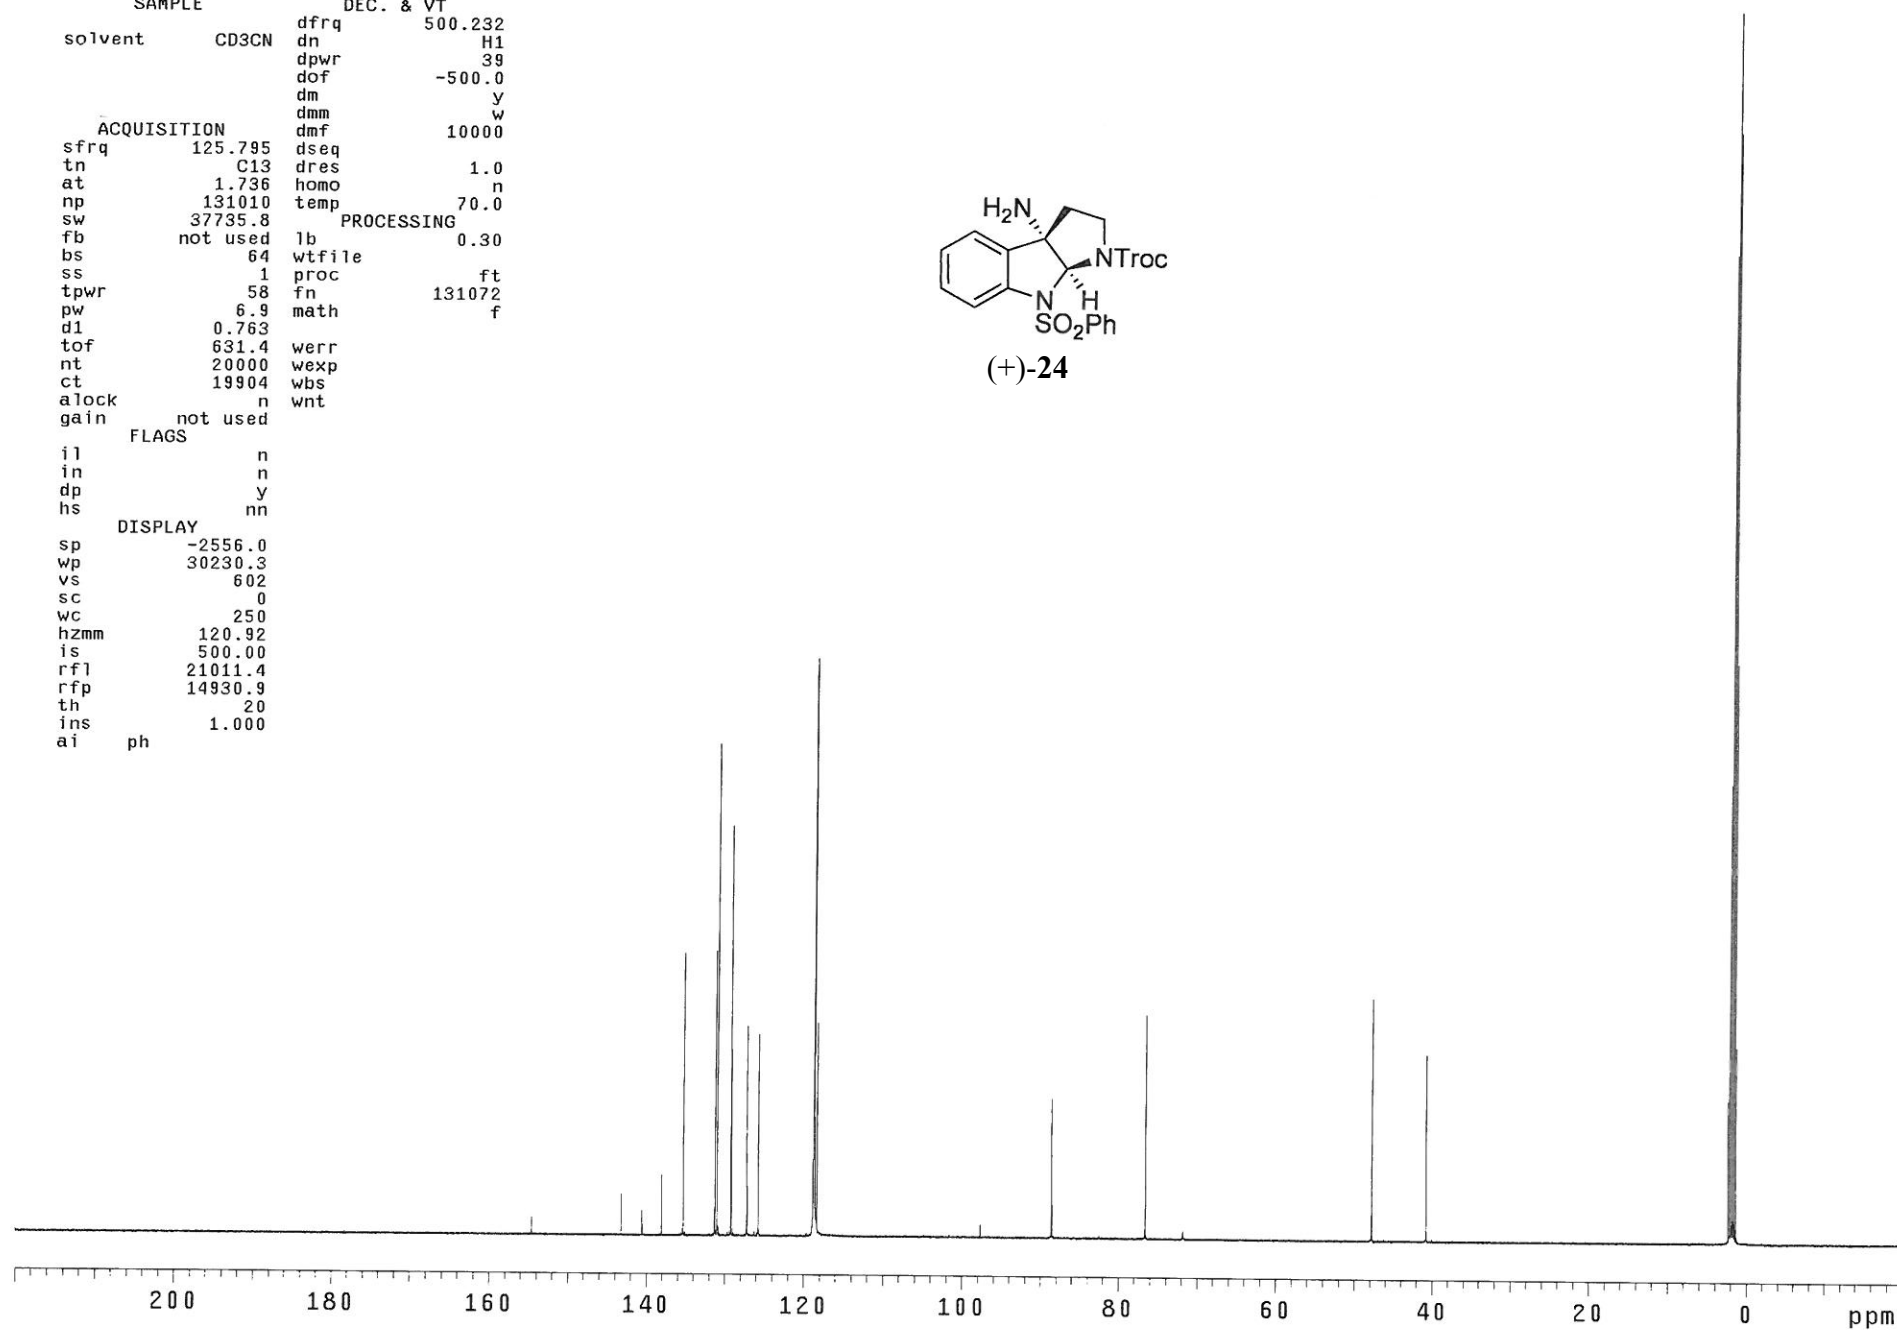

S108/S153

| SAMPLE      |          | DEC. & VT  |         |
|-------------|----------|------------|---------|
| solvent     | Benzene  | dfrq       | 125.672 |
|             |          | dn         | C13     |
|             |          | dpwr       | 30      |
|             |          | dof        | 0       |
|             |          | dm         | nnn     |
|             |          | dmm        | w       |
|             |          | dmf        | 10000   |
|             |          | dseq       | 1.0     |
|             |          | dres       | 1.0     |
|             |          | homo       | n       |
|             |          | temp       | 70.0    |
| ACQUISITION |          | PROCESSING |         |
| sfrq        | 499.746  | wtfile     |         |
| tn          | H1       | proc       | ft      |
| at          | 3.001    | fn         | 262144  |
| np          | 63050    | math       | f       |
| sw          | 10504.2  |            |         |
| fb          | not used |            |         |
| bs          | 4        |            |         |
| tpwr        | 56       | werr       |         |
| pw          | 8.6      | wexp       |         |
| d1          | 2.000    | wbs        |         |
| tof         | 1519.5   | wnt        | wft     |
| nt          | 16       |            |         |
| ct          | 16       |            |         |
| alock       | n        |            |         |
| gain        | not used |            |         |
| FLAGS       |          |            |         |
| il          | n        |            |         |
| in          | n        |            |         |
| dp          | y        |            |         |
| hs          | nn       |            |         |
| DISPLAY     |          |            |         |
| sp          | -502.9   |            |         |
| wp          | 6494.3   |            |         |
| vs          | 77       |            |         |
| sc          | 0        |            |         |
| wc          | 250      |            |         |
| hzmm        | 25.98    |            |         |
| is          | 167.69   |            |         |
| rfl         | 4793.6   |            |         |
| rfp         | 3578.2   |            |         |
| th          | 7        |            |         |
| ins         | 100.000  |            |         |
| ai          | ph       |            |         |

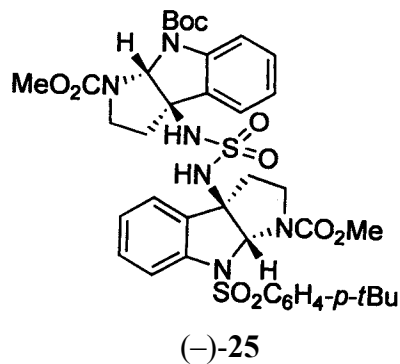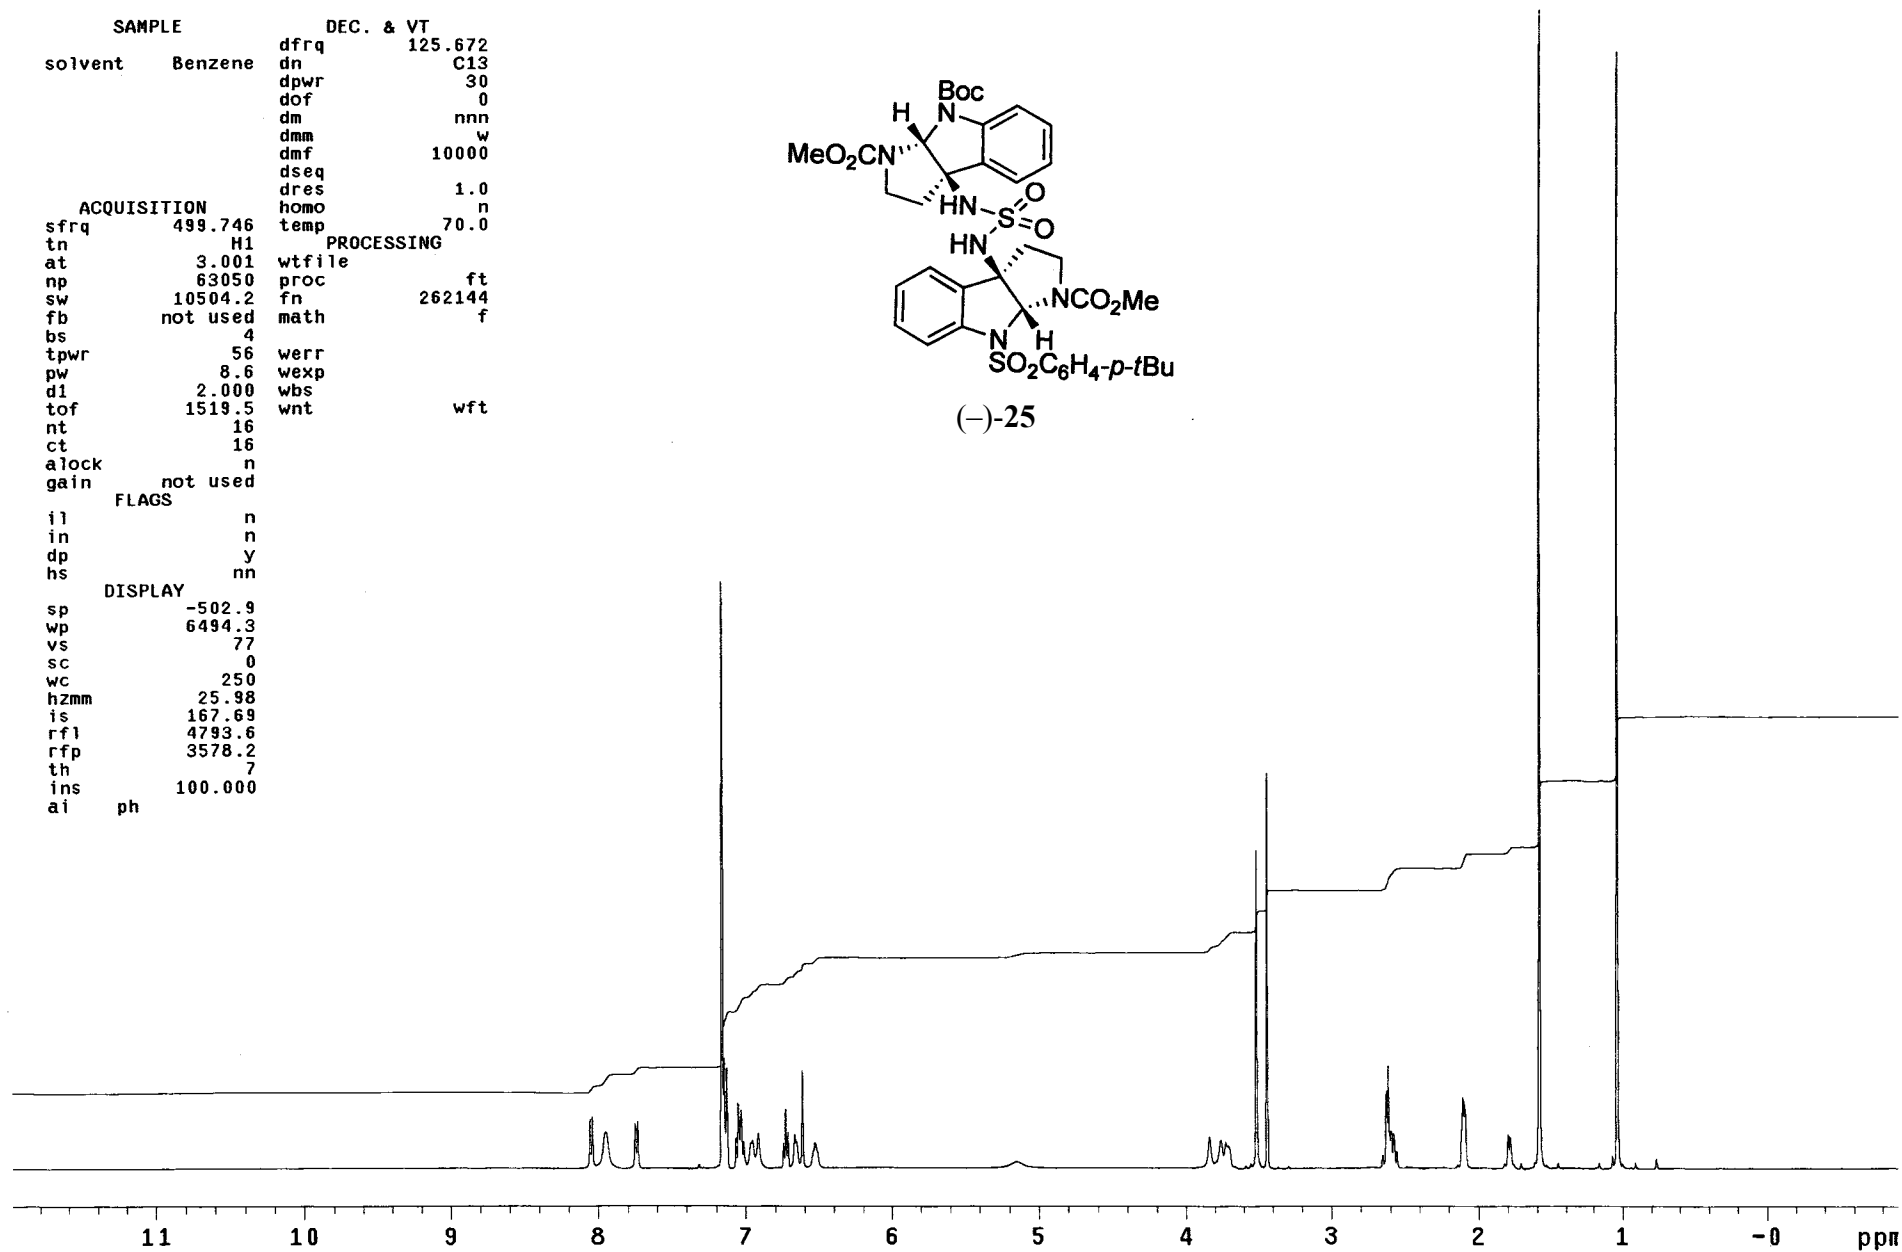

S109/S153

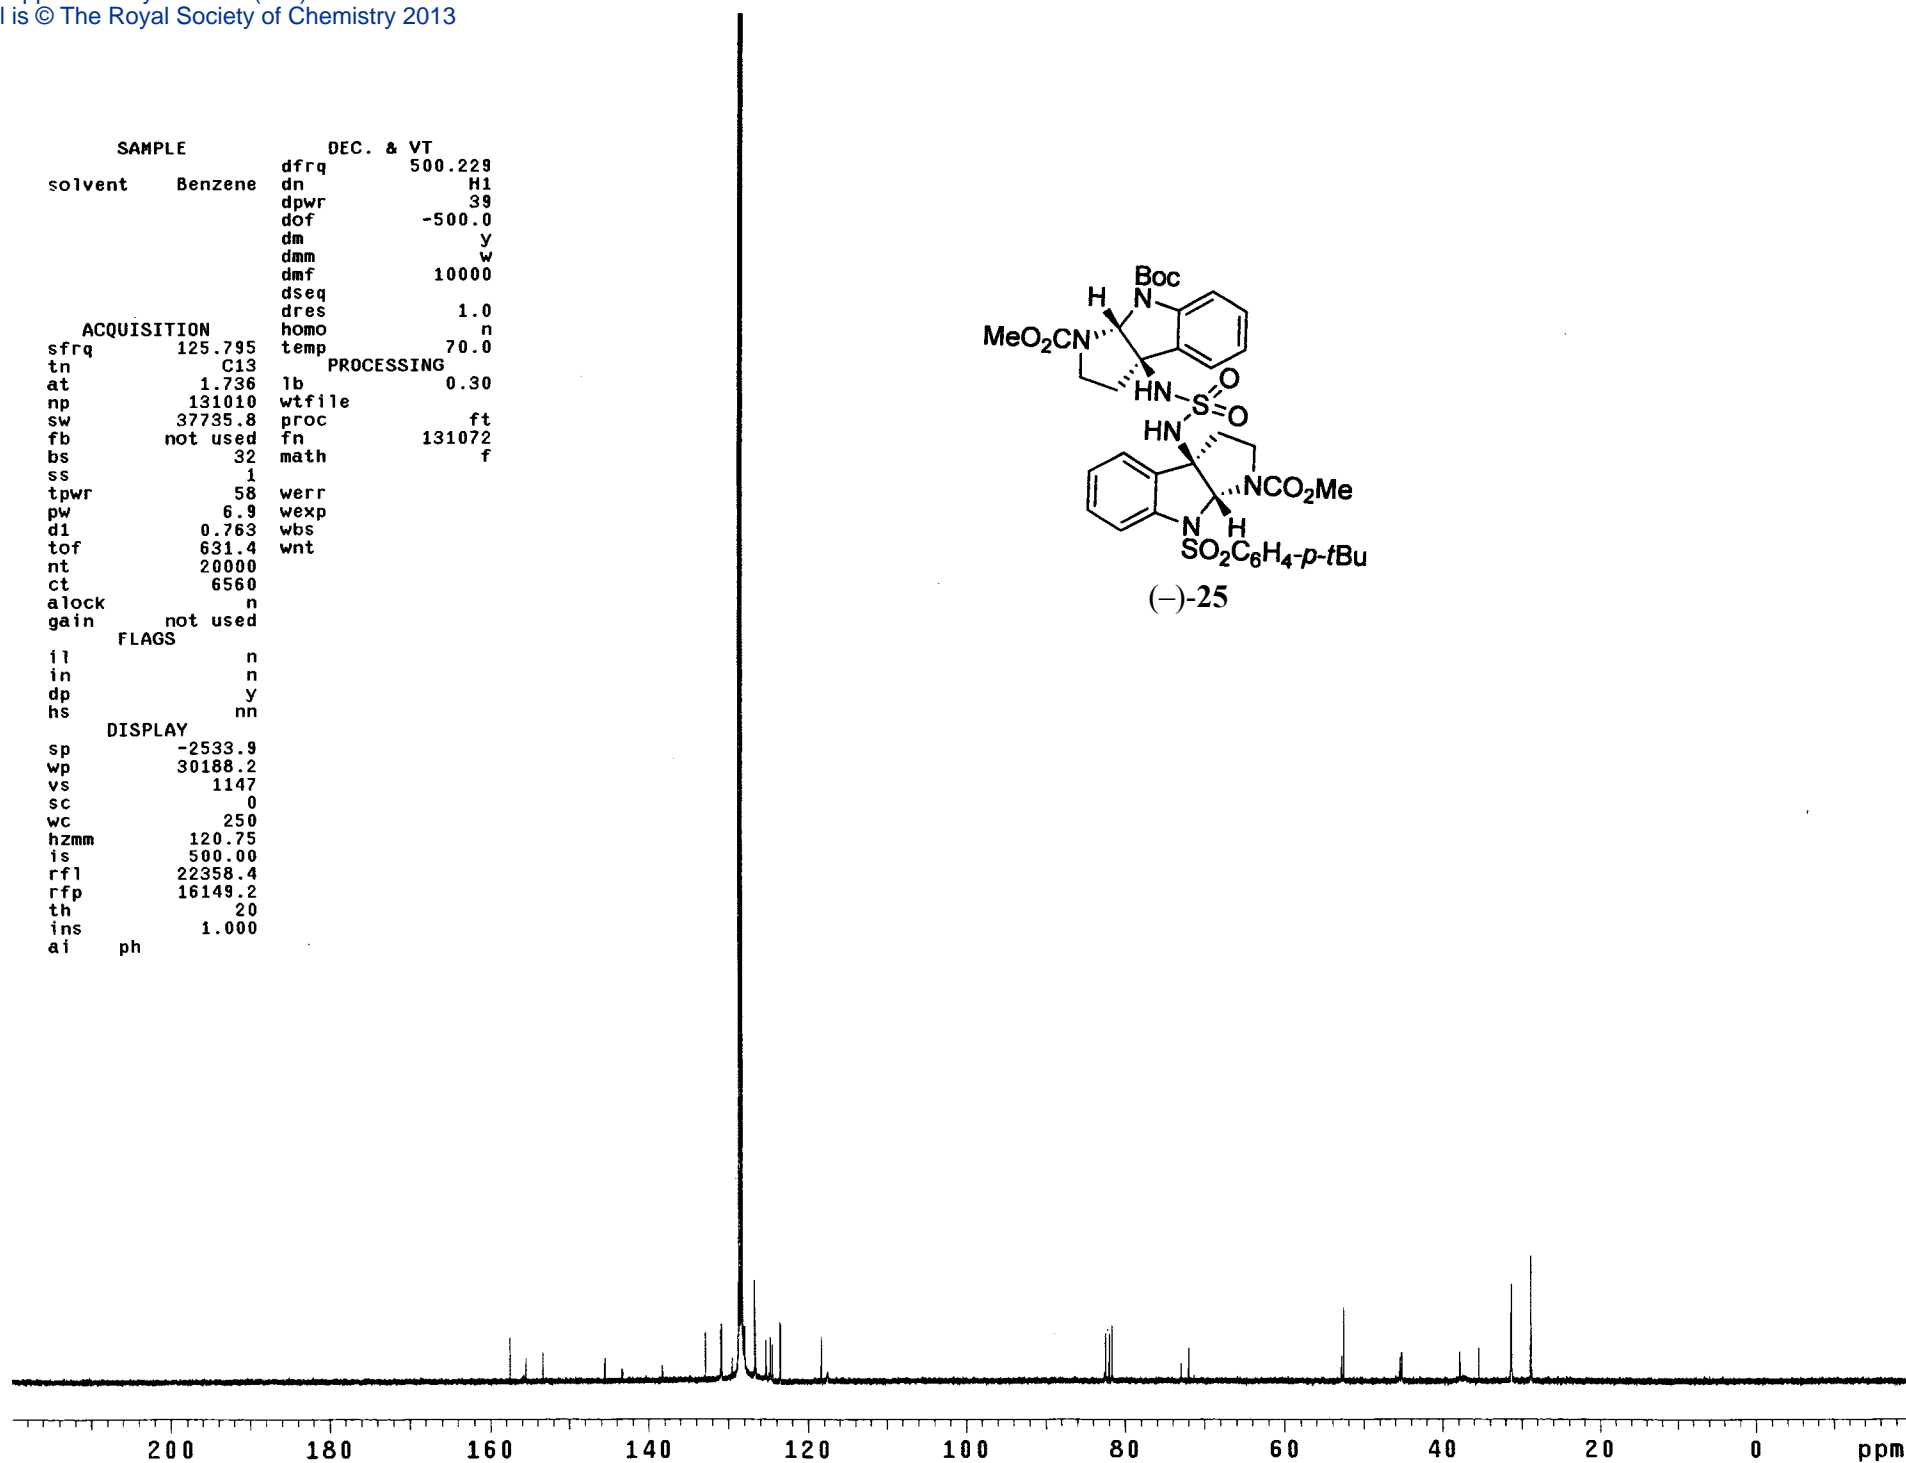

S110/S153

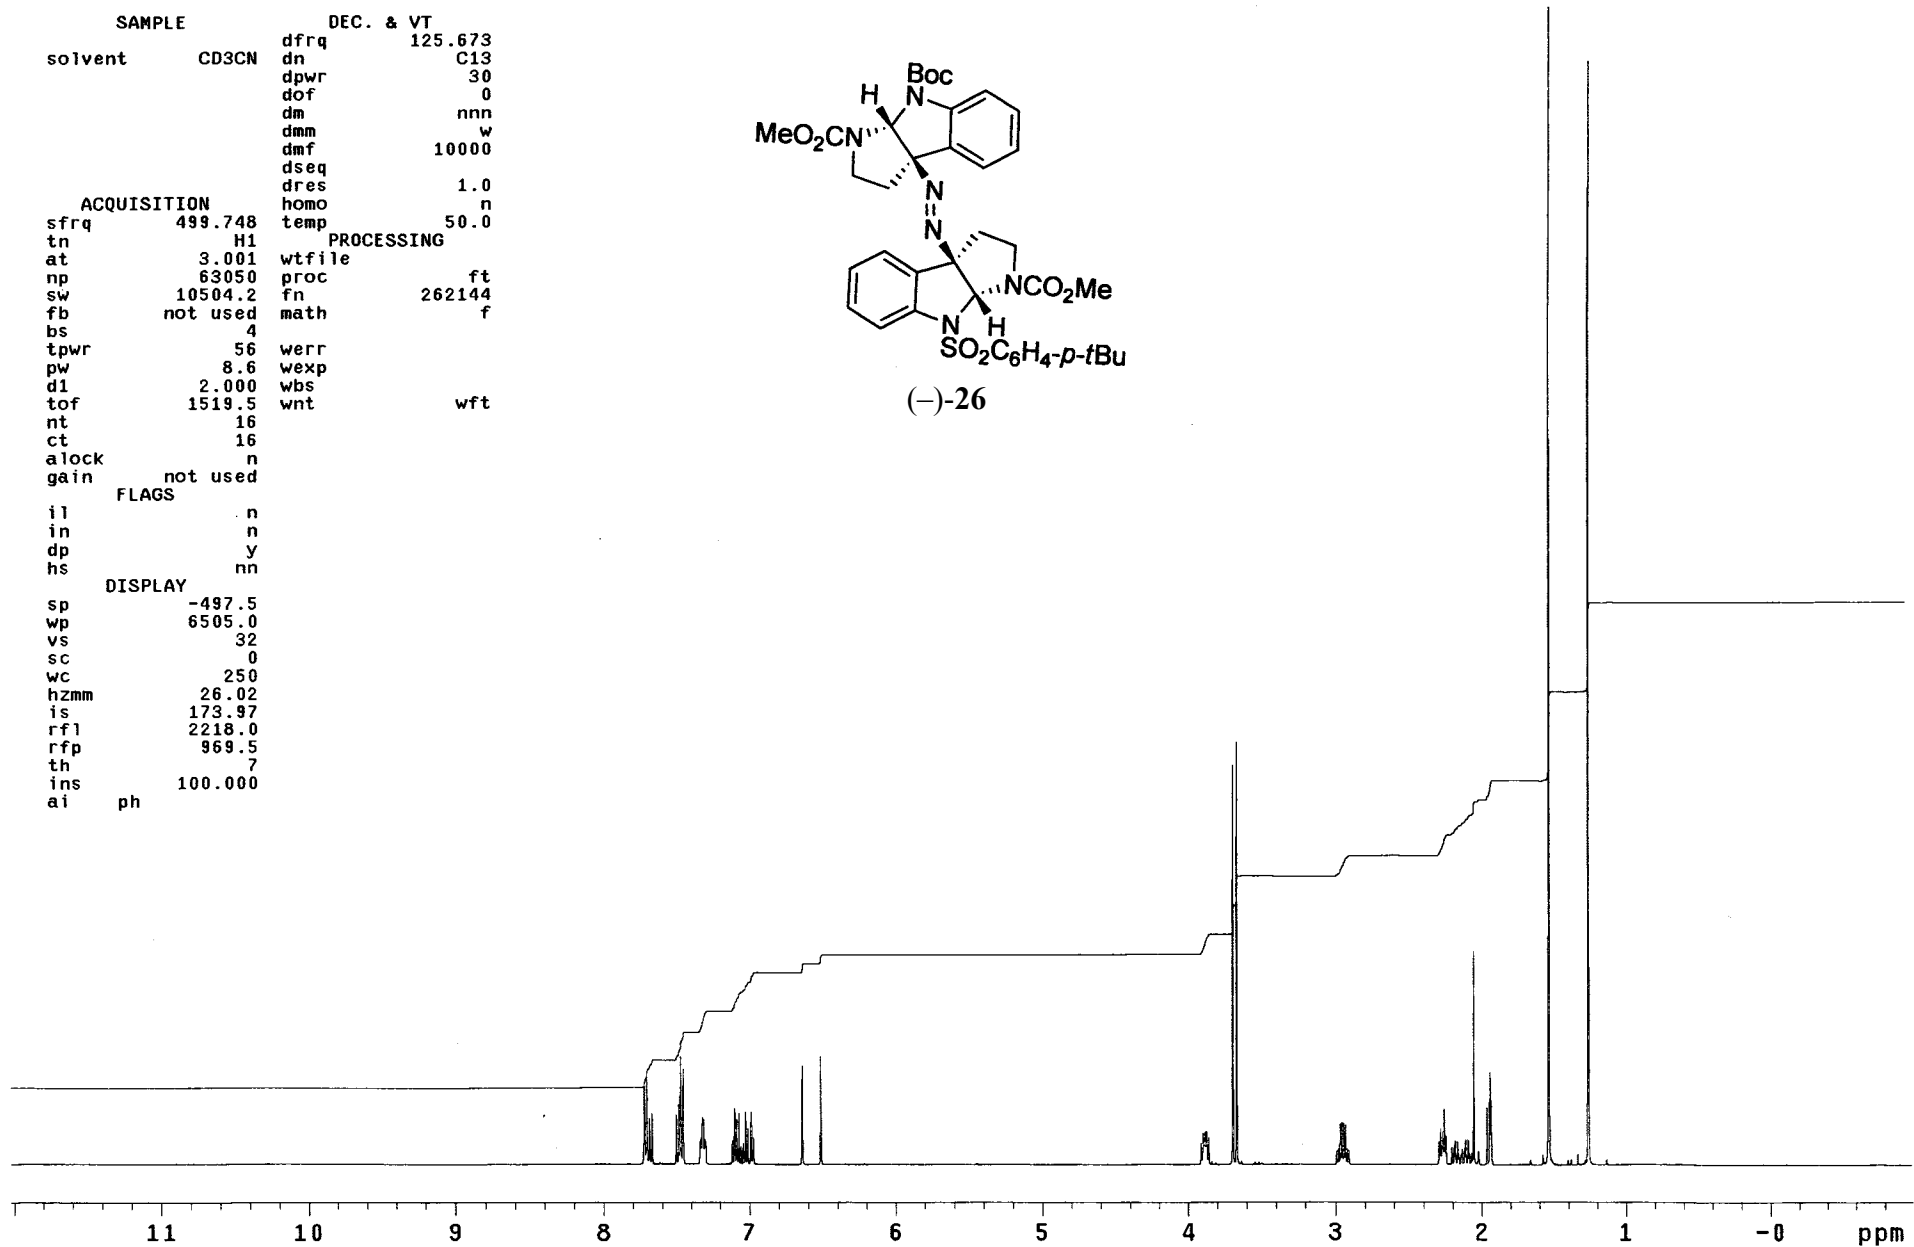

| SAMPLE      |          | DEC. & VT  |         |
|-------------|----------|------------|---------|
| solvent     | CD3CN    | dfrq       | 500.232 |
|             |          | dn         | H1      |
|             |          | dpwr       | 39      |
|             |          | dof        | -500.0  |
|             |          | dm         | y       |
|             |          | dmm        | w       |
|             |          | dmf        | 10000   |
|             |          | dseq       |         |
|             |          | dres       | 1.0     |
|             |          | homo       | n       |
|             |          | temp       | 50.0    |
| ACQUISITION |          | PROCESSING |         |
| sfrq        | 125.795  | lb         | 0.30    |
| tn          | C13      | wtfile     |         |
| at          | 1.736    | proc       | ft      |
| np          | 131010   | fn         | 131072  |
| sw          | 37735.8  | math       | f       |
| fb          | not used |            |         |
| bs          | 64       |            |         |
| ss          | 1        |            |         |
| tpwr        | 58       | werr       |         |
| pw          | 6.9      | wexp       |         |
| d1          | 0.763    | wbs        |         |
| tof         | 631.4    | wnt        |         |
| nt          | 25000    |            |         |
| ct          | 20352    |            |         |
| alock       | n        |            |         |
| gain        | not used |            |         |
| FLAGS       |          |            |         |
| il          | n        |            |         |
| in          | n        |            |         |
| dp          | y        |            |         |
| hs          | nn       |            |         |
| DISPLAY     |          |            |         |
| sp          | -2500.4  |            |         |
| wp          | 30175.6  |            |         |
| vs          | 251      |            |         |
| sc          | 0        |            |         |
| wc          | 250      |            |         |
| hzmm        | 120.70   |            |         |
| is          | 500.00   |            |         |
| rfl         | 21037.0  |            |         |
| rfp         | 14929.1  |            |         |
| th          | 20       |            |         |
| ins         | 1.000    |            |         |
| ai          | ph       |            |         |

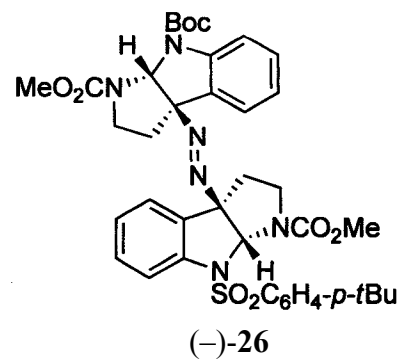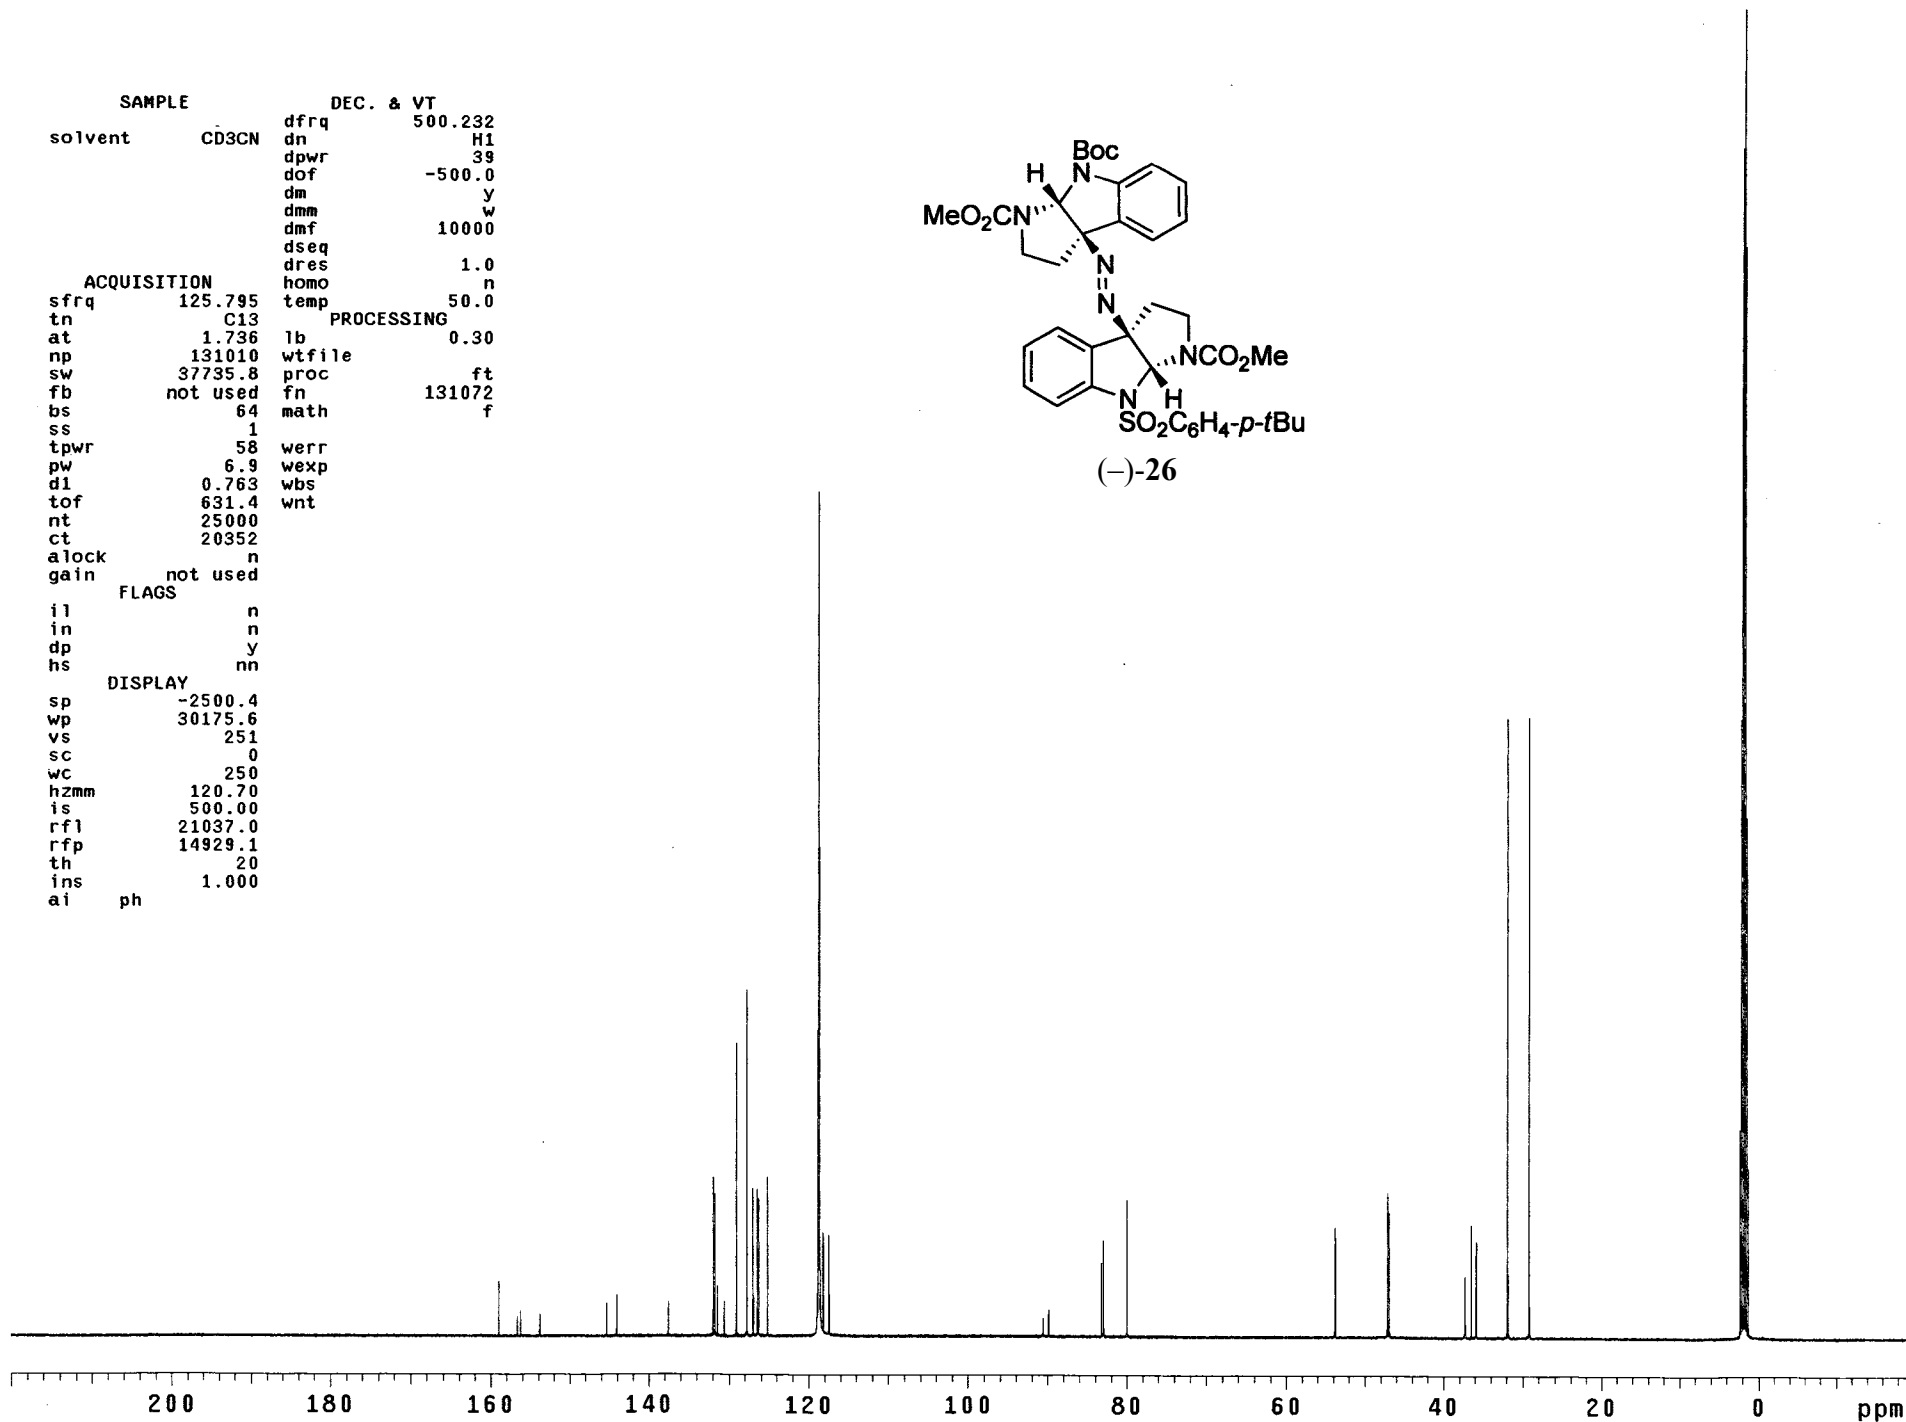

S112/S153

| SAMPLE      |          | DEC. & VT  |         |
|-------------|----------|------------|---------|
| solvent     | CD3CN    | dfrq       | 125.673 |
|             |          | dn         | C13     |
|             |          | dpwr       | 30      |
|             |          | dof        | 0       |
|             |          | dm         | nnn     |
|             |          | dmm        | w       |
|             |          | dmf        | 10000   |
|             |          | dseq       |         |
|             |          | dres       | 1.0     |
|             |          | homo       | n       |
|             |          | temp       | 75.0    |
| ACQUISITION |          | PROCESSING |         |
| sfrq        | 499.748  | wtfile     |         |
| tn          | H1       | proc       | ft      |
| at          | 3.001    | fn         | 262144  |
| np          | 63050    | math       | f       |
| sw          | 10504.2  |            |         |
| fb          | not used |            |         |
| bs          | 4        | werr       |         |
| tpwr        | 56       | wexp       |         |
| pw          | 8.6      | wbs        |         |
| d1          | 2.000    | wnt        | wft     |
| tof         | 1519.5   |            |         |
| nt          | 16       |            |         |
| ct          | 16       |            |         |
| alock       | n        |            |         |
| gain        | not used |            |         |
| FLAGS       |          |            |         |
| il          | n        |            |         |
| in          | n        |            |         |
| dp          | y        |            |         |
| hs          | nn       |            |         |
| DISPLAY     |          |            |         |
| sp          | -515.4   |            |         |
| wp          | 6522.5   |            |         |
| vs          | 70       |            |         |
| sc          | 0        |            |         |
| wc          | 250      |            |         |
| hzmm        | 26.09    |            |         |
| is          | 188.01   |            |         |
| rfl         | 2218.5   |            |         |
| rfp         | 969.5    |            |         |
| th          | 7        |            |         |
| ins         | 100.000  |            |         |
| ai          | ph       |            |         |

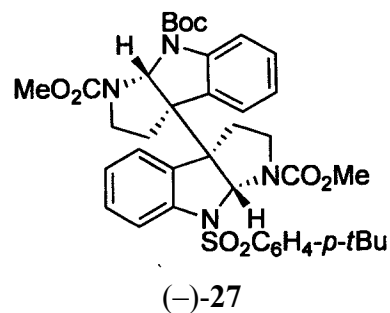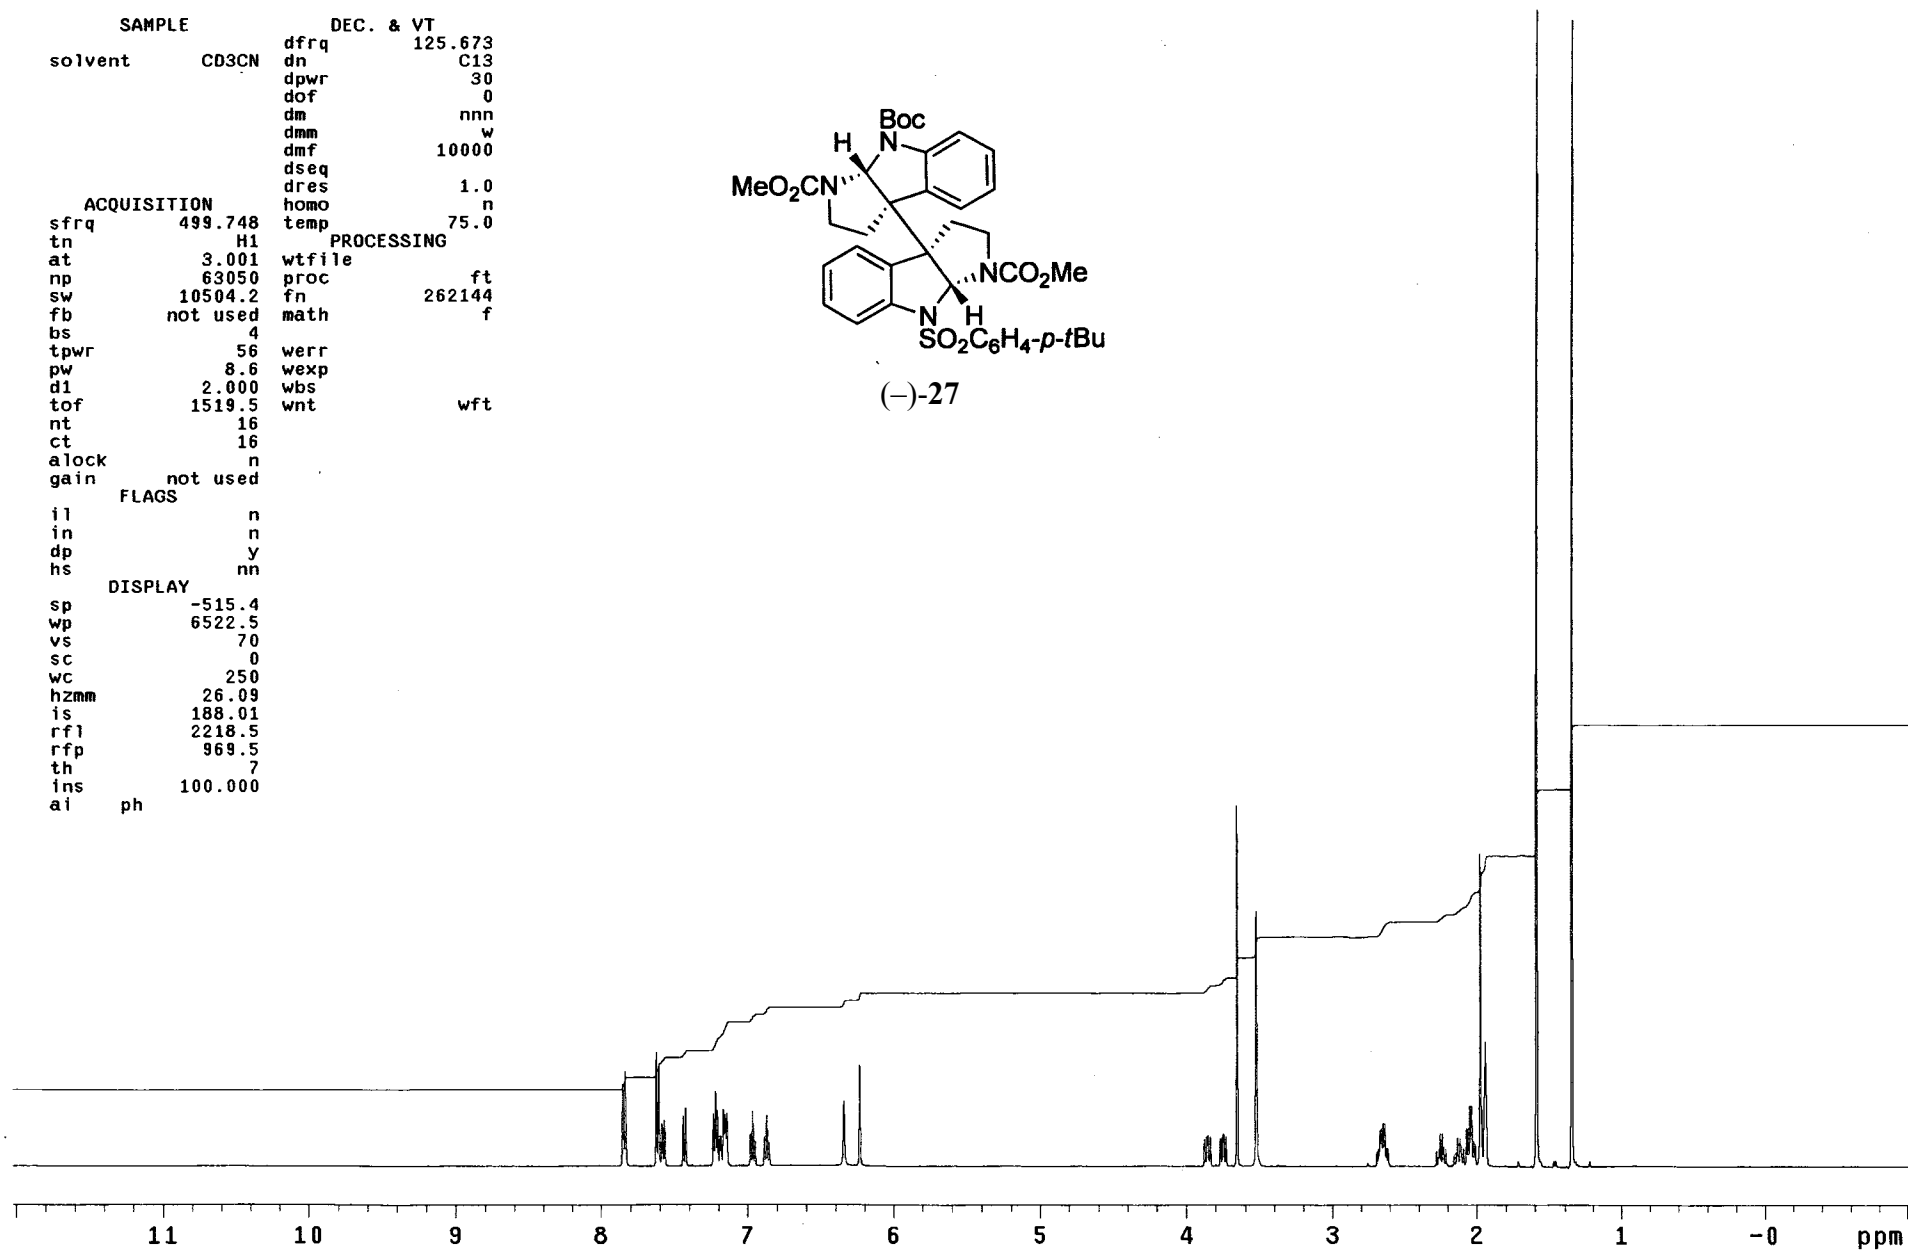



S113/S153

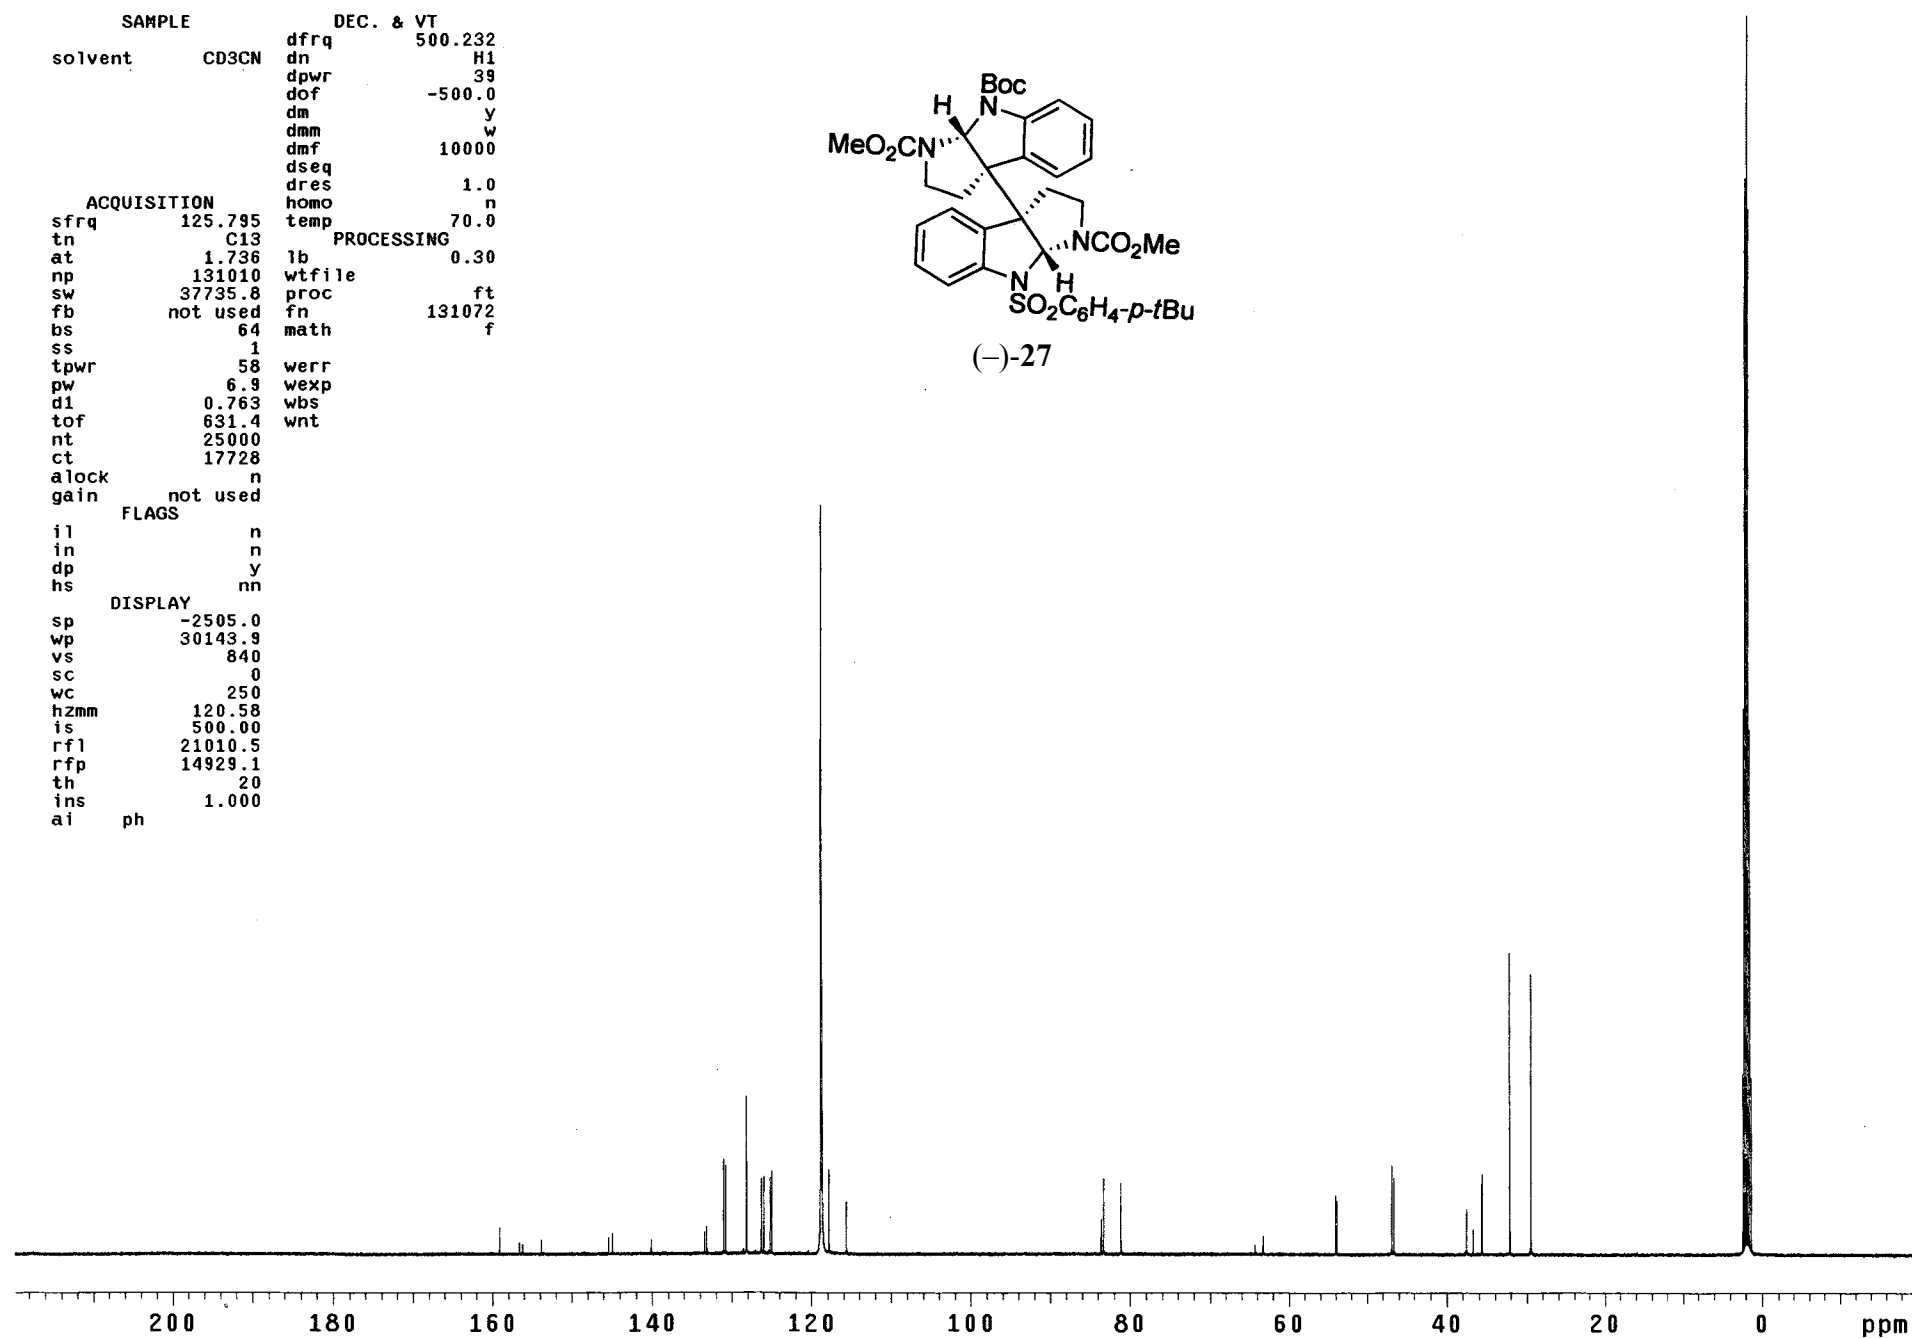

S114/S153

| SAMPLE      |          | DEC. & VT  |         |
|-------------|----------|------------|---------|
| solvent     | Benzene  | dfrq       | 125.672 |
|             |          | dn         | C13     |
|             |          | dpwr       | 30      |
|             |          | dof        | 0       |
|             |          | dm         | nnn     |
|             |          | dmm        | w       |
|             |          | dmf        | 10000   |
|             |          | dseq       |         |
|             |          | dres       | 1.0     |
|             |          | homo       | n       |
|             |          | temp       | 70.0    |
| ACQUISITION |          | PROCESSING |         |
| sfrq        | 499.746  | wtfile     |         |
| tn          | H1       | proc       | ft      |
| at          | 3.001    | fn         | 262144  |
| np          | 63050    | math       | f       |
| sw          | 10504.2  |            |         |
| fb          | not used |            |         |
| bs          | 4        |            |         |
| tpwr        | 56       | werr       |         |
| pw          | 8.6      | wexp       |         |
| d1          | 2.000    | wbs        |         |
| tof         | 1519.5   | wnt        | wft     |
| nt          | 16       |            |         |
| ct          | 16       |            |         |
| alock       | n        |            |         |
| gain        | not used |            |         |
| FLAGS       |          |            |         |
| il          | n        |            |         |
| in          | n        |            |         |
| dp          | y        |            |         |
| hs          | nn       |            |         |
| DISPLAY     |          |            |         |
| sp          | -512.5   |            |         |
| wp          | 6512.6   |            |         |
| vs          | 25       |            |         |
| sc          | 0        |            |         |
| wc          | 250      |            |         |
| hzmm        | 26.05    |            |         |
| is          | 156.68   |            |         |
| rfl         | 4793.9   |            |         |
| rfp         | 3578.2   |            |         |
| th          | 7        |            |         |
| ins         | 100.000  |            |         |
| ai          | ph       |            |         |

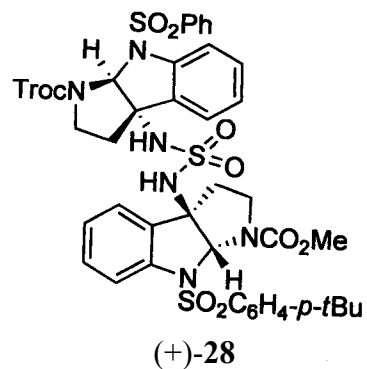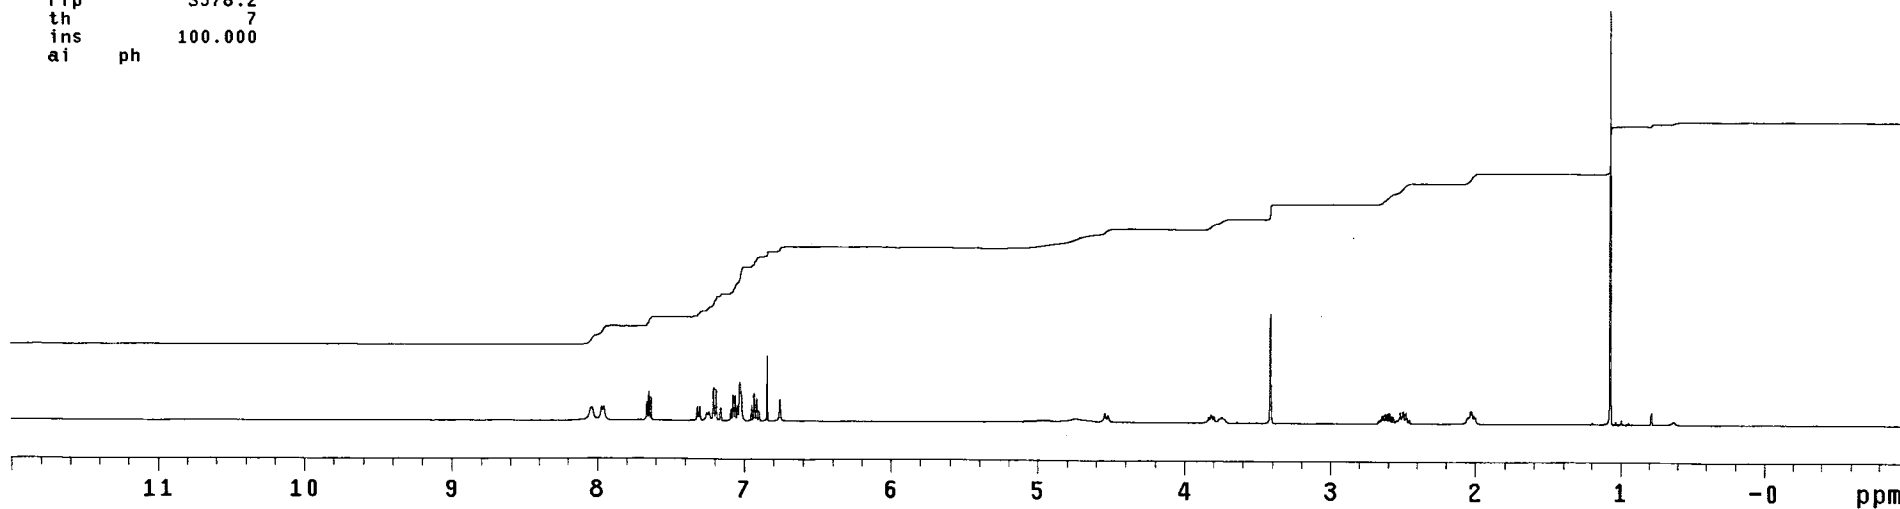

S115/S153

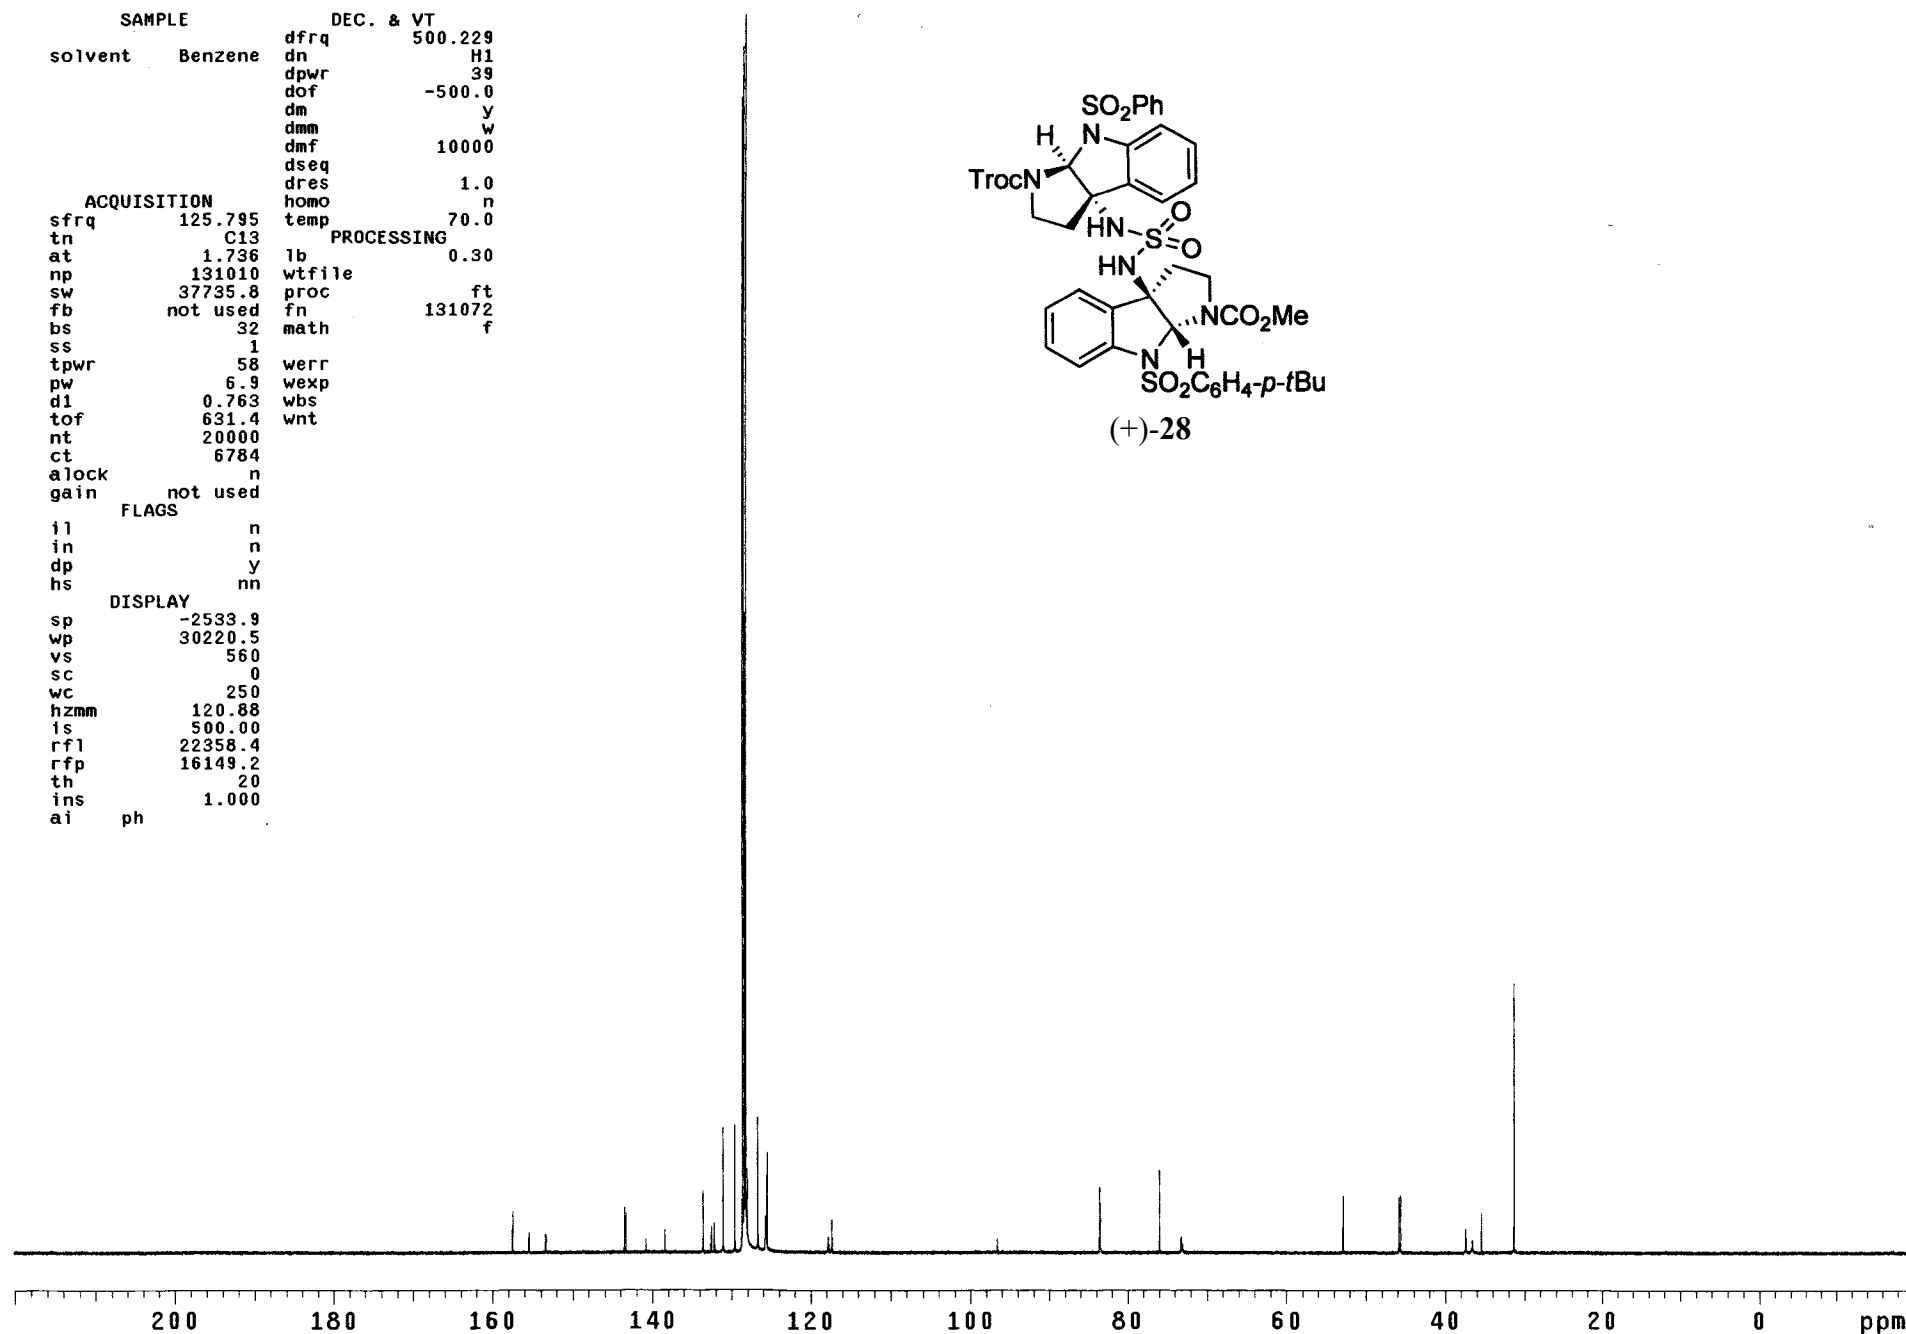

S116/S153

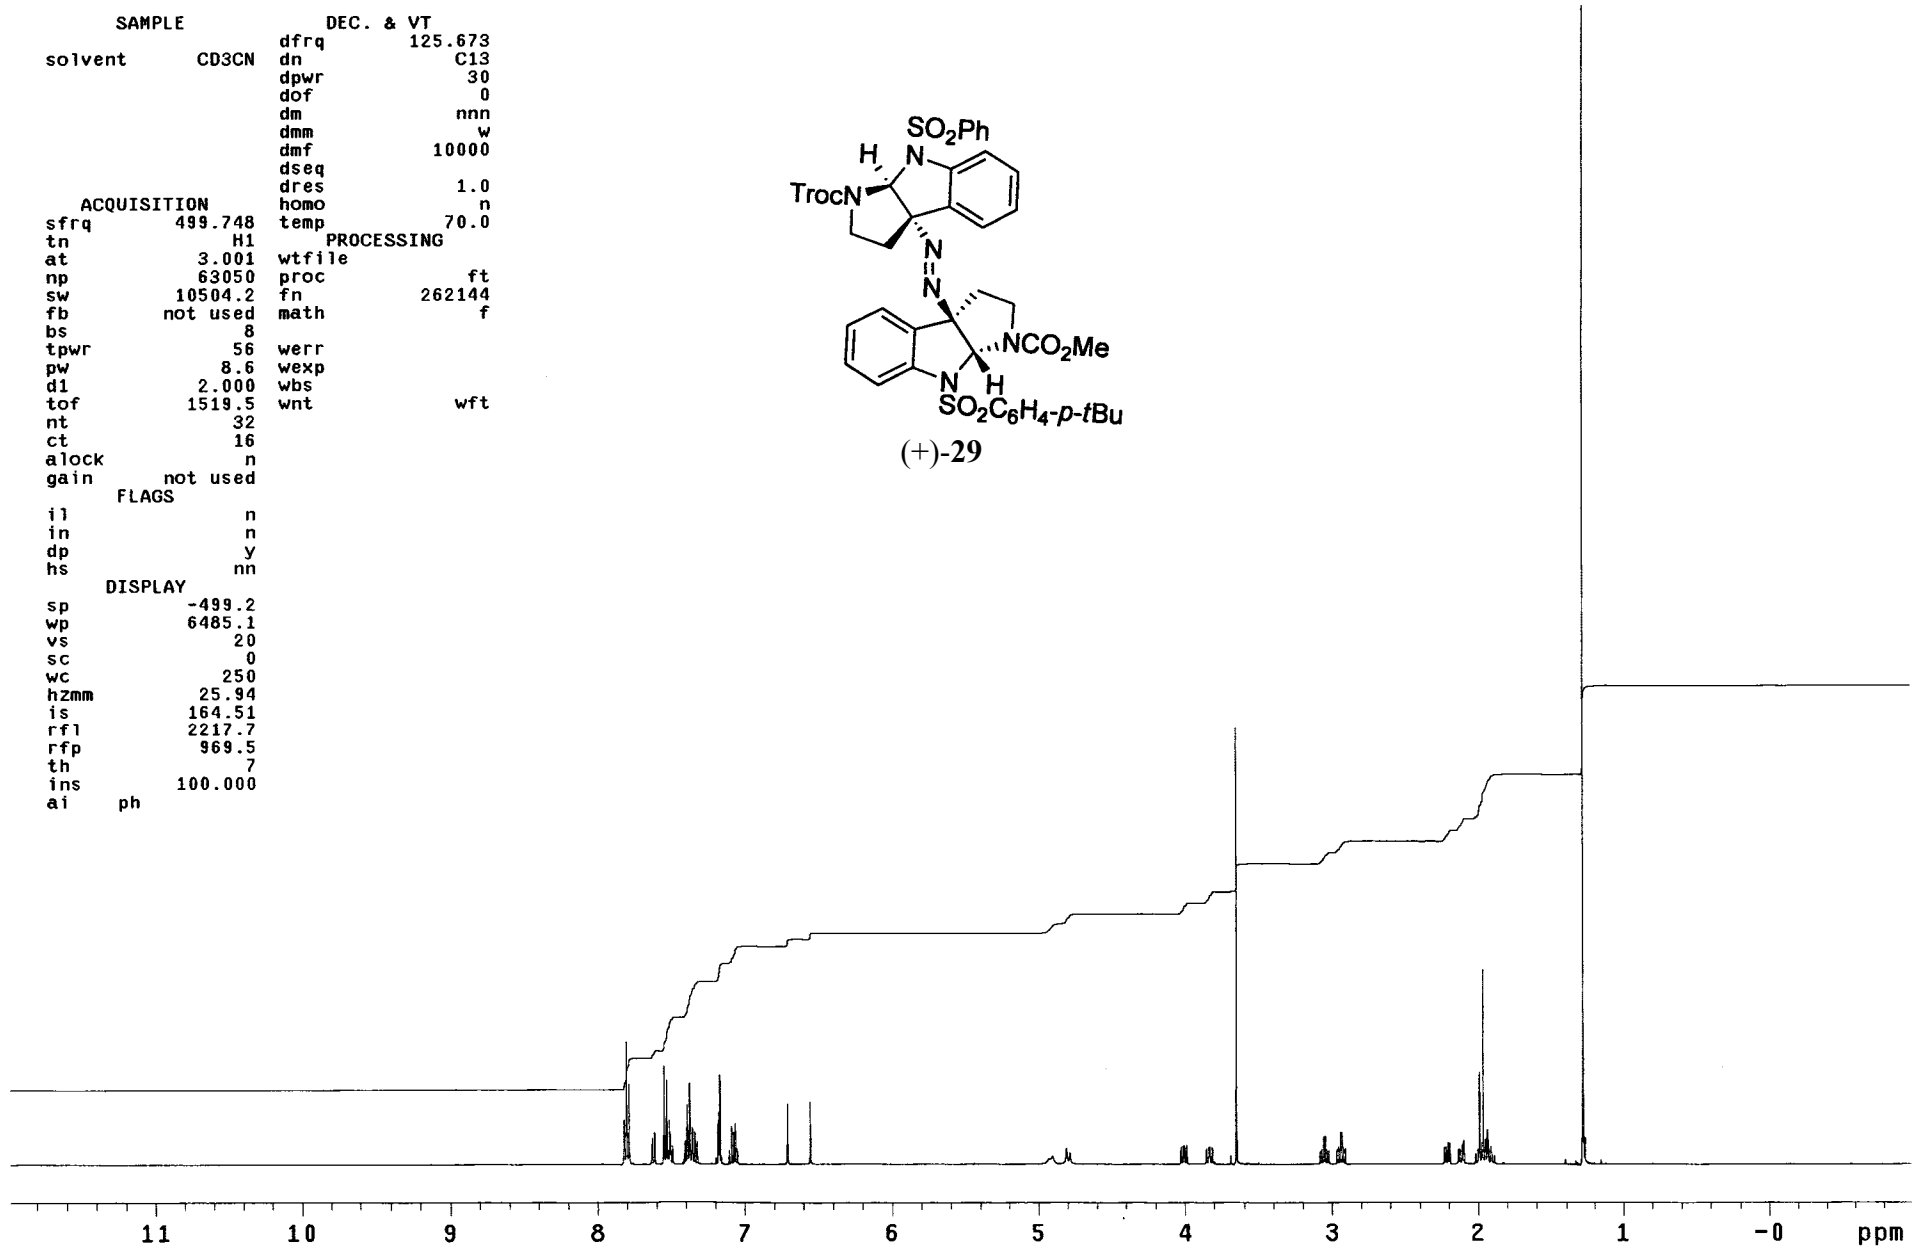

| SAMPLE      |          | DEC. & VT  |         |
|-------------|----------|------------|---------|
| solvent     | CD3CN    | dfrq       | 500.232 |
|             |          | dn         | H1      |
|             |          | dpwr       | 38      |
|             |          | dof        | -500.0  |
|             |          | dm         | y       |
|             |          | dmm        | w       |
|             |          | dmf        | 10700   |
|             |          | dseq       |         |
|             |          | dres       | 1.0     |
|             |          | homo       | n       |
|             |          | temp       | 70.0    |
| ACQUISITION |          | PROCESSING |         |
| sfrq        | 125.795  | lb         | 0.30    |
| tn          | C13      | wtfile     |         |
| at          | 1.736    | proc       | ft      |
| np          | 131010   | fn         | 131072  |
| sw          | 37735.8  | math       | f       |
| fb          | not used |            |         |
| bs          | 32       |            |         |
| ss          | 1        |            |         |
| tpwr        | 59       | werr       |         |
| pw          | 6.9      | wexp       |         |
| d1          | 0.763    | wbs        |         |
| tof         | 631.4    | wnt        |         |
| nt          | 20000    |            |         |
| ct          | 19200    |            |         |
| alock       | n        |            |         |
| gain        | not used |            |         |
| FLAGS       |          |            |         |
| il          | n        |            |         |
| in          | n        |            |         |
| dp          | y        |            |         |
| hs          | nn       |            |         |
| DISPLAY     |          |            |         |
| sp          | -2540.2  |            |         |
| wp          | 30220.5  |            |         |
| vs          | 290      |            |         |
| sc          | 0        |            |         |
| wc          | 250      |            |         |
| hzmm        | 120.88   |            |         |
| is          | 500.00   |            |         |
| rfl         | 21013.4  |            |         |
| rfp         | 14929.1  |            |         |
| th          | 3        |            |         |
| ins         | 1.000    |            |         |
| ai          | ph       |            |         |

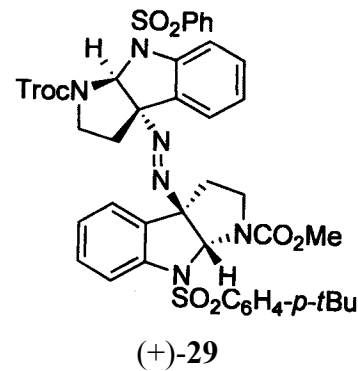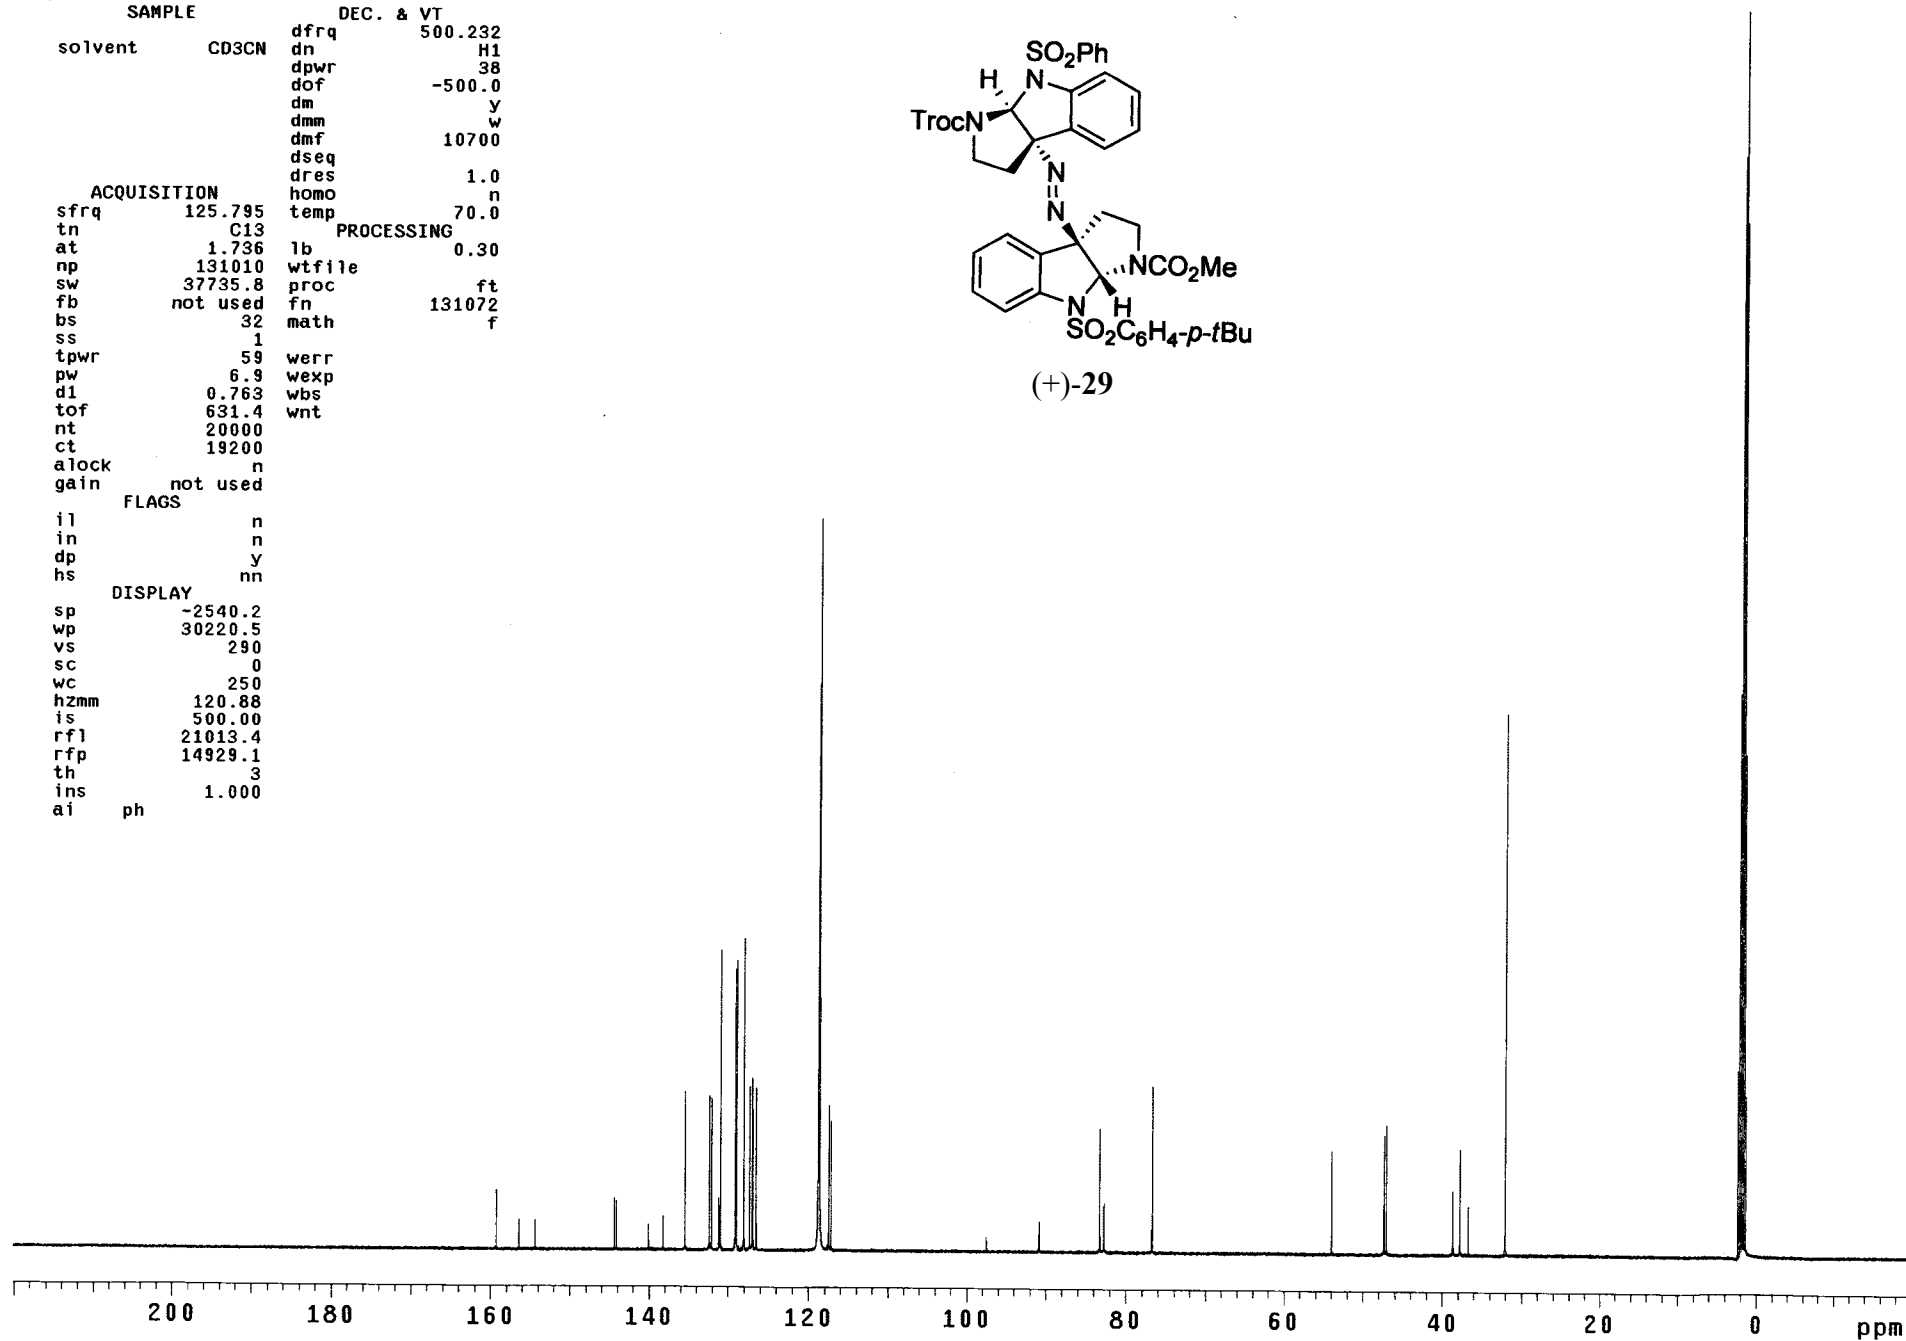

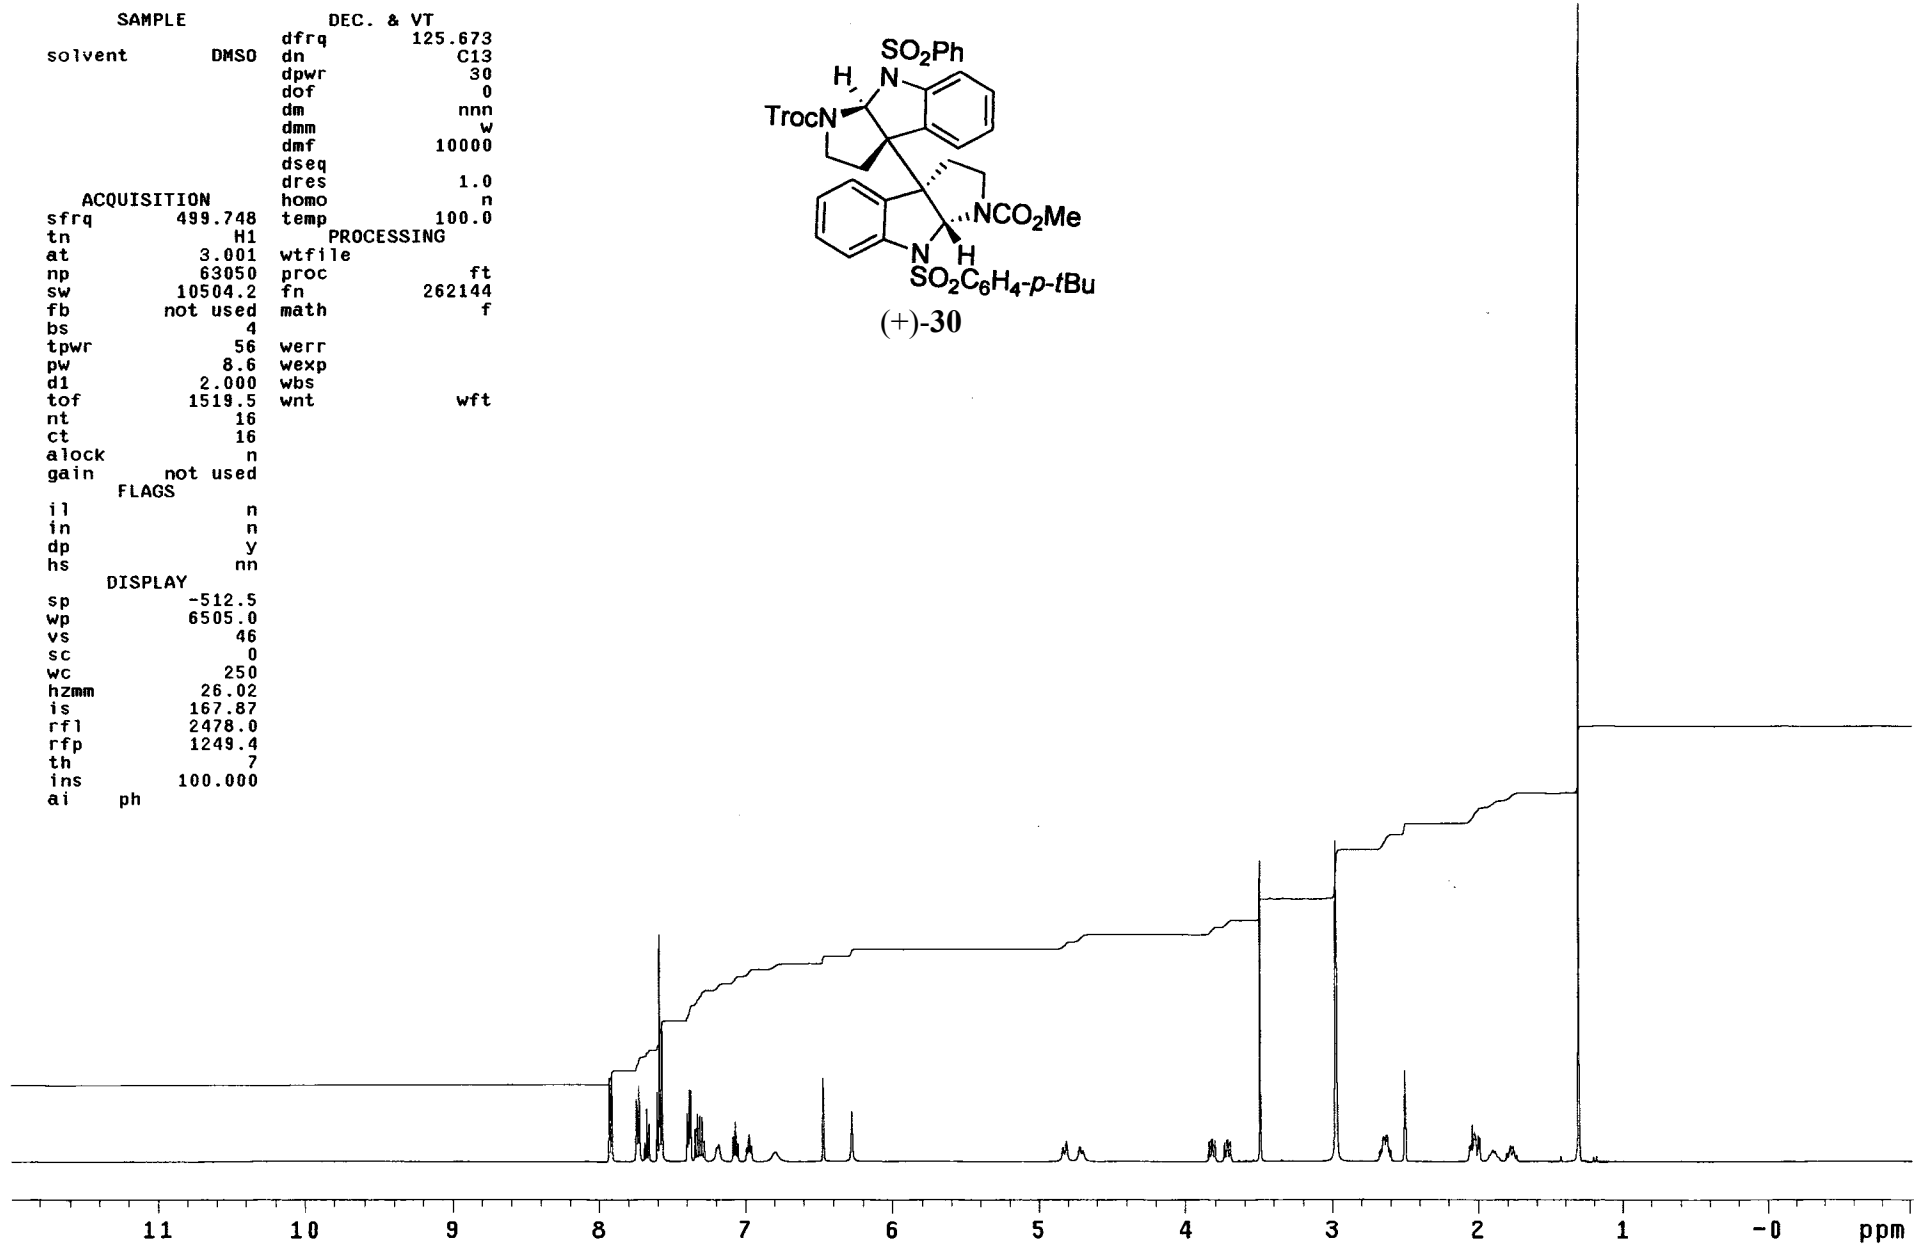

|             |          |            |         |
|-------------|----------|------------|---------|
| SAMPLE      |          | DEC. & VT  |         |
| solvent     | DMSO     | dfrq       | 500.232 |
|             |          | dn         | H1      |
|             |          | dpwr       | 38      |
|             |          | dof        | -500.0  |
|             |          | dm         | y       |
|             |          | dmm        | w       |
|             |          | dmf        | 10700   |
|             |          | dseq       |         |
|             |          | dres       | 1.0     |
|             |          | homo       | n       |
|             |          | temp       | 100.0   |
| ACQUISITION |          | PROCESSING |         |
| sfrq        | 125.795  | lb         | 0.30    |
| tn          | C13      | wtfile     |         |
| at          | 1.736    | proc       | ft      |
| np          | 131010   | fn         | 131072  |
| sw          | 37735.8  | math       | f       |
| fb          | not used |            |         |
| bs          | 32       |            |         |
| ss          | 1        |            |         |
| tpwr        | 59       | werr       |         |
| pw          | 6.9      | wexp       |         |
| d1          | 0.763    | wbs        |         |
| tof         | 631.4    | wnt        |         |
| nt          | 30000    |            |         |
| ct          | 17888    |            |         |
| alock       | n        |            |         |
| gain        | not used |            |         |
| FLAGS       |          |            |         |
| il          | n        |            |         |
| in          | n        |            |         |
| dp          | y        |            |         |
| hs          | nn       |            |         |
| DISPLAY     |          |            |         |
| sp          | -2533.0  |            |         |
| wp          | 30211.8  |            |         |
| vs          | 1060     |            |         |
| sc          | 0        |            |         |
| wc          | 250      |            |         |
| hzmm        | 120.85   |            |         |
| is          | 500.00   |            |         |
| rfl         | 11414.2  |            |         |
| rfp         | 4969.7   |            |         |
| th          | 20       |            |         |
| ins         | 1.000    |            |         |
| ai          | ph       |            |         |

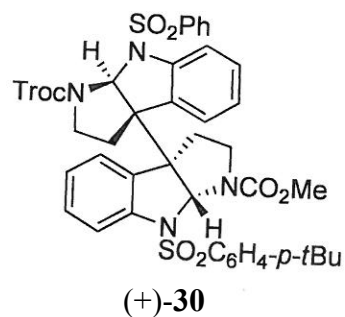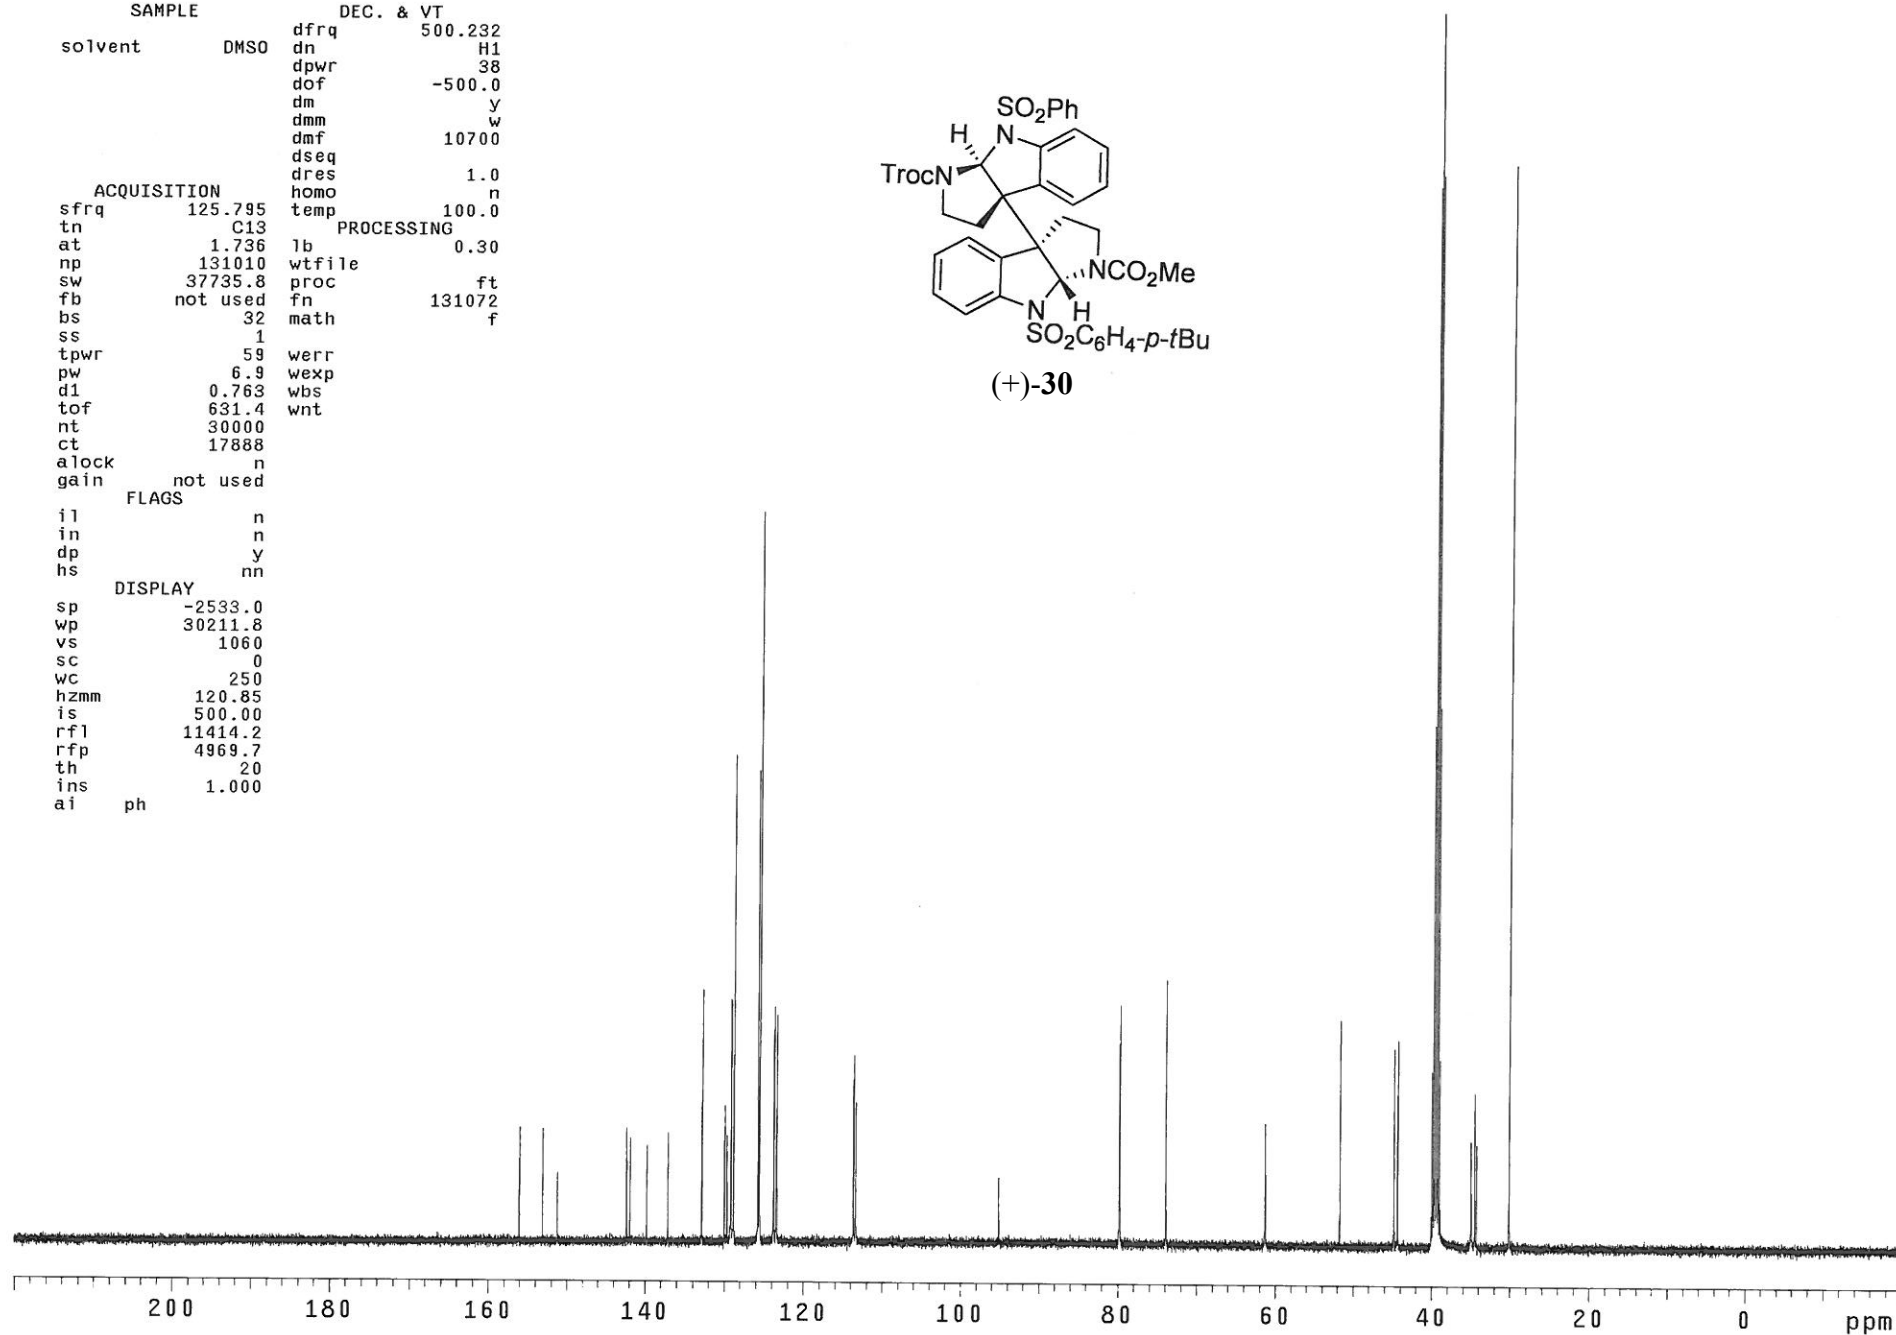

| SAMPLE      |          | DEC. & VT  |         |
|-------------|----------|------------|---------|
| solvent     | CD3CN    | dfrq       | 125.673 |
|             |          | dn         | C13     |
|             |          | dpwr       | 30      |
|             |          | dof        | 0       |
|             |          | dm         | nnn     |
|             |          | dmm        | w       |
|             |          | dmf        | 10000   |
|             |          | dseq       |         |
|             |          | dres       | 1.0     |
|             |          | homo       | n       |
|             |          | temp       | 70.0    |
| ACQUISITION |          | PROCESSING |         |
| sfrq        | 499.748  | wtfile     |         |
| tn          | H1       | proc       | ft      |
| at          | 3.001    | fn         | 262144  |
| np          | 63050    | math       | f       |
| sw          | 10504.2  |            |         |
| fb          | not used |            |         |
| bs          | 8        |            |         |
| tpwr        | 56       | werr       |         |
| pw          | 8.6      | wexp       |         |
| d1          | 2.000    | wbs        |         |
| tof         | 1519.5   | wnt        | wft     |
| nt          | 32       |            |         |
| ct          | 24       |            |         |
| alock       | n        |            |         |
| gain        | not used |            |         |
| FLAGS       |          |            |         |
| il          | n        |            |         |
| in          | n        |            |         |
| dp          | y        |            |         |
| hs          | nn       |            |         |
| DISPLAY     |          |            |         |
| sp          | -515.8   |            |         |
| wp          | 6500.6   |            |         |
| vs          | 55       |            |         |
| sc          | 0        |            |         |
| wc          | 250      |            |         |
| hzmm        | 26.00    |            |         |
| is          | 171.22   |            |         |
| rfl         | 2218.7   |            |         |
| rfp         | 969.5    |            |         |
| th          | 7        |            |         |
| ins         | 100.000  |            |         |
| ai          | ph       |            |         |

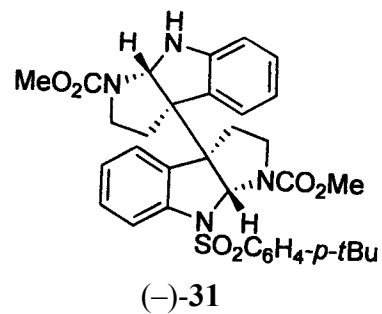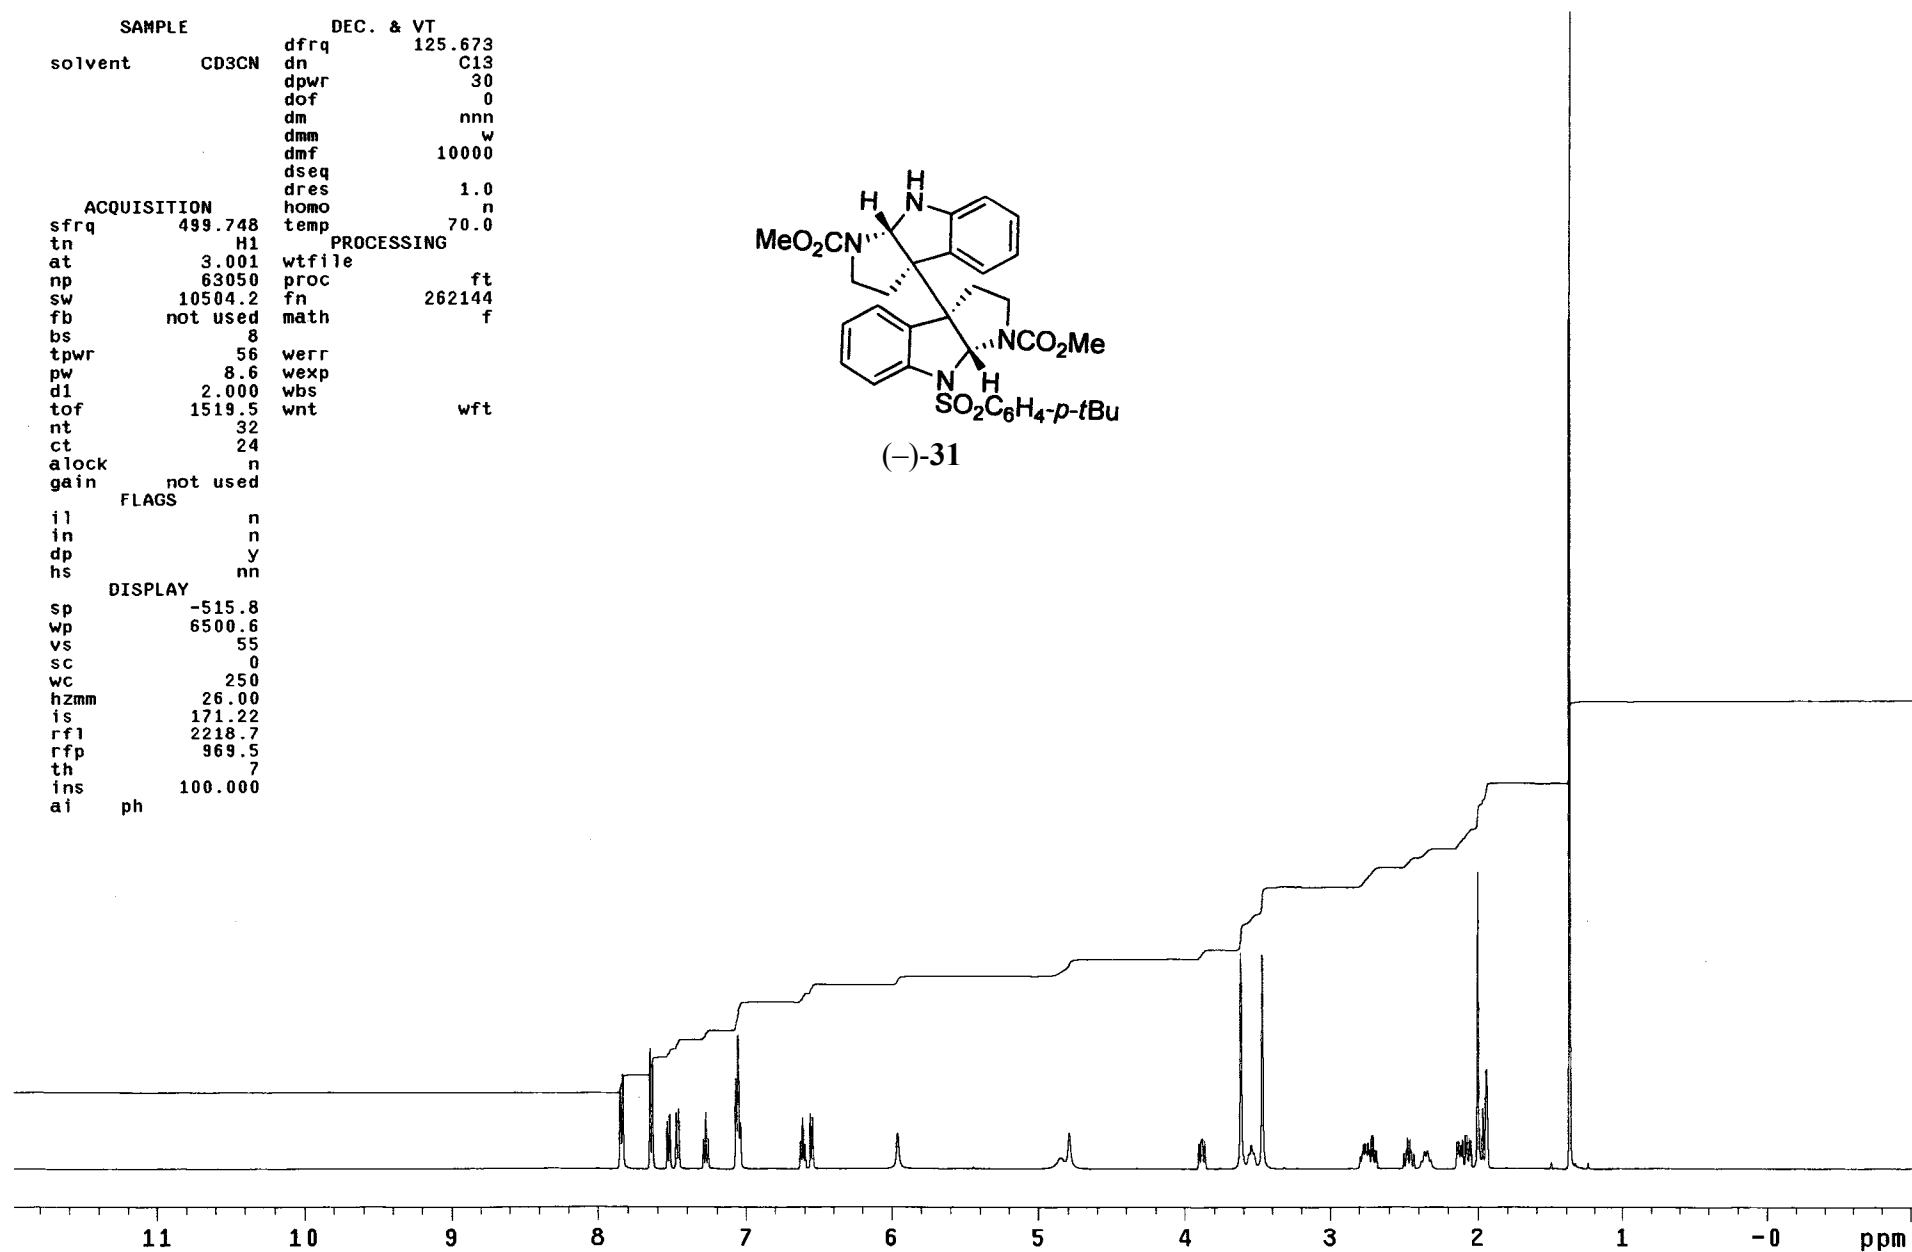



S121/S153

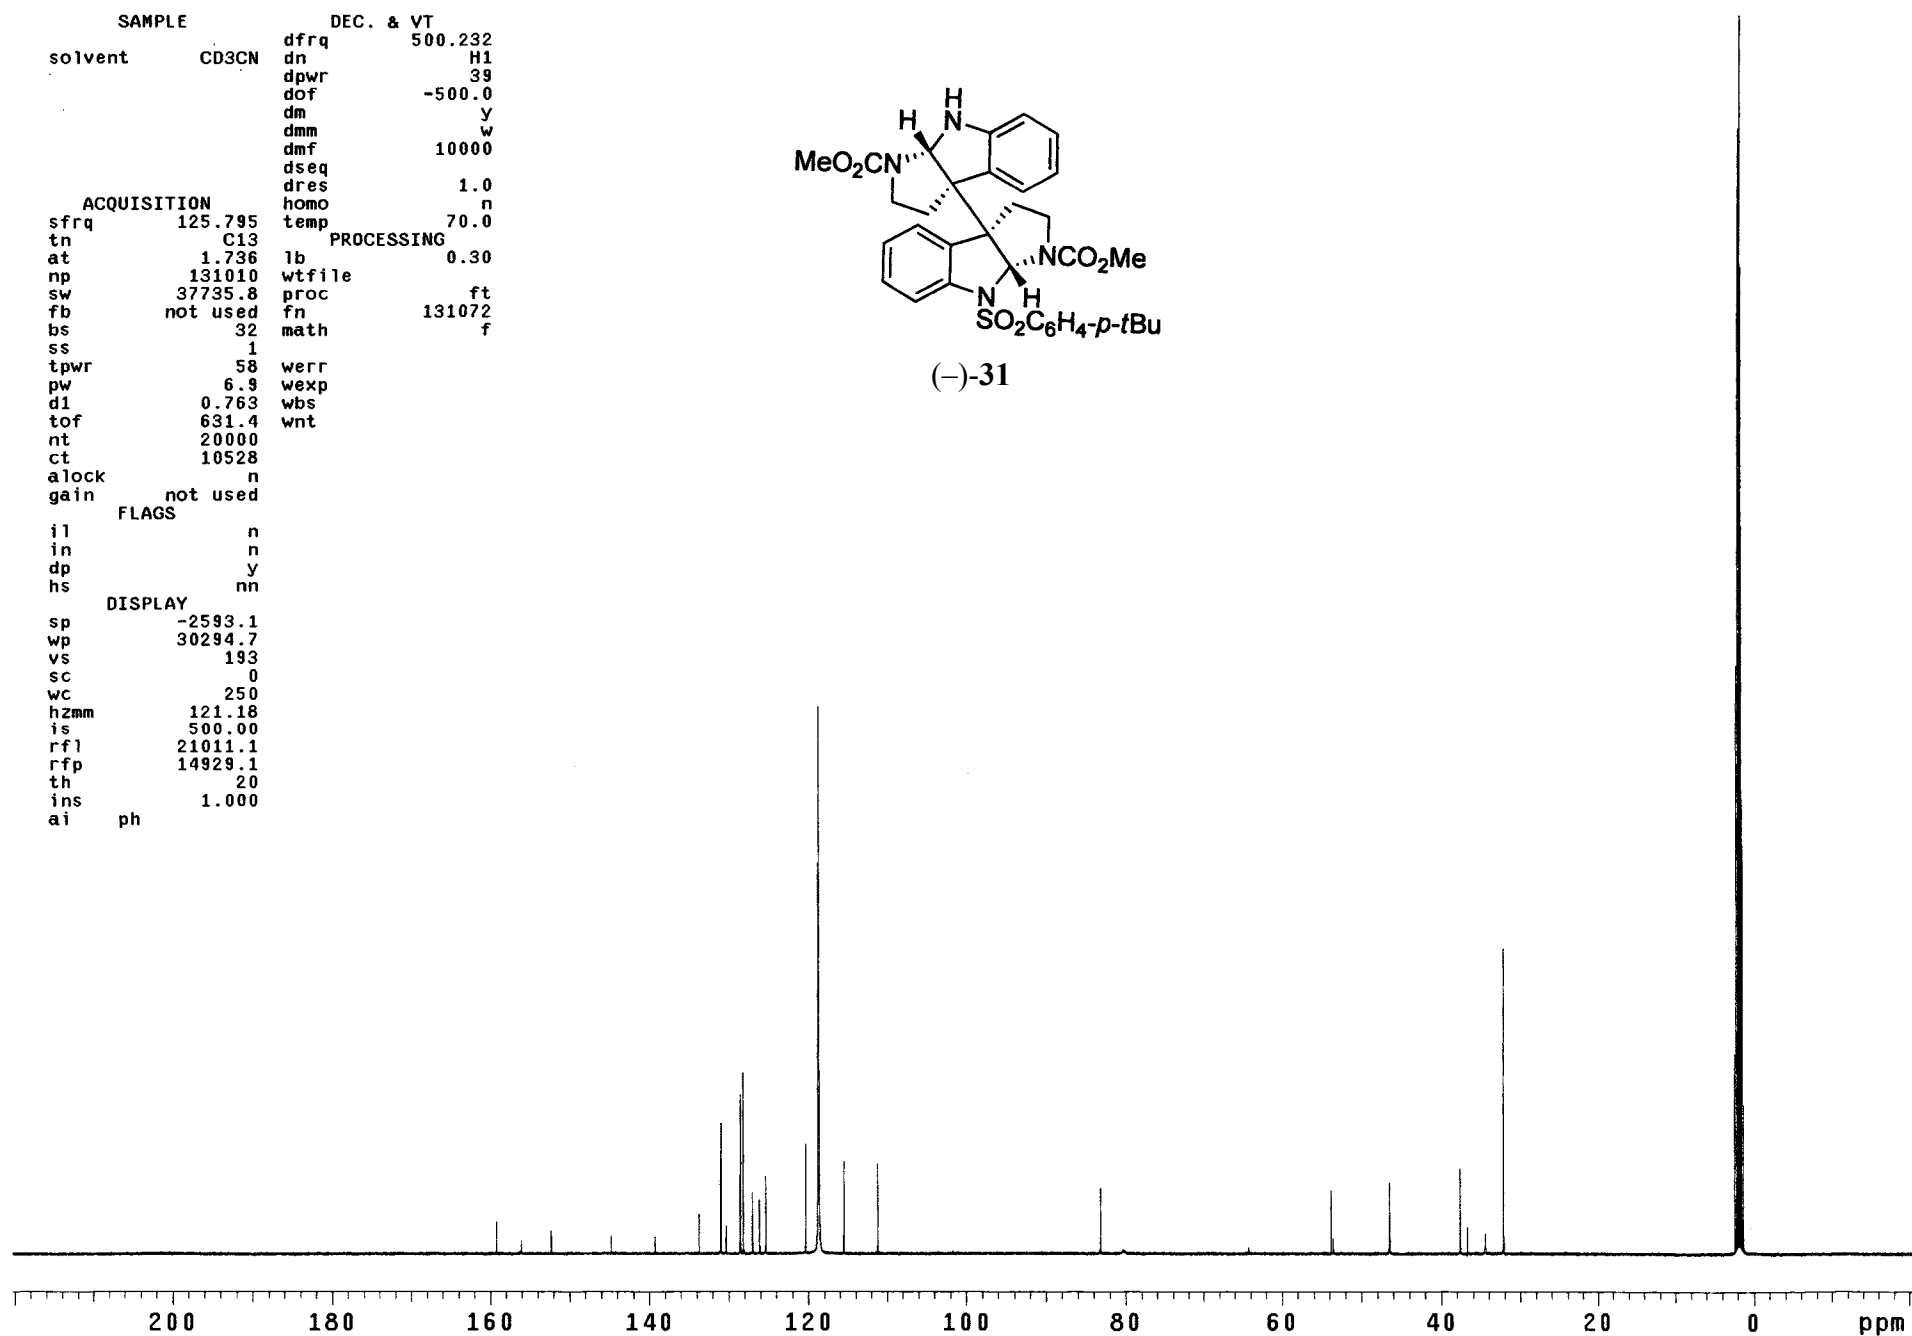

|             |          |            |         |
|-------------|----------|------------|---------|
| SAMPLE      |          | DEC. & VT  |         |
| solvent     | CD3CN    | dfrq       | 125.673 |
|             |          | dn         | C13     |
|             |          | dpwr       | 30      |
|             |          | dof        | 0       |
|             |          | dm         | nnn     |
|             |          | dmm        | w       |
|             |          | dmf        | 10000   |
|             |          | dseq       |         |
|             |          | dres       | 1.0     |
|             |          | homo       | n       |
|             |          | temp       | 70.0    |
| ACQUISITION |          | PROCESSING |         |
| sfrq        | 499.748  | wtfile     | ft      |
| tn          | H1       | proc       | 262144  |
| at          | 3.001    | fn         | f       |
| np          | 63050    | math       |         |
| sw          | 10504.2  |            |         |
| fb          | not used |            |         |
| bs          | 4        |            |         |
| tpwr        | 56       | werr       |         |
| pw          | 8.6      | wexp       |         |
| d1          | 2.000    | wbs        |         |
| tof         | 1519.5   | wnt        | wft     |
| nt          | 16       |            |         |
| ct          | 16       |            |         |
| alock       | n        |            |         |
| gain        | not used |            |         |
| FLAGS       |          |            |         |
| il          | n        |            |         |
| in          | n        |            |         |
| dp          | y        |            |         |
| hs          | nn       |            |         |
| DISPLAY     |          |            |         |
| sp          | -496.1   |            |         |
| wp          | 6490.7   |            |         |
| vs          | 75       |            |         |
| sc          | 0        |            |         |
| wc          | 250      |            |         |
| hzmm        | 25.96    |            |         |
| is          | 142.12   |            |         |
| rfl         | 2218.8   |            |         |
| rfp         | 969.5    |            |         |
| th          | 7        |            |         |
| ins         | 100.000  |            |         |
| ai          | ph       |            |         |

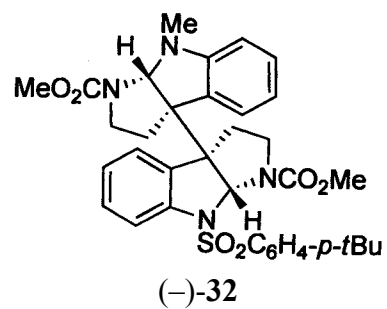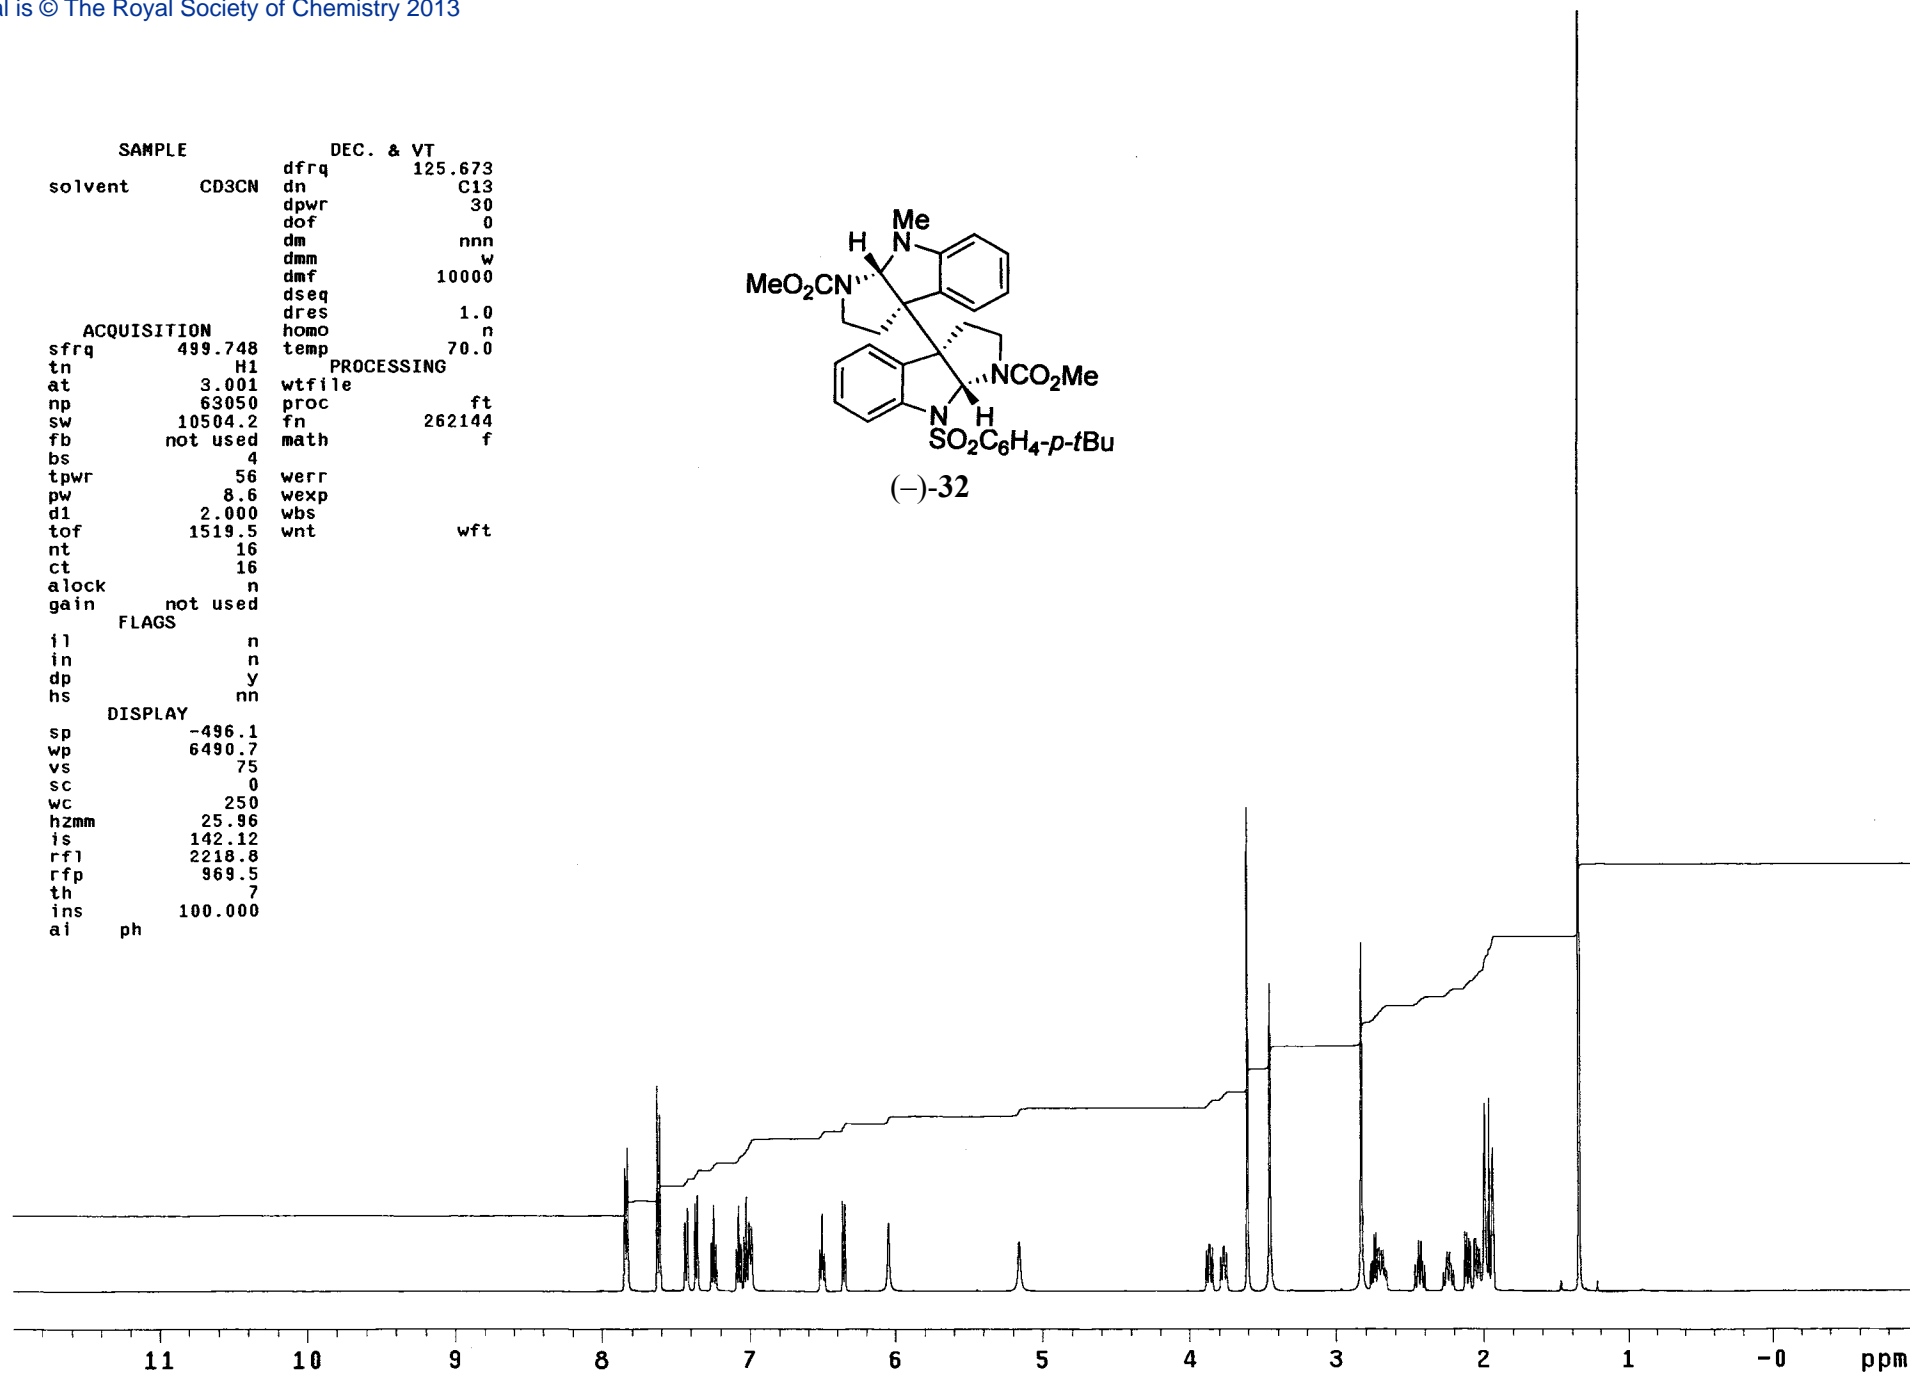

| SAMPLE      |          | DEC. & VT  |         |
|-------------|----------|------------|---------|
| solvent     | CD3CN    | dfrq       | 500.232 |
|             |          | dn         | H1      |
|             |          | dpwr       | 39      |
|             |          | dof        | -500.0  |
|             |          | dm         | y       |
|             |          | dmm        | w       |
|             |          | dmf        | 10000   |
|             |          | dseq       |         |
|             |          | dres       | 1.0     |
|             |          | homo       | n       |
|             |          | temp       | 70.0    |
| ACQUISITION |          | PROCESSING |         |
| sfrq        | 125.795  | lb         | 0.30    |
| tn          | C13      | wtfile     |         |
| at          | 1.736    | proc       | ft      |
| np          | 131010   | fn         | 131072  |
| sw          | 37735.8  | math       | f       |
| fb          | not used |            |         |
| bs          | 64       |            |         |
| ss          | 1        |            |         |
| tpwr        | 58       | werr       |         |
| pw          | 6.9      | wexp       |         |
| d1          | 0.763    | wbs        |         |
| tof         | 631.4    | wnt        |         |
| nt          | 20000    |            |         |
| ct          | 18880    |            |         |
| alock       | n        |            |         |
| gain        | not used |            |         |
| FLAGS       |          |            |         |
| il          | n        |            |         |
| in          | n        |            |         |
| dp          | y        |            |         |
| hs          | nn       |            |         |
| DISPLAY     |          |            |         |
| sp          | -2560.9  |            |         |
| wp          | 30234.3  |            |         |
| vs          | 801      |            |         |
| sc          | 0        |            |         |
| wc          | 250      |            |         |
| hzmm        | 120.94   |            |         |
| is          | 500.00   |            |         |
| rfl         | 21010.5  |            |         |
| rfp         | 14929.1  |            |         |
| th          | 20       |            |         |
| ins         | 1.000    |            |         |
| ai          | ph       |            |         |

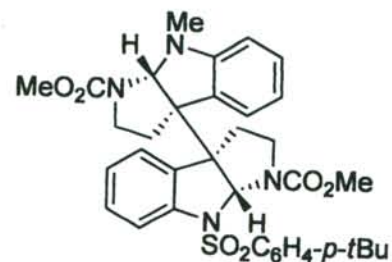

(-)-32

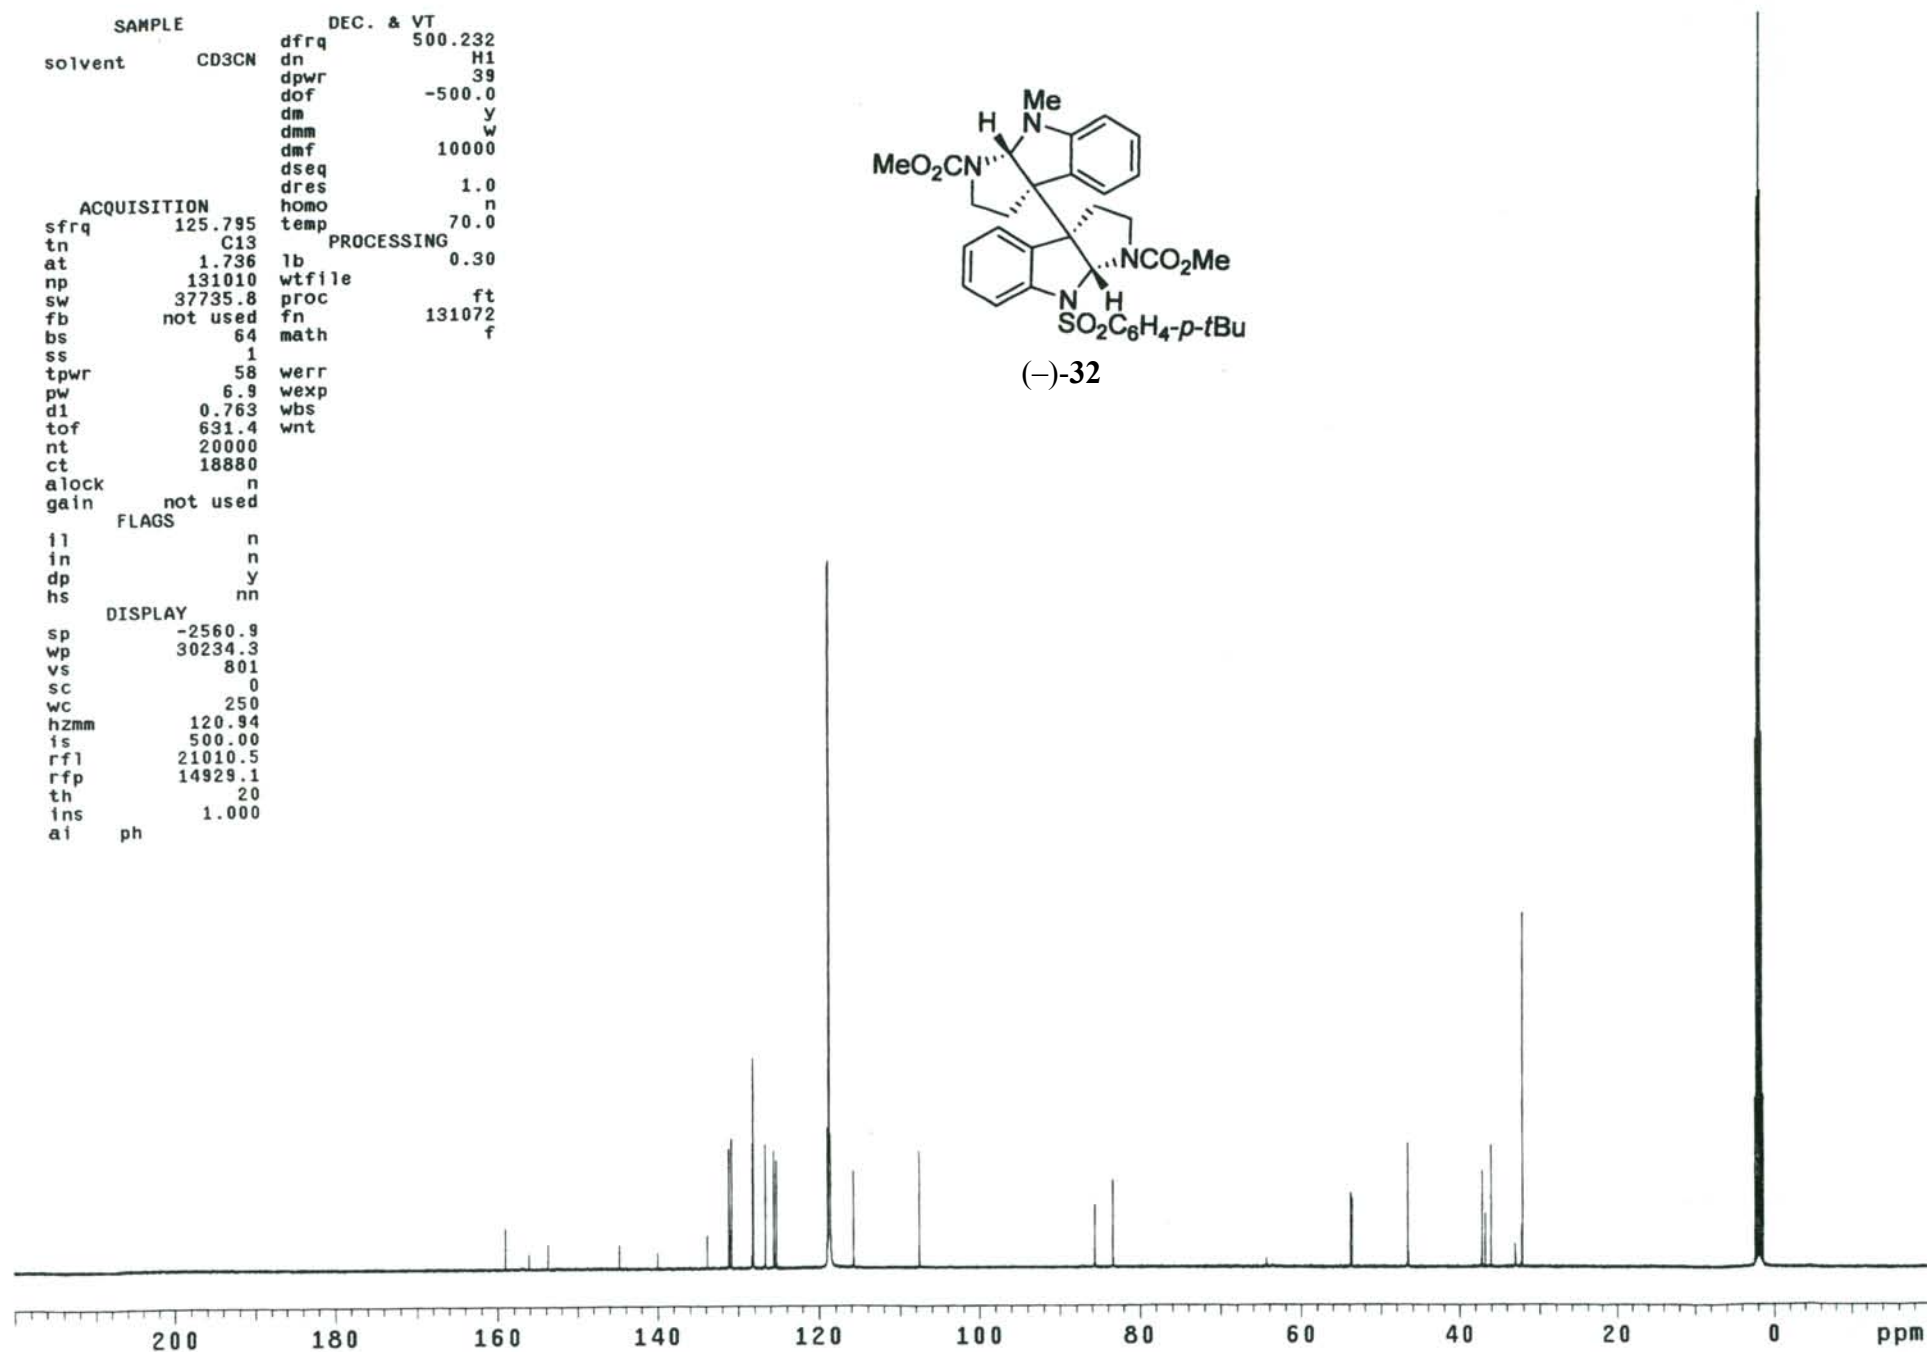

| SAMPLE      |          | DEC. & VT  |         |
|-------------|----------|------------|---------|
| solvent     | CD3CN    | dfrq       | 125.673 |
|             |          | dn         | C13     |
|             |          | dpwr       | 30      |
|             |          | dof        | 0       |
|             |          | dm         | nnn     |
|             |          | dmm        | w       |
|             |          | dmf        | 10000   |
|             |          | dseq       |         |
|             |          | dres       | 1.0     |
|             |          | homo       | n       |
|             |          | temp       | 70.0    |
| ACQUISITION |          | PROCESSING |         |
| sfrq        | 499.748  | wtfile     |         |
| tn          | H1       | proc       | ft      |
| at          | 3.001    | fn         | 262144  |
| np          | 63050    | math       | f       |
| sw          | 10504.2  |            |         |
| fb          | not used |            |         |
| bs          | 4        |            |         |
| tpwr        | 56       | werr       |         |
| pw          | 8.6      | wexp       |         |
| d1          | 2.000    | wbs        |         |
| tof         | 1519.5   | wnt        | wft     |
| nt          | 16       |            |         |
| ct          | 16       |            |         |
| alock       | n        |            |         |
| gain        | not used |            |         |
| FLAGS       |          |            |         |
| il          | n        |            |         |
| in          | n        |            |         |
| dp          | y        |            |         |
| hs          | nn       |            |         |
| DISPLAY     |          |            |         |
| sp          | -498.0   |            |         |
| wp          | 6492.9   |            |         |
| vs          | 45       |            |         |
| sc          | 0        |            |         |
| wc          | 250      |            |         |
| hzmm        | 25.97    |            |         |
| is          | 152.95   |            |         |
| rfl         | 2218.5   |            |         |
| rfp         | 969.5    |            |         |
| th          | 7        |            |         |
| ins         | 100.000  |            |         |
| ai          | ph       |            |         |

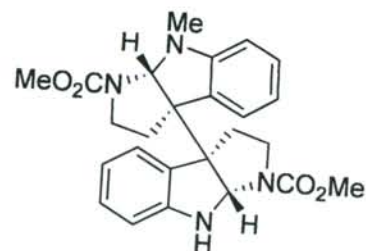

(-)-33

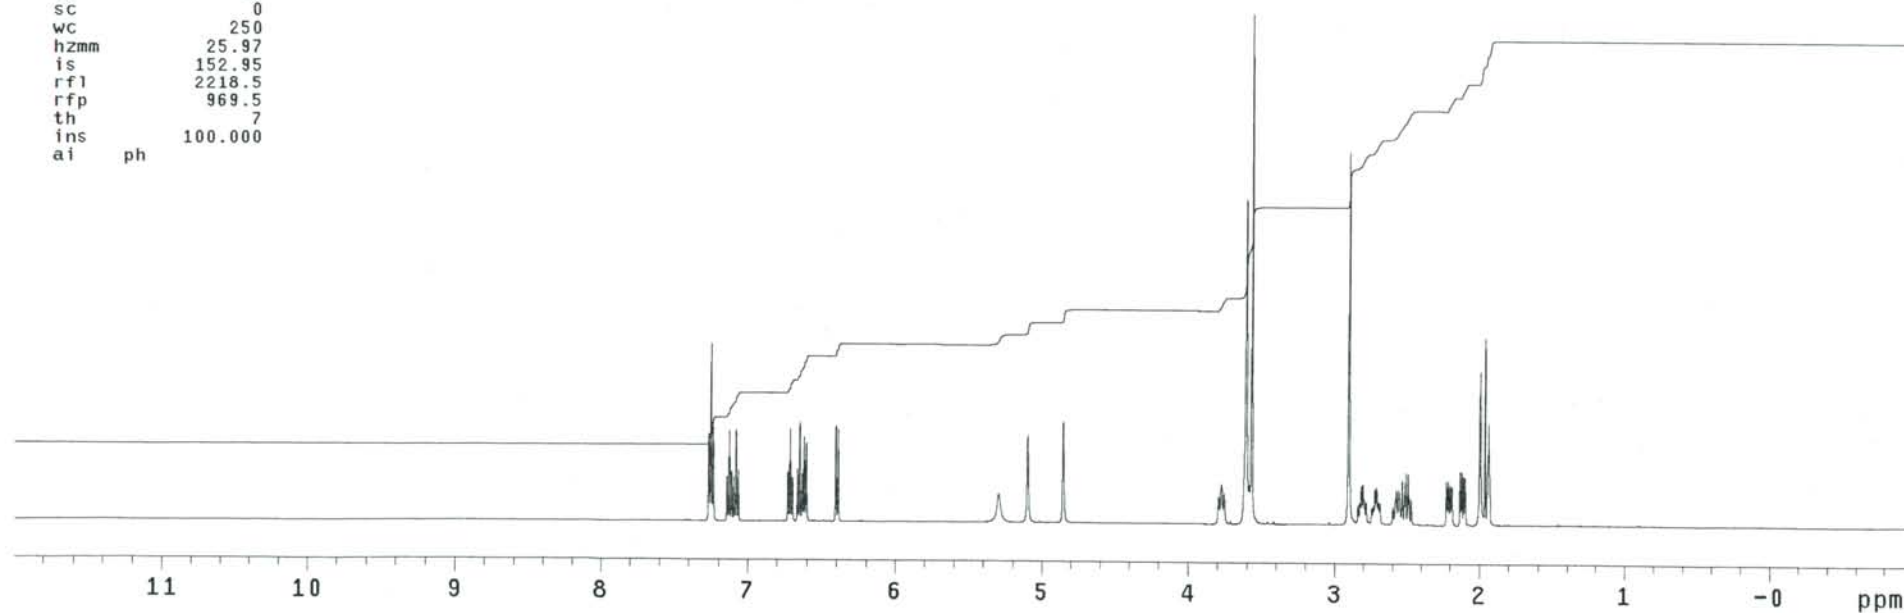

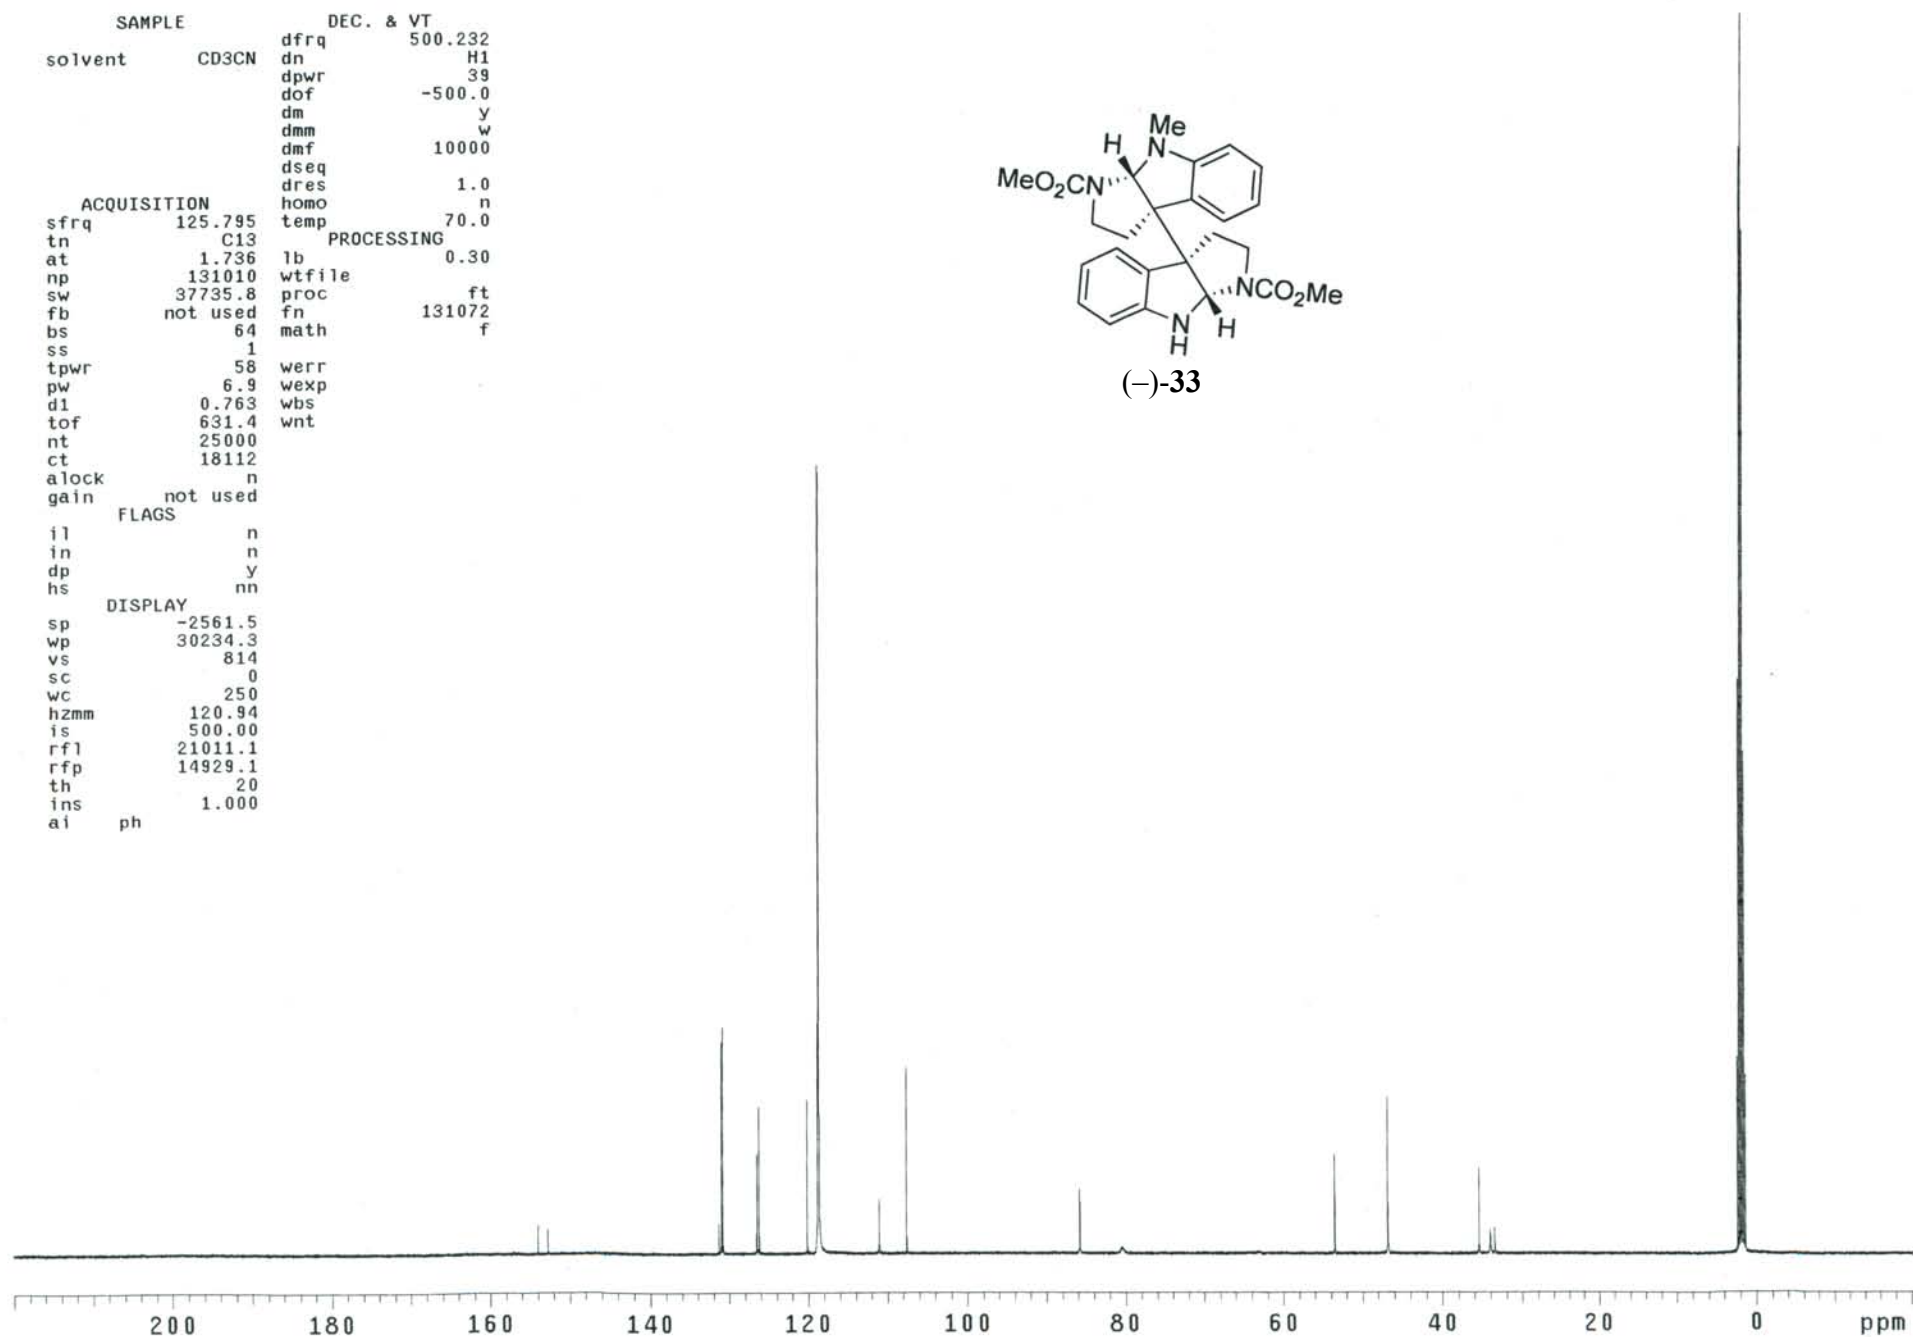

| SAMPLE      |          | DEC. & VT  |         |
|-------------|----------|------------|---------|
| solvent     | CDC13    | dfrq       | 125.672 |
|             |          | dn         | C13     |
|             |          | dpwr       | 30      |
|             |          | dof        | 0       |
|             |          | dm         | nnn     |
|             |          | dmm        | w       |
|             |          | dmf        | 10000   |
| ACQUISITION |          | dseq       |         |
| sfrq        | 499.746  | dres       | 1.0     |
| tn          | H1       | homo       | n       |
| at          | 3.001    | temp       | 50.0    |
| np          | 63050    | PROCESSING |         |
| sw          | 10504.2  | wtfile     |         |
| fb          | not used | proc       | ft      |
| bs          | 4        | fn         | 262144  |
| tpwr        | 56       | math       | f       |
| pw          | 8.6      |            |         |
| d1          | 2.000    | werr       |         |
| tof         | 1519.5   | wexp       |         |
| nt          | 16       | wbs        |         |
| ct          | 16       | wnt        | wft     |
| alock       | n        |            |         |
| gain        | not used |            |         |
| FLAGS       |          |            |         |
| il          | n        |            |         |
| in          | n        |            |         |
| dp          | y        |            |         |
| hs          | nn       |            |         |
| DISPLAY     |          |            |         |
| sp          | -509.4   |            |         |
| wp          | 6499.7   |            |         |
| vs          | 45       |            |         |
| sc          | 0        |            |         |
| wc          | 250      |            |         |
| hzmm        | 26.00    |            |         |
| is          | 218.23   |            |         |
| rfl         | 4864.9   |            |         |
| rfp         | 3618.1   |            |         |
| th          | 7        |            |         |
| ins         | 100.000  |            |         |
| ai          | ph       |            |         |

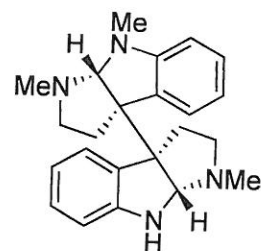

(-)-calycanthidine (**1**)

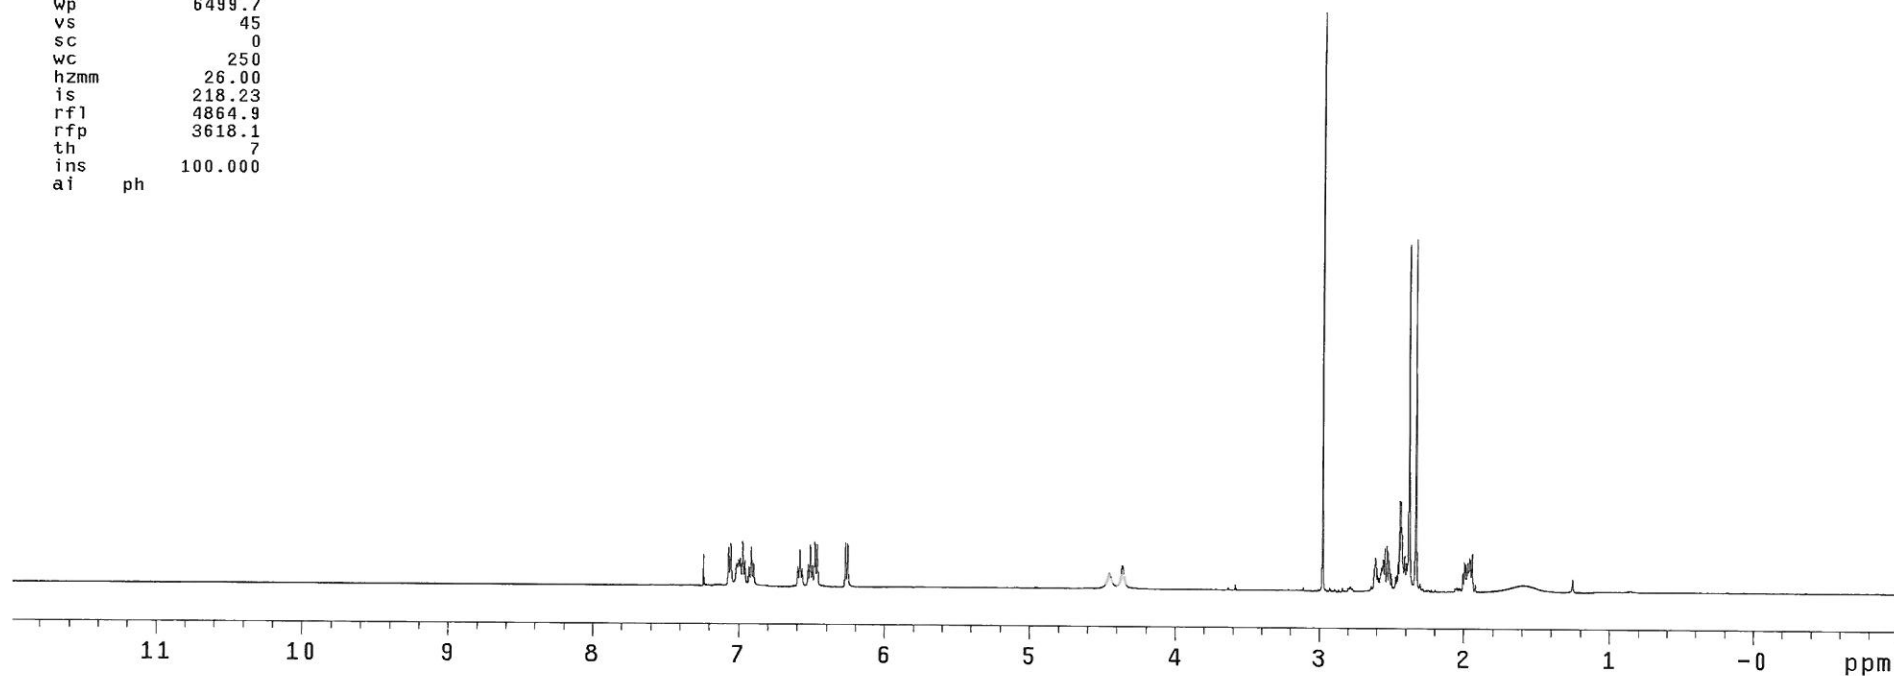

| SAMPLE      |          | DEC. & VT |         |
|-------------|----------|-----------|---------|
| solvent     | CDC13    | dfrq      | 500.229 |
|             |          | dn        | H1      |
|             |          | dpwr      | 39      |
|             |          | dof       | -500.0  |
|             |          | dm        | y       |
|             |          | dmm       | w       |
|             |          | dmf       | 10000   |
| ACQUISITION |          |           |         |
| sfrq        | 125.795  | dseq      |         |
| tn          | C13      | dres      | 1.0     |
| at          | 1.736    | homo      | n       |
| np          | 131010   | temp      | 50.0    |
| sw          | 37735.8  |           |         |
| fb          | not used | lb        | 0.30    |
| bs          | 64       | wtfile    |         |
| ss          | 1        | proc      | ft      |
| tpwr        | 58       | fn        | 131072  |
| pw          | 6.9      | math      | f       |
| d1          | 0.763    |           |         |
| tof         | 631.4    | werr      |         |
| nt          | 25000    | wexp      |         |
| ct          | 21696    | wbs       |         |
| alock       | n        | wnt       |         |
| gain        | not used |           |         |
| FLAGS       |          |           |         |
| il          | n        |           |         |
| in          | n        |           |         |
| dp          | y        |           |         |
| hs          | nn       |           |         |
| DISPLAY     |          |           |         |
| sp          | -2578.7  |           |         |
| wp          | 28957.7  |           |         |
| vs          | 2712     |           |         |
| sc          | 0        |           |         |
| wc          | 250      |           |         |
| hzmm        | 115.83   |           |         |
| is          | 500.00   |           |         |
| rfl         | 15988.9  |           |         |
| rfp         | 9714.2   |           |         |
| th          | 20       |           |         |
| ins         | 1.000    |           |         |
| ai          | ph       |           |         |

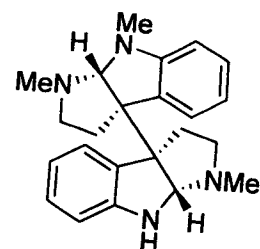

(-)-calycanthidine (1)

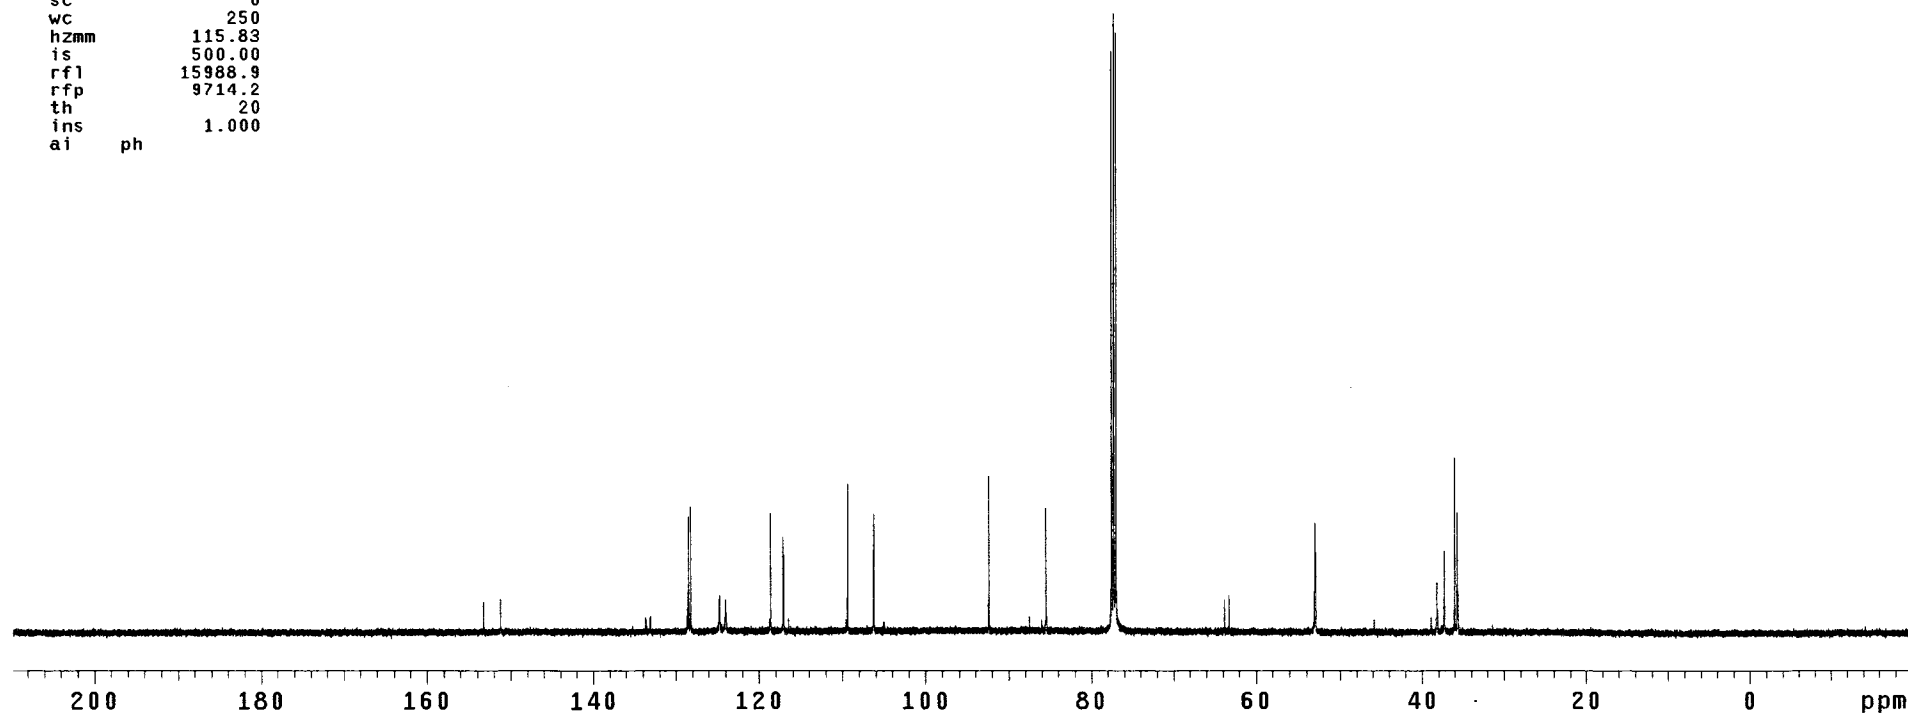

| SAMPLE      |          | DEC. & VT  |         |
|-------------|----------|------------|---------|
| solvent     | DMSO     | dfrq       | 125.673 |
|             |          | dn         | C13     |
|             |          | dpwr       | 30      |
|             |          | dof        | 0       |
|             |          | dm         | nnn     |
|             |          | dmm        | w       |
|             |          | dmf        | 10000   |
| ACQUISITION |          | PROCESSING |         |
| sfrq        | 499.748  | dseq       |         |
| tn          | H1       | dres       | 1.0     |
| at          | 3.001    | homo       | n       |
| np          | 63050    | temp       | 100.0   |
| sw          | 10504.2  |            |         |
| fb          | not used | wtfile     |         |
| bs          | 4        | proc       | ft      |
| tpwr        | 56       | fn         | 262144  |
| pw          | 8.6      | math       | f       |
| d1          | 2.000    |            |         |
| tof         | 1519.5   | werr       |         |
| nt          | 16       | wexp       |         |
| ct          | 16       | wbs        |         |
| alock       | n        | wnt        | wft     |
| gain        | not used |            |         |
| FLAGS       |          |            |         |
| il          | n        |            |         |
| in          | n        |            |         |
| dp          | y        |            |         |
| hs          | nn       |            |         |
| DISPLAY     |          |            |         |
| sp          | -505.7   |            |         |
| wp          | 6501.7   |            |         |
| vs          | 51       |            |         |
| sc          | 0        |            |         |
| wc          | 250      |            |         |
| hzmm        | 26.01    |            |         |
| is          | 109.11   |            |         |
| rfl         | 2478.4   |            |         |
| rpf         | 1249.4   |            |         |
| th          | 7        |            |         |
| ins         | 100.000  |            |         |
| ai          | ph       |            |         |

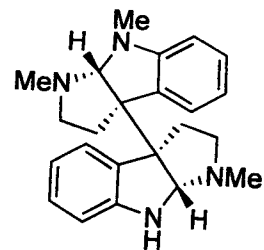

(-)-calycanthidine (1)

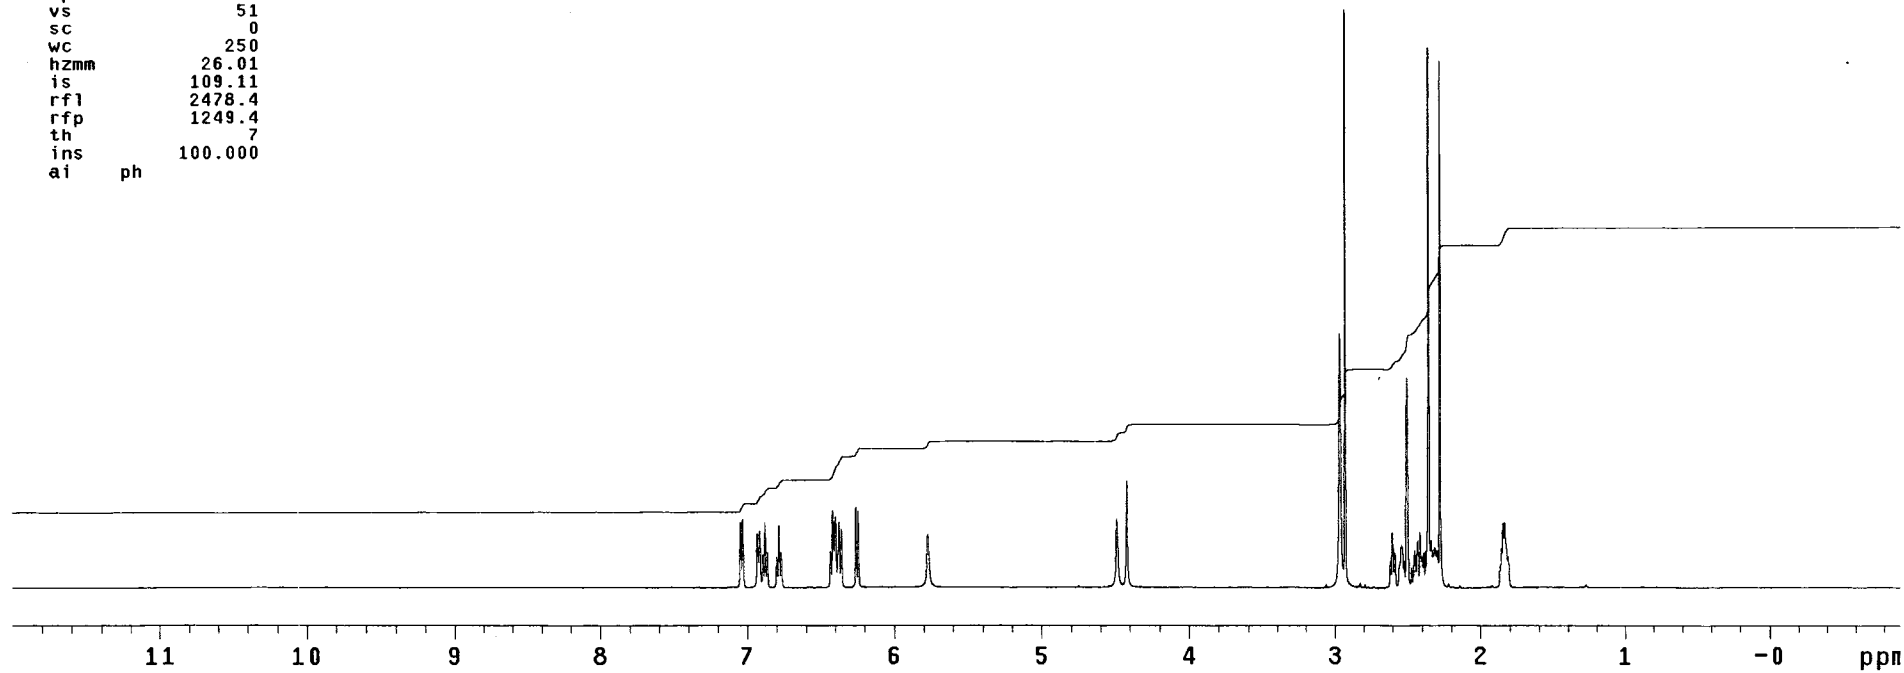



| SAMPLE      |          | DEC. & VT |         |
|-------------|----------|-----------|---------|
| solvent     | DMSO     | dfrq      | 500.232 |
|             |          | dn        | H1      |
|             |          | dpwr      | 39      |
|             |          | dof       | -500.0  |
|             |          | dm        | y       |
|             |          | dmm       | w       |
|             |          | dmf       | 10000   |
| ACQUISITION |          |           |         |
| sfrq        | 125.795  | dseq      |         |
| tn          | C13      | dres      | 1.0     |
| at          | 1.736    | homo      | n       |
| np          | 131010   | temp      | 100.0   |
| sw          | 37735.8  |           |         |
| fb          | not used | lb        | 0.30    |
| bs          | 64       | wtfile    |         |
| ss          | 1        | proc      | ft      |
| tpwr        | 58       | fn        | 131072  |
| pw          | 6.9      | math      | f       |
| d1          | 0.763    |           |         |
| tof         | 631.4    | werr      |         |
| nt          | 20000    | wexp      |         |
| ct          | 17280    | wbs       |         |
| alock       | n        | wnt       |         |
| gain        | not used |           |         |
| FLAGS       |          |           |         |
| il          | n        |           |         |
| in          | n        |           |         |
| dp          | y        |           |         |
| hs          | nn       |           |         |
| DISPLAY     |          |           |         |
| sp          | -2545.7  |           |         |
| wp          | 30228.5  |           |         |
| vs          | 1671     |           |         |
| sc          | 0        |           |         |
| wc          | 250      |           |         |
| hzmm        | 120.91   |           |         |
| is          | 500.00   |           |         |
| rfl         | 11413.6  |           |         |
| rfp         | 4969.7   |           |         |
| th          | 20       |           |         |
| ins         | 1.000    |           |         |
| ai          | ph       |           |         |

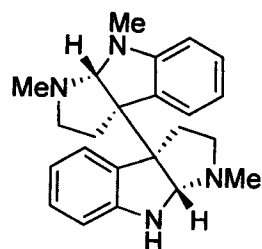

(-)-calycanthidine (1)

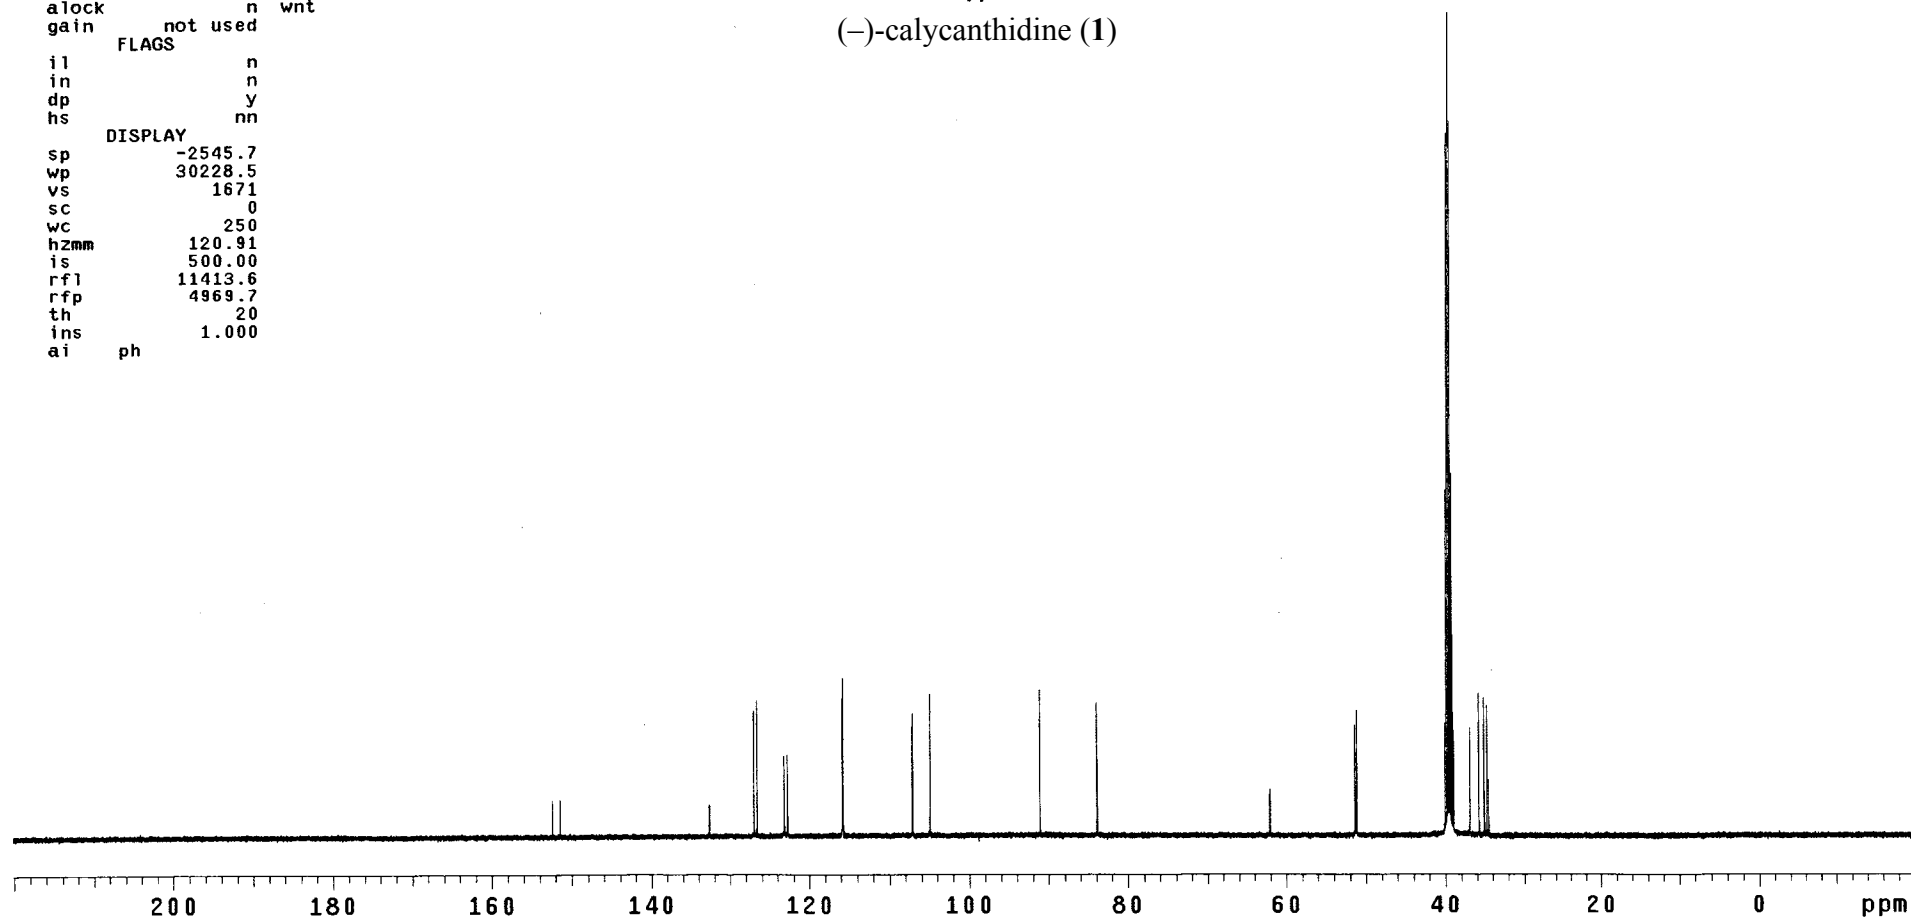

S130/S153

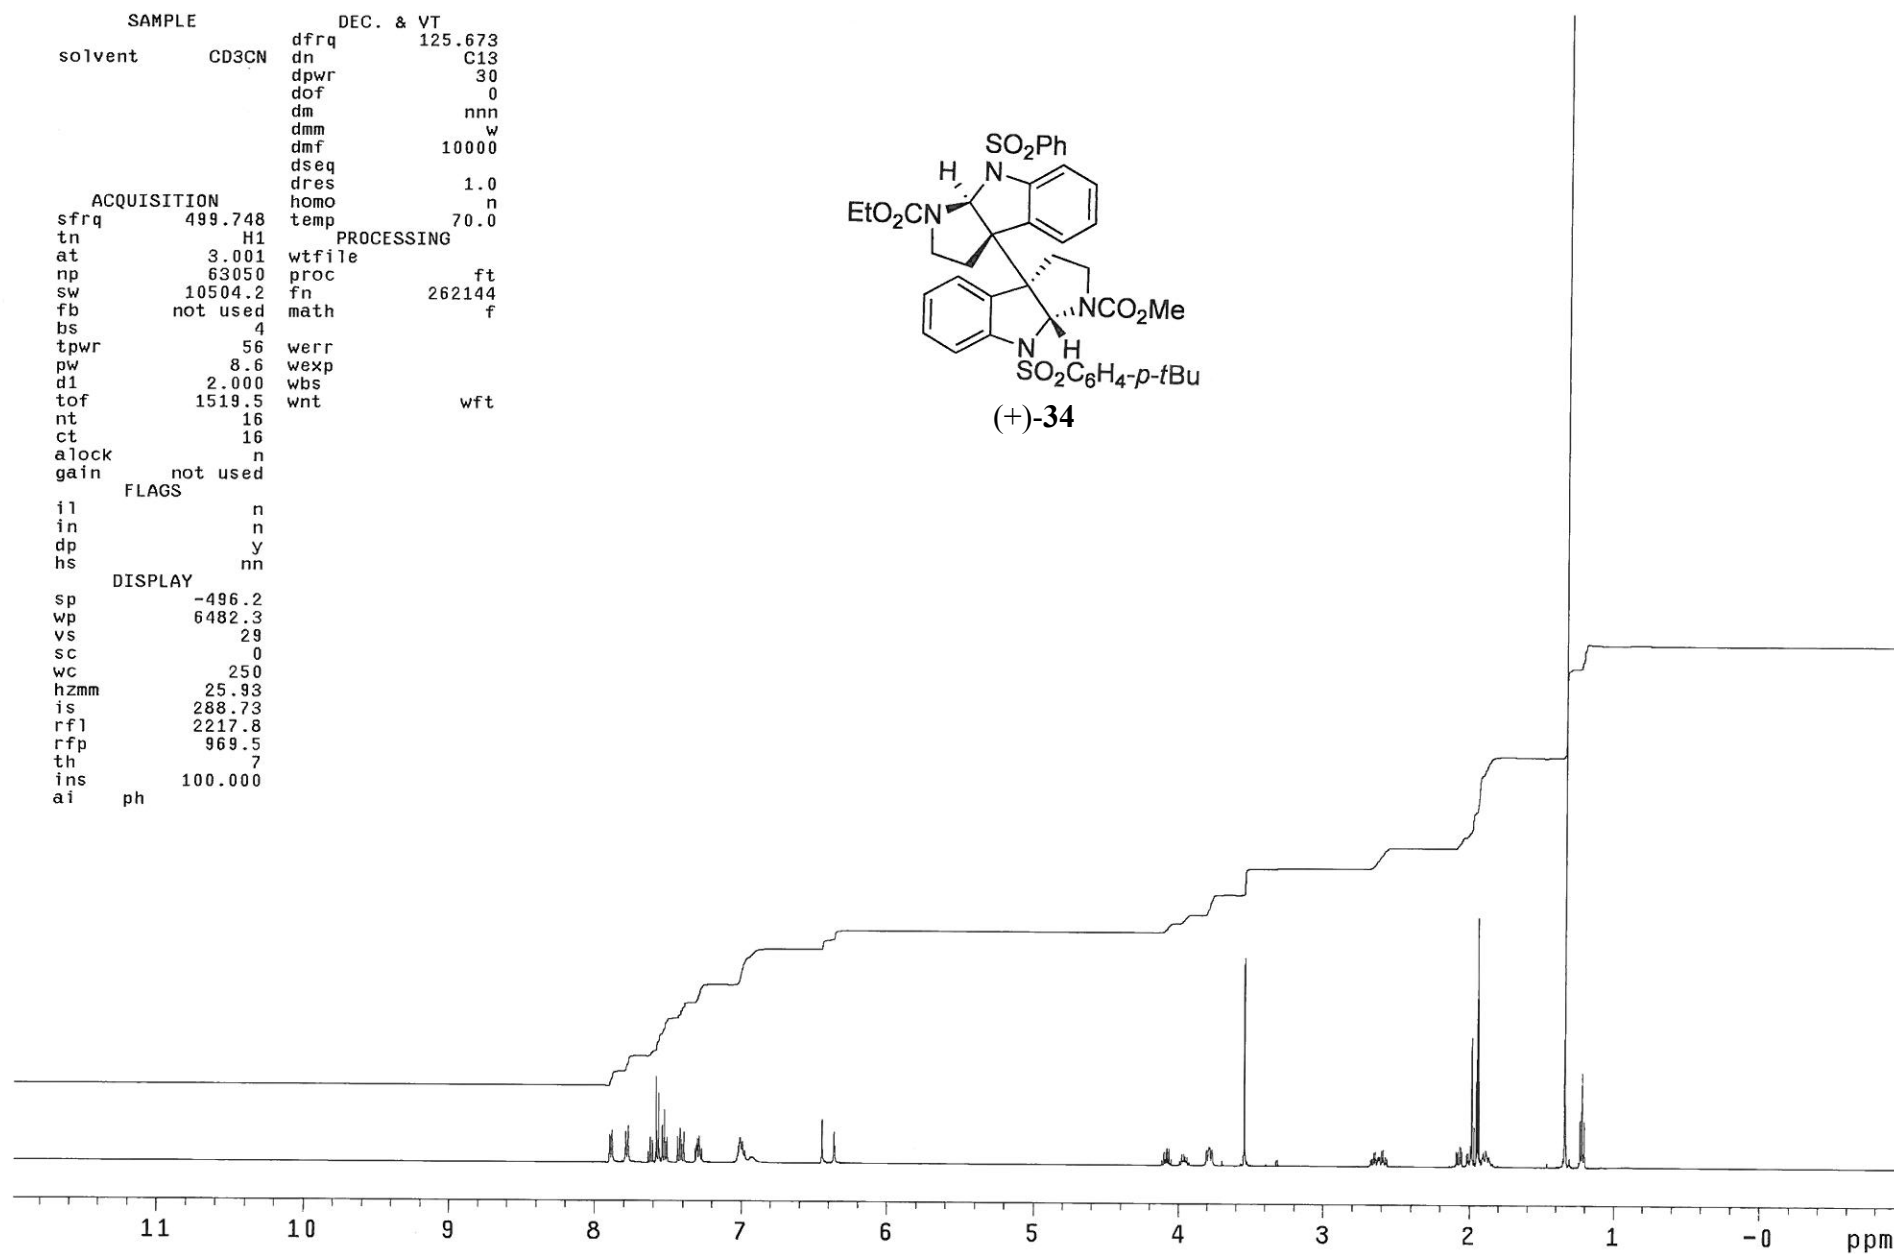

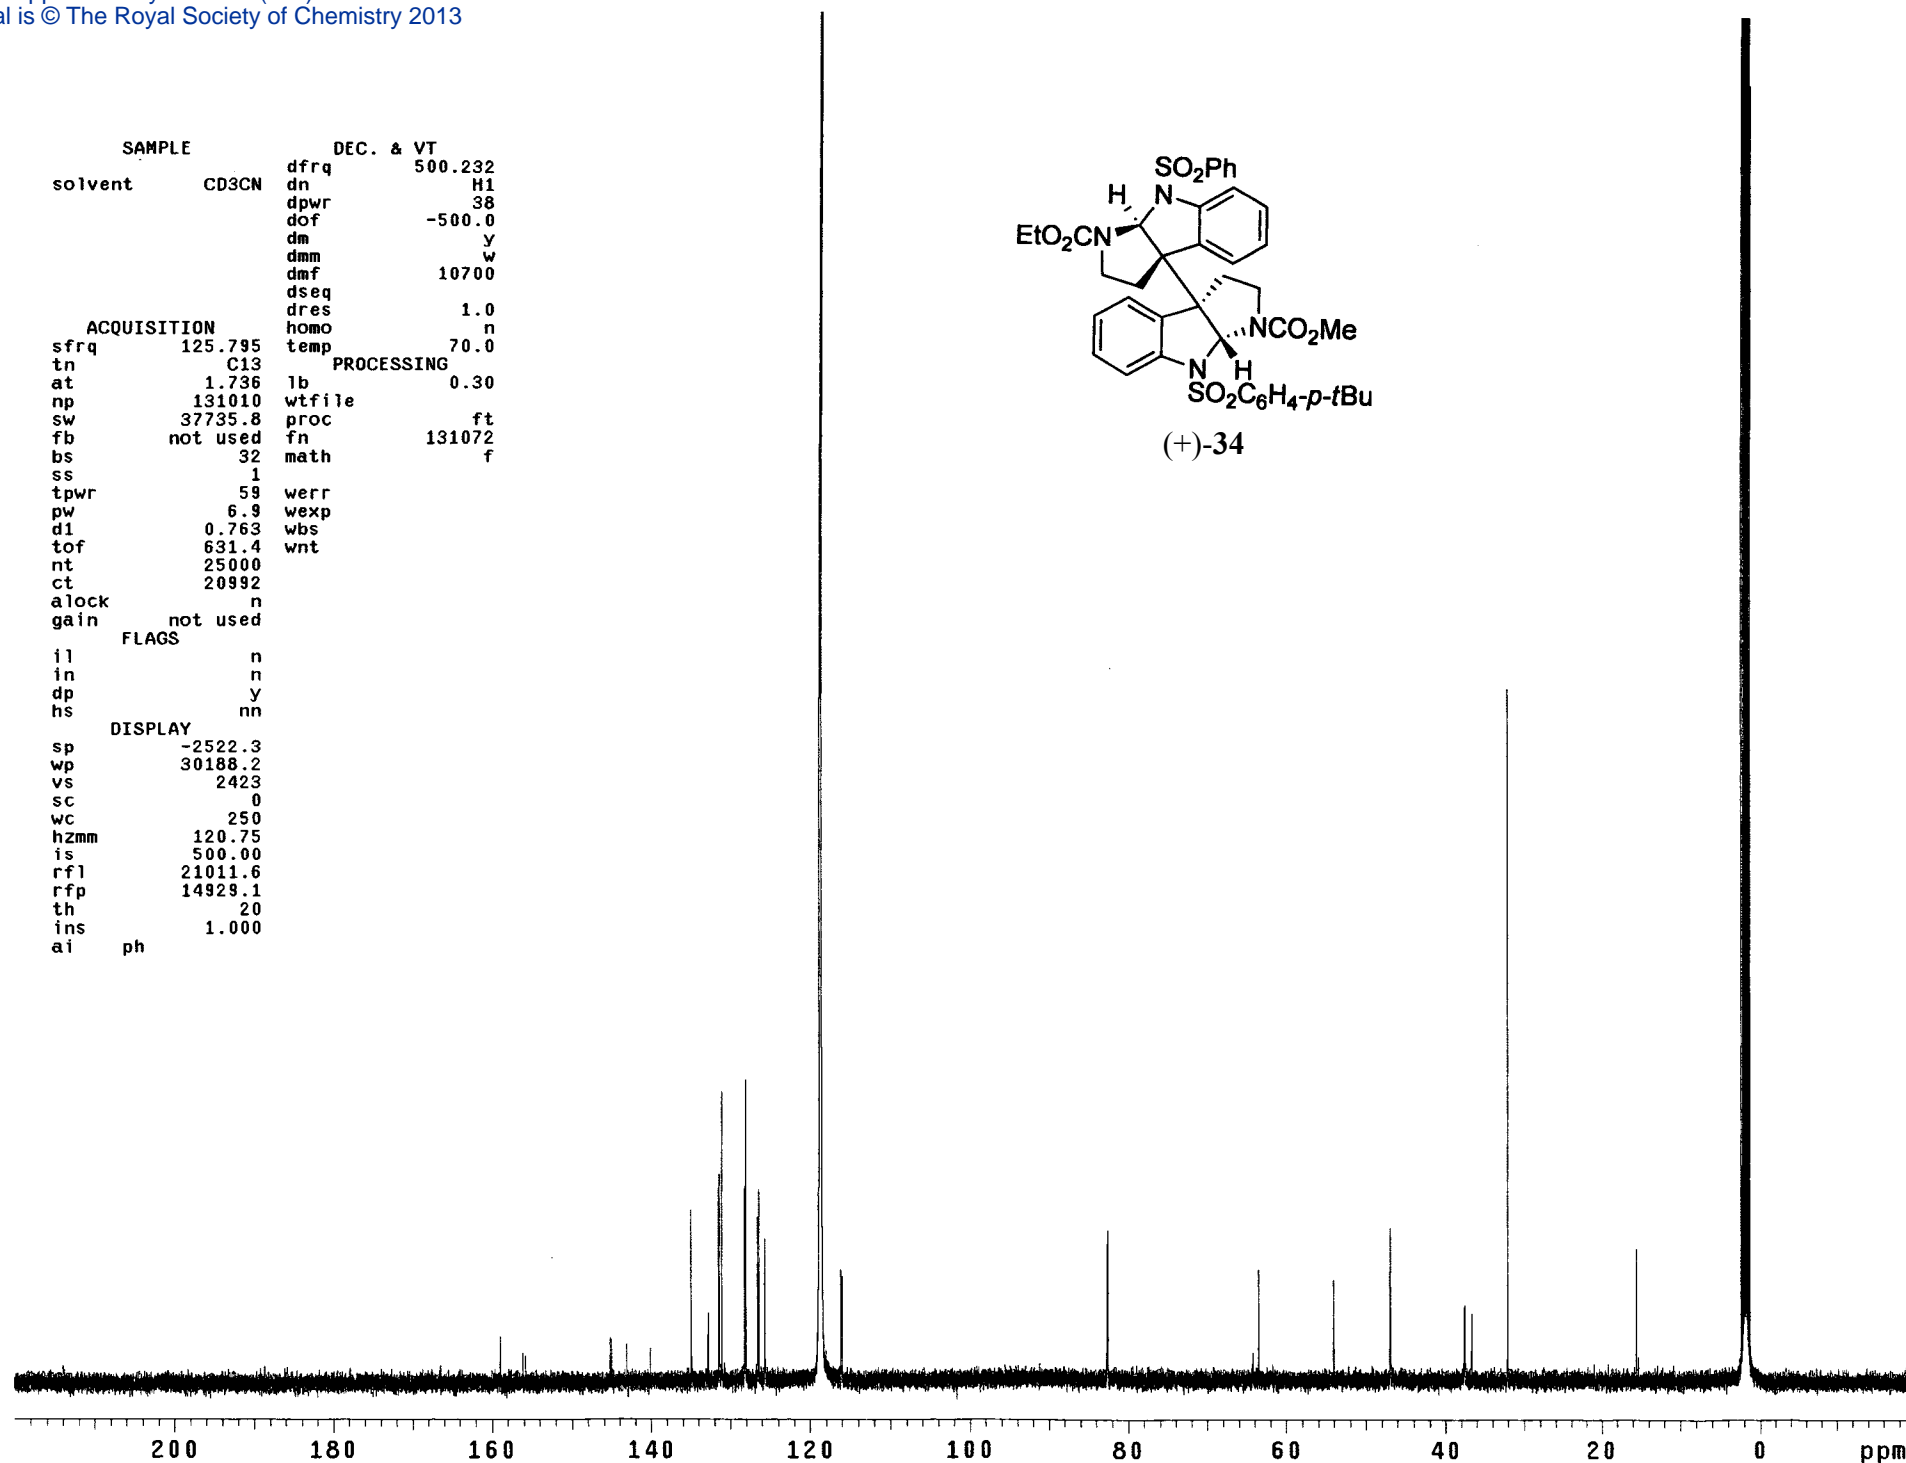

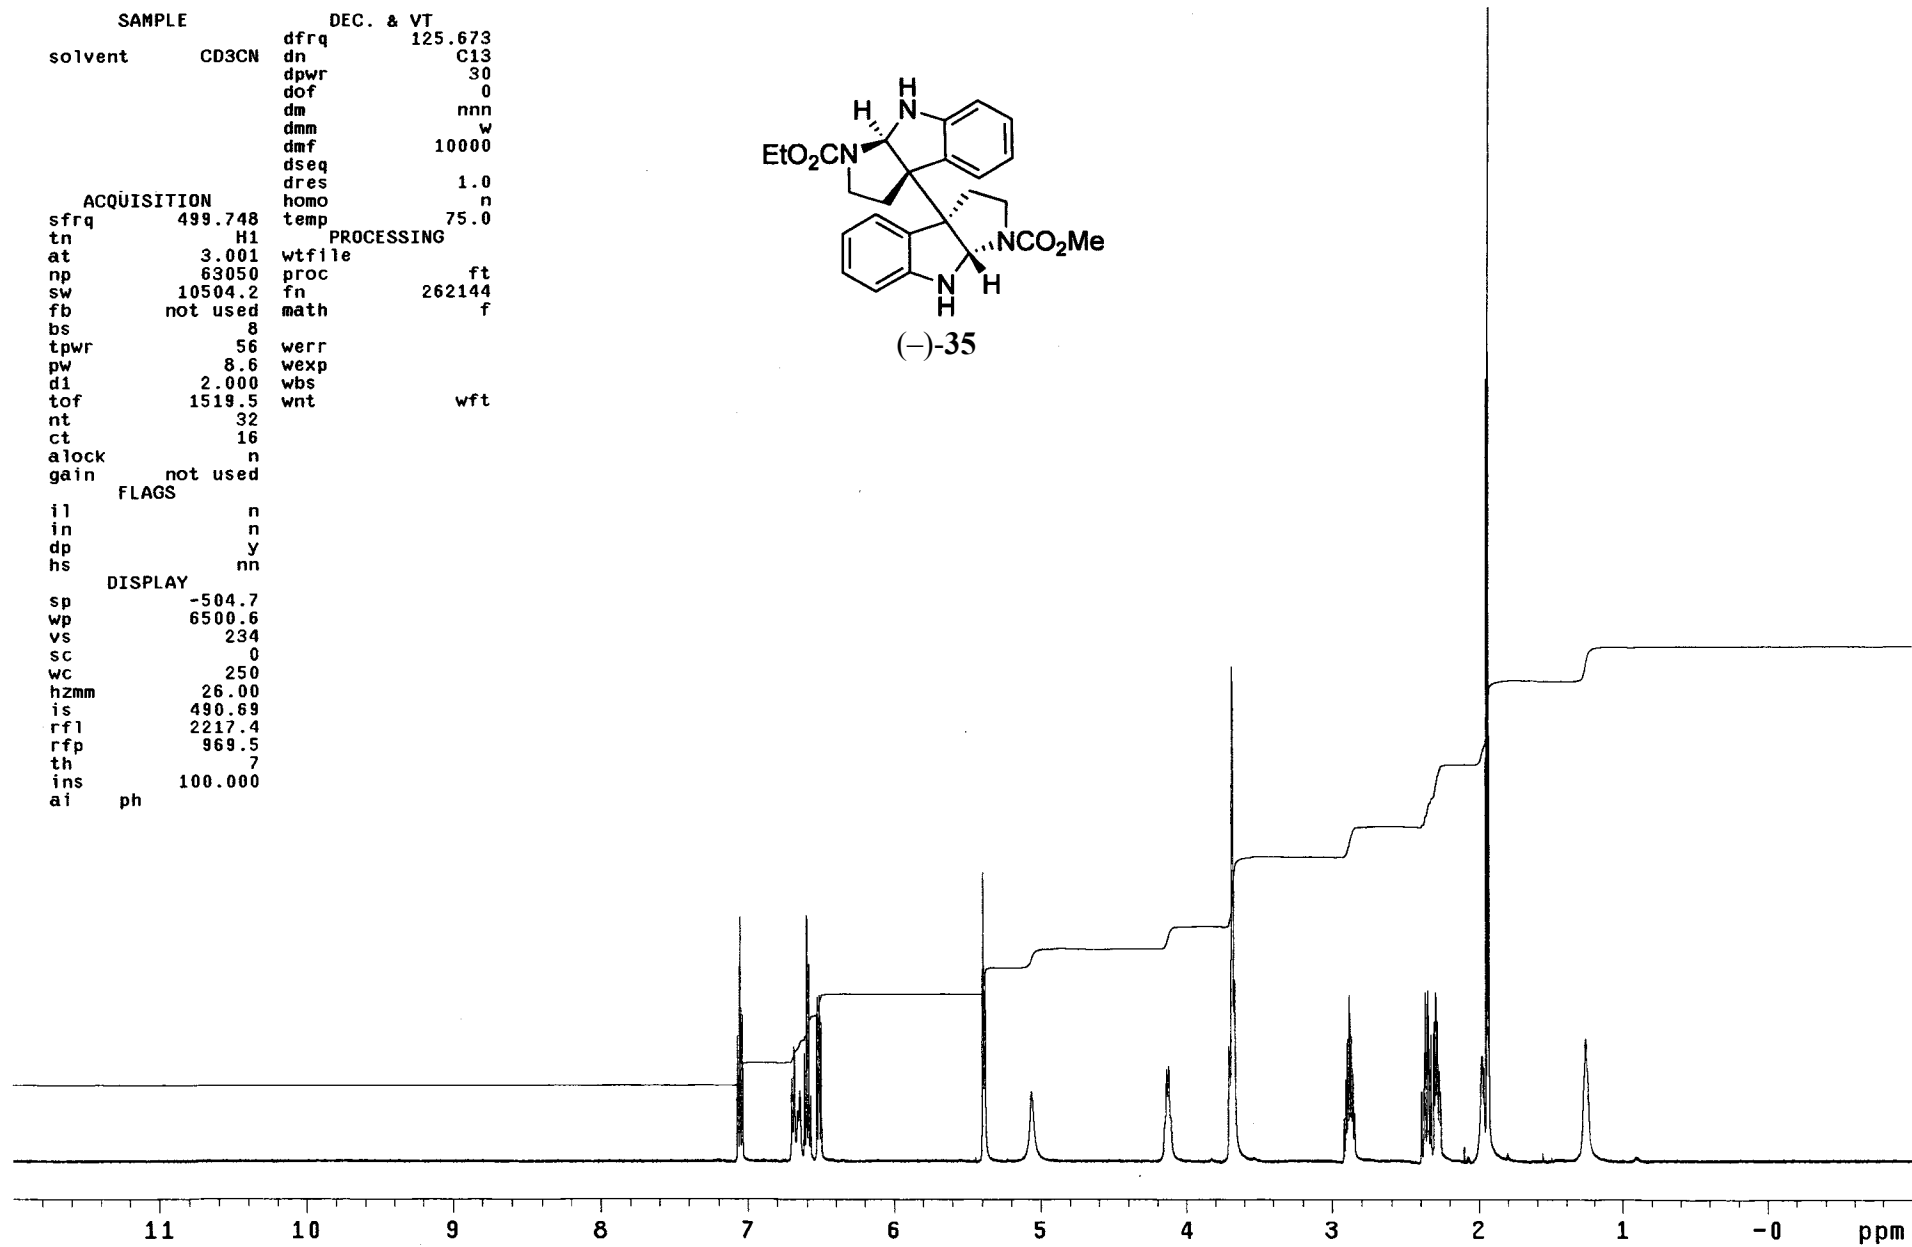

S133/S153

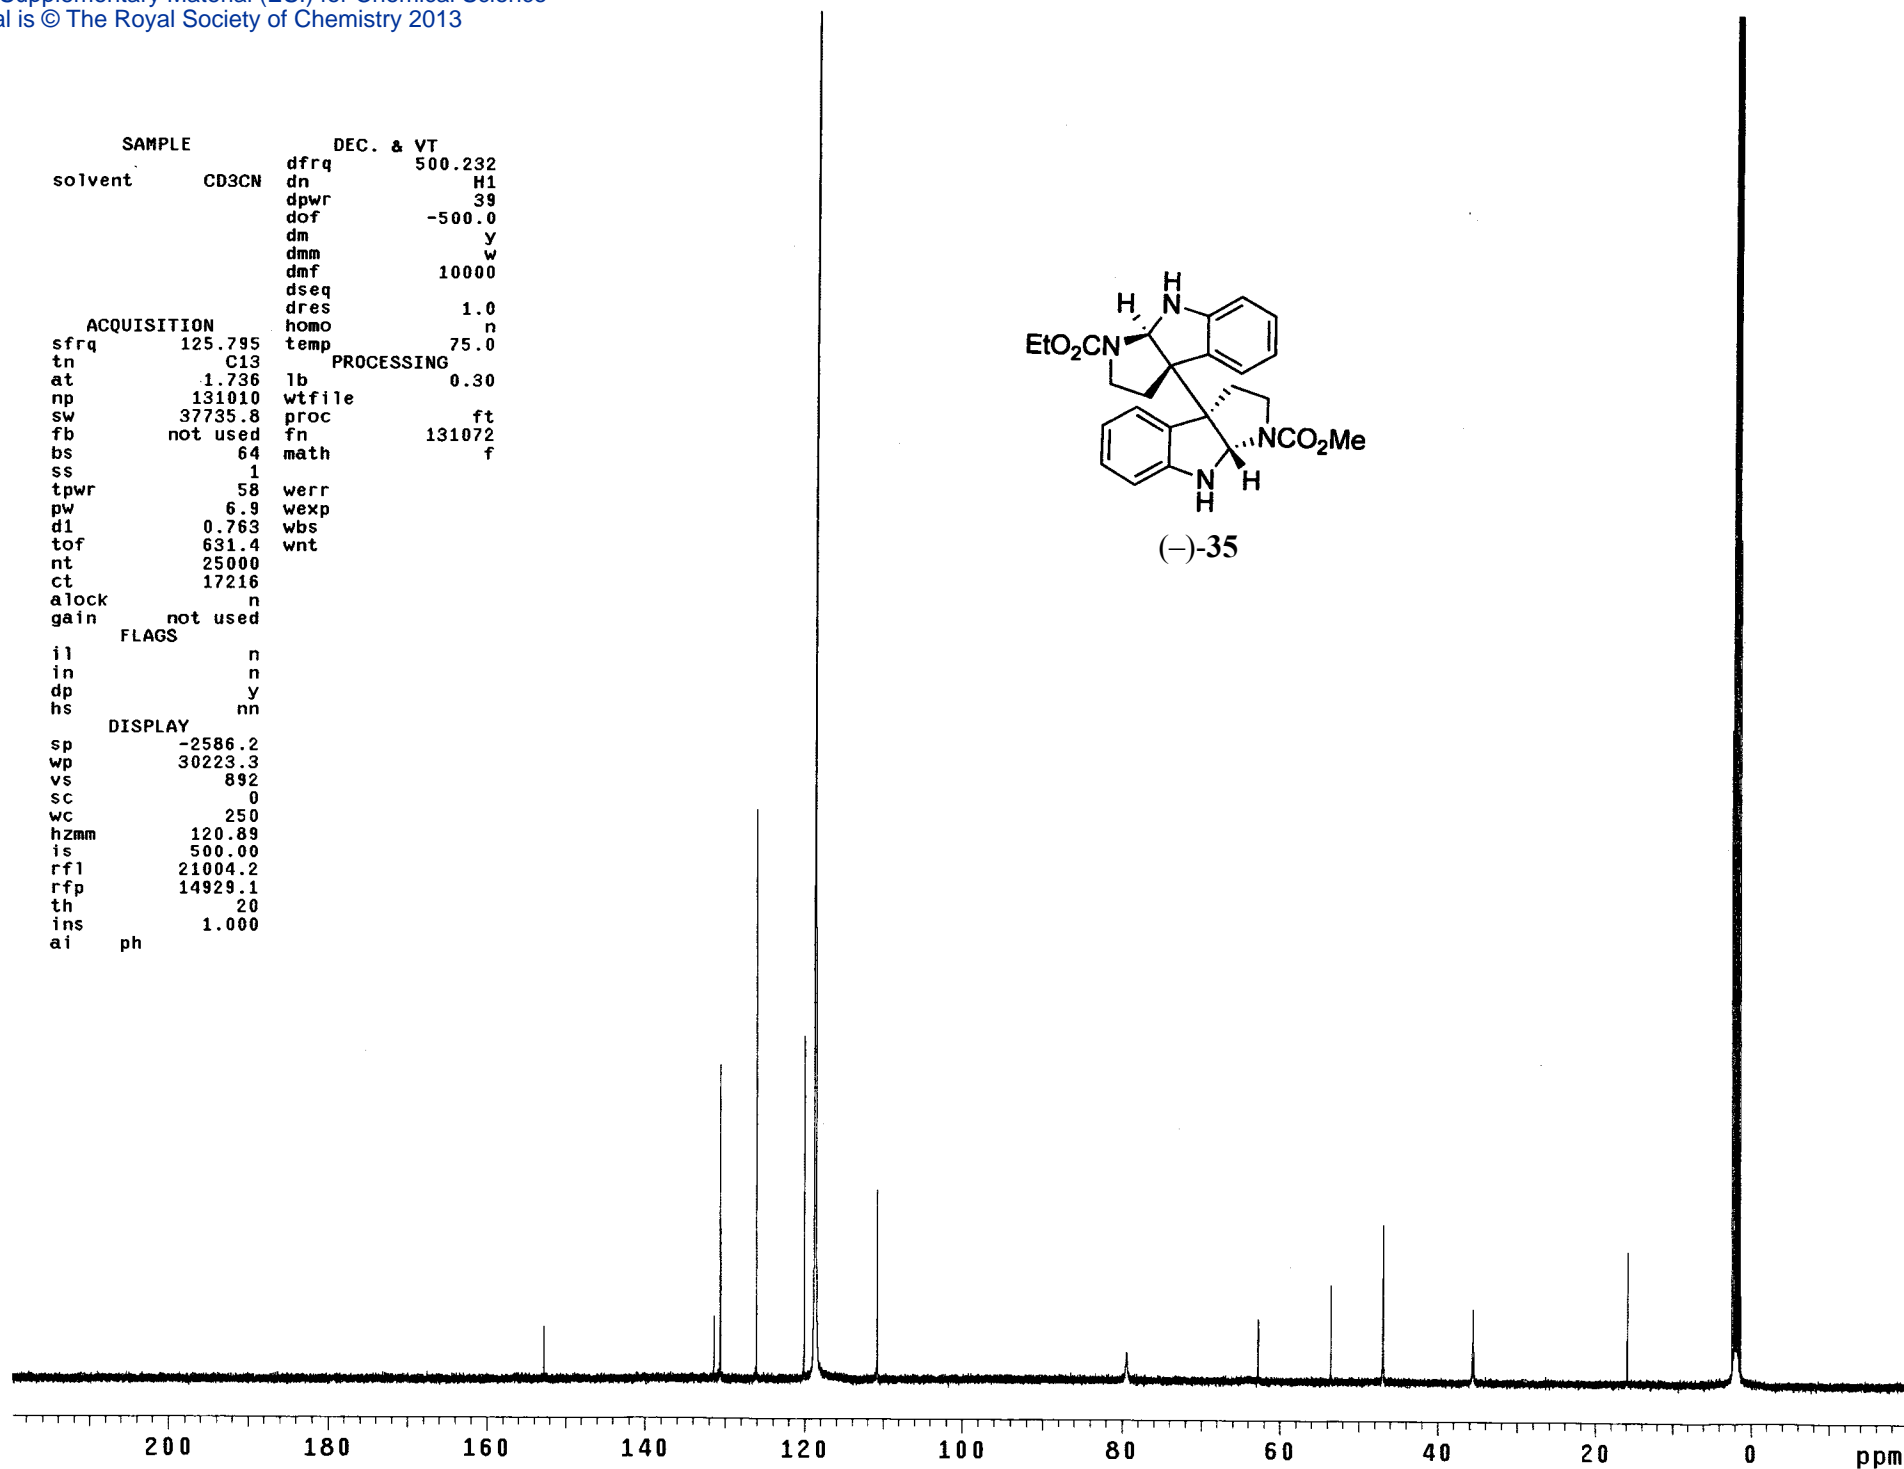

S134/S153

|             |          |            |         |
|-------------|----------|------------|---------|
| SAMPLE      |          | DEC. & VT  |         |
| solvent     | CD3OD    | dfrq       | 125.673 |
|             |          | dn         | C13     |
|             |          | dpwr       | 30      |
|             |          | dof        | 0       |
|             |          | dm         | nnn     |
|             |          | dmm        | w       |
|             |          | dmf        | 10000   |
| ACQUISITION |          | dseq       |         |
| sfrq        | 499.748  | dres       | 1.0     |
| tn          | H1       | homo       | n       |
| at          | 3.001    | temp       | 55.0    |
| np          | 63050    | PROCESSING |         |
| sw          | 10504.2  | wtfile     |         |
| fb          | not used | proc       | ft      |
| bs          | 4        | fn         | 262144  |
| tpwr        | 56       | math       | f       |
| pw          | 8.6      |            |         |
| d1          | 2.000    | werr       |         |
| tof         | 1519.5   | wexp       |         |
| nt          | 16       | wbs        |         |
| ct          | 16       | wnt        | wft     |
| alock       | n        |            |         |
| gain        | not used |            |         |
| FLAGS       |          |            |         |
| il          | n        |            |         |
| in          | n        |            |         |
| dp          | y        |            |         |
| hs          | nn       |            |         |
| DISPLAY     |          |            |         |
| sp          | -508.9   |            |         |
| wp          | 6508.2   |            |         |
| vs          | 65       |            |         |
| sc          | 0        |            |         |
| wc          | 250      |            |         |
| hzmm        | 26.03    |            |         |
| is          | 210.20   |            |         |
| rfl         | 2283.1   |            |         |
| rfp         | 1654.1   |            |         |
| th          | 7        |            |         |
| ins         | 100.000  |            |         |
| ai          | ph       |            |         |

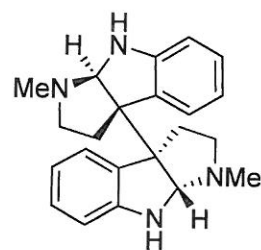

*meso*-chimonanthine (**2**)

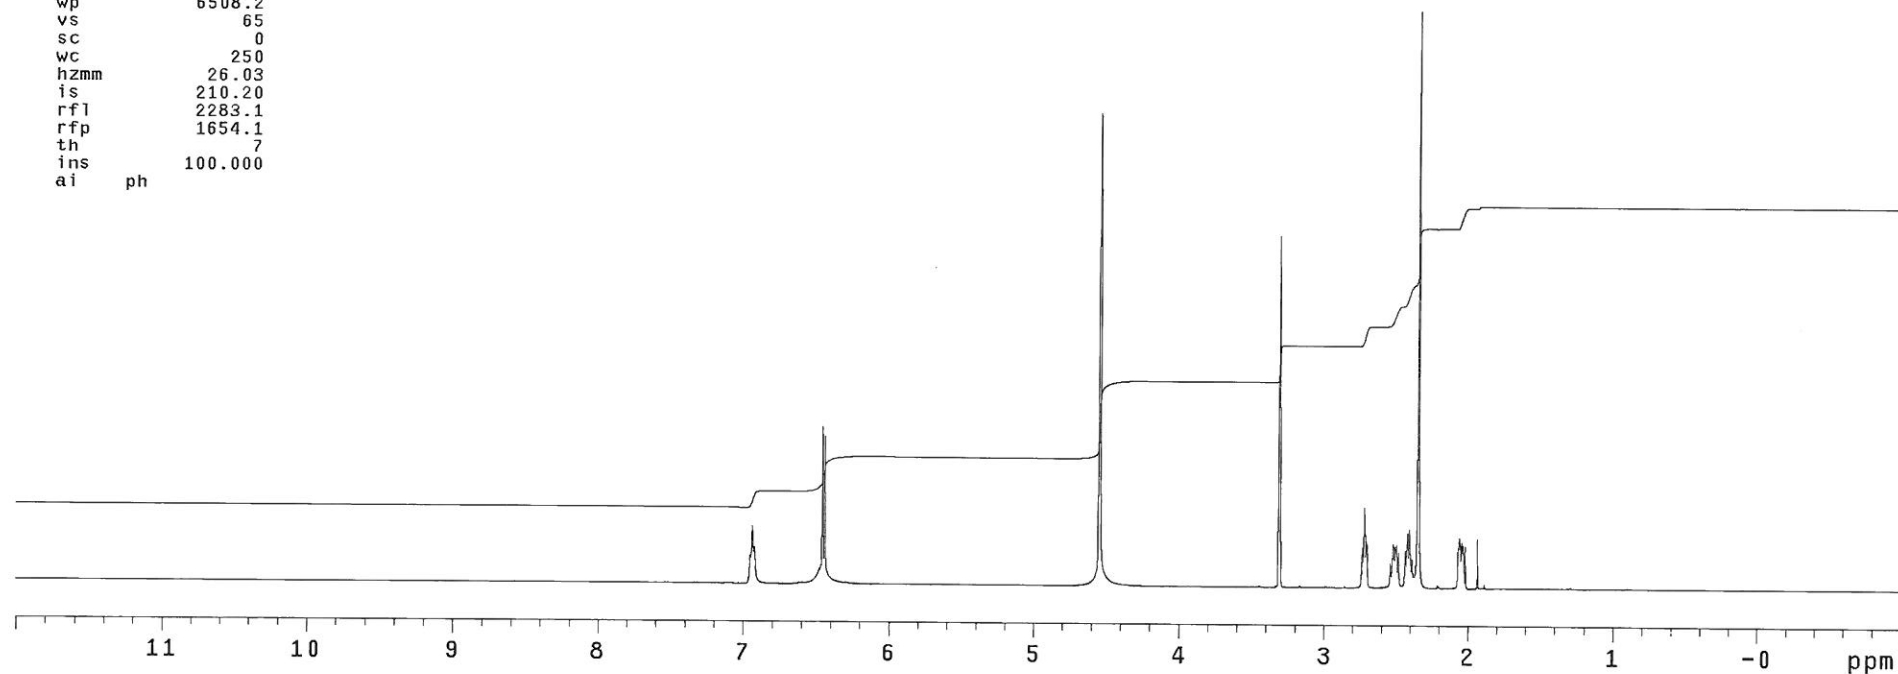

| SAMPLE      |          | DEC. & VT  |         |
|-------------|----------|------------|---------|
| solvent     | CD3OD    | dfrq       | 500.231 |
|             |          | dn         | H1      |
|             |          | dpwr       | 39      |
|             |          | dof        | -500.0  |
|             |          | dm         | y       |
|             |          | dmm        | w       |
|             |          | dmf        | 10000   |
| ACQUISITION |          | PROCESSING |         |
| sfrq        | 125.795  | dseq       |         |
| tn          | C13      | dres       | 1.0     |
| at          | 1.736    | homo       | n       |
| np          | 131010   | temp       | 55.0    |
| sw          | 37735.8  | lb         | 0.30    |
| fb          | not used | wtfile     |         |
| bs          | 64       | proc       | ft      |
| ss          | 1        | fn         | 131072  |
| tpwr        | 58       | math       | f       |
| pw          | 6.9      |            |         |
| d1          | 0.763    | werr       |         |
| tof         | 631.4    | wexp       |         |
| nt          | 18000    | wbs        |         |
| ct          | 16832    | wnt        |         |
| alock       | n        |            |         |
| gain        | not used |            |         |
| FLAGS       |          |            |         |
| il          | n        |            |         |
| in          | n        |            |         |
| dp          | y        |            |         |
| hs          | nn       |            |         |
| DISPLAY     |          |            |         |
| sp          | -2573.3  |            |         |
| wp          | 30249.8  |            |         |
| vs          | 2412     |            |         |
| sc          | 0        |            |         |
| wc          | 250      |            |         |
| hzmm        | 121.00   |            |         |
| is          | 500.00   |            |         |
| rfl         | 12298.8  |            |         |
| rfp         | 6182.5   |            |         |
| th          | 20       |            |         |
| ins         | 1.000    |            |         |
| ai          | ph       |            |         |

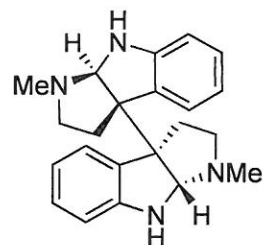

*meso*-chimonanthine (2)

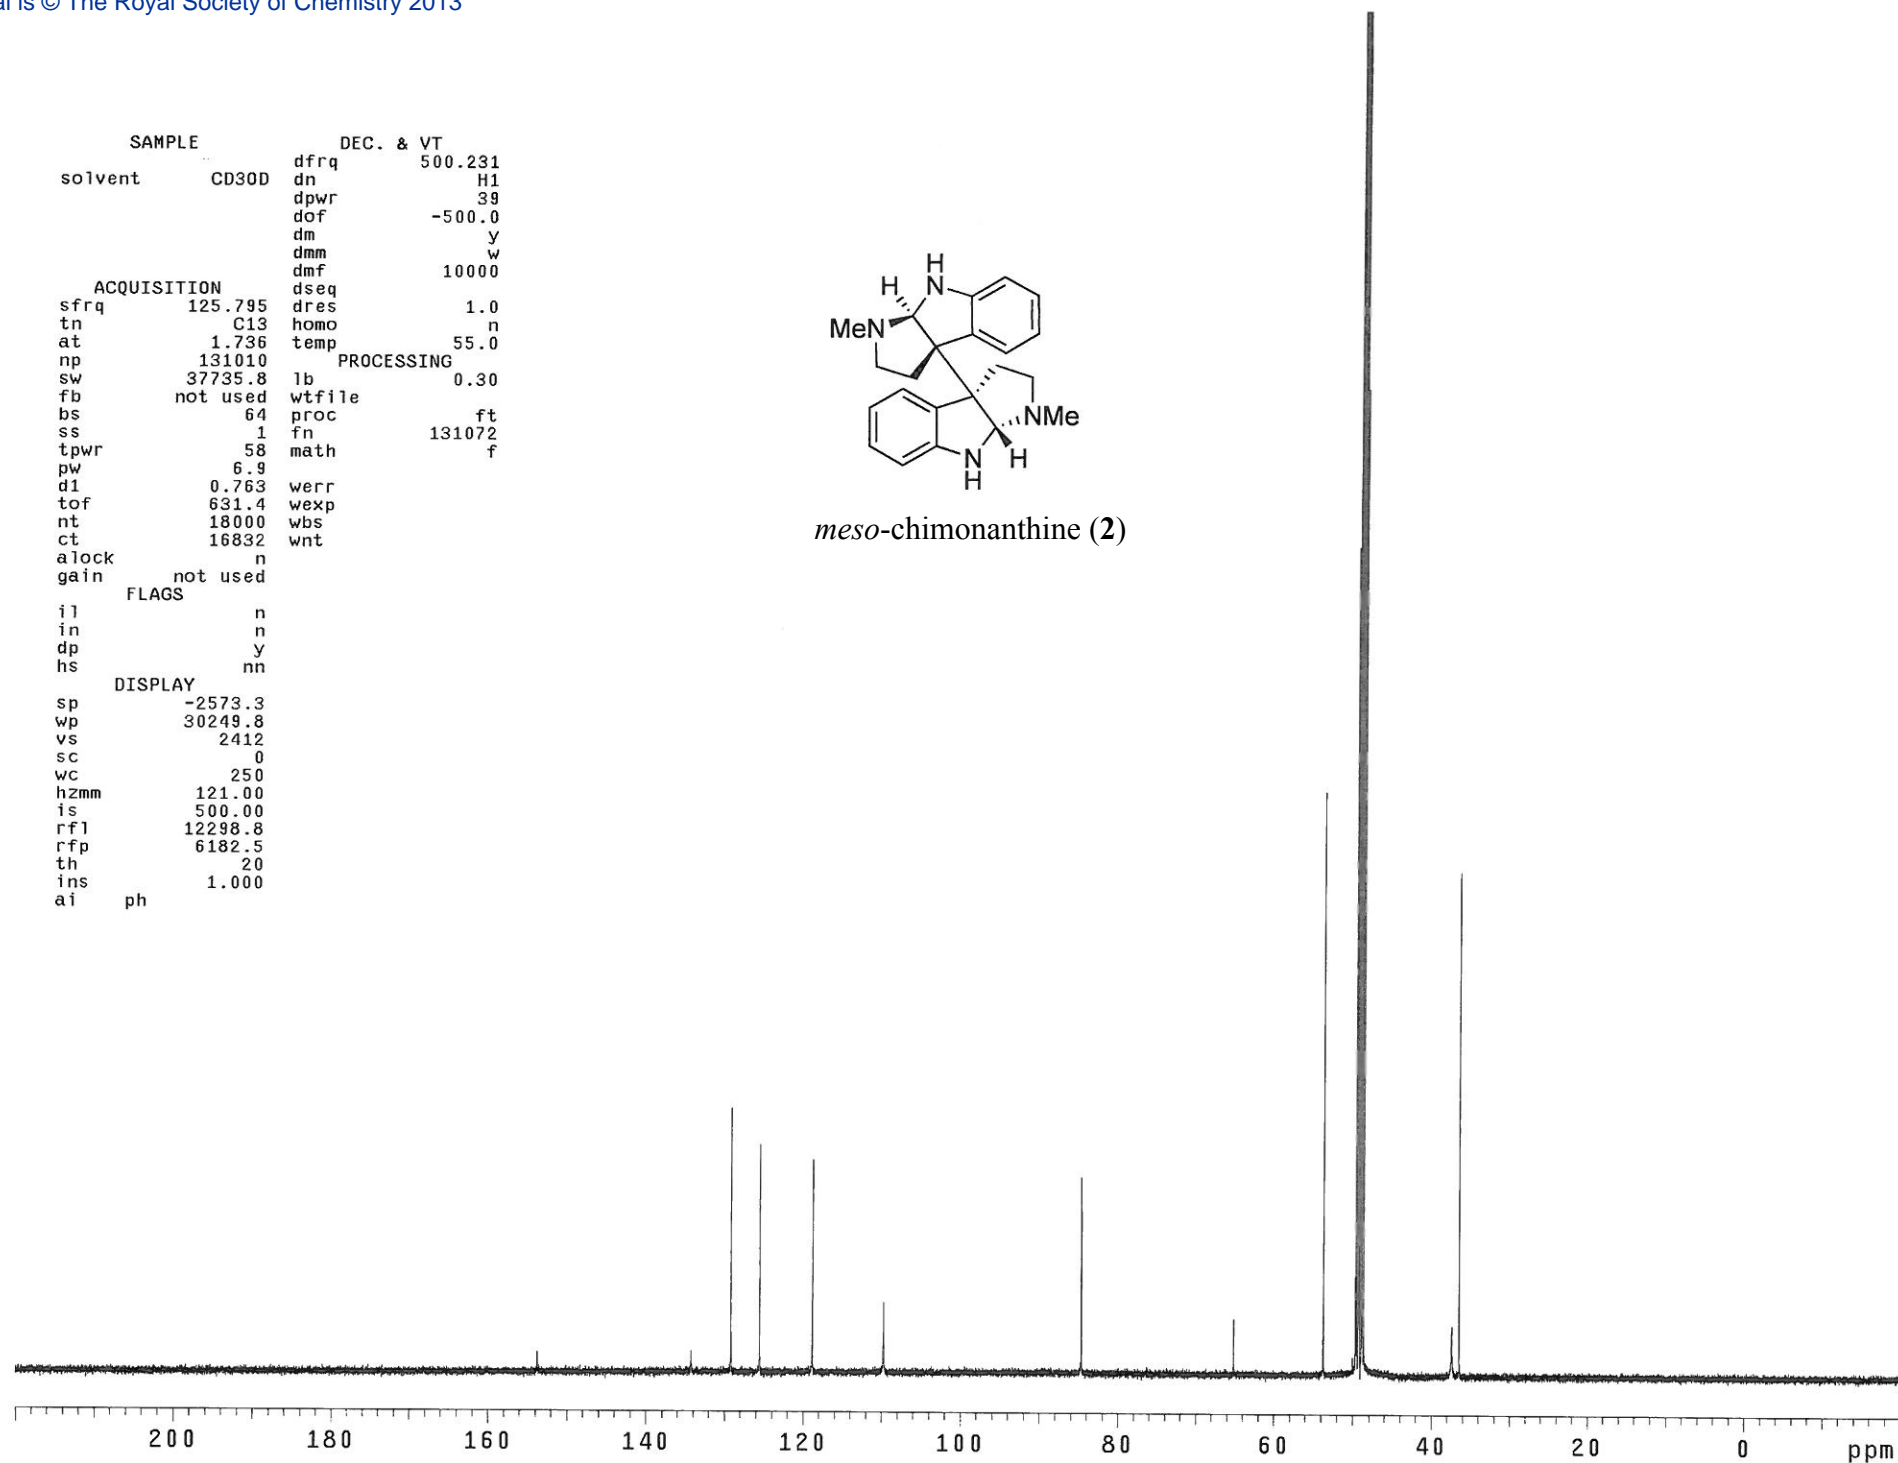

S136/S153

```

SAMPLE          DEC. & VT
solvent          DMSO    dfrq      125.795
                   dn      C13
                   dpwr     39
                   dof       0
                   dm      nnn
                   dmm       c
                   dmf      10000
ACQUISITION      sfrq     500.234
                   tn      H1
                   at      3.200
                   np      64000
                   sw      10000.0
                   fb      not used
                   bs       8
                   ss       1
                   tpwr     60
                   pw       9.0
                   dl      1.800
                   tof     1498.2
                   nt       32
                   ct       32
                   alock    n
                   gain     not used
                   FLAGS
                   il       n
                   in       n
                   dp       y
                   hs      nn
DISPLAY          sp      -498.0
                   wp     6501.5
                   vs       61
                   sc       0
                   wc      250
                   hzmm    26.01
                   is     203.12
                   rfl     2243.7
                   rfp     1250.6
                   th       7
                   ins     1.000
                   ai      ph
                   
```

PROCESSING

ft  
f

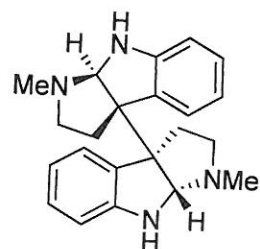

*meso*-chimonanthine (2)

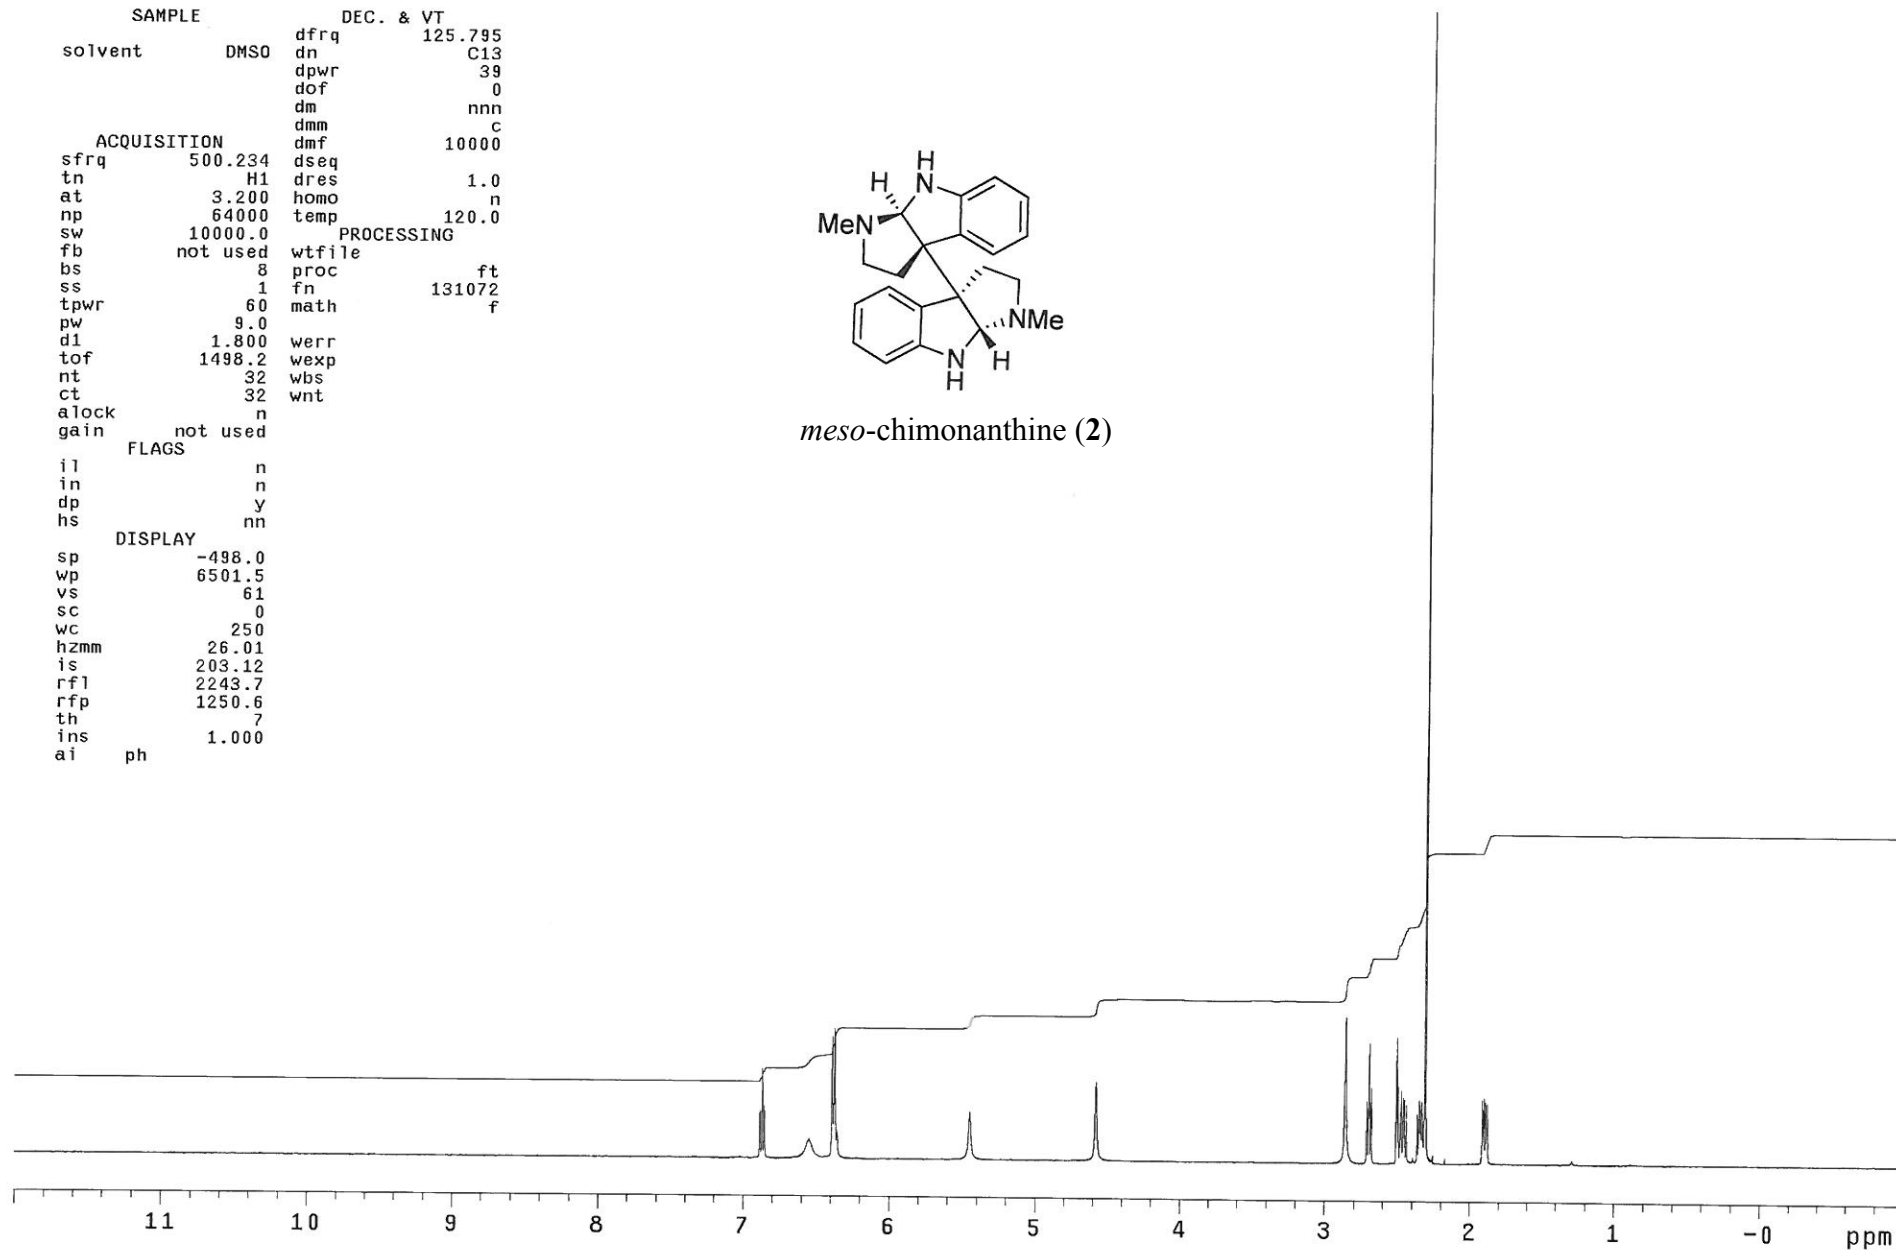



S137/S153

| SAMPLE      |          | DEC. & VT  |         |
|-------------|----------|------------|---------|
| solvent     | DMSO     | dfrq       | 500.232 |
|             |          | dn         | H1      |
|             |          | dpwr       | 40      |
|             |          | dof        | -500.0  |
|             |          | dm         | y       |
|             |          | dmm        | w       |
|             |          | dmf        | 10000   |
|             |          | dseq       |         |
|             |          | dres       | 1.0     |
|             |          | homo       | n       |
|             |          | temp       | 120.0   |
| ACQUISITION |          | PROCESSING |         |
| sfrq        | 125.795  | lb         | 0.30    |
| tn          | C13      | wtfile     |         |
| at          | 1.736    | proc       | ft      |
| np          | 131010   | fn         | 131072  |
| sw          | 37735.8  | math       | f       |
| fb          | not used |            |         |
| bs          | 32       |            |         |
| ss          | 1        |            |         |
| tpwr        | 58       | werr       |         |
| pw          | 6.9      | wexp       |         |
| d1          | 0.763    | wbs        |         |
| tof         | 631.4    | wnt        |         |
| nt          | 25000    |            |         |
| ct          | 16192    |            |         |
| alock       | n        |            |         |
| gain        | not used |            |         |
| FLAGS       |          |            |         |
| il          | n        |            |         |
| in          | n        |            |         |
| dp          | y        |            |         |
| hs          | nn       |            |         |
| DISPLAY     |          |            |         |
| sp          | -2508.8  |            |         |
| wp          | 30170.4  |            |         |
| vs          | 537      |            |         |
| sc          | 0        |            |         |
| wc          | 250      |            |         |
| hzmm        | 120.68   |            |         |
| is          | 500.00   |            |         |
| rfl         | 11428.0  |            |         |
| rfp         | 3837.7   |            |         |
| th          | 20       |            |         |
| ins         | 1.000    |            |         |
| ai          | ph       |            |         |

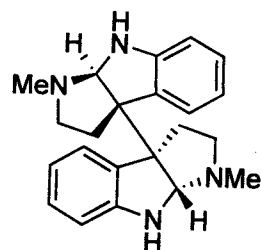

*meso*-chimonanthine (2)

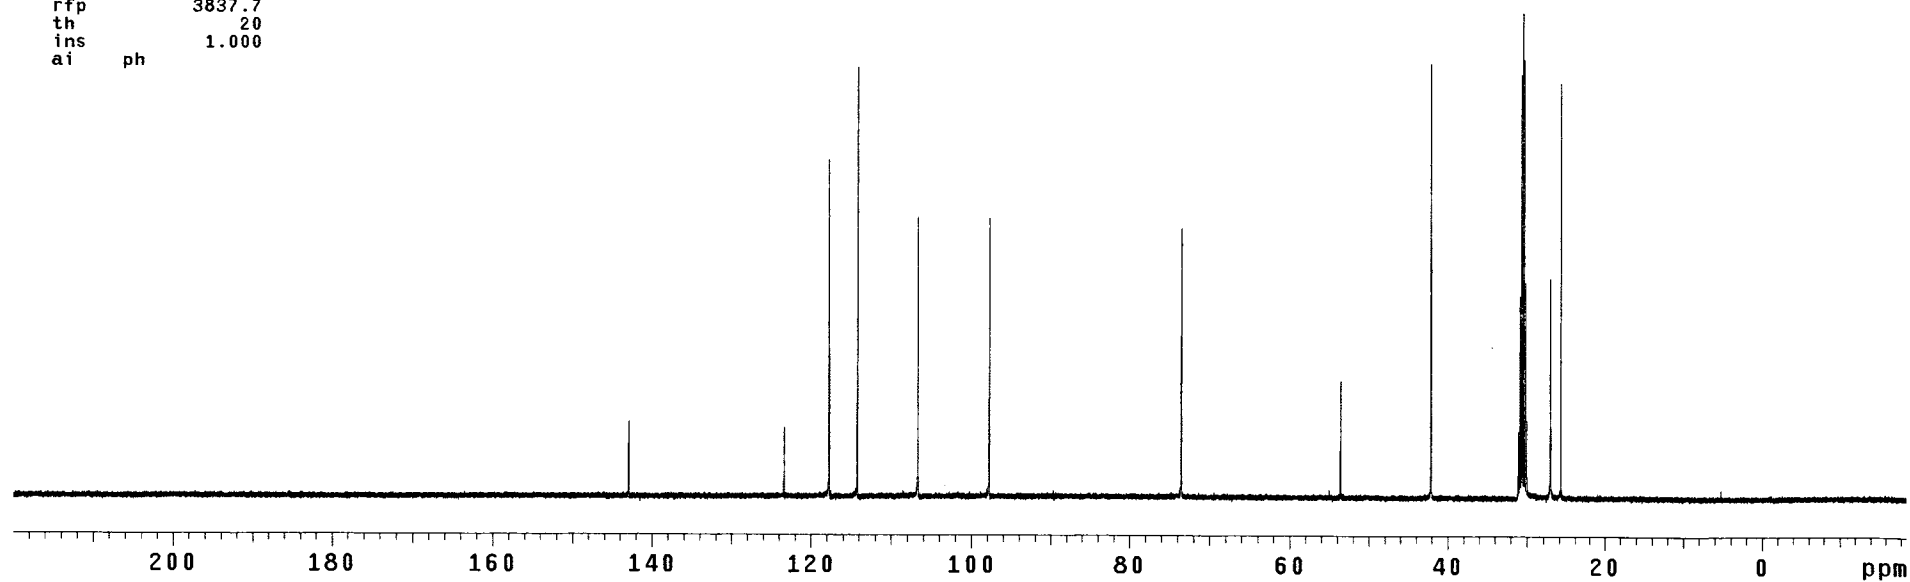

| SAMPLE      |          | DEC. & VT  |         |
|-------------|----------|------------|---------|
| solvent     | CD2C12   | dfrq       | 125.672 |
|             |          | dn         | C13     |
|             |          | dpwr       | 30      |
|             |          | dof        | 0       |
|             |          | dm         | nnn     |
|             |          | dmm        | w       |
|             |          | dmf        | 10000   |
| ACQUISITION |          | PROCESSING |         |
| sfrq        | 499.747  | dseq       | 1.0     |
| tn          | H1       | dres       | n       |
| at          | 3.001    | homo       |         |
| np          | 63050    | wtfile     | ft      |
| sw          | 10504.2  | proc       | 262144  |
| fb          | not used | fn         | f       |
| bs          | 4        | math       |         |
| tpwr        | 56       |            |         |
| pw          | 8.6      | werr       |         |
| d1          | 2.000    | wexp       |         |
| tof         | 1519.5   | wbs        |         |
| nt          | 16       | wnt        | wft     |
| ct          | 8        |            |         |
| alock       | n        |            |         |
| gain        | not used |            |         |
| FLAGS       |          |            |         |
| il          | n        |            |         |
| in          | n        |            |         |
| dp          | y        |            |         |
| hs          | nn       |            |         |
| DISPLAY     |          |            |         |
| sp          | -506.0   |            |         |
| wp          | 6501.7   |            |         |
| vs          | 20       |            |         |
| sc          | 0        |            |         |
| wc          | 250      |            |         |
| hzmm        | 26.01    |            |         |
| is          | 131.20   |            |         |
| rfl         | 3904.1   |            |         |
| rfp         | 2658.6   |            |         |
| th          | 7        |            |         |
| ins         | 100.000  |            |         |
| ai          | ph       |            |         |

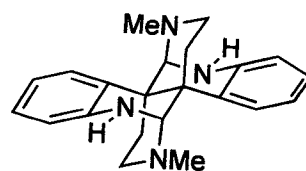

*meso*-calycanthine (36)

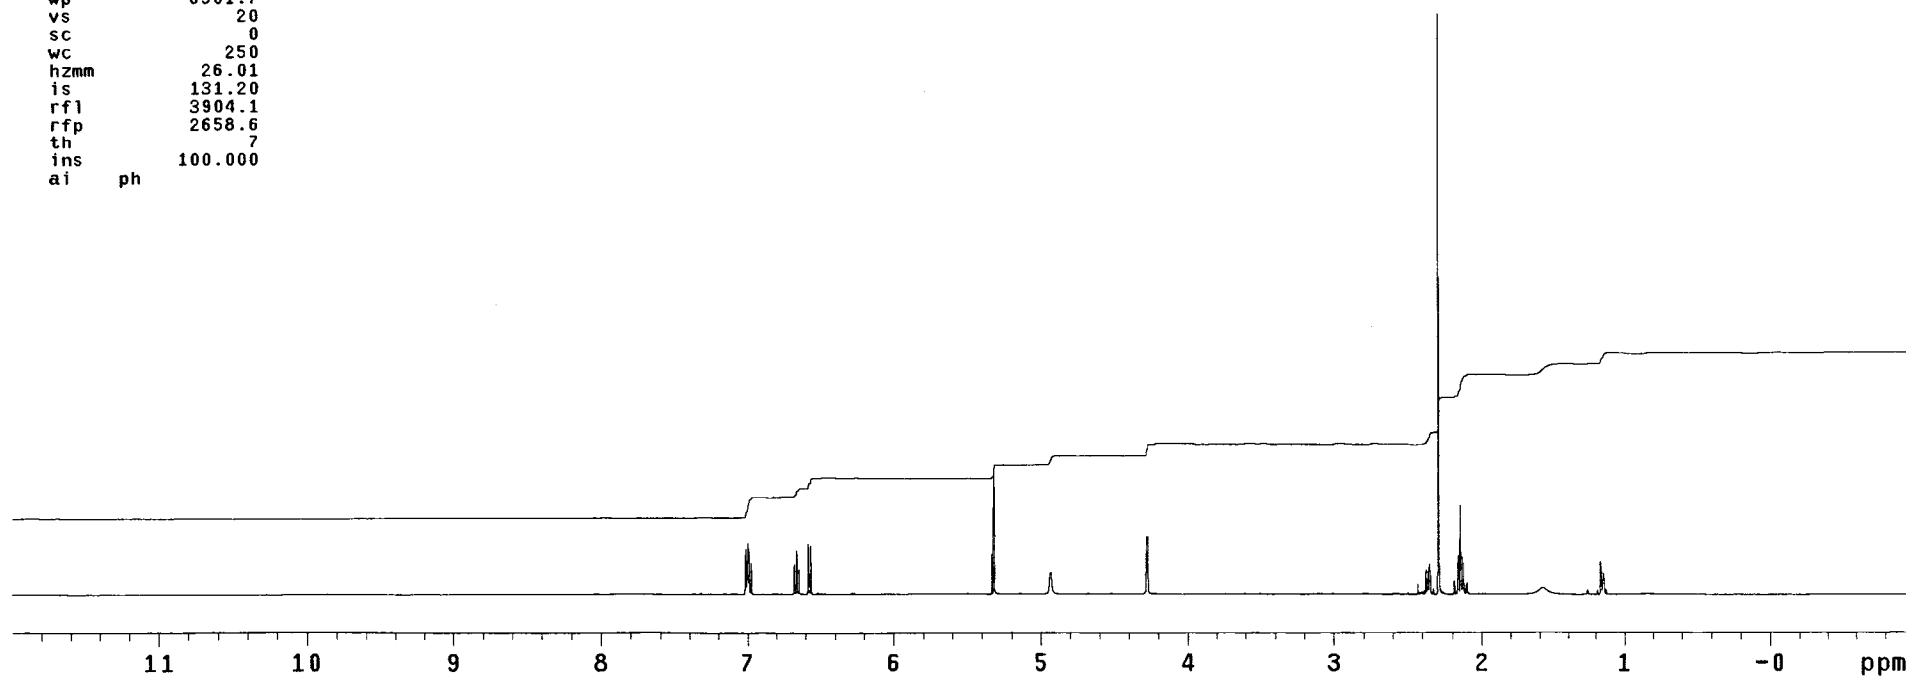

|             |          |            |         |
|-------------|----------|------------|---------|
| SAMPLE      |          | DEC. & VT  |         |
| solvent     | CD2Cl2   | dfrq       | 500.230 |
|             |          | dn         | H1      |
|             |          | dpwr       | 39      |
|             |          | dof        | -500.0  |
|             |          | dm         | y       |
|             |          | dmm        | w       |
|             |          | dmf        | 10000   |
| ACQUISITION |          | dseq       |         |
| sfrq        | 125.795  | dres       | 1.0     |
| tn          | C13      | homo       | n       |
| at          | 1.736    | PROCESSING |         |
| np          | 131010   | lb         | 0.30    |
| sw          | 37735.8  | wtfile     |         |
| fb          | not used | proc       | ft      |
| bs          | 64       | fn         | 131072  |
| ss          | 1        | math       | f       |
| tpwr        | 58       | werr       |         |
| pw          | 6.9      | wexp       |         |
| d1          | 0.763    | wbs        |         |
| tof         | 631.4    | wnt        |         |
| nt          | 20000    |            |         |
| ct          | 13632    |            |         |
| alock       | n        |            |         |
| gain        | not used |            |         |
| FLAGS       |          |            |         |
| il          | n        |            |         |
| in          | n        |            |         |
| dp          | y        |            |         |
| hs          | nn       |            |         |
| DISPLAY     |          |            |         |
| sp          | -2519.1  |            |         |
| wp          | 30170.4  |            |         |
| vs          | 2132     |            |         |
| sc          | 0        |            |         |
| wc          | 250      |            |         |
| hzmm        | 120.68   |            |         |
| is          | 500.00   |            |         |
| rfl         | 13036.2  |            |         |
| rfp         | 6792.2   |            |         |
| th          | 20       |            |         |
| ins         | 1.000    |            |         |
| al          | ph       |            |         |

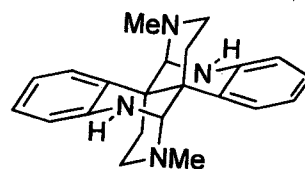

*meso*-calycanthine (36)

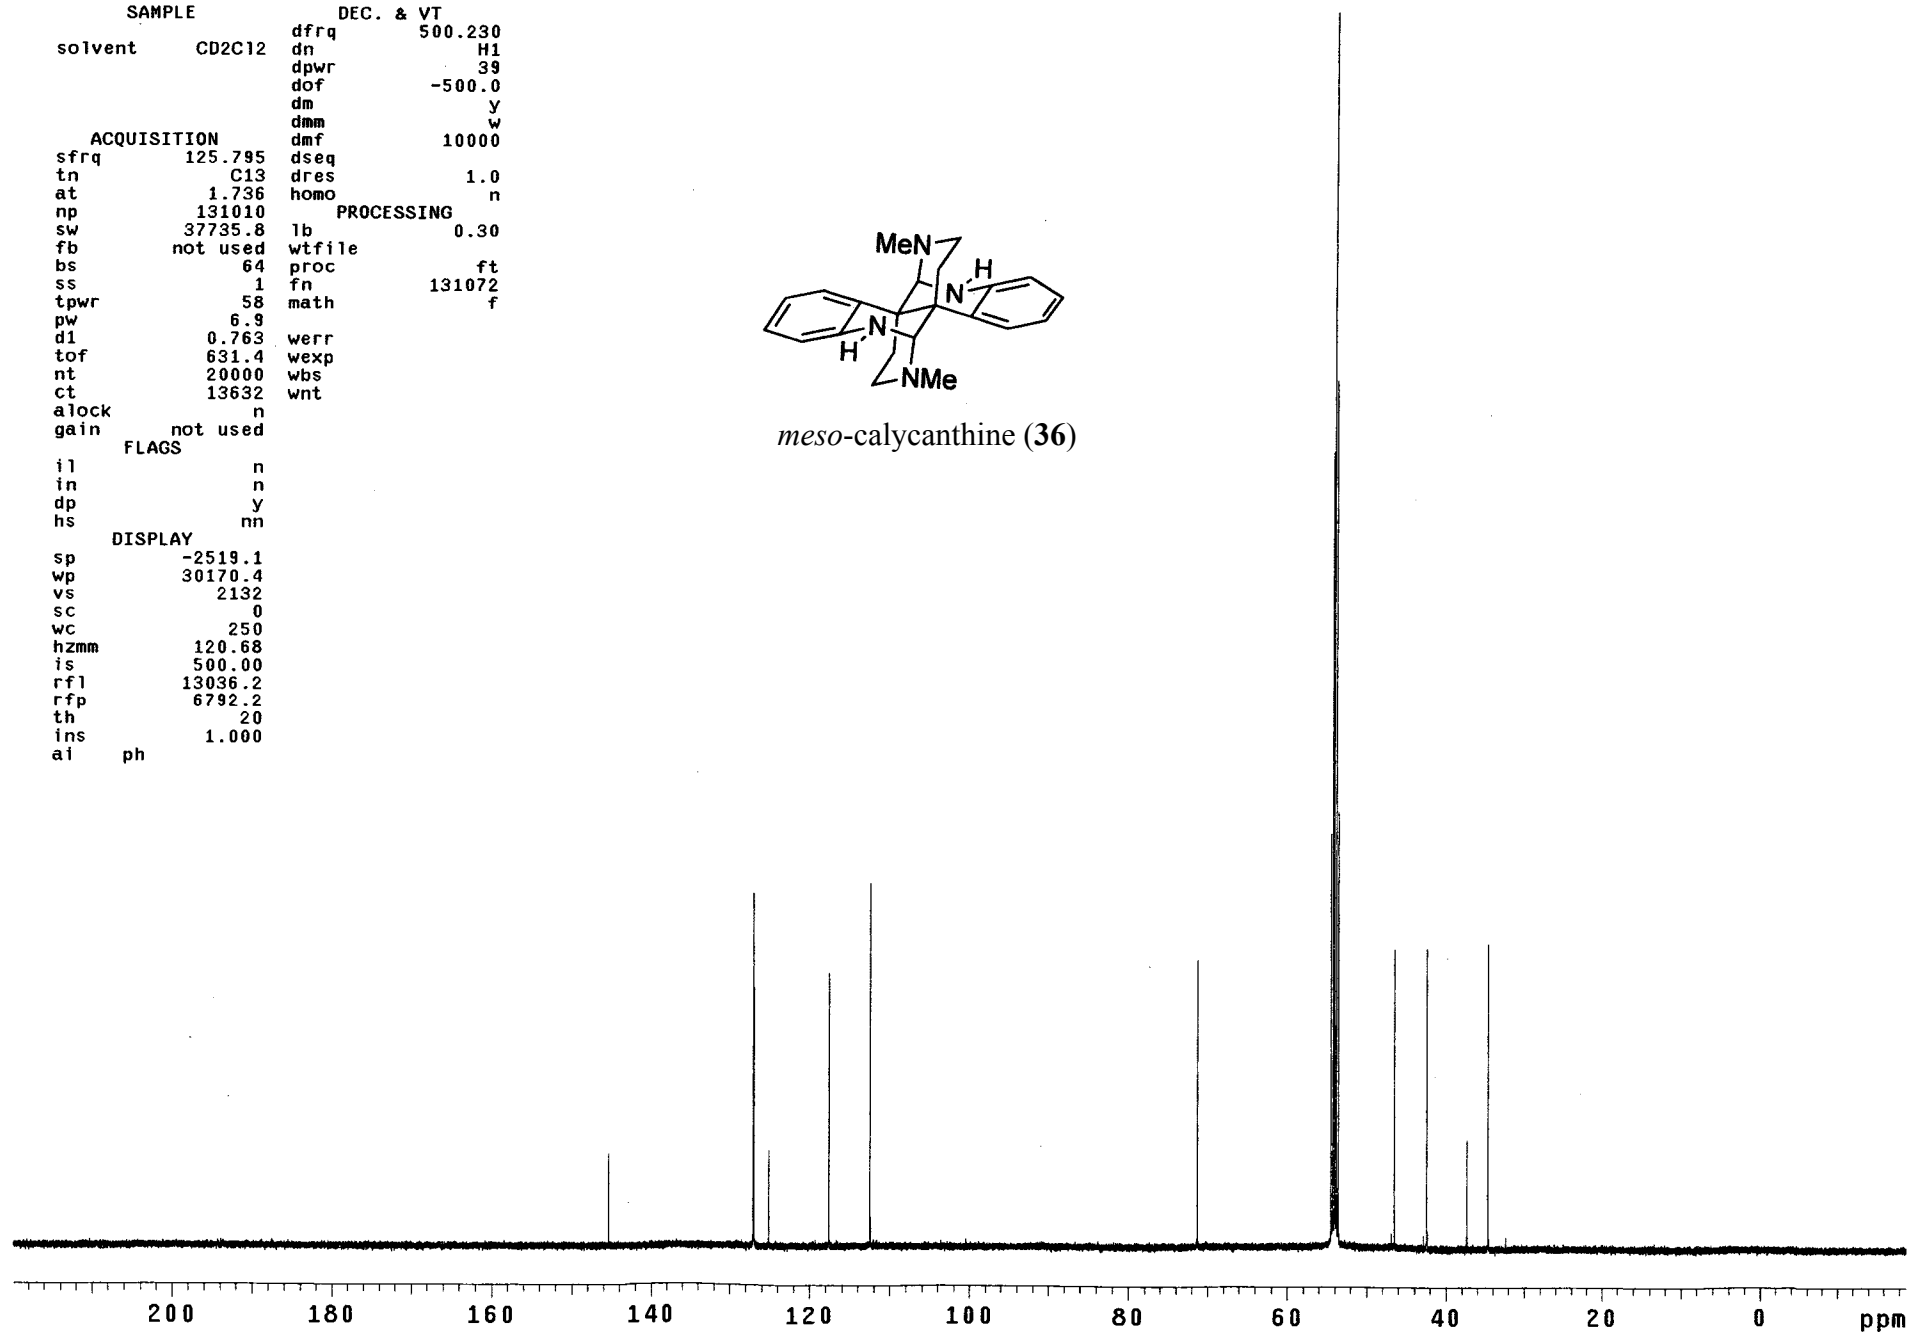

| SAMPLE      |          | DEC. & VT  |         |
|-------------|----------|------------|---------|
| solvent     | CD3CN    | dfrq       | 125.673 |
|             |          | dn         | C13     |
|             |          | dpwr       | 30      |
|             |          | dof        | 0       |
|             |          | dm         | nnn     |
|             |          | dmm        | w       |
|             |          | dmf        | 10000   |
|             |          | dseq       |         |
|             |          | dres       | 1.0     |
|             |          | homo       | n       |
|             |          | temp       | 75.0    |
| ACQUISITION |          | PROCESSING |         |
| sfrq        | 499.748  | wtfile     |         |
| tn          | H1       | proc       | ft      |
| at          | 3.001    | fn         | 262144  |
| np          | 63050    | math       | f       |
| sw          | 10504.2  |            |         |
| fb          | not used |            |         |
| bs          | 8        |            |         |
| tpwr        | 56       | werr       |         |
| pw          | 8.6      | wexp       |         |
| d1          | 2.000    | wbs        |         |
| tof         | 1519.5   | wnt        | wft     |
| nt          | 32       |            |         |
| ct          | 24       |            |         |
| alock       | n        |            |         |
| gain        | not used |            |         |
| FLAGS       |          |            |         |
| il          | n        |            |         |
| in          | n        |            |         |
| dp          | y        |            |         |
| hs          | nn       |            |         |
| DISPLAY     |          |            |         |
| sp          | -497.2   |            |         |
| wp          | 6487.5   |            |         |
| vs          | 172      |            |         |
| sc          | 0        |            |         |
| wc          | 250      |            |         |
| hzmm        | 25.95    |            |         |
| is          | 208.11   |            |         |
| rfl         | 2217.7   |            |         |
| rfp         | 969.5    |            |         |
| th          | 7        |            |         |
| ins         | 100.000  |            |         |
| ai          | ph       |            |         |

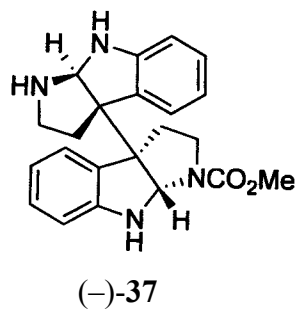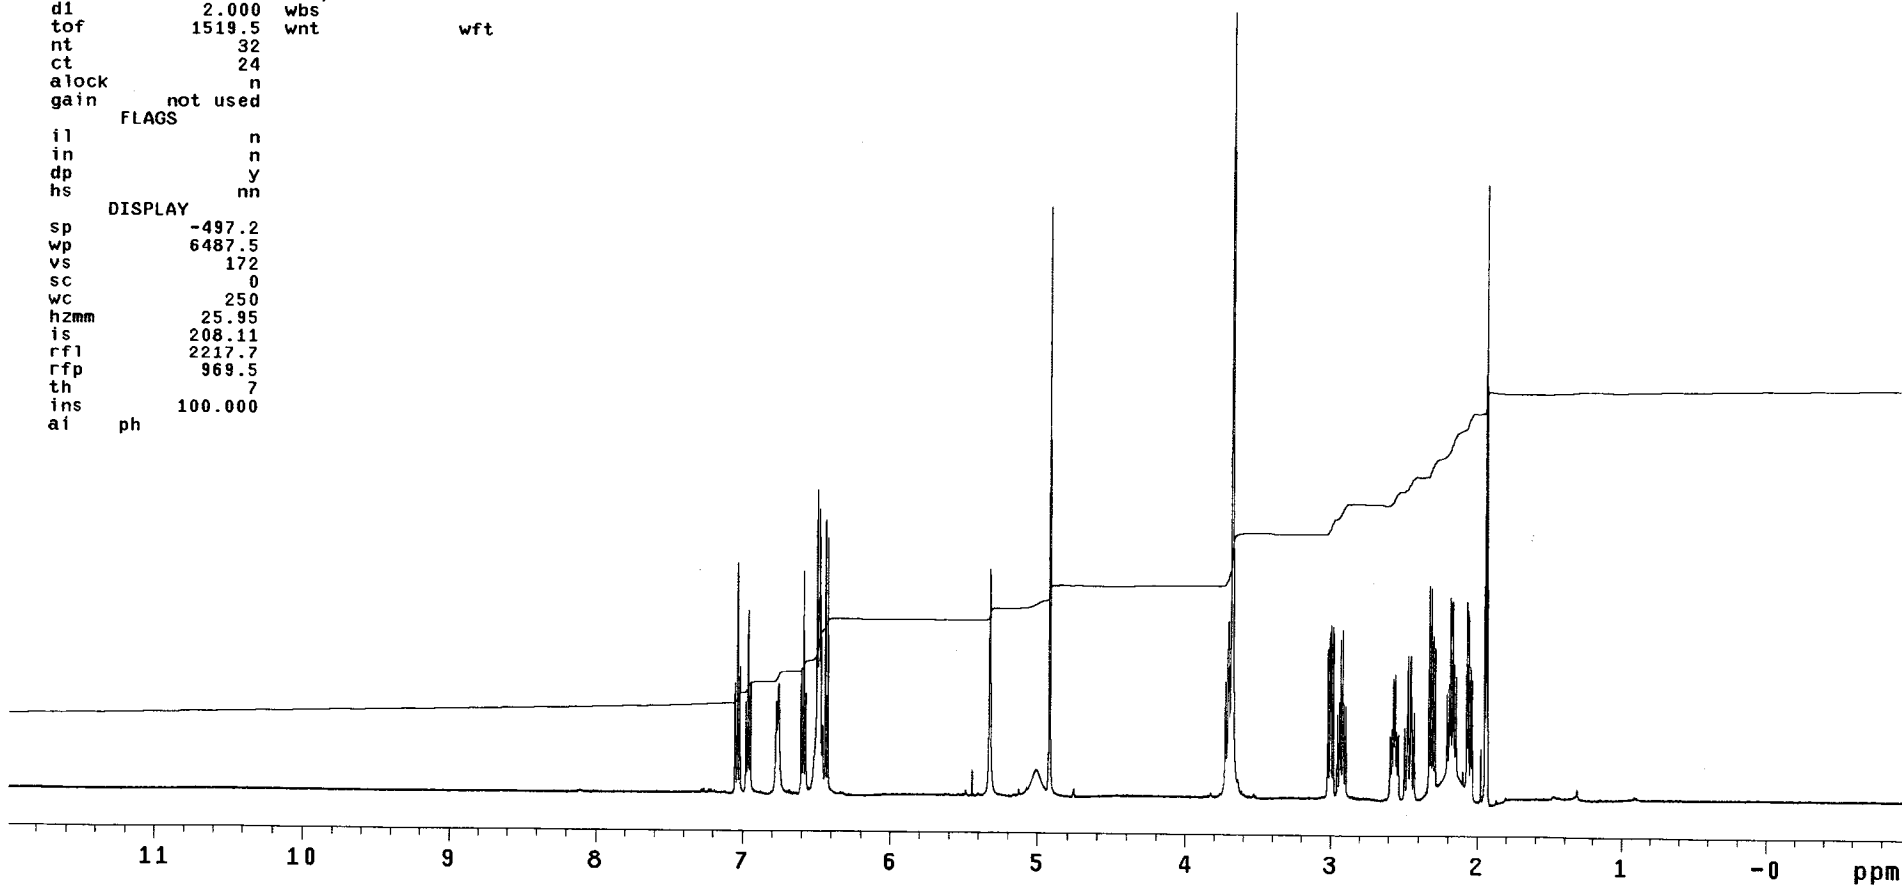

S141/S153

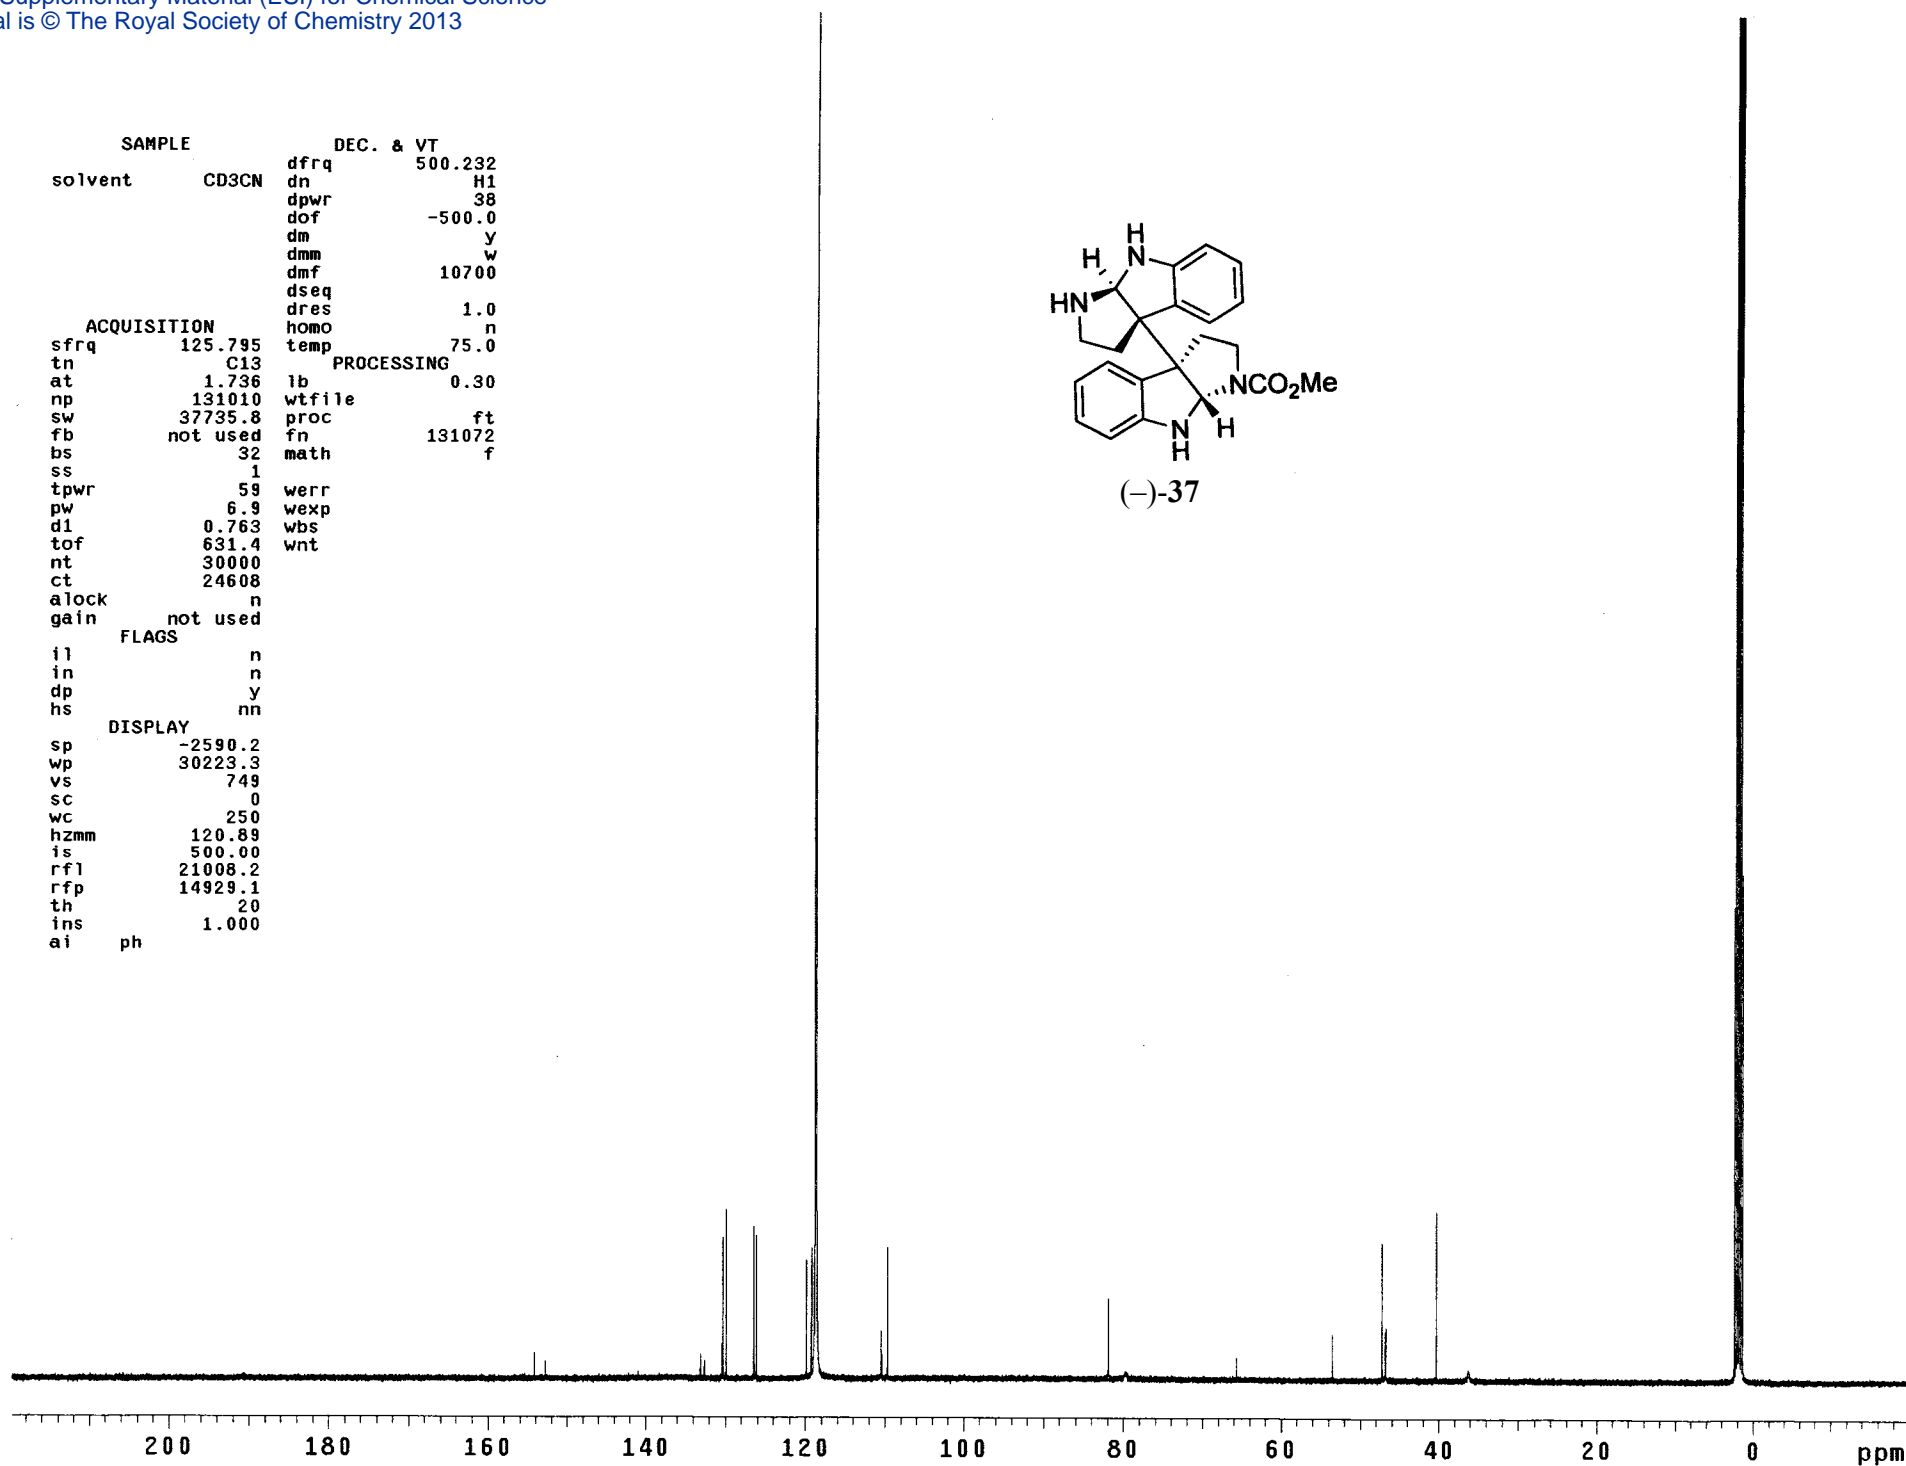

|             |          |            |         |
|-------------|----------|------------|---------|
| SAMPLE      |          | DEC. & VT  |         |
| solvent     | CDC13    | dfrq       | 125.672 |
|             |          | dn         | C13     |
|             |          | dpwr       | 30      |
|             |          | dof        | 0       |
|             |          | dm         | nnn     |
|             |          | dmm        | w       |
|             |          | dmf        | 10000   |
|             |          | dseq       |         |
|             |          | dres       | 1.0     |
|             |          | homo       | n       |
|             |          | temp       | 50.0    |
| ACQUISITION |          | PROCESSING |         |
| sfrq        | 499.746  | wtfile     |         |
| tn          | H1       | proc       | ft      |
| at          | 3.001    | fn         | 262144  |
| np          | 63050    | math       | f       |
| sw          | 10504.2  |            |         |
| fb          | not used |            |         |
| bs          | 4        | werr       |         |
| tpwr        | 56       | wexp       |         |
| pw          | 8.6      | wbs        |         |
| d1          | 2.000    | wnt        | wft     |
| tof         | 1519.5   |            |         |
| nt          | 16       |            |         |
| ct          | 12       |            |         |
| alock       | n        |            |         |
| gain        | not used |            |         |
| FLAGS       |          |            |         |
| il          | n        |            |         |
| in          | n        |            |         |
| dp          | y        |            |         |
| hs          | nn       |            |         |
| DISPLAY     |          |            |         |
| sp          | -499.8   |            |         |
| wp          | 6485.7   |            |         |
| vs          | 29       |            |         |
| sc          | 0        |            |         |
| wc          | 250      |            |         |
| hzmm        | 25.94    |            |         |
| is          | 89.53    |            |         |
| rfl         | 4865.4   |            |         |
| rfp         | 3618.1   |            |         |
| th          | 7        |            |         |
| ins         | 100.000  |            |         |
| ai          | ph       |            |         |

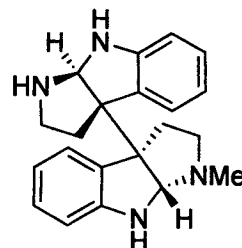

(-)-desmethyl-*meso*-chimonanthine (3)

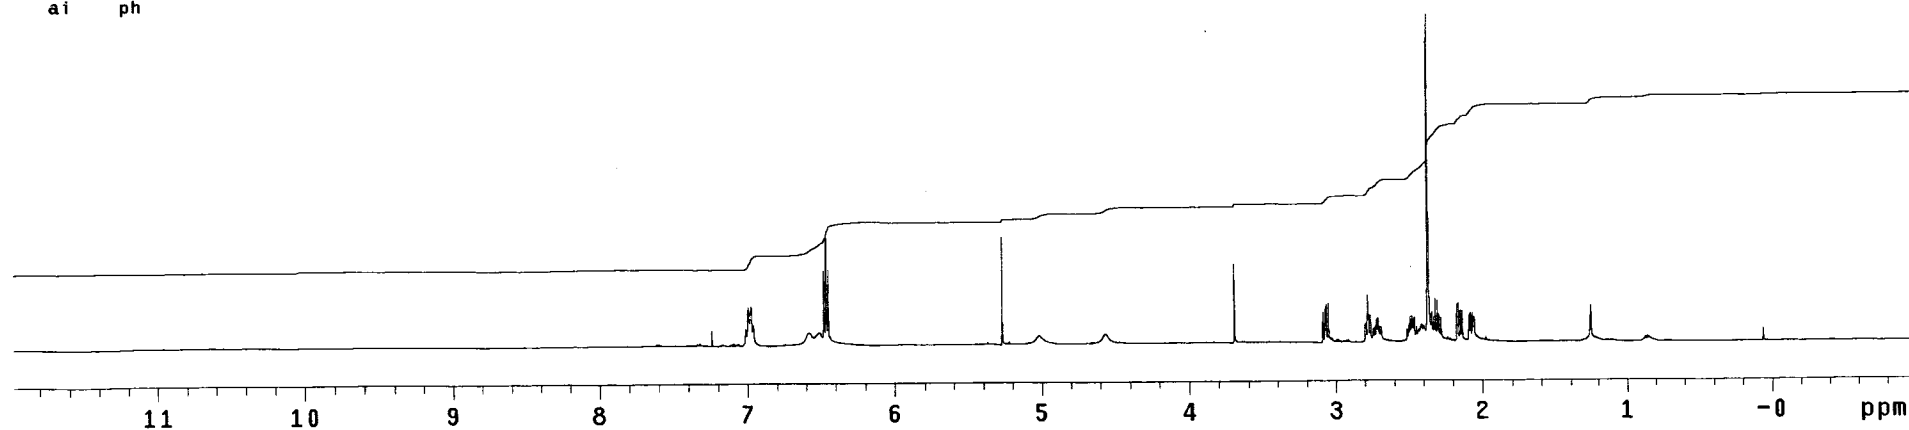

| SAMPLE      |          | DEC. & VT  |         |
|-------------|----------|------------|---------|
| solvent     | CDC13    | dfrq       | 500.229 |
|             |          | dn         | H1      |
|             |          | dpwr       | 39      |
|             |          | dof        | -500.0  |
|             |          | dm         | y       |
|             |          | dmm        | w       |
|             |          | dmf        | 10000   |
|             |          | dseq       |         |
|             |          | dres       | 1.0     |
|             |          | homo       | n       |
|             |          | temp       | 50.0    |
| ACQUISITION |          | PROCESSING |         |
| sfrq        | 125.795  | lb         | 0.30    |
| tn          | C13      | wtfile     |         |
| at          | 1.736    | proc       | ft      |
| np          | 131010   | fn         | 131072  |
| sw          | 37735.8  | math       | f       |
| fb          | not used |            |         |
| bs          | 64       |            |         |
| ss          | 1        | werr       |         |
| tpwr        | 58       | wexp       |         |
| pw          | 6.9      | wbs        |         |
| d1          | 0.763    | wnt        |         |
| tof         | 631.4    |            |         |
| nt          | 20000    |            |         |
| ct          | 16896    |            |         |
| alock       | n        |            |         |
| gain        | not used |            |         |
| FLAGS       |          |            |         |
| il          | n        |            |         |
| in          | n        |            |         |
| dp          | y        |            |         |
| hs          | nn       |            |         |
| DISPLAY     |          |            |         |
| sp          | -2551.6  |            |         |
| wp          | 30199.7  |            |         |
| vs          | 7875     |            |         |
| sc          | 0        |            |         |
| wc          | 250      |            |         |
| hzmm        | 120.80   |            |         |
| is          | 500.00   |            |         |
| rfl         | 15990.6  |            |         |
| rfp         | 9714.2   |            |         |
| th          | 20       |            |         |
| ins         | 1.000    |            |         |
| al          | ph       |            |         |

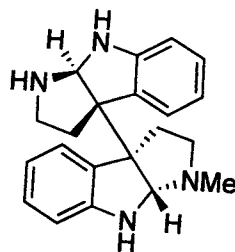

(-)-desmethyl-*meso*-chimonanthine (3)

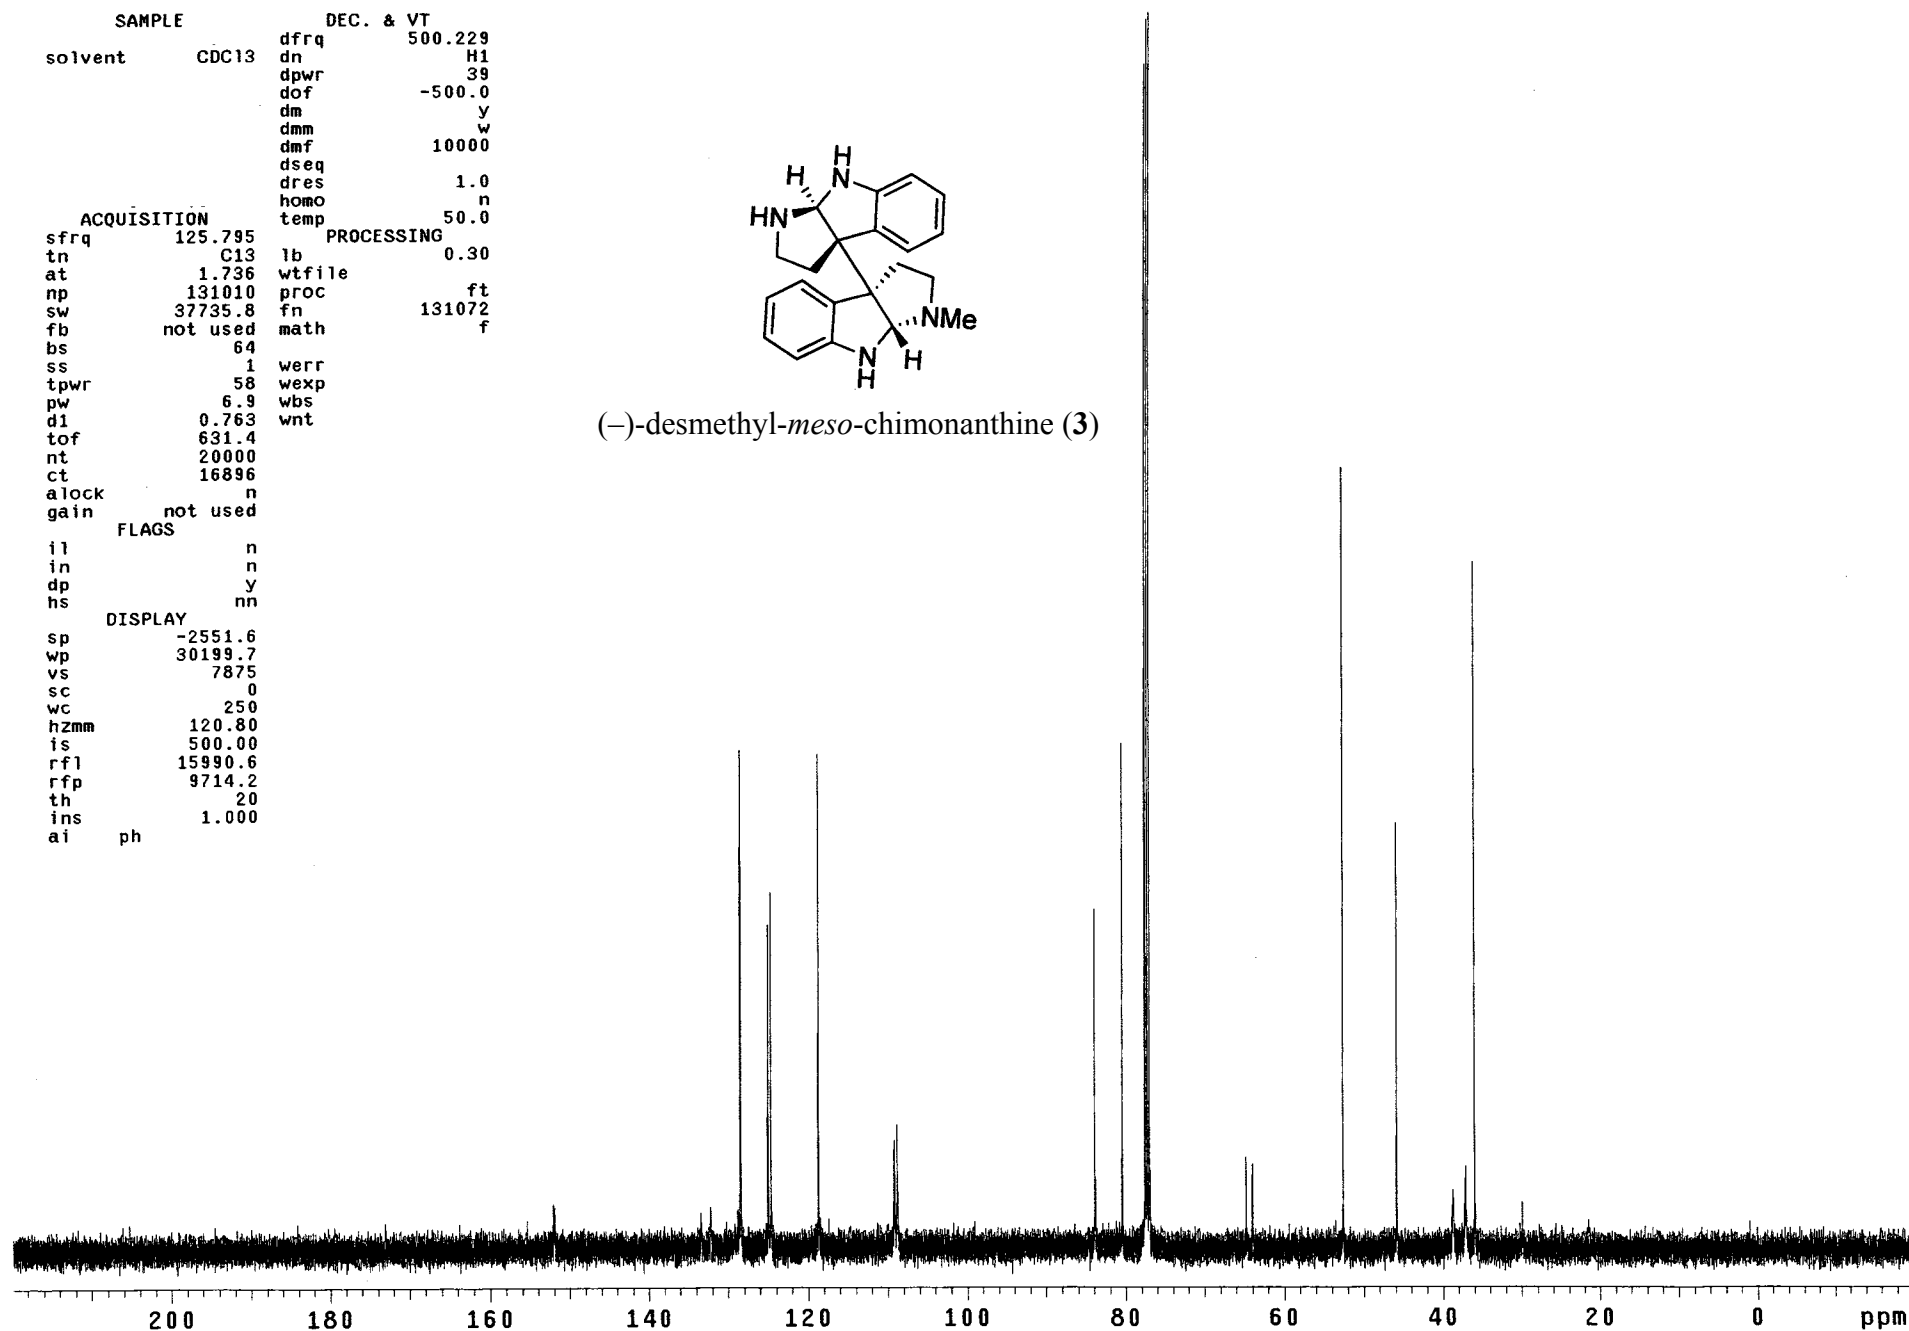

|             |          |            |         |
|-------------|----------|------------|---------|
| SAMPLE      |          | DEC. & VT  |         |
| solvent     | DMSO     | dfrq       | 125.673 |
|             |          | dn         | C13     |
|             |          | dpwr       | 30      |
|             |          | dof        | 0       |
|             |          | dm         | nnn     |
|             |          | dmm        | w       |
|             |          | dmf        | 10000   |
|             |          | dseq       |         |
|             |          | dres       | 1.0     |
|             |          | homo       | n       |
|             |          | temp       | 100.0   |
| ACQUISITION |          | PROCESSING |         |
| sfrq        | 499.748  | wtfile     |         |
| tn          | H1       | proc       | ft      |
| at          | 3.001    | fn         | 262144  |
| np          | 63050    | math       | f       |
| sw          | 10504.2  |            |         |
| fb          | not used |            |         |
| bs          | 8        | werr       |         |
| tpwr        | 56       | wexp       |         |
| pw          | 8.6      | wbs        |         |
| d1          | 2.000    | wnt        | wft     |
| tof         | 1519.5   |            |         |
| nt          | 32       |            |         |
| ct          | 24       |            |         |
| alock       | n        |            |         |
| gain        | not used |            |         |
| FLAGS       |          |            |         |
| il          | n        |            |         |
| in          | n        |            |         |
| dp          | y        |            |         |
| hs          | nn       |            |         |
| DISPLAY     |          |            |         |
| sp          | -497.9   |            |         |
| wp          | 6493.7   |            |         |
| vs          | 60       |            |         |
| sc          | 0        |            |         |
| wc          | 250      |            |         |
| hzmm        | 25.97    |            |         |
| is          | 107.81   |            |         |
| rfl         | 2478.7   |            |         |
| rfp         | 1249.4   |            |         |
| th          | 7        |            |         |
| ins         | 100.000  |            |         |
| ai          | ph       |            |         |

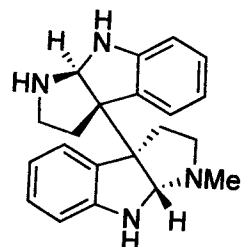

(-)-desmethyl-*meso*-chimonanthine (3)

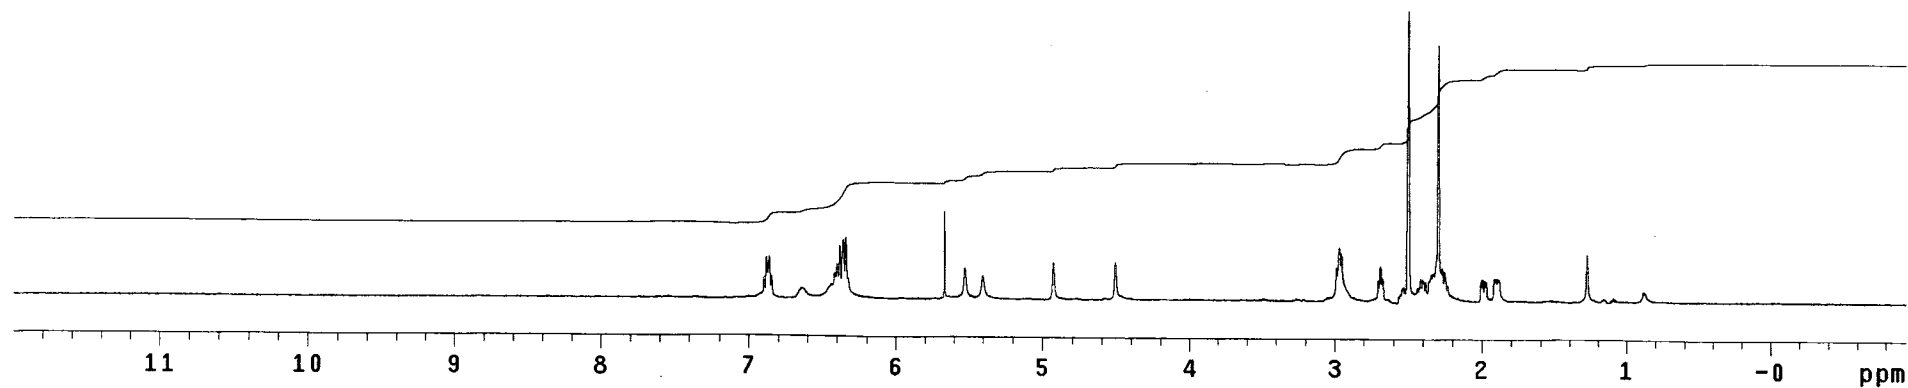



```

SAMPLE          DEC. & VT
solvent          DMSO    dfrq      500.232
                   dn      H1
                   dpwr     39
                   dof    -500.0
                   dm       y
                   dmm      w
                   dmf    10000
                   dseq
                   dres     1.0
                   homo     n
                   temp    100.0

ACQUISITION      PROCESSING
sfrq      125.795    lb      0.30
tn         C13      wtfile
at         1.736     proc
np        131010     fn      131072
sw        37735.8    math    f
fb        not used
bs         64
ss         1      werr
tpwr       58      wexp
pw         6.9     wbs
d1         0.763    wnt
tof        631.4
nt        25000
ct        17600
alock      n
gain      not used

FLAGS
il         n
in         n
dp         y
hs         nn

DISPLAY
sp         -2573.9
wp         30257.3
vs         10088
sc         0
wc         250
hzmm       121.03
is         500.00
rfl        11412.4
rfp        4969.7
th         20
ins        1.000
ai         ph

```

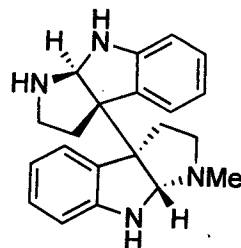

(-)-desmethyl-*meso*-chimonanthine (3)

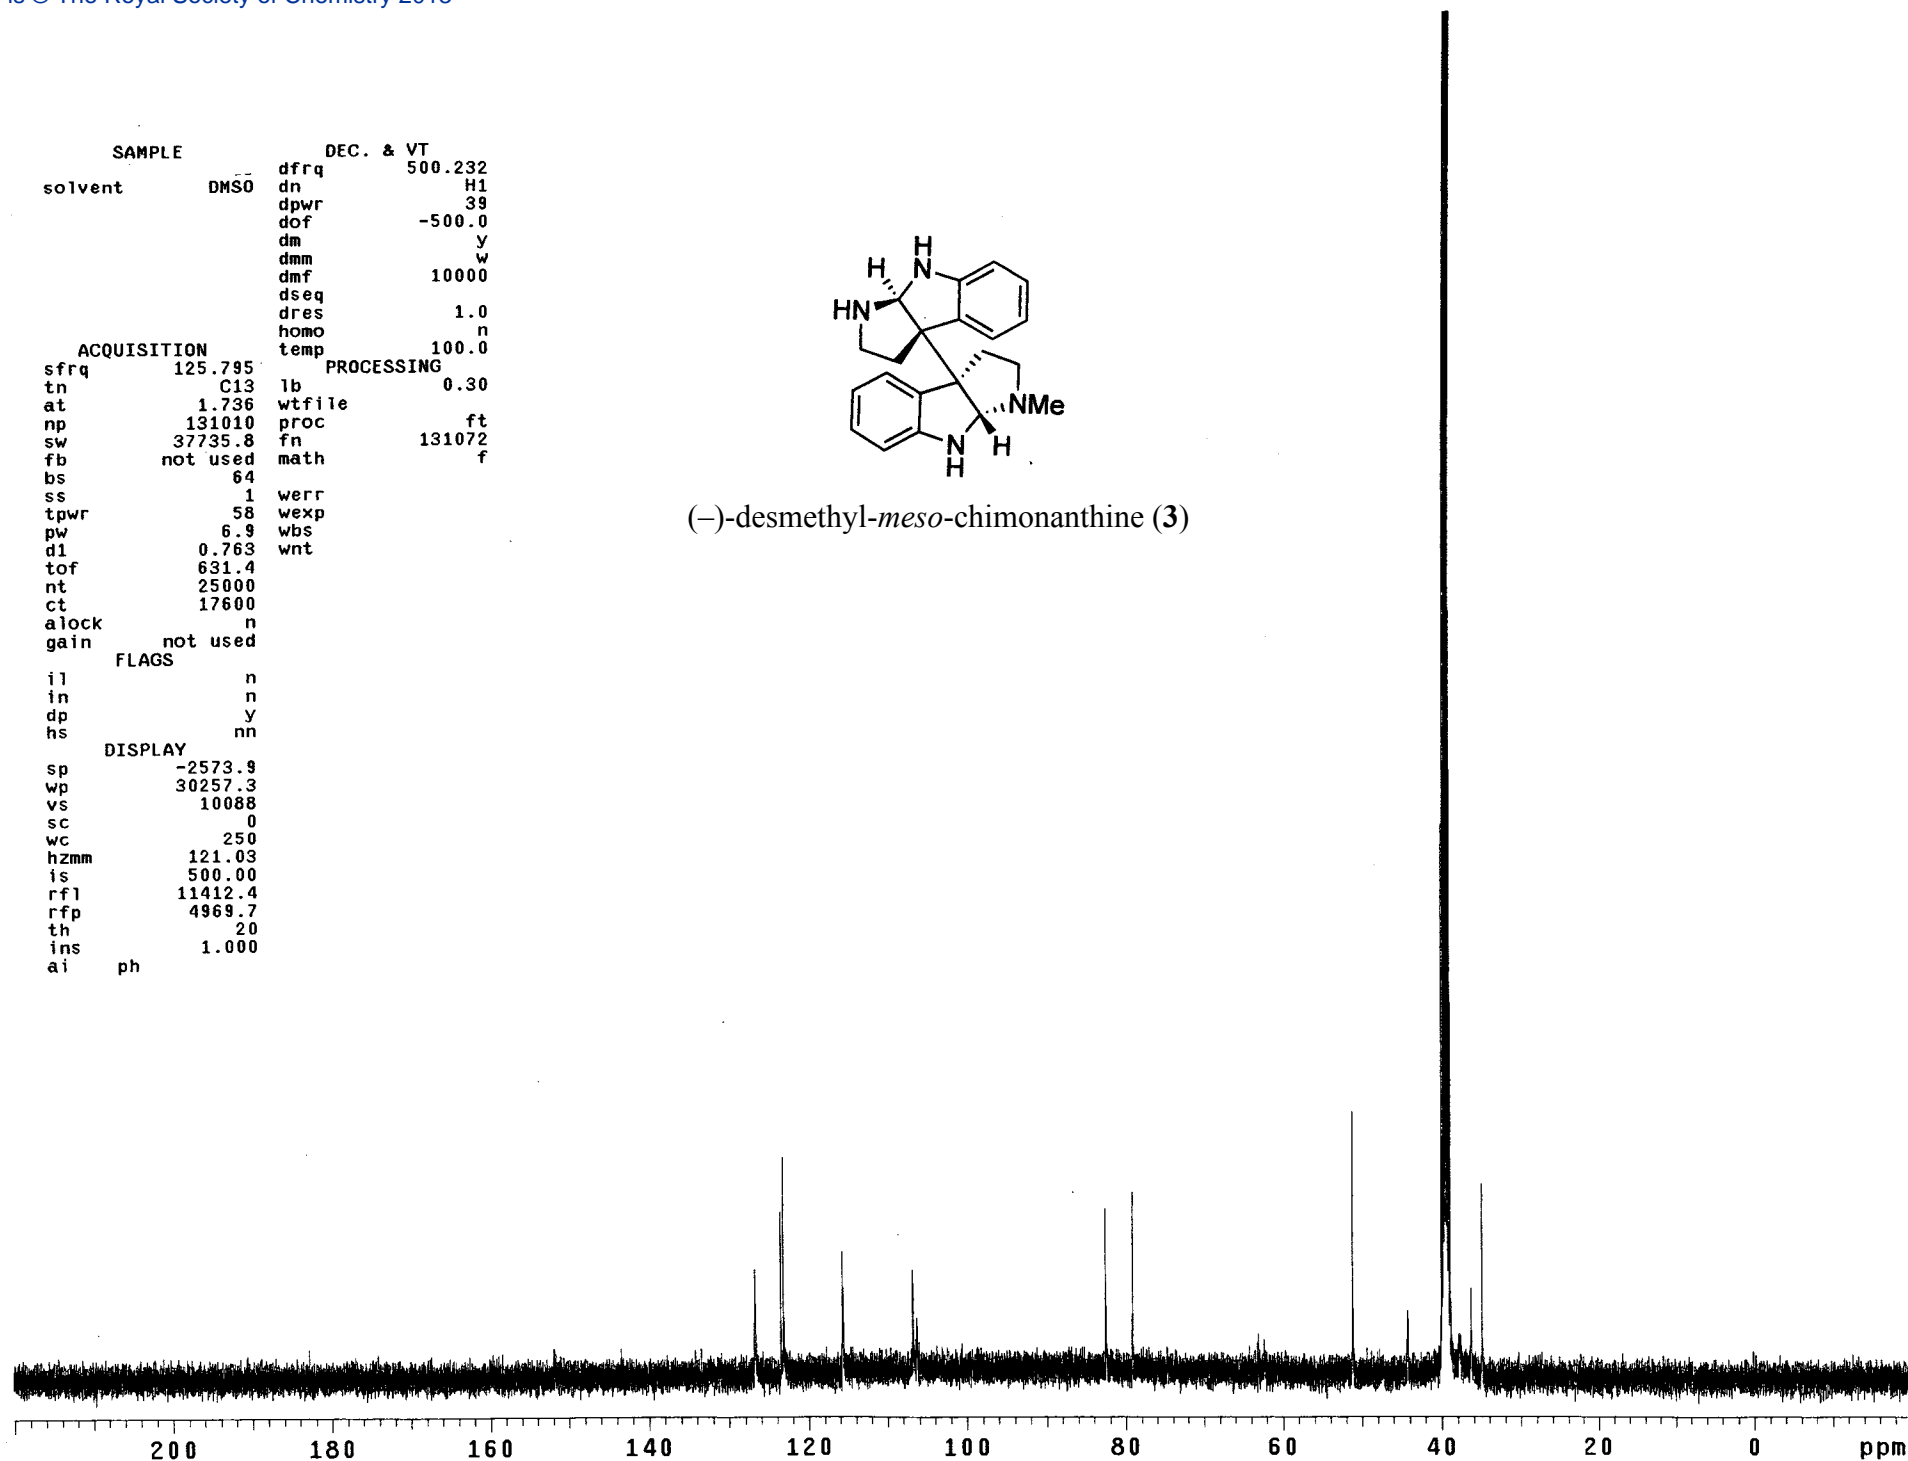

|             |          |            |         |
|-------------|----------|------------|---------|
| SAMPLE      |          | DEC. & VT  |         |
| solvent     | CDC13    | dfrq       | 125.794 |
|             |          | dn         | C13     |
|             |          | dpwr       | 39      |
|             |          | dof        | 0       |
|             |          | dm         | nnn     |
|             |          | dmm        | c       |
|             |          | dmf        | 10000   |
|             |          | dseq       |         |
|             |          | dres       | 1.0     |
|             |          | homo       | n       |
|             |          | temp       | -40.0   |
| ACQUISITION |          | PROCESSING |         |
| sfrq        | 500.231  | wtfile     |         |
| tn          | H1       | proc       | ft      |
| at          | 3.200    | fn         | 131072  |
| np          | 64000    | math       | f       |
| sw          | 10000.0  |            |         |
| fb          | not used |            |         |
| bs          | 4        | werr       |         |
| ss          | 1        | wexp       |         |
| tpwr        | 60       | wbs        |         |
| pw          | 9.0      | wnt        |         |
| d1          | 1.800    |            |         |
| tof         | 1498.2   |            |         |
| nt          | 16       |            |         |
| ct          | 16       |            |         |
| alock       | n        |            |         |
| gain        | not used |            |         |
| FLAGS       |          |            |         |
| il          | n        |            |         |
| in          | n        |            |         |
| dp          | y        |            |         |
| hs          | nn       |            |         |
| DISPLAY     |          |            |         |
| sp          | -511.7   |            |         |
| wp          | 6503.3   |            |         |
| vs          | 307      |            |         |
| sc          | 0        |            |         |
| wc          | 250      |            |         |
| hzmm        | 26.01    |            |         |
| is          | 200.00   |            |         |
| rfl         | 4630.7   |            |         |
| rfp         | 3621.6   |            |         |
| th          | 7        |            |         |
| ins         | 1.000    |            |         |
| ai          | ph       |            |         |

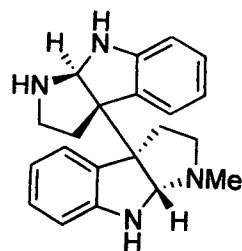

(-)-desmethyl-*meso*-chimonanthine (3)

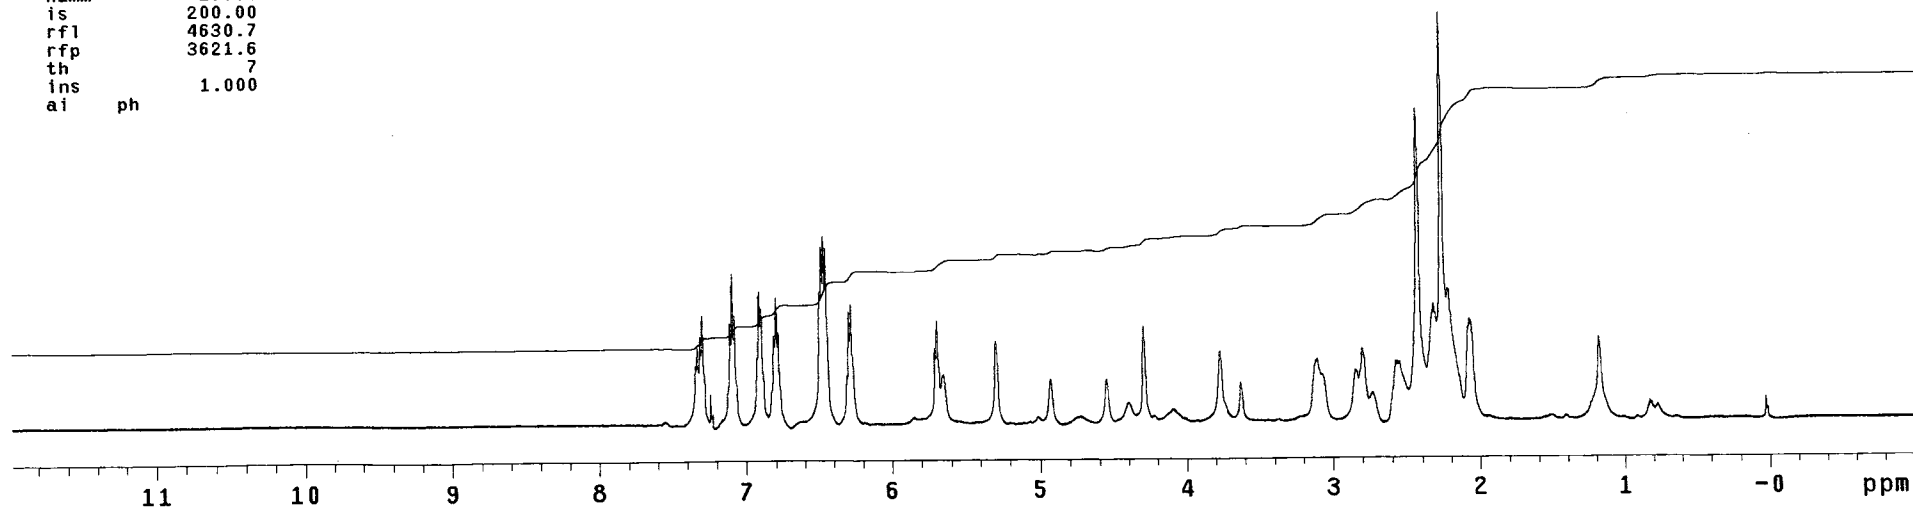

|             |          |            |         |
|-------------|----------|------------|---------|
| SAMPLE      |          | DEC. & VT  |         |
| solvent     | CDC13    | dfrq       | 500.229 |
|             |          | dn         | H1      |
|             |          | dpwr       | 39      |
|             |          | dof        | -500.0  |
|             |          | dm         | y       |
|             |          | dmm        | w       |
|             |          | dmf        | 10000   |
|             |          | dseq       |         |
|             |          | dres       | 1.0     |
|             |          | homo       | n       |
|             |          | temp       | -40.0   |
| ACQUISITION |          | PROCESSING |         |
| sfrq        | 125.795  | lb         | 0.30    |
| tn          | C13      | wtfile     |         |
| at          | 1.736    | proc       | ft      |
| np          | 131010   | fn         | 131072  |
| sw          | 37735.8  | math       | f       |
| fb          | not used |            |         |
| bs          | 32       |            |         |
| ss          | 1        | werr       |         |
| tpwr        | 58       | wexp       |         |
| pw          | 6.9      | wbs        |         |
| d1          | 0.763    | wnt        |         |
| tof         | 631.4    |            |         |
| nt          | 15000    |            |         |
| ct          | 4256     |            |         |
| alock       | n        |            |         |
| gain        | not used |            |         |
| FLAGS       |          |            |         |
| il          | n        |            |         |
| in          | n        |            |         |
| dp          | y        |            |         |
| hs          | nn       |            |         |
| DISPLAY     |          |            |         |
| sp          | -2539.0  |            |         |
| wp          | 30199.7  |            |         |
| vs          | 2273     |            |         |
| sc          | 0        |            |         |
| wc          | 250      |            |         |
| hzmm        | 120.80   |            |         |
| is          | 500.00   |            |         |
| rfl         | 16036.4  |            |         |
| rfp         | 9714.9   |            |         |
| th          | 20       |            |         |
| ins         | 1.000    |            |         |
| ai          | ph       |            |         |

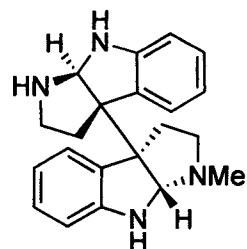

(-)-desmethyl-*meso*-chimonanthine (3)

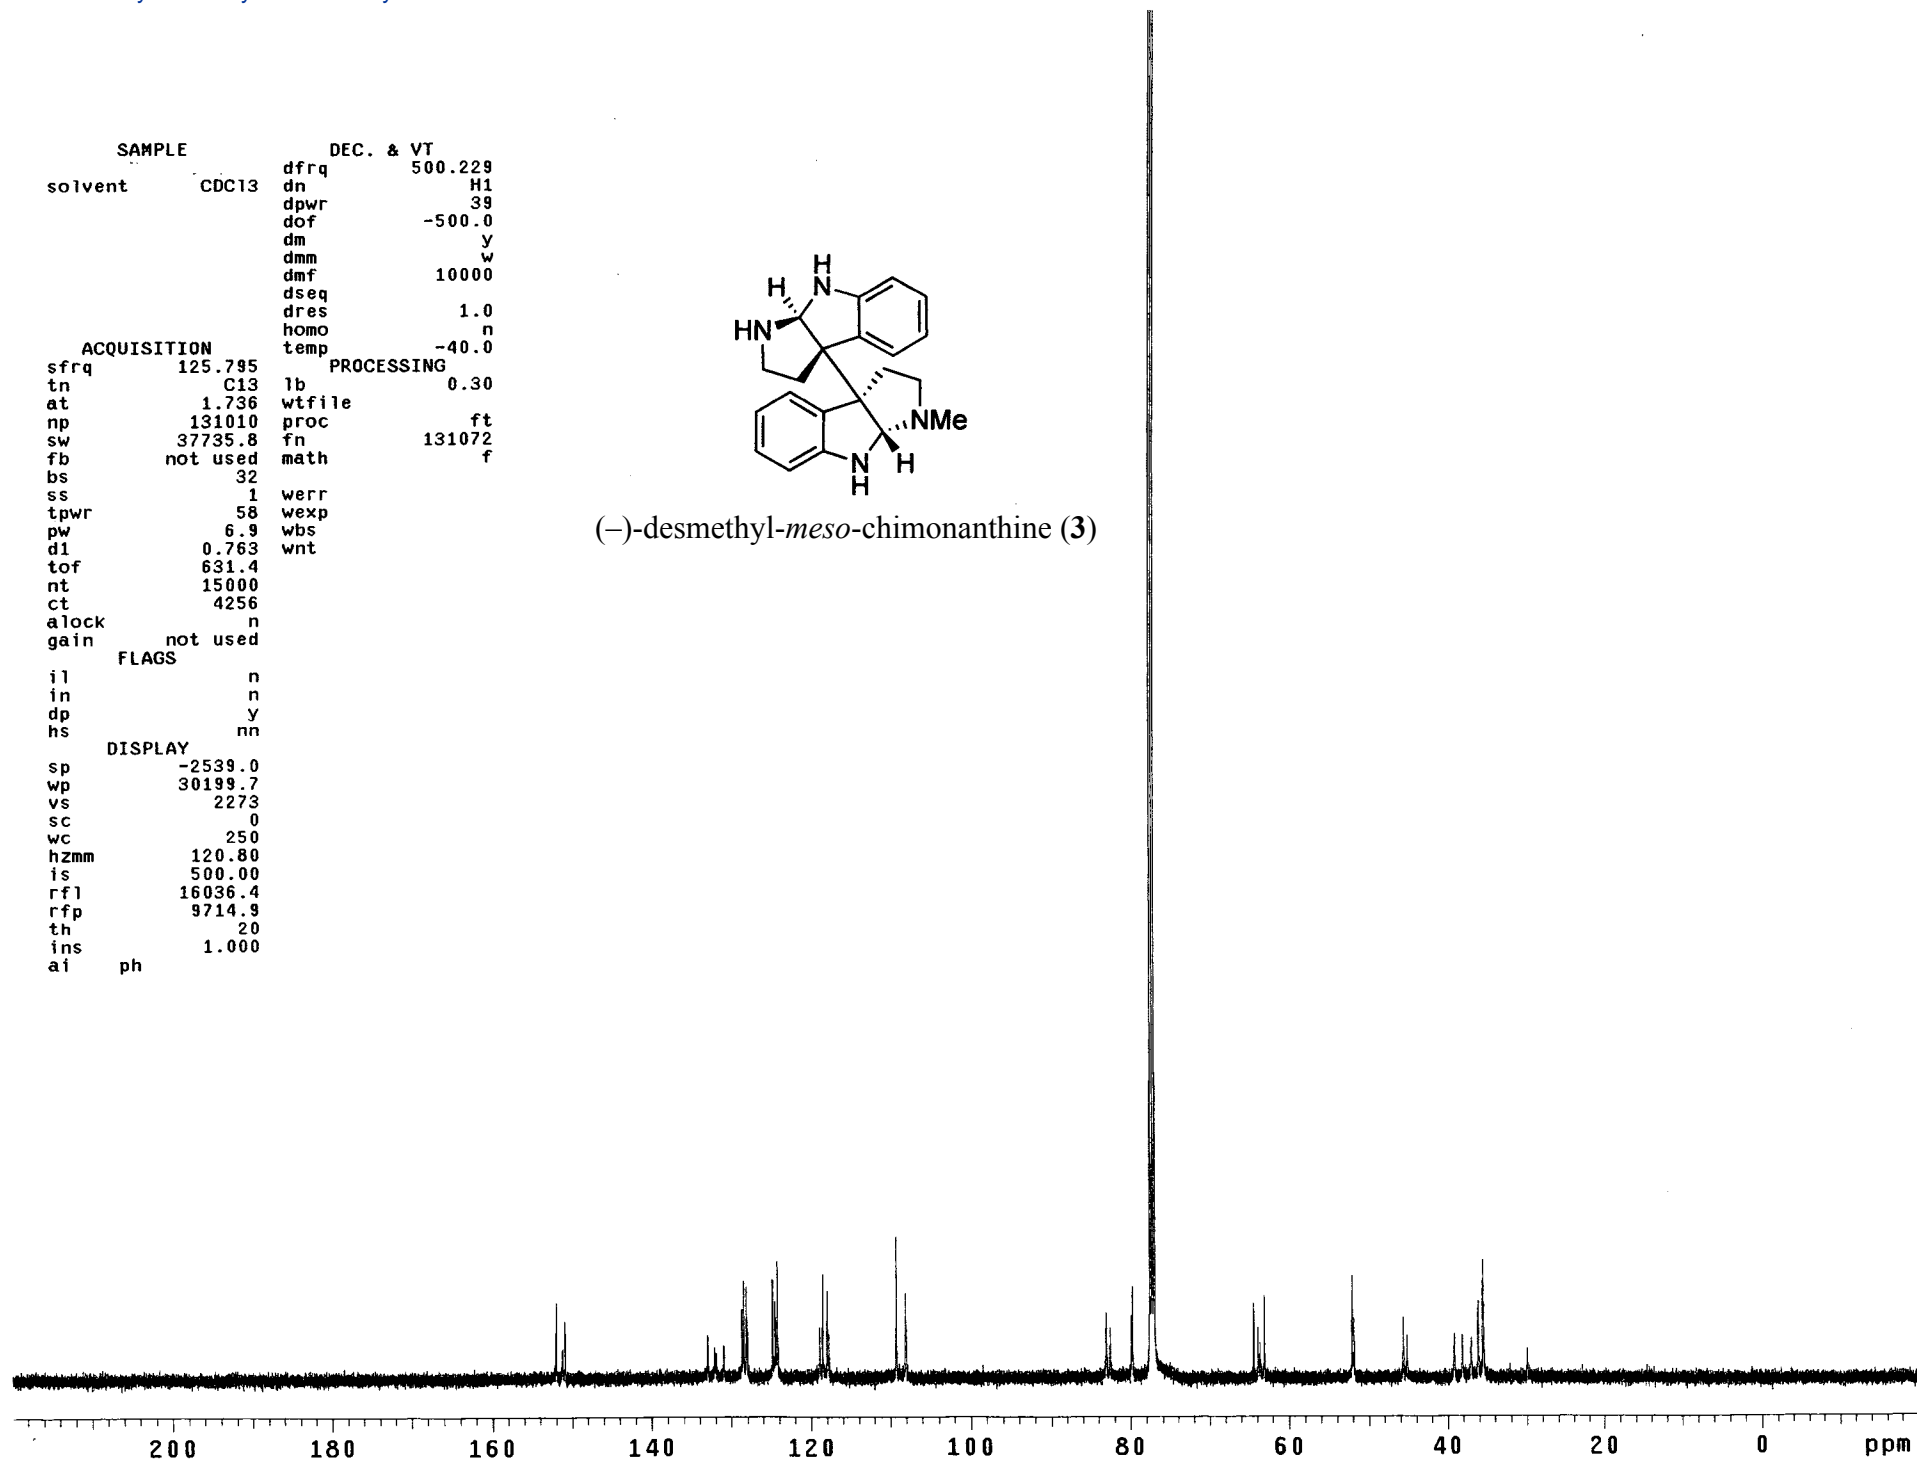

S148/S153

|             |          |            |         |
|-------------|----------|------------|---------|
| SAMPLE      |          | DEC. & VT  |         |
| solvent     | DMSO     | dfrq       | 125.673 |
|             |          | dn         | C13     |
|             |          | dpwr       | 30      |
|             |          | dof        | 0       |
|             |          | dm         | nnn     |
|             |          | dmm        | w       |
|             |          | dmf        | 10000   |
|             |          | dseq       |         |
|             |          | dres       | 1.0     |
|             |          | homo       | n       |
|             |          | temp       | 80.0    |
| ACQUISITION |          | PROCESSING |         |
| sfrq        | 499.748  | wtfile     |         |
| tn          | H1       | proc       | ft      |
| at          | 3.001    | fn         | 262144  |
| np          | 63050    | math       | f       |
| sw          | 10504.2  |            |         |
| fb          | not used |            |         |
| bs          | 4        |            |         |
| tpwr        | 56       | werr       |         |
| pw          | 8.6      | wexp       |         |
| dl          | 2.000    | wbs        |         |
| tof         | 1519.5   | wnt        | wft     |
| nt          | 32       |            |         |
| ct          | 24       |            |         |
| alock       | n        |            |         |
| gain        | not used |            |         |
| FLAGS       |          |            |         |
| il          | n        |            |         |
| in          | n        |            |         |
| dp          | y        |            |         |
| hs          | nn       |            |         |
| DISPLAY     |          |            |         |
| sp          | -515.7   |            |         |
| wp          | 6508.8   |            |         |
| vs          | 66       |            |         |
| sc          | 0        |            |         |
| wc          | 250      |            |         |
| hzmm        | 26.04    |            |         |
| is          | 254.60   |            |         |
| rfl         | 2477.9   |            |         |
| rfp         | 1249.4   |            |         |
| th          | 7        |            |         |
| ins         | 100.000  |            |         |
| al          | ph       |            |         |

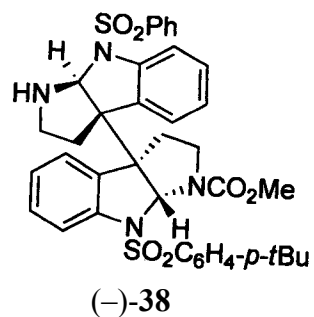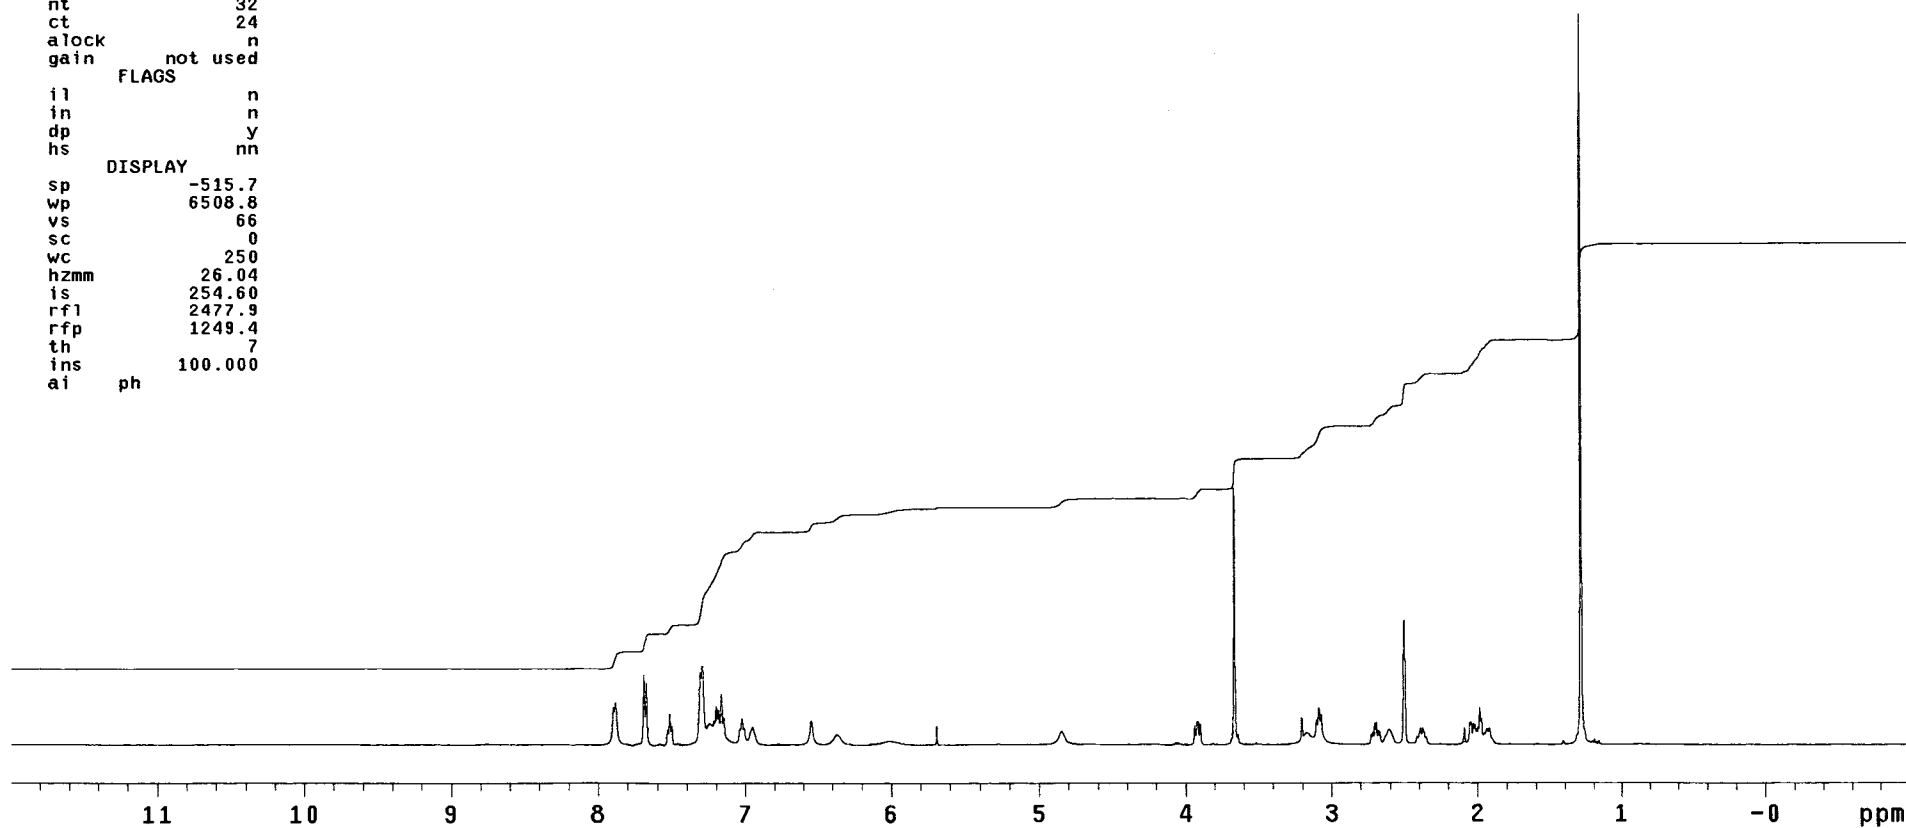

|             |          |            |         |
|-------------|----------|------------|---------|
| SAMPLE      |          | DEC. & VT  |         |
| solvent     | DMSO     | dfrq       | 500.232 |
|             |          | dn         | H1      |
|             |          | dpwr       | 39      |
|             |          | dof        | -500.0  |
|             |          | dm         | y       |
|             |          | dmm        | w       |
|             |          | dmf        | 10000   |
|             |          | dseq       |         |
|             |          | dres       | 1.0     |
|             |          | homo       | n       |
|             |          | temp       | 80.0    |
| ACQUISITION |          | PROCESSING |         |
| sfrq        | 125.795  | lb         | 0.30    |
| tn          | C13      | wtfile     |         |
| at          | 1.736    | proc       | ft      |
| np          | 131010   | fn         | 131072  |
| sw          | 37735.8  | math       | f       |
| fb          | not used |            |         |
| bs          | 64       |            |         |
| ss          | 1        |            |         |
| tpwr        | 58       | werr       |         |
| pw          | 6.9      | wexp       |         |
| d1          | 0.763    | wbs        |         |
| tof         | 631.4    | wnt        |         |
| nt          | 25000    |            |         |
| ct          | 16448    |            |         |
| alock       | n        |            |         |
| gain        | not used |            |         |
| FLAGS       |          |            |         |
| il          | n        |            |         |
| in          | n        |            |         |
| dp          | y        |            |         |
| hs          | nn       |            |         |
| DISPLAY     |          |            |         |
| sp          | -2554.9  |            |         |
| wp          | 30221.6  |            |         |
| vs          | 2340     |            |         |
| sc          | 0        |            |         |
| wc          | 250      |            |         |
| hzmm        | 120.89   |            |         |
| is          | 500.00   |            |         |
| rfl         | 11399.8  |            |         |
| rfp         | 4969.7   |            |         |
| th          | 20       |            |         |
| ins         | 1.000    |            |         |
| ai          | ph       |            |         |

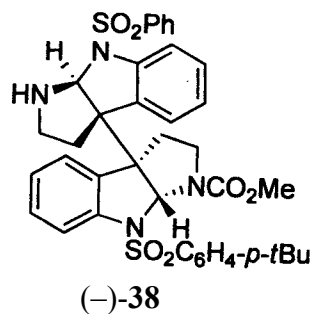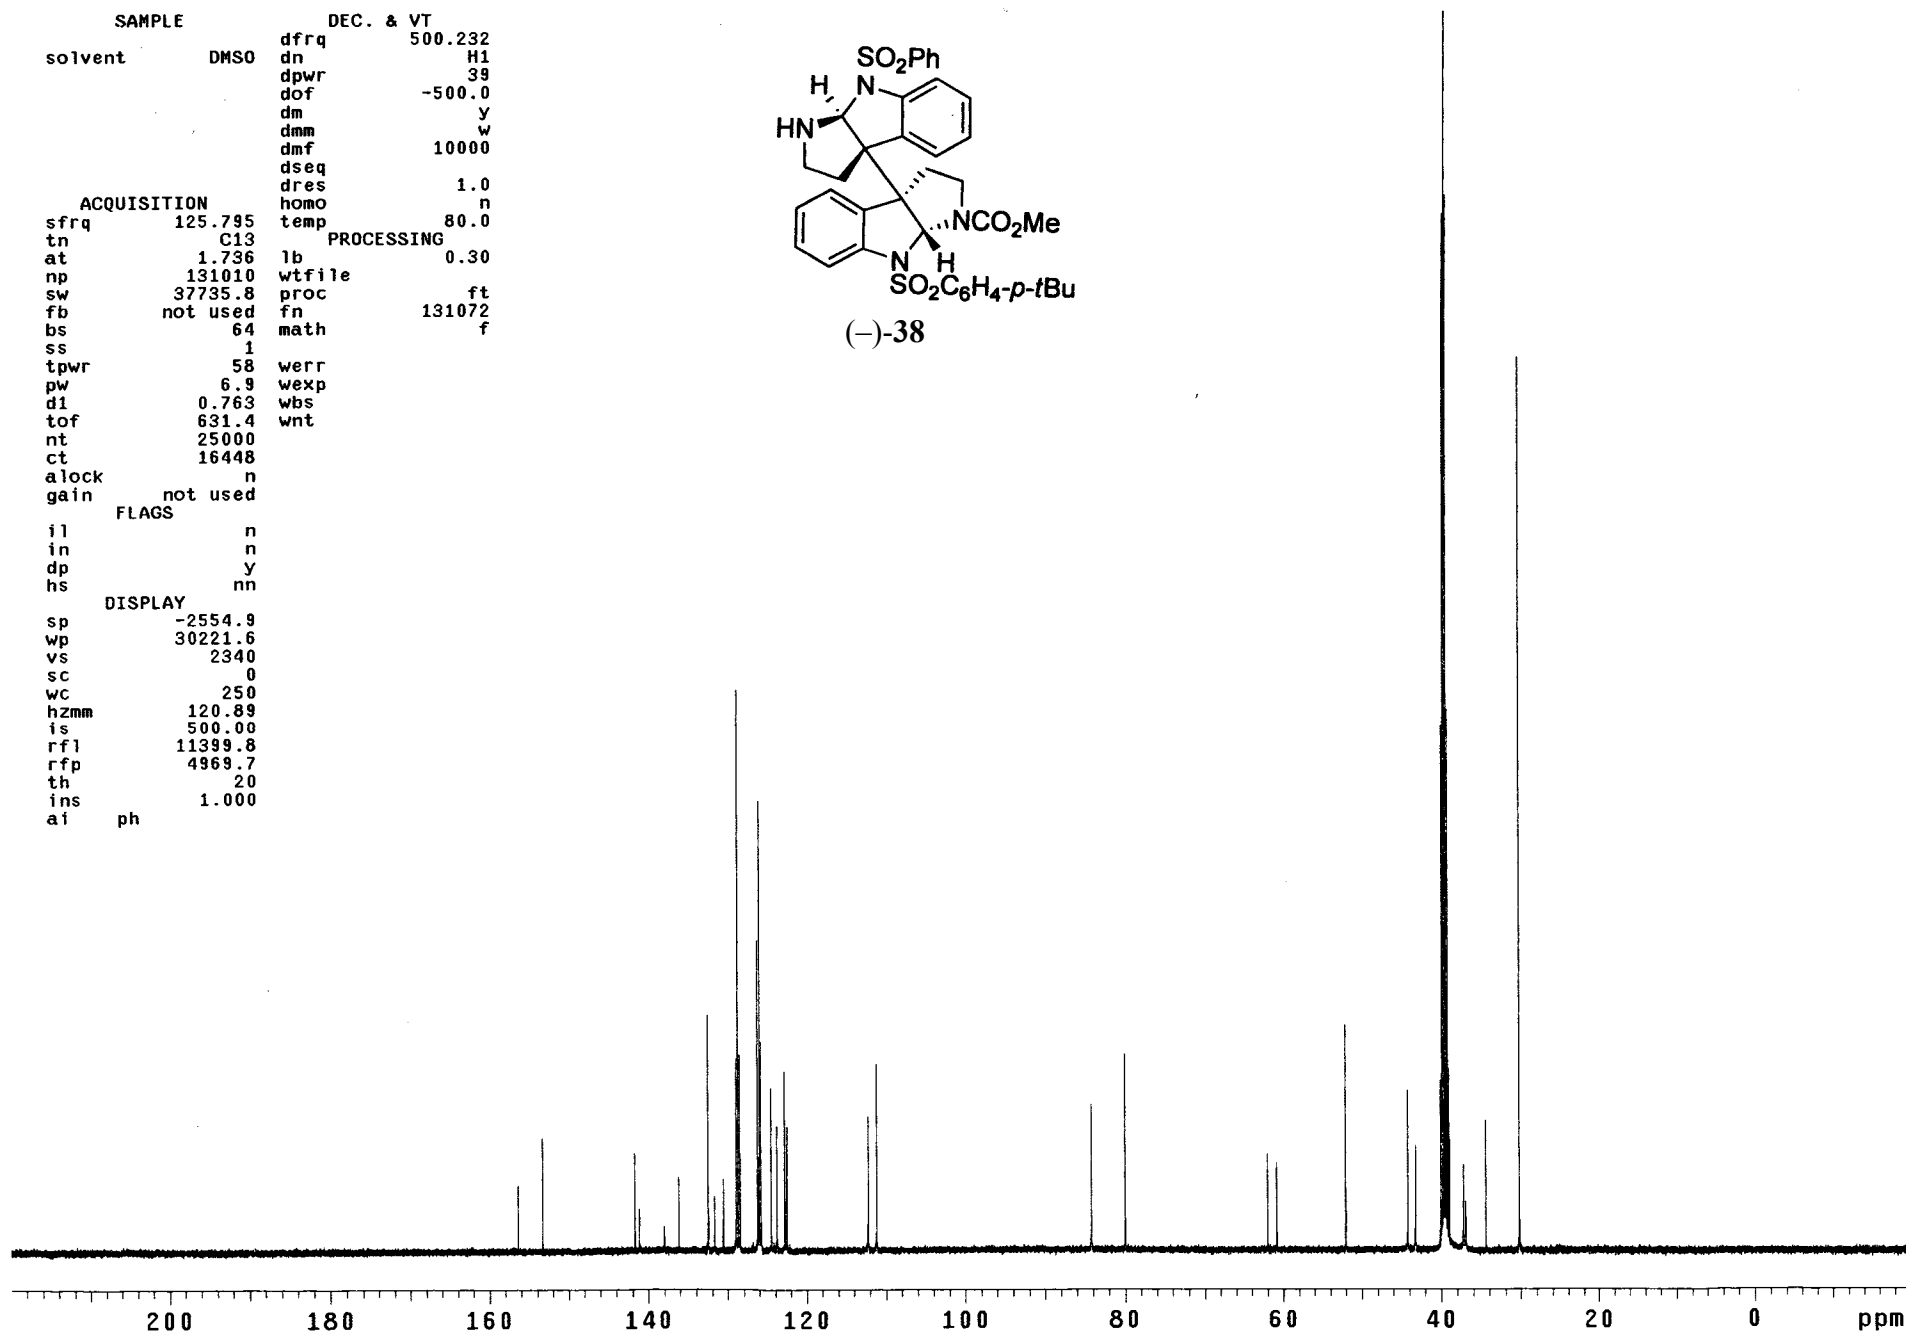

S150/S153

| SAMPLE      |          | DEC. & VT  |         |
|-------------|----------|------------|---------|
| solvent     | CD3CN    | dfrq       | 125.673 |
|             |          | dn         | C13     |
|             |          | dpwr       | 30      |
|             |          | dof        | 0       |
|             |          | dm         | nnn     |
|             |          | dmm        | w       |
|             |          | dmf        | 10000   |
|             |          | dseq       |         |
|             |          | dres       | 1.0     |
|             |          | homo       | n       |
|             |          | temp       | 70.0    |
| ACQUISITION |          | PROCESSING |         |
| sfrq        | 499.748  | wtfile     |         |
| tn          | H1       | proc       | ft      |
| at          | 3.001    | fn         | 262144  |
| np          | 63050    | math       | f       |
| sw          | 10504.2  |            |         |
| fb          | not used |            |         |
| bs          | 8        | werr       |         |
| tpwr        | 56       | wexp       |         |
| pw          | 8.6      | wbs        |         |
| d1          | 2.000    | wnt        | wft     |
| tof         | 1519.5   |            |         |
| nt          | 32       |            |         |
| ct          | 32       |            |         |
| alock       | n        |            |         |
| gain        | not used |            |         |
| FLAGS       |          |            |         |
| il          | n        |            |         |
| in          | n        |            |         |
| dp          | y        |            |         |
| hs          | nn       |            |         |
| DISPLAY     |          |            |         |
| sp          | -497.6   |            |         |
| wp          | 6490.0   |            |         |
| vs          | 24       |            |         |
| sc          | 0        |            |         |
| wc          | 250      |            |         |
| hzmm        | 25.96    |            |         |
| ls          | 151.08   |            |         |
| rfl         | 2217.4   |            |         |
| rfp         | 969.5    |            |         |
| th          | 7        |            |         |
| ins         | 100.000  |            |         |
| ai          | ph       |            |         |

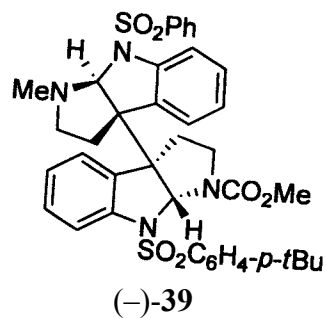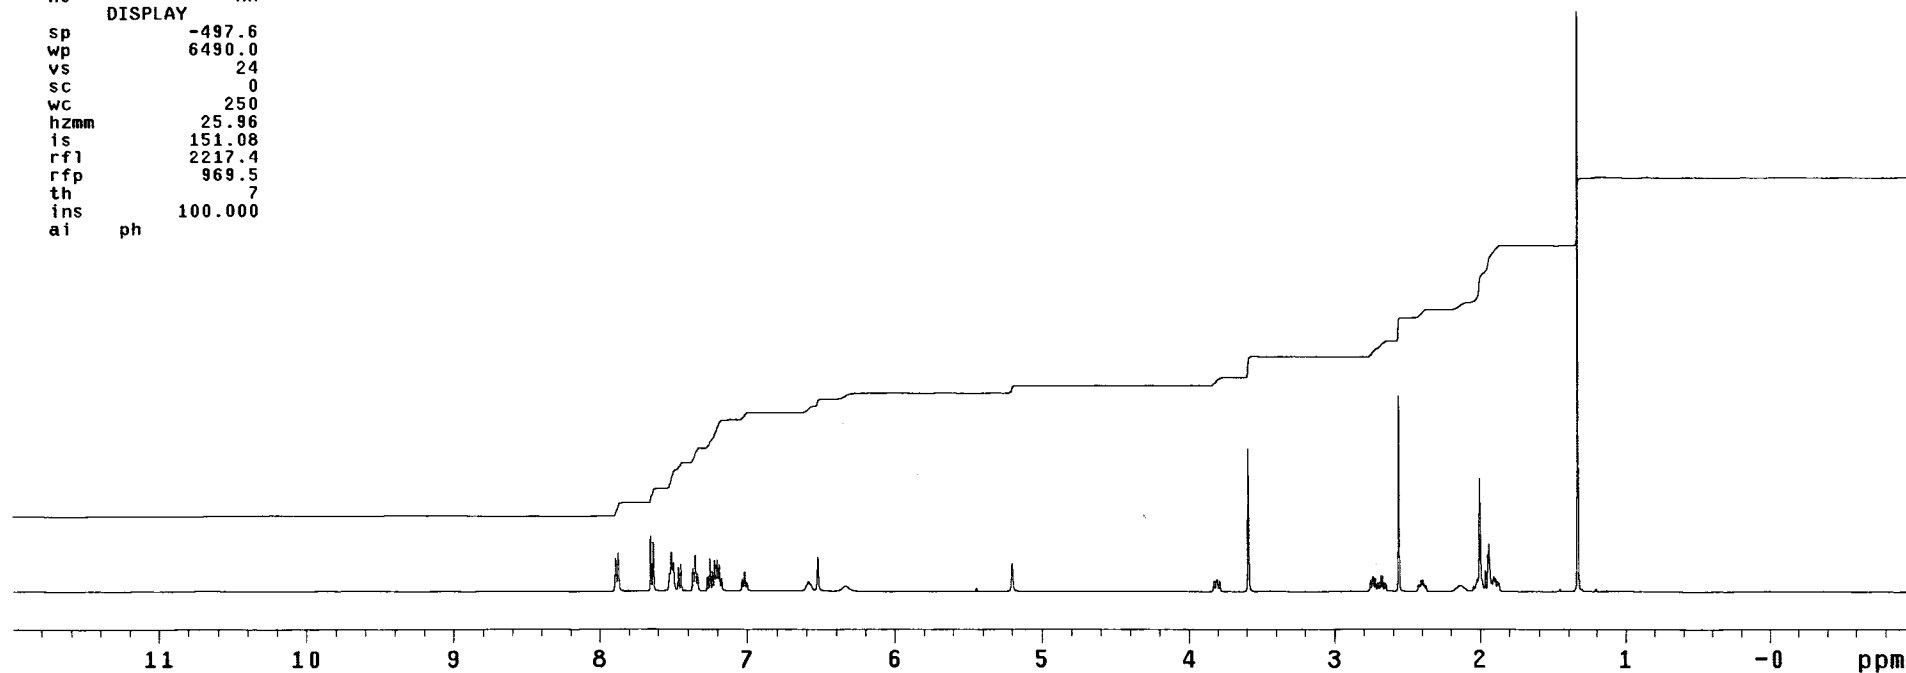

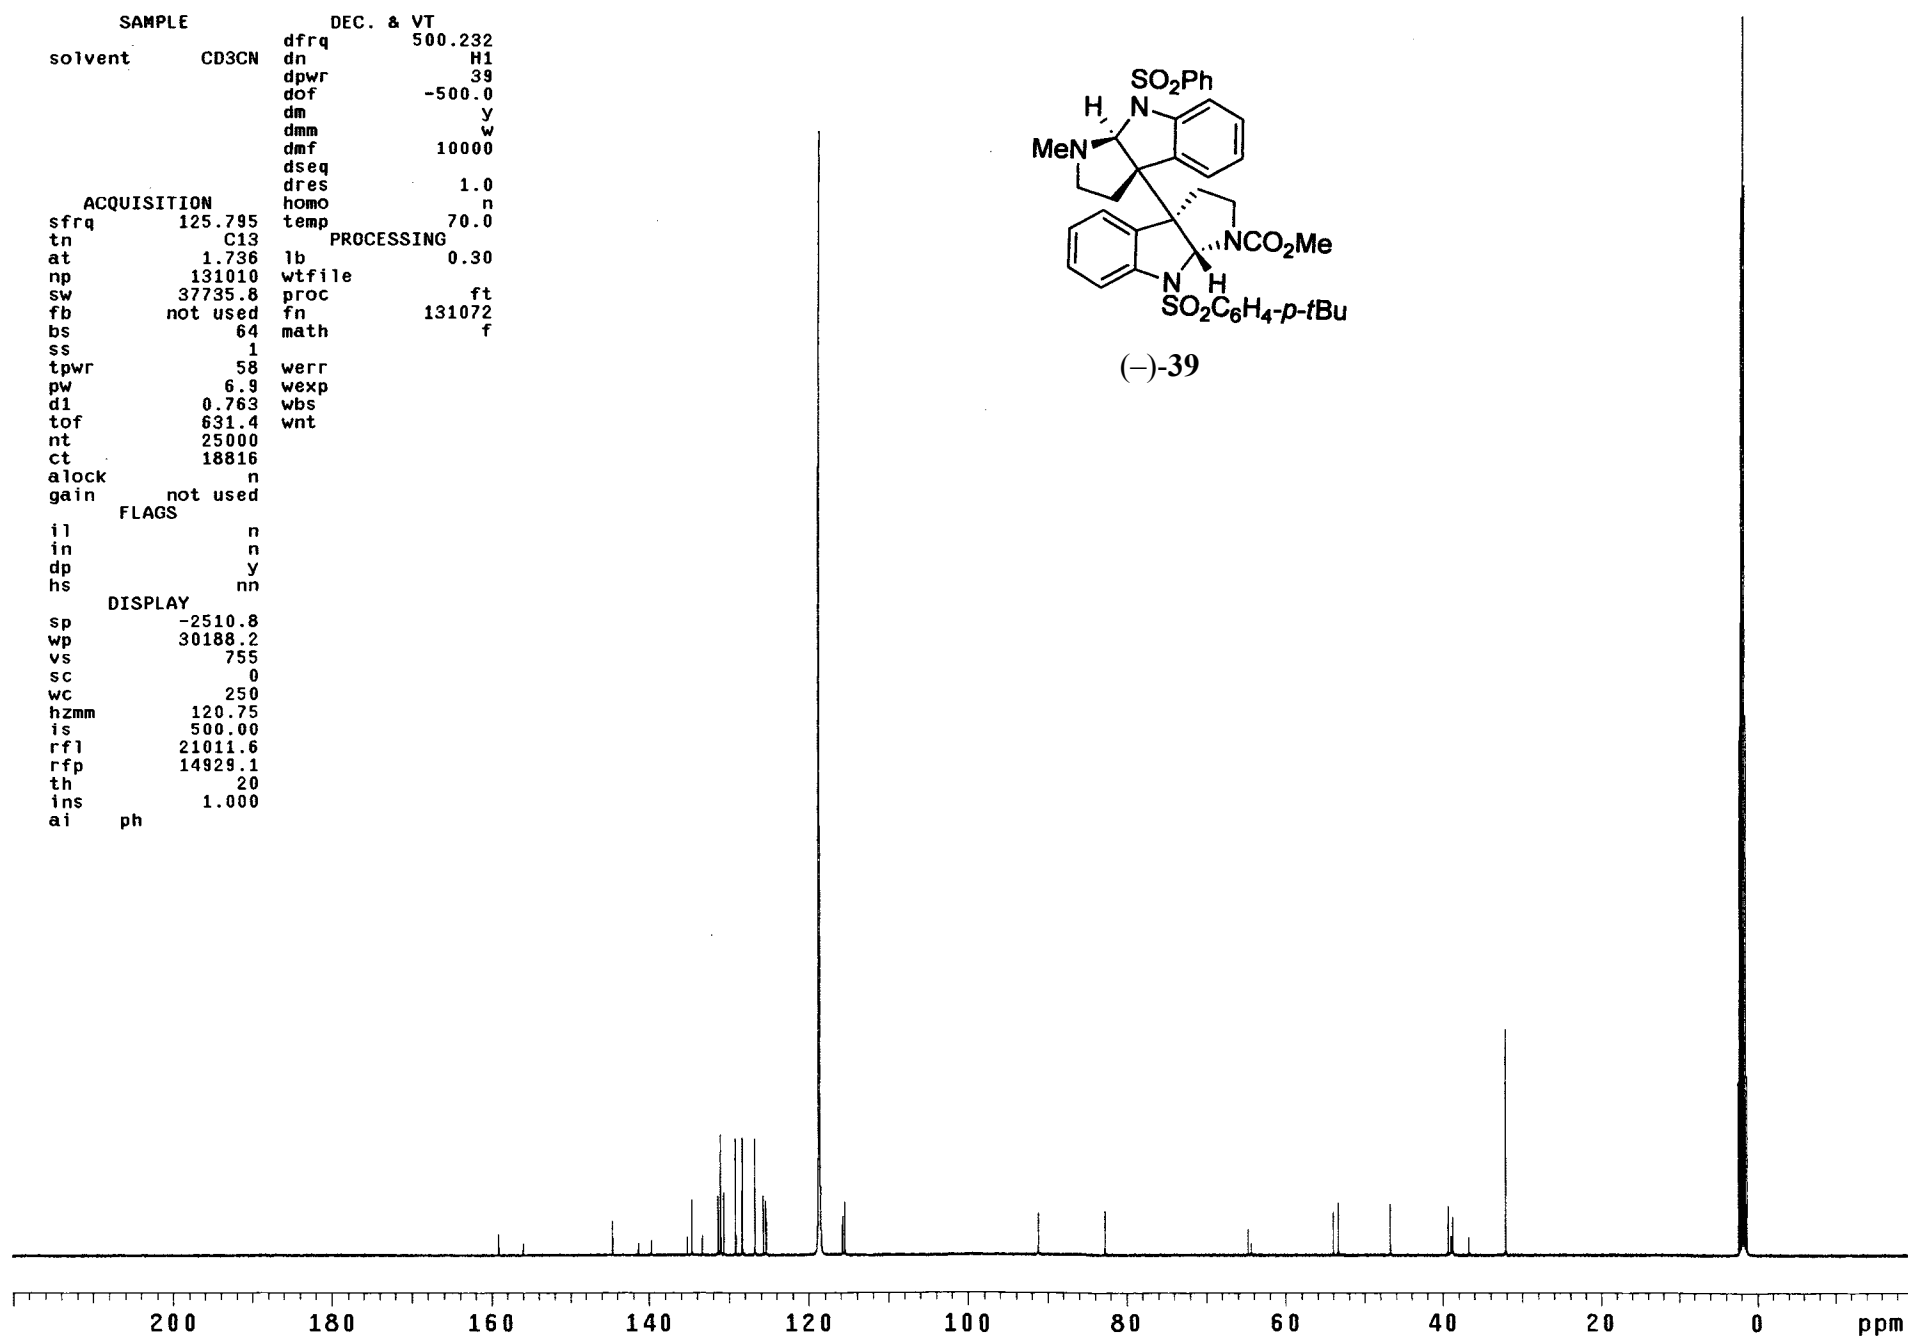

S152/S153

| SAMPLE      |          | DEC. & VT  |         |
|-------------|----------|------------|---------|
| solvent     | CD3CN    | dfrq       | 125.673 |
|             |          | dn         | C13     |
|             |          | dpwr       | 30      |
|             |          | dof        | 0       |
|             |          | dm         | nnn     |
|             |          | dmm        | w       |
|             |          | dmf        | 10000   |
|             |          | dseq       |         |
|             |          | dres       | 1.0     |
|             |          | homo       | n       |
|             |          | temp       | 75.0    |
| ACQUISITION |          | PROCESSING |         |
| sfrq        | 499.748  | wtfile     |         |
| tn          | H1       | proc       | ft      |
| at          | 3.001    | fn         | 262144  |
| np          | 63050    | math       | f       |
| sw          | 10504.2  |            |         |
| fb          | not used |            |         |
| bs          | 4        |            |         |
| tpwr        | 56       | werr       |         |
| pw          | 8.6      | wexp       |         |
| d1          | 2.000    | wbs        |         |
| tof         | 1519.5   | wnt        | wft     |
| nt          | 16       |            |         |
| ct          | 16       |            |         |
| alock       | n        |            |         |
| gain        | not used |            |         |
| FLAGS       |          |            |         |
| il          | n        |            |         |
| in          | n        |            |         |
| dp          | y        |            |         |
| hs          | nn       |            |         |
| DISPLAY     |          |            |         |
| sp          | -508.0   |            |         |
| wp          | 6508.8   |            |         |
| vs          | 23       |            |         |
| sc          | 0        |            |         |
| wc          | 250      |            |         |
| hzmm        | 26.04    |            |         |
| is          | 72.74    |            |         |
| rfl         | 2218.5   |            |         |
| rfp         | 969.5    |            |         |
| th          | 7        |            |         |
| ins         | 100.000  |            |         |
| ai          | ph       |            |         |

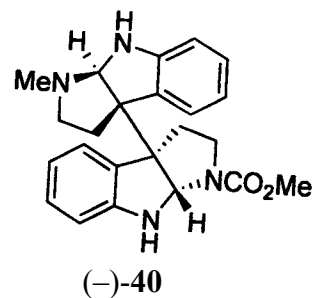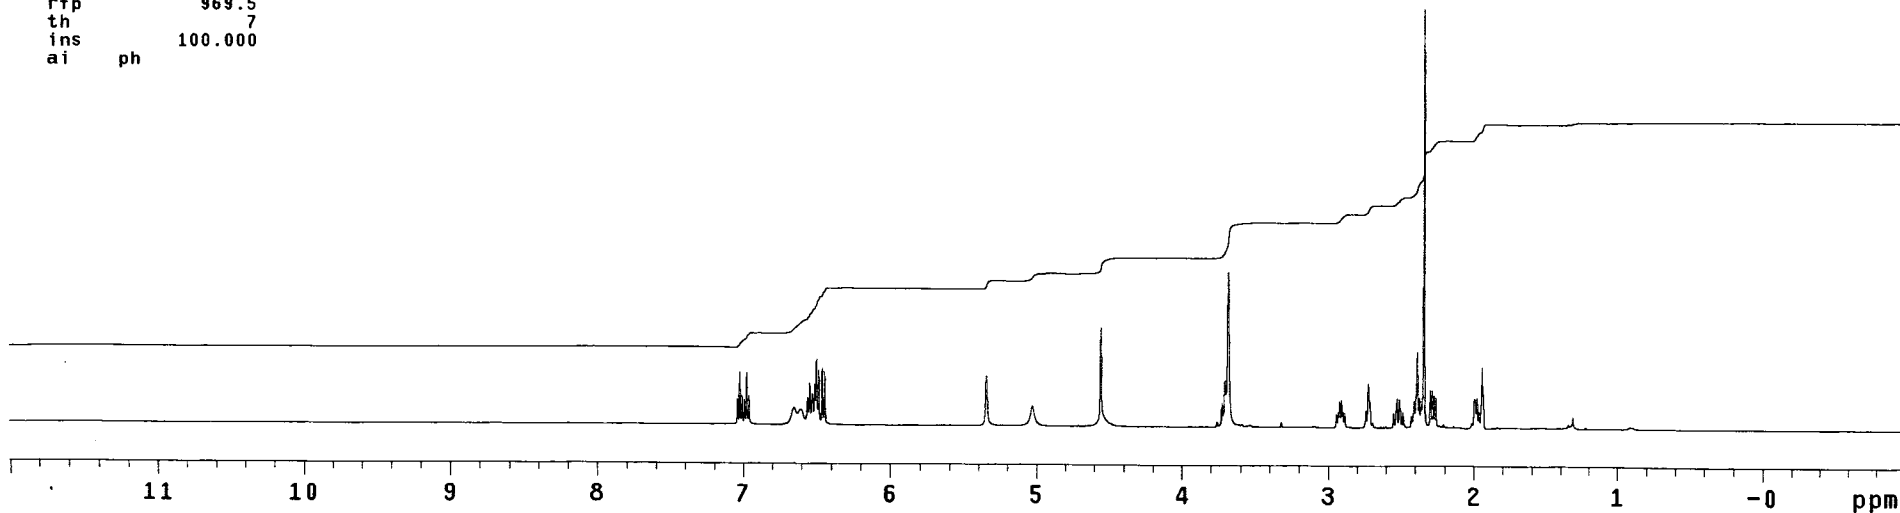



S153/S153

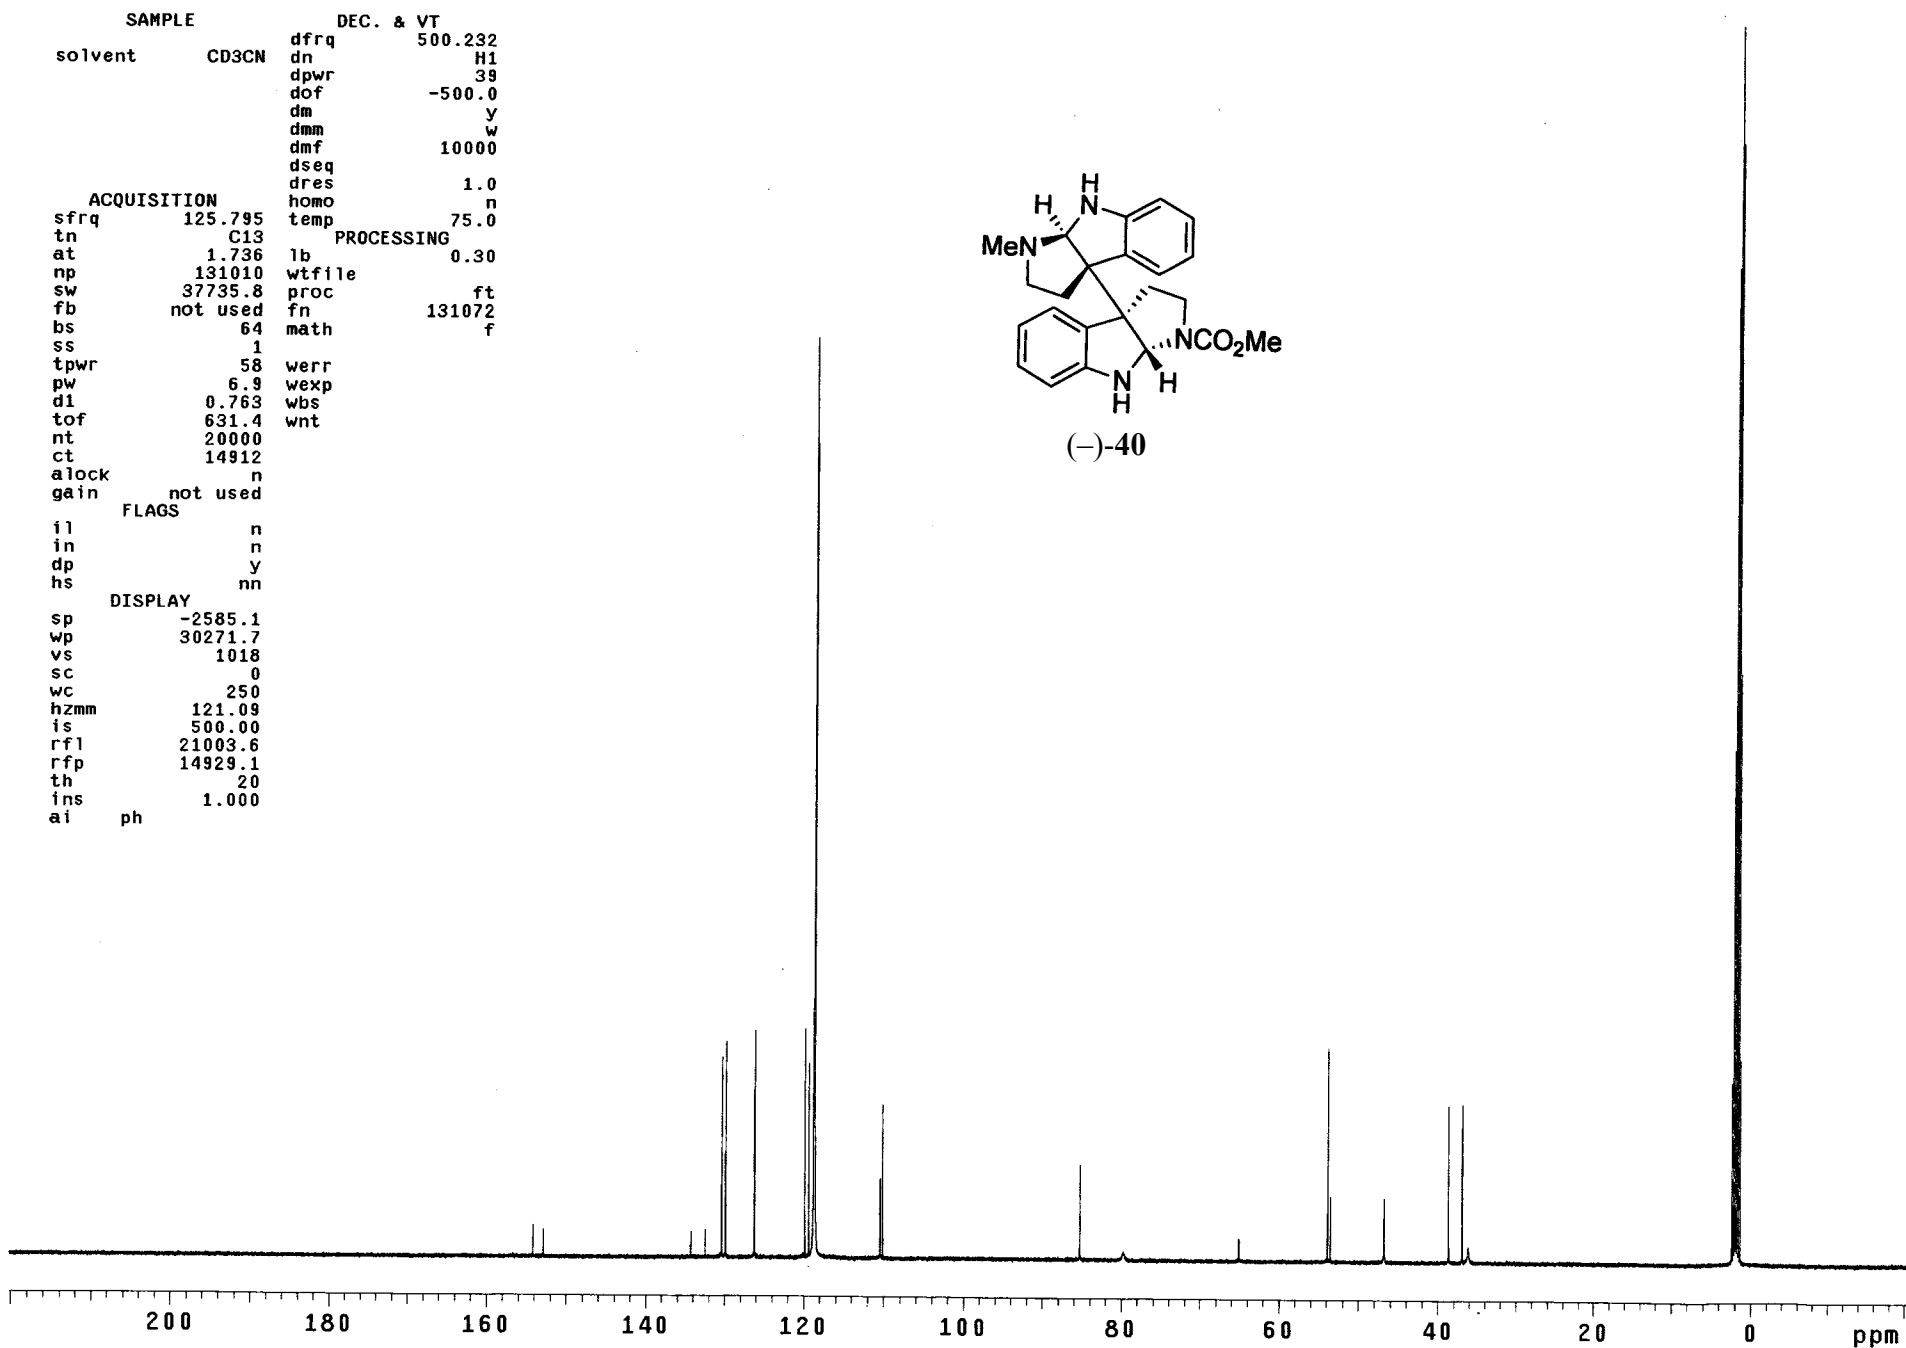

Supplement: c3sc52451e.pdf [file c3sc52451e.pdf]
